# Supplementary material
Source: publisher figshare collection journal article supplement (https://acs.figshare.com/ndownloader/files/16610255)
Supplement: Supplementary file 1 [file 16610255]

# Supporting Information

## Exploring the natural piericidins as anti-renal cell carcinoma agents targeting peroxiredoxin 1

Xuefeng Zhou,<sup>\*,#</sup> Zhi Liang,<sup>#</sup> Kunlong Li, Wei Fang, Yuanxin Tian, Xiaowei Luo, Yulian Chen, Zhikun Zhan, Tao Zhang, Shengrong Liao, Shuwen Liu, Yonghong Liu, William Fenical, and Lan Tang<sup>\*</sup>

<sup>#</sup> These authors contributed equally to this work.

<sup>\*</sup> X. Zhou (E-mail: xfzhou@scsio.ac.cn)

<sup>\*</sup> L. Tang (E-mail: tl405@smu.edu.cn).

### Contents

#### Supplementary Tables and Figures

**Table S1.** mRNA sequencing

**Table S2.** Volcano

**Table S3.** Intersection of DEGs from three groups (PA50\_Control, PA25\_Control, PA50\_PA25)

**Table S4.** KEGG enrichment analysis

**Table S5.** CytoscapeInput-edges-PA-turquoise.txt default edge

**Table S6.** CytoscapeInput-edges-PA-turquoise.txt default node

**Table S7.** Deduced ORFs of piericidin A biosynthetic gene cluster of SCSIO NS126

**Table S8.** 16S rRNA sequence of the strain *Streptomyces psammoticus* SCSIO NS126

**Table S9.** RT-qPCR primer sequence

**Table S10.** Baseline clinical characteristics of human kidney samples.

**Figure S1.** HPLC/MS spectra of the extract of strain NS126.

**Figure S2.** Cell apoptosis of ACHN cells induced by **1**.

**Figure S3.** Cell cycle of ACHN cells treated with **1**.

**Figure S4.** Weighted gene co-expression network of 63 DEGs genes analyzed in GSE40435.

**Figure S5.** Representative images of immunofluorescence staining of shPRDX1 ACHN cells

**Figure S6.** Antioxidant activities of PRDX1 after treated with PA/GPA.

**Figure S7.** The structure of decameric form of PRDX1 (PDB entry 2Z9S).

#### Supplementary Structure Elucidation

**Structure elucidation of compounds 1-27.**

**Figure S8.** Key HMBC, <sup>1</sup>H-<sup>1</sup>H COSY and NOESY correlations of **2-5**.

**Figure S9.** ECD spectrum of **3**, **4** and the calculated ECD curve of (13*S*,19*R*)-**3**.

**Figure S10.** Key HMBC, COSY and NOESY correlations of **12–20**.

**Figure S11.** Anomeric protons analysis of **14** in before and after NMR tube degradation.

**Figure S12.** Comparison of the sugar moieties of **14** and **16** in  $^1\text{H}$  and  $^{13}\text{C}$  NMR spectrum.

**Figure S13.** Key HMBC, COSY and NOESY correlations of **21–26**.

**Figure S14.** ECD spectrum of **10–26**.

**Table S11.**  $^1\text{H}$  NMR (700 MHz) Spectroscopic Data for **2–5**.

**Table S12.**  $^{13}\text{C}$  NMR (175 MHz) Spectroscopic Data for **2–5**.

**Table S13.**  $^1\text{H}$  NMR (700 MHz) Spectroscopic Data for **12–19**.

**Table S14.**  $^1\text{H}$  NMR (700 MHz) Spectroscopic Data for **20–26**.

**Table S15.**  $^{13}\text{C}$  NMR (175 MHz) Spectroscopic Data for **12–26**.

**Methods of the Glycosides Hydrolyzation.**

## References

## Spectra of the Compounds

**Figure SS-1.** HRESIMS,  $^1\text{H}$ -,  $^{13}\text{C}$ -NMR, DEPT spectra of **1**.

**Figure SS-2.** IR, HRESIMS,  $^1\text{H}$ ,  $^{13}\text{C}$ -NMR, DEPT, HSQC, HMBC, COSY, NOESY spectra of **2**.

**Figure SS-3.** IR, HRESIMS,  $^1\text{H}$ ,  $^{13}\text{C}$ -NMR, DEPT, HSQC, HMBC, COSY, NOESY spectra of **3**.

**Figure SS-4.** IR, HRESIMS,  $^1\text{H}$ ,  $^{13}\text{C}$ -NMR, DEPT, HSQC, HMBC, COSY, NOESY spectra of **4**.

**Figure SS-5.** IR, HRESIMS,  $^1\text{H}$ ,  $^{13}\text{C}$ -NMR, DEPT, HSQC, HMBC, COSY, NOESY spectra of **5**.

**Figure SS-6.** ESIMS,  $^1\text{H}$ ,  $^{13}\text{C}$ -NMR, DEPT spectra of **10**.

**Figure SS-7.** IR, HRESIMS,  $^1\text{H}$ ,  $^{13}\text{C}$ -NMR, DEPT, HSQC, HMBC, COSY, NOESY spectra of **12**.

**Figure SS-8.** IR, HRESIMS,  $^1\text{H}$ ,  $^{13}\text{C}$ -NMR, DEPT, HSQC, HMBC, COSY, NOESY spectra of **13**.

**Figure SS-9.** IR, HRESIMS,  $^1\text{H}$ ,  $^{13}\text{C}$ -NMR, DEPT, HSQC, HMBC, COSY, NOESY spectra of **14**.

**Figure SS-10.** IR, HRESIMS,  $^1\text{H}$ ,  $^{13}\text{C}$ -NMR, DEPT, HSQC, HMBC, COSY, NOESY spectra of **15**.

**Figure SS-11.** IR, HRESIMS,  $^1\text{H}$ ,  $^{13}\text{C}$ -NMR, DEPT, HSQC, HMBC, COSY, NOESY spectra of **16**.

**Figure SS-12.** IR, HRESIMS,  $^1\text{H}$ ,  $^{13}\text{C}$ -NMR, DEPT, HSQC, HMBC, COSY, NOESY spectra of **17**.

**Figure SS-13.** IR, HRESIMS,  $^1\text{H}$ ,  $^{13}\text{C}$ -NMR, DEPT, HSQC, HMBC, COSY, NOESY spectra of **18**.

**Figure SS-14.** IR, HRESIMS,  $^1\text{H}$ ,  $^{13}\text{C}$ -NMR, DEPT, HSQC, HMBC, COSY, NOESY spectra of **19**.

**Figure SS-15.** IR, HRESIMS,  $^1\text{H}$ ,  $^{13}\text{C}$ -NMR, DEPT, HSQC, HMBC, COSY, NOESY spectra of **20**.

**Figure SS-16.** IR, HRESIMS,  $^1\text{H}$ ,  $^{13}\text{C}$ -NMR, DEPT, HSQC, HMBC, COSY, NOESY spectra of **21**.

**Figure SS-17.** IR, HRESIMS,  $^1\text{H}$ ,  $^{13}\text{C}$ -NMR, DEPT, HSQC, HMBC, COSY, NOESY spectra of **22**.

**Figure SS-18.** IR, HRESIMS,  $^1\text{H}$ ,  $^{13}\text{C}$ -NMR, DEPT, HSQC, HMBC, COSY, NOESY spectra of **23**.

**Figure SS-19.** IR, HRESIMS,  $^1\text{H}$ ,  $^{13}\text{C}$ -NMR, DEPT, HSQC, HMBC, COSY, NOESY spectra of **24**.

**Figure SS-20.** IR, HRESIMS,  $^1\text{H}$ ,  $^{13}\text{C}$ -NMR, DEPT, HSQC, HMBC, COSY, NOESY spectra of **25**.

**Figure SS-21.** IR, HRESIMS,  $^1\text{H}$ ,  $^{13}\text{C}$ -NMR, DEPT, HSQC, HMBC, COSY, NOESY spectra of **26**.

## Supplementary Figures and Tables

**Tables S1~S6**, about the Transcriptome data and bioinformatic analysis (xls files), are submitted as a compressed file (.rar) as **Supporting Information 2 (SI2)**.

**Table S1.** mRNA sequencing.

**Table S2.** Volcano.

**Table S3.** Intersection of DEGs from three groups (PA50\_Control, PA25\_Control, PA50\_PA25).

**Table S4.** KEGG enrichment analysis.

**Table S5.** CytoscapeInput-edges-PA-turquoise.txt default edge.

**Table S6.** CytoscapeInput-edges-PA-turquoise.txt default node.

**Table S7.** Deduced ORFs of Piericidin A Biosynthetic Gene Cluster of SCSIO NS126

| Query_name | Query_length | Description | Protein Homolog and Origin     | Identity/ Similarity (%) | GenBank Accession Number |
|------------|--------------|-------------|--------------------------------|--------------------------|--------------------------|
| Query_1522 | 199          | PieR        | <i>Streptomyces piomogenus</i> | 81.9                     | AEZ54373.1               |
| Query_1523 | 2482         | PieA1       | <i>Streptomyces piomogenus</i> | 73.5                     | AEZ54374.1               |
| Query_1524 | 3379         | PieA2       | <i>Streptomyces piomogenus</i> | 79.6                     | AEZ54375.1               |
| Query_1525 | 1725         | PieA3       | <i>Streptomyces piomogenus</i> | 79.2                     | AEZ54376.1               |
| Query_1526 | 2161         | PieA4       | <i>Streptomyces piomogenus</i> | 80.2                     | AEZ54377.1               |
| Query_1527 | 1860         | PieA5       | <i>Streptomyces piomogenus</i> | 79.9                     | AEZ54378.1               |
| Query_1528 | 2354         | PieA6       | <i>Streptomyces piomogenus</i> | 79.7                     | AEZ54379.1               |
| Query_1529 | 228          | PieB1       | <i>Streptomyces piomogenus</i> | 84.6                     | AEZ54380.1               |
| Query_1530 | 170          | PieC        | <i>Streptomyces piomogenus</i> | 89.4                     | AEZ54381.1               |
| Query_1531 | 613          | PieD        | <i>Streptomyces piomogenus</i> | 87.2                     | AEZ54382.1               |
| Query_1532 | 257          | PieB2       | <i>Streptomyces piomogenus</i> | 89.4                     | AEZ54383.1               |
| Query_1533 | 589          | PieE        | <i>Streptomyces piomogenus</i> | 89.4                     | AEZ54384.1               |

**Table S8.** 16S rRNA sequence of the strains *Streptomyces psammoticus* SCSIO NS126

TCGGGGTAACCTTCGACGGCTCATCCCTACGGGTAGGCCACCGGCTTCGGGTGTTACCGACTTTCGTGACGTGACGG  
 GCGGTGTGTACAAGGCCCGGGAACGTATTCACCGCAGCATGCTGATCTGCGATTACTAGCAACTCCAACCTCATGGGGT  
 CGAGTTGCAGACCCCAATCCGAACGAGGCCGGCTTTTGGGATTGCTCCGCCTCACGGCATCGCAGCCCTTTGTACC  
 GACATTGTAGCACGTGTGCAGCCCAAGACATAAGGGGCATGATGATTGACGTCGTCCCCACCTTCTCCGAGTTGAC  
 CCCGGCAGTCTCCTGTGAGTCCCCGACATTACTCGCTGGCAACACAGAACAAGGGTTGCGCTCGTTGCGGGACTTAAC  
 CCAACATCTCAGACACGAGCTGACGACAACCATGCACCACCTGTATACCGACCACAAGGGGGCACCCATCTCTGGAT  
 GTTTCGGGCATATGTCAAGCCTTGTAAGGTTCTTCGCGTTGCGTCGAATTAAGCCACATGCTCCGCTGCTTGTGCGGG  
 CCCCCGTCAATTCTTTGAGTTTTCAGCCTTTCGCGCCGTAATCTCCCAAGGCGGGGAACCTAATGCGTTAGCTGCGGCACCG  
 ACGACGTGGAATGTGCGCAACACCTAGTTCCCAACGTTTACGGCGTGGACTACCAGGGTATCTAATCTGTTCGCTCCC  
 CACGCTTTCGCTCCTCAGCGTCAGTAATGGCCCAGAGATCCGCCTTCGCCACCGGTGTTCTCCTGATATCTGCGCATT  
 CACCGCTACACCAGGAATTCGATCTCCCCTACCACACTCTAGCCTGCCCGTATCGAATGCAGACCCGGGGTTAAGCCC  
 CGGGCTTTCACATCCGACGCGACAGGCCGCCTACGAGCTCTTACGCCCCAATAATCCGGACAACGCTCGCACCCCTACG  
 TATTACCGCGGCTGCTGGCACGTAGTTAGCCGGTGCTTCTTCTGCAGGTACCGTCACTTTCGCTTCTTCCCTGCTGAAA  
 GAGGTTTACAACCCGAAGGCCGTCATCCCTCAGCGGGCGTCGCTGCATCAGGCTTTCGCCCATTGTGCAATATTCCTCA  
 CTGCTGCCTCCCGTAGGAGTCTGGGCCGTGTCTCAGTCCCAGTGTGGCCGGTCGCCCTCTCAGGCCGGCTACCCGTCG  
 TCGCCTTGGTAGGCCATTACCCACCAACAAGCTGATAGGCCGCGGGCTCATCCTGCACCGCCGGAGCTTCCACCAA  
 CCCCCATGCGGAGGAAGGTCATATCCGGTATTAGACCCGTTTCCAGGGCTTGTCCAGAGTGCAGGGCAGATTGCC  
 ACGTGTTACTACCCGTTTCGCCACTGATCCACCCGAAGGGCTTCACCGTTCGACTGCAGGGTAAGCAGCT

**Table S9.** RT-qPCR primer sequence

| Gene           | Forward primer         | Reverse primer            |
|----------------|------------------------|---------------------------|
| <i>PRDX1</i>   | TCCTTTGGTATCAGACCCGA   | TAAAAAGGCCCTGAACGAG       |
| <i>EGFR</i>    | GACGCAGATAGTCGCCCAA    | ACGGTAGAAGTTGGAGTCTGTAGGA |
| <i>ETS1</i>    | AGGAGATGGGGAAGAGGAA    | GTGTACCCAGCAGGCTCT        |
| <i>SOD2</i>    | CTGATTTGGACAAGCAGCAA   | CTGGACAAACCTCAGCCCTA      |
| <i>HK2</i>     | GATTTACCAAGCGTGGACT    | CCACACCCACTGTCACCTTG      |
| <i>SLC2A1</i>  | AAGGTGATCGAGGAGTTCTACA | ATGCCCCAACAGAAAAGATG      |
| <i>LDHA</i>    | CAGCTTGGAGTTTGCAGTTAC  | TGATGGATCTCCAACATGG       |
| <i>MET</i>     | GAGAAGCCCAAGCCCATCC    | GCCCAGGGCTCAGAGCTT        |
| <i>VHL</i>     | CGTAGCGGTTGGTGACTTG    | CCCTGGTTTGTTCCTCTGAC      |
| $\beta$ -ACTIN | ACGTGGACATCCGCAAAGAC   | CAAGAAAGGGTGTAACGCAACTA   |

**Table S10.** Baseline clinical characteristics of human kidney samples

| Characteristics | Group                | number | Percentage (%) |
|-----------------|----------------------|--------|----------------|
| Gender          | Male                 | 3      | 50             |
|                 | Female               | 3      | 50             |
| Age (years)     | 18-37                | 1      | 16.7           |
|                 | 37-65                | 5      | 83.3           |
| Cancer          | Clear cell carcinoma | 6      | 100            |
|                 | Non-cancer           | 0      | 0              |



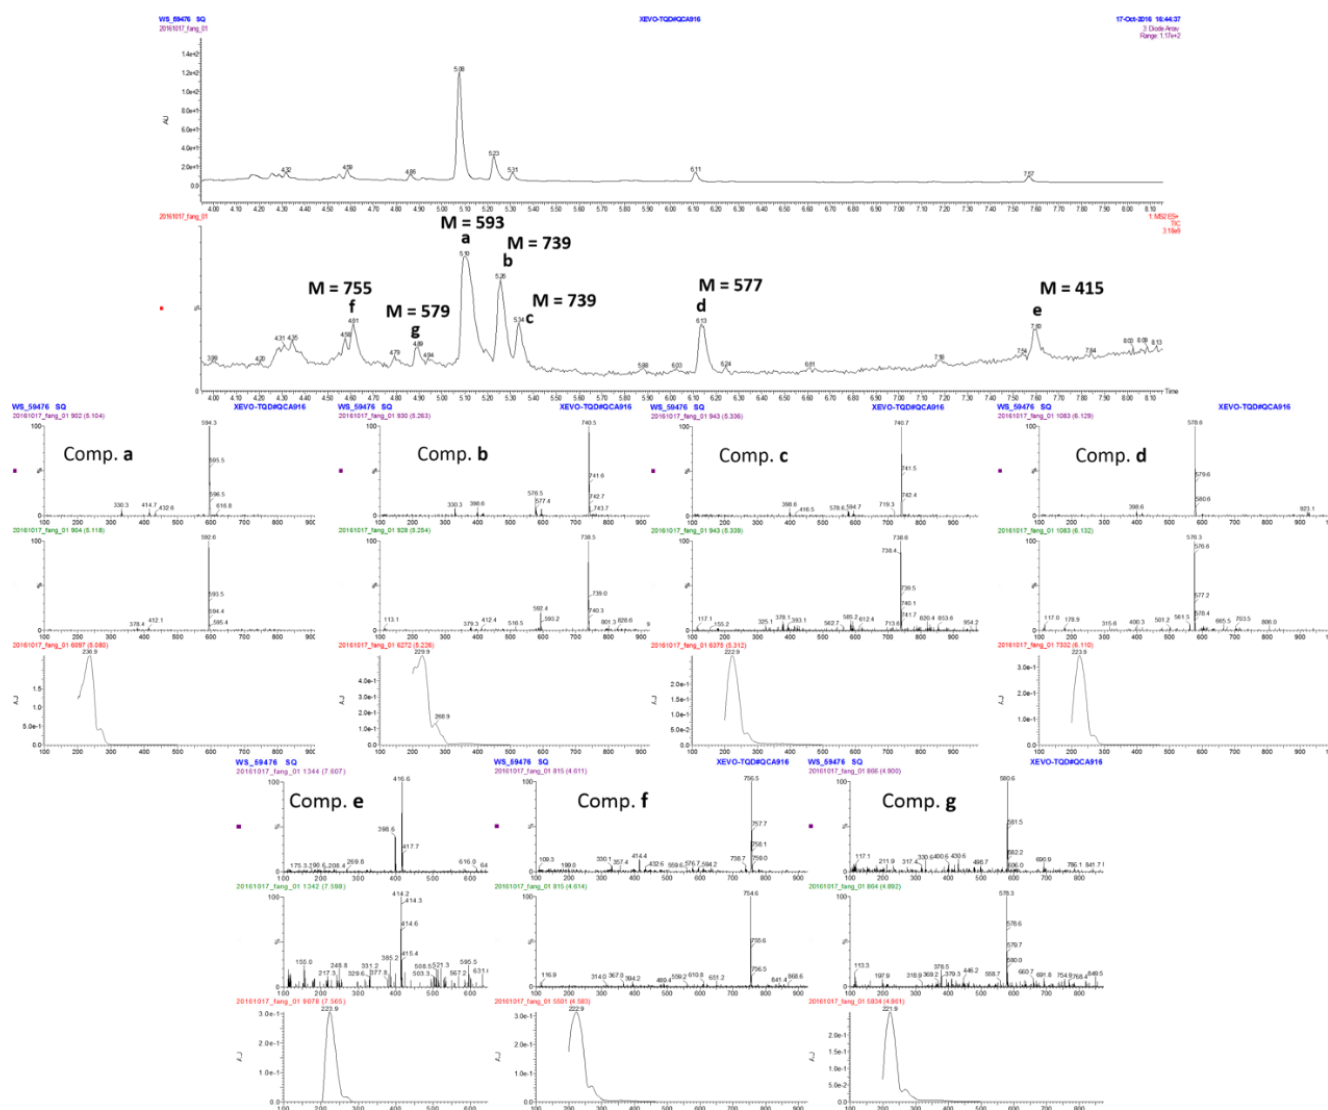

**Figure S1.** HPLC/MS spectra of the extract of strain NS126.

Piericidins present characteristic UV/vis spectra, one strong absorbance peak at 220–235 nm, and one weak absorbance peak at 260–270 nm. Aglycones or glycosides of piericidins could be determined by MS data. Peak **e** (7.6 min) of the TIC (total ion chromatogram) with molecular ion peak ( $m/z$  416.6  $[M + H]^+$ ) suggested that it is possibly piericidin A or its isomer. Moreover, peaks **a** (5.1 min), **d** (6.1 min), and **g** (4.9 min) of the TIC were suggested to be monoglycosides, while peaks **b** (5.2 min), **c** (5.3 min), and **f** (4.6 min) were diglycosides of piericidin.

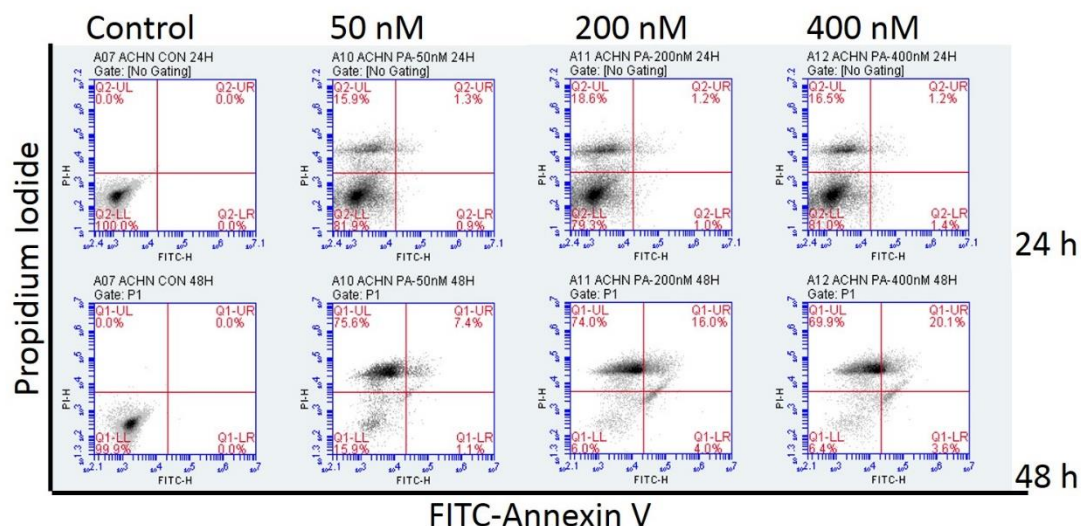

**Figure S2.** Cell apoptosis of ACHN cells induced by 1.

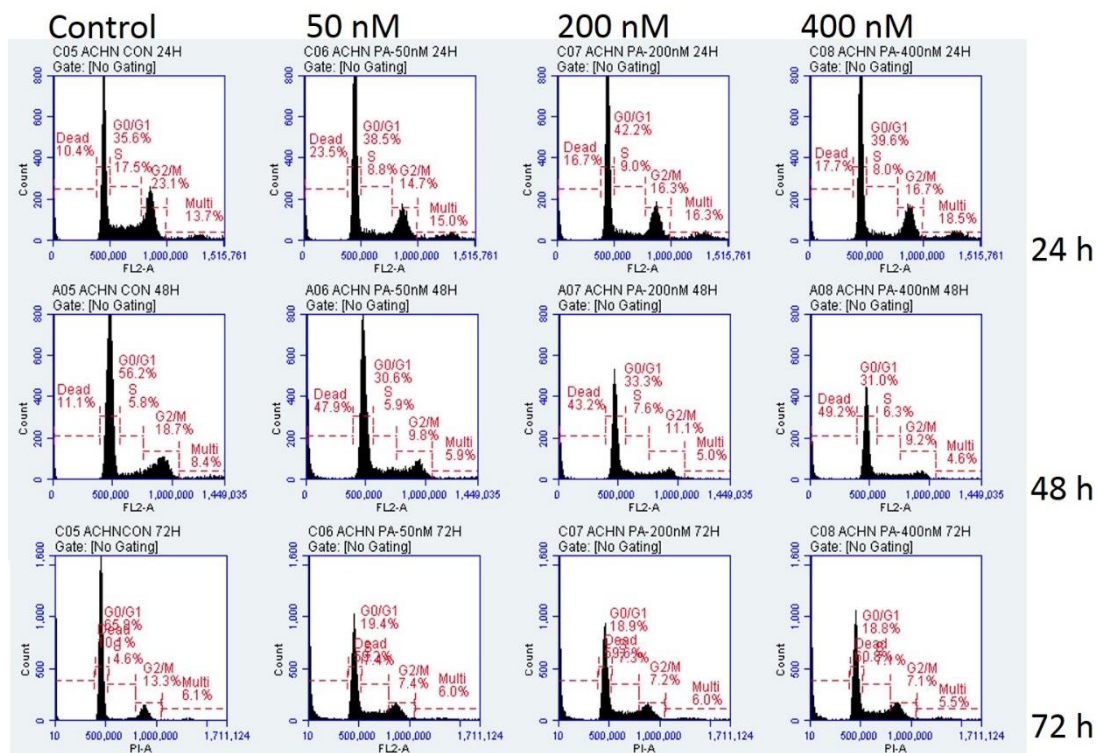

**Figure S3.** Cell cycle of ACHN cells treated with 1.

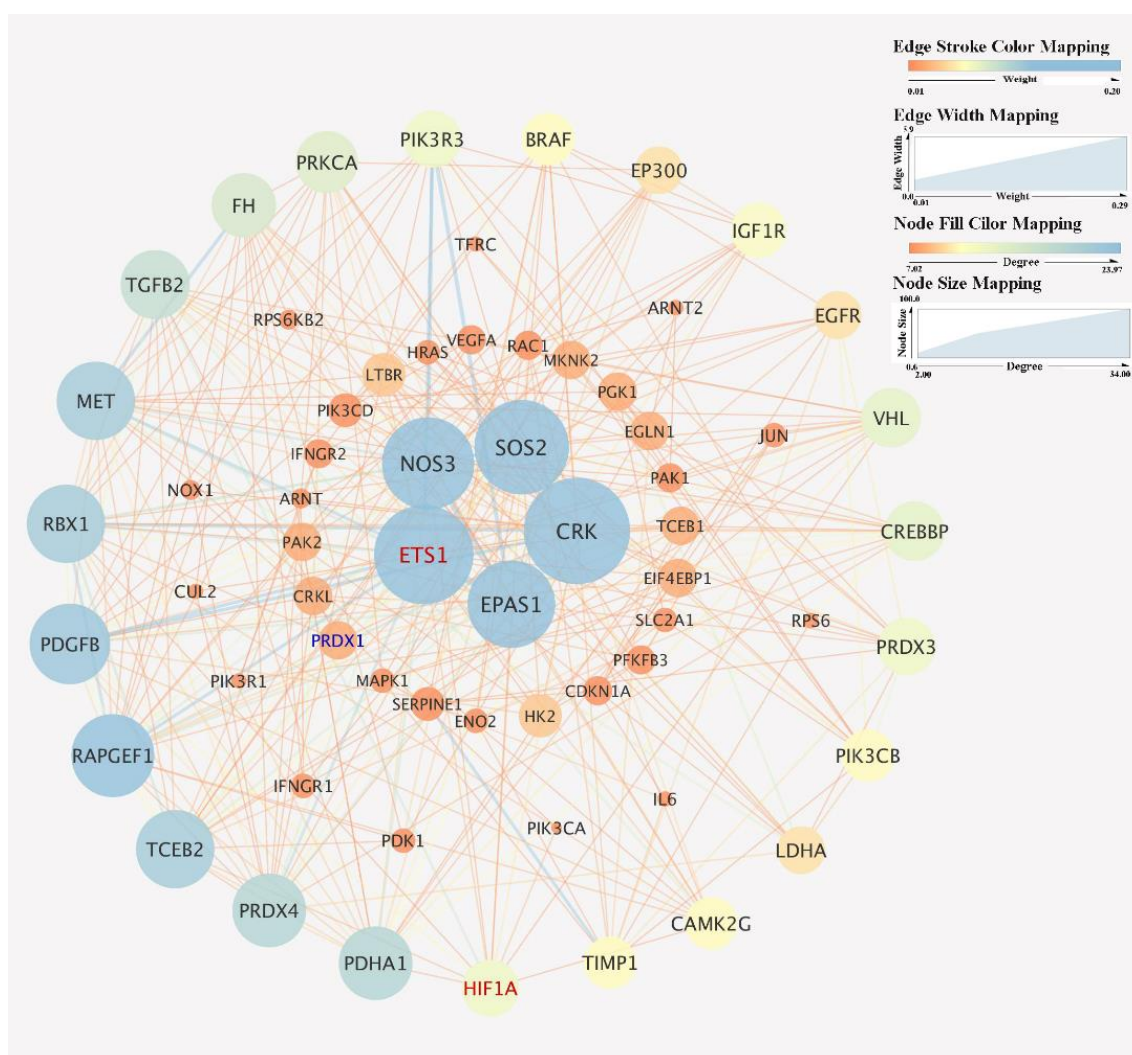

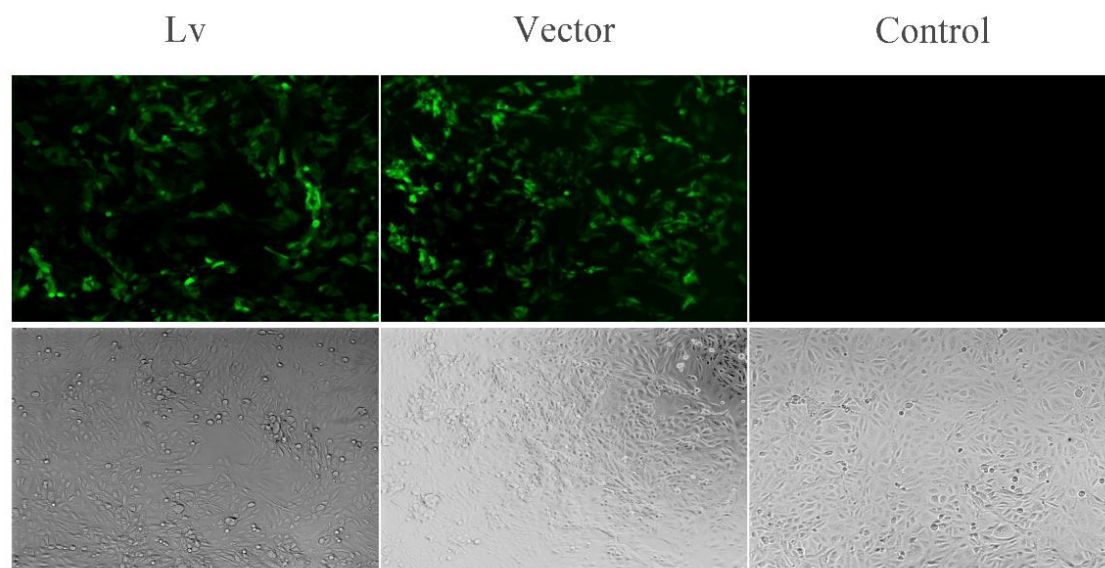

**Figure S5.** Representative images of immunofluorescence staining of shPRDX1 ACHN cells with 100X magnification in 72h. Lentivirus PRDX1 shRNA was diluted in enhance infection solution (Genechem, China). After 6-hour infection, complete medium containing puromycin (1 $\mu$ g/mL) was add to select the PRDX1 knockdown ACHN cells. The GFP microscope (green) indicates the shPRDX1 ACHN cells, compared with light microscope.

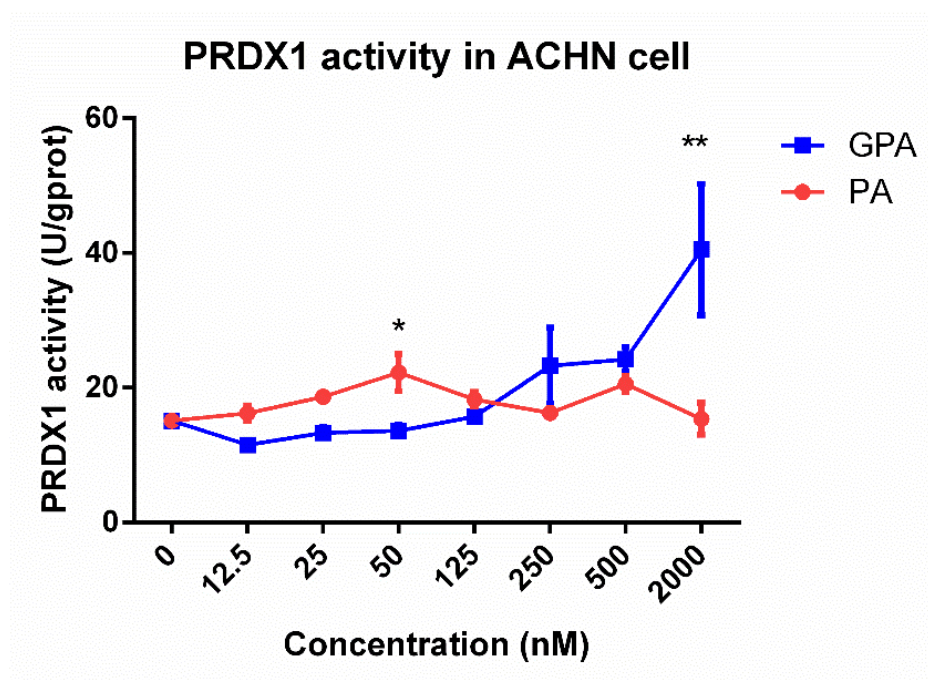

**Figure S6.** Antioxidant activities of PRDX1 after treated with PA/GPA in 24h using ELISA assay.



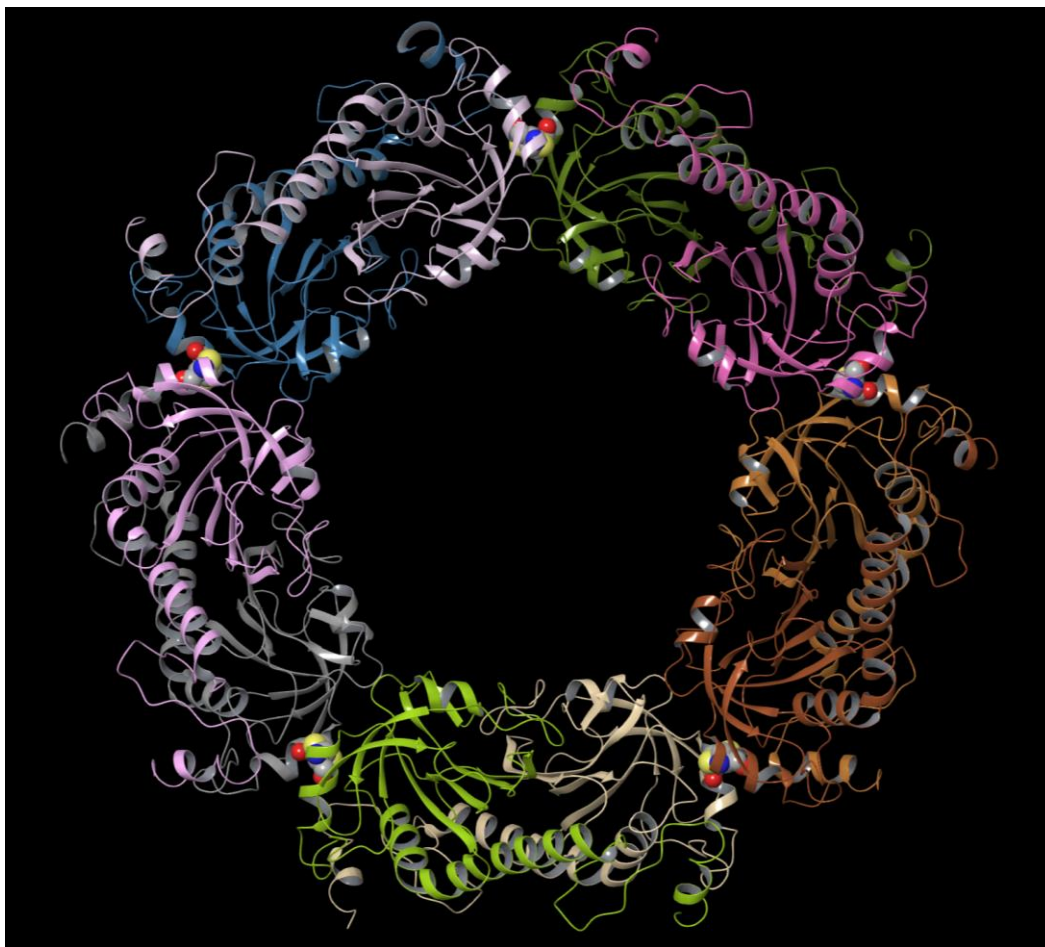

**Figure S7.** The structure of decameric form of PRDX1 (PDB entry 2Z9S).

## Supplementary Structure Elucidation

### Structure elucidation of compounds 1-27.

Compound **1**, the main metabolism of the strain SCSIO NS104, was established with its molecular formula  $C_{25}H_{37}NO_4$ , by HPLC/HRESIMS analysis in the extract of the fermentation. The structure of the purified **1** was characterized by comparison of its  $^1H$  and  $^{13}C$  NMR data with literature data<sup>[1]</sup> and was determined to be piericidin A (**1**, also piericidin A1).

Compound **2** was isolated as pale yellow oil. Its molecular formula was established by HR-ESIMS ( $m/z$  402.2649  $[M + H]^+$ ) to be  $C_{24}H_{35}NO_4$ . Comparison of its  $^1H$  and  $^{13}C$  NMR data with those of piericidin A (**1**) indicated that they shared the piericidin skeleton. The only difference was the absence of the 14-Me in **2**, which was confirmed by the HMBC correlations from H-10 ( $\delta_H$  3.75, dd,  $J = 7.6, 7.6$  Hz) to C-11 ( $\delta_C$  132.2), H-11 ( $\delta_H$  5.46, dd,  $J = 7.6, 15.2$  Hz) to C-13 ( $\delta_C$  18.1), H-12 ( $\delta_H$  5.70, dq,  $J = 15.2, 6.4$  Hz) to C-10 ( $\delta_C$  77.5), and H<sub>3</sub>-13 ( $\delta_H$  1.72, d,  $J = 6.4$  Hz) to C-12 ( $\delta_C$  129.1), together with COSY correlations H<sub>3</sub>-13/H-12/H-11/H-10/H-9/H-8 (H<sub>3</sub>-15) (**Figure S8**). The 2*E*, 5*E*, 7*E* and 11*E* configurations of the double bonds were also deduced by the NOESY correlations (**Figure S8**). Thus, compound **2** was identified as 11-demethyl-piericidin A (**2**).

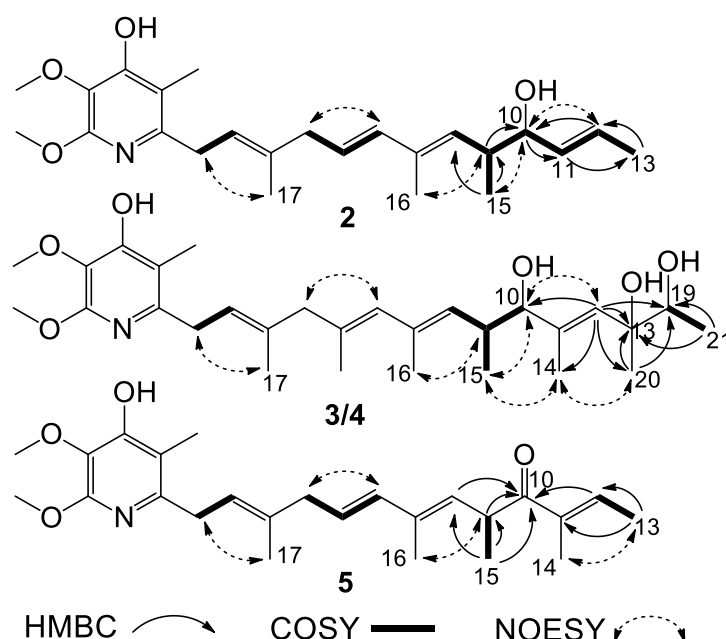

**Figure S8.** Key HMBC,  $^1\text{H}$ - $^1\text{H}$  COSY and NOESY correlations of **2**–**5**.

Compound **3** was isolated as pale yellow oil. Comparison of its  $^1\text{H}$  and  $^{13}\text{C}$  NMR data with those of IT-143-A<sup>[2]</sup> and piericidin C<sub>8</sub><sup>[3]</sup> indicated that they shared the piericidins skeleton. The only difference was an additional oxygenated methine ( $\delta_{\text{C}}$  75.1,  $\delta_{\text{H}}$  3.66, CH-19) and oxygenated quaternary carbon ( $\delta_{\text{C}}$  76.5, C-13) in **3**, instead of the olefinic bond in IT-143-A. Two hydroxyl groups on C-13 and C-19, confirmed by the HMBC correlations from H-12 ( $\delta_{\text{H}}$  5.46, s), H-20 ( $\delta_{\text{H}}$  1.28, s, 3H), H-21 ( $\delta_{\text{H}}$  1.14, d,  $J$  = 6.4 Hz, 3H) to C-13 and C-19 (**Figure S8**), were also supported by molecular formula  $\text{C}_{29}\text{H}_{45}\text{NO}_6$  established by HRESIMS, rather than the epoxide moiety. All of the double bonds and C-9/C-10 in **3** were deduced to be the same configurations (2*E*, 5*E*, 7*E*, 11*E*, 9*R*, 10*R*) with those reported piericidins, by the NOESY correlations, coupling constants, and also a biosynthetic point of view.

Compound **4** has a same molecular formula  $\text{C}_{29}\text{H}_{46}\text{NO}_6$  with **3**, as deduced from its HRESIMS. Its 1D and 2D NMR spectra showed resonances exactly similar with those of **3**, meanwhile the configurations (2*E*, 5*E*, 7*E*, 11*E*, 9*R*, 10*R*) of the four double bonds and C-9/C-10 were also the same. The small difference of C-12 ( $\delta_{\text{C}}$  132.8 in **3**, and  $\delta_{\text{C}}$  132.0 in **4**) and H-19 ( $\delta_{\text{H}}$  3.83 in **3**, and  $\delta_{\text{H}}$  3.77 in **4**) chemical shifts, by comparison of  $^1\text{H}$  and  $^{13}\text{C}$  NMR (in  $\text{CDCl}_3$ ) data of **3** and **4** (**Tables S11, S12**), as well as their different ECD curves (**Figure S9**), suggested **4** as a C-13/C-19 epimer of **3**. The absence of NOESY correlation between H<sub>3</sub>-20 and H-19 of **3/4** suggested an *anti*-relationship between 13-OH and 19-OH. The Boltzmann-weighted ECD curve of (13*S*, 19*R*)-**3** was calculated and compared with the experimental ECD curves of **3/4** (**Figure S9**), which led to the determination of 13*S*, 19*R* absolute configuration of **3**, and 13*R*, 19*S* absolute configuration of **4**. Consequently, compounds **3** (13*S*, 19*R*) and **4** (13*R*, 19*S*) were identified as a pair of epimers of (2*E*, 5*E*, 7*E*, 11*E*, 9*R*, 10*R*, 13*S*\*, 19*R*\*)-13,19-dihydroxyl-IT-143-A.

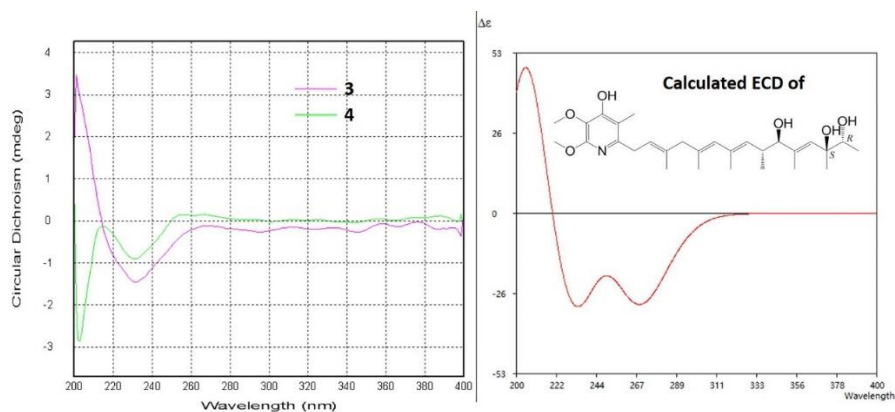

**Figure S9.** ECD spectrum of **3**, **4** and the calculated ECD curve of (13*S*, 19*R*)-**3**.

Compound **5** was isolated as clear oil. Its molecular formula was established by HR-ESIMS to be  $C_{25}H_{35}NO_4$ . Comparison of its  $^1H$  and  $^{13}C$  NMR data with those of piericidin A (**1**) (Tables S11, S12) showed that, the only difference was the replacement of the  $CHOH$ -10 in **1** by a ketone carbonyl group in **5**, which was confirmed by the HMBC correlations showed in Figure S8. C-10 ketone piericidin A was previously reported as a synthetic analogue of **1**.<sup>[4]</sup> The specific rotations (**5**:  $[\alpha]_D^{20} - 5.5$ ,  $c$  0.2,  $CHCl_3$ ; C-10 ketone piericidin A<sup>[4]</sup>:  $[\alpha]_D^{25} - 14$ ,  $c$  0.1,  $CH_2Cl_2$ ) indicated that **5** shared the same absolute configuration (9*R*) as those synthetic C-10 ketone piericidin A. Thus, (9*R*) 10-ketone piericidin A (**5**) was obtained in this study as a new natural product.

The structures of the other five known piericidin aglycones (**6**–**9**) were characterized by comparison of their NMR and MS data with literature data and were determined to be piericidins C2 (**6**), C1(**7**), and A2 (**8**)<sup>[1a]</sup>, and 7-demethylpiericidin A1 (**9**).<sup>[5]</sup>

Compound **10** was suggested to be a piericidin glycoside, with molecular weight 577 and similar UV curve with piericidin A (molecular weight 415), by HPLC/HRESIMS analysis in the extract of the strain SCSIO NS126 fermentation. The structure of the purified **10** was characterized by comparison of its  $^1H$  and  $^{13}C$  NMR data with literature data<sup>[6]</sup> and was determined to be glucopiericidin A (**10**).

Compound **11** was suggested to be an oxidative product of **10** because of its molecular weight 593 given by HPLC/HRESIMS. It was determined to be 13-hydroxyglucopiericidin A (**11**) by comparison of its  $^1H$  and  $^{13}C$  NMR data with literature data.<sup>[7]</sup>

Compound **12** was obtained with its molecular formula  $C_{30}H_{45}NO_9$ , established by HR-ESIMS ( $m/z$  564.3185  $[M + H]^+$ ). Comparison of its  $^1H$  and  $^{13}C$  NMR data with those of **10** indicated that they shared the piericidin glycoside skeleton. The only difference was the absence of the 16-Me linked to C-7 in **12**, which was confirmed by the HMBC correlations like from H-5 ( $\delta_H$  5.54, dt,  $J = 13.9$ , 7.1 Hz) to C-7 ( $\delta_C$  131.0), and from H-9 ( $\delta_H$  2.45, m) to C-7, together with  $H_2$ -4/H-5/H-6/H-7/H-8/H-9/H-10 COSY correlations (Figure S10). Compound **12** was suggested to be the glycoside of 7-demethylpiericidin A1 (**9**). The  $^1H$  and  $^{13}C$  NMR spectrum ( $CD_3OD$ ) showed signals due to a D-glucose group [ $\delta_H$  4.20 (d,  $J = 7.8$  Hz, H-1''); 3.19 (d,  $J = 8.9$ , 7.8 Hz, H-2''); 3.30 (dd,  $J = 8.9$ , 8.7 Hz, H-3''); 3.29 (dd,  $J = 9.1$ , 8.7 Hz, H-4''); 3.11(ddd,  $J = 9.1$ , 5.3, 2.5 Hz, H-5''); 3.62 (dd,  $J = 11.8$ , 5.4 Hz, H-6'a); 3.74 (dd,  $J = 11.8$ , 2.5 Hz, H-6''b);  $\delta_C$  104.2 (C-1''), 75.7 (C-2''), 78.3 (C-3''), 71.6, (C-4''), 77.7 (C-5''), and 62.8 (C-6'')], which was also confirmed by the acid hydrolysis of **12**. The coupling constant of the anomeric proton ( $\delta_H$  4.20, d,  $J = 7.8$  Hz) indicated that the glycosyl linkage is of  $\beta$ -configuration, and the 10-*O*-D-glucoside linkage was determined by the down-field shift of C-10 ( $\delta_C$

93.7) and the HMBC correlations from H-1'' to C-10.<sup>[6]</sup> The double bonds in side chain and C-9/C-10 were deduced to be the same configurations (2*E*,5*E*,7*E*,11*E*,9*R*,10*R*) with those of obtained piericidin aglycones, by the NOESY correlations, coupling constants, and also a biosynthetic point of view. Thus, **12** was characterized as 7-demethylglucopiericidin A (**12**).

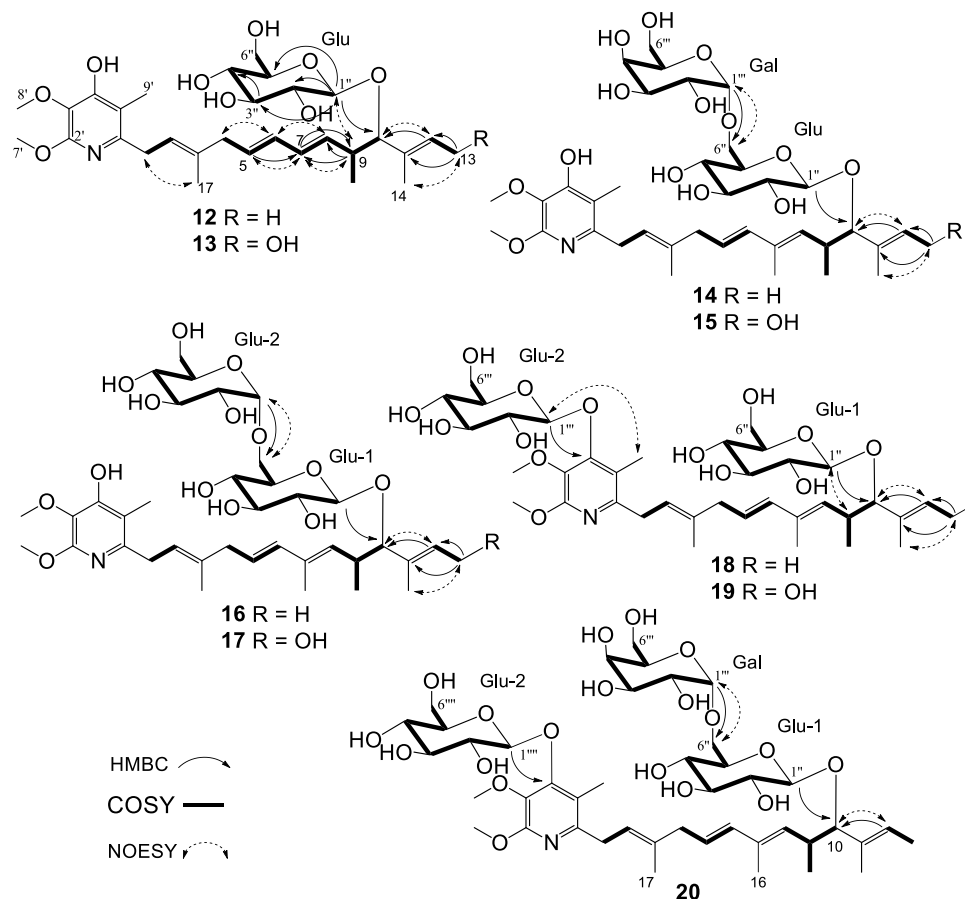

**Figure S10.** Key HMBC, COSY and NOESY correlations of **12**–**20**.

Compound **13** was obtained with its molecular formula  $C_{30}H_{45}NO_{10}$ , established by HR-ESIMS ( $m/z$  580.3126  $[M + H]^+$ ). Comparison of its  $^1H$  and  $^{13}C$  NMR data with those of **12** indicated that they shared the piericidin glycoside skeleton (Tables S13, S15). The only difference was the replacement of the 13-Me in **12** by an oxygenated methylene in **13**, which was confirmed by the HMBC correlations from H<sub>2</sub>-13 ( $\delta_H$  3.90, dd,  $J = 13.0, 6.3$  Hz; 3.98, dd,  $J = 13.0, 6.3$  Hz) to C-11 ( $\delta_C$  135.4) and C-12 ( $\delta_C$  128.7), and COSY correlations of H<sub>2</sub>-13/H-12 ( $\delta_H$  5.43, t,  $J = 6.3$  Hz). The glycosyl linkage and the configurations were also confirmed by HMBC, COSY and NOESY correlations showed in Figure S10. Compound **13** was characterized as 7-demethyl-13-hydroxyglucopiericidin A (**13**).

Compound **14** was obtained with its molecular formula  $C_{37}H_{57}NO_{14}$ , established by HR-ESIMS ( $m/z$  738.3712  $[M - H]^-$ ). Comparison of its  $^1H$  and  $^{13}C$  NMR data with those of **10** indicated that **14** is also a piericidin glycoside with an additional glycosyl group (Table S13, S15). NMR tube degradation method for sugar analysis of **14** revealed that another sugar was D-galactose (Figure S11),<sup>[8]</sup> also supported by  $^1H$  and  $^{13}C$  NMR data (Figure S12).<sup>[9]</sup> The coupling constant of the two anomeric protons ( $\delta_H$  4.09, d,  $J = 7.8$  Hz, H-1'' of Glu;  $\delta_H$  4.64, d,  $J = 2.2$  Hz, H-1''' of Gal) indicated that the glycosyl linkage were of  $\beta$ - and  $\alpha$ - configurations for glucose and galactose, respectively. The galactose linkage was established at C-6'' of the glucosyl residue by an HMBC correlations from  $\delta_H$



4.64 (H-1''' of Gal) to  $\delta_C$  67.2 (C-6'' of Glu). Thus, compound **14** was characterized as piericidin A 10-*O*- $\alpha$ -D-galactose (1 $\rightarrow$ 6)- $\beta$ -D-glucoside (**14**). This structure was reported recently without clear determination.<sup>[9]</sup>

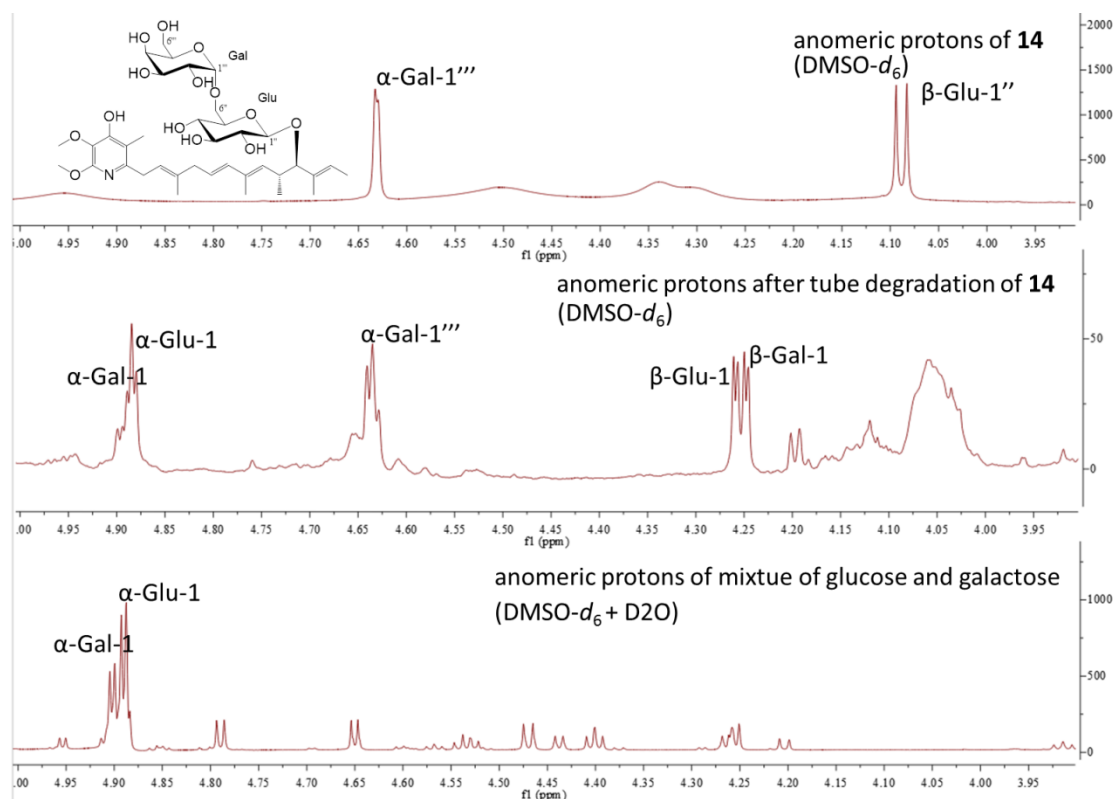

**Figure S11.** Anomeric protons analysis of **14** before and after NMR tube degradation.

Compound **15** was obtained with its molecular formula  $C_{37}H_{57}NO_{15}$ , established by HR-ESIMS ( $m/z$  754.3646  $[M - H]^-$ ). Comparison of its  $^1H$  and  $^{13}C$  NMR data with those of **14** indicated that they shared the piericidin diglycosides skeleton. The only difference was the replacement of the 13-Me in **14** by an oxygenated methylene in **15**, which was confirmed by the HMBC correlations from (3.96, dd,  $J = 13.0, 6.3$  Hz; 4.00, dd,  $J = 13.0, 6.3$  Hz) to C-11 ( $\delta_C$  134.3) and C-12 ( $\delta_C$  128.8), and COSY correlations of H<sub>2</sub>-13/H-12 ( $\delta_H$  5.42, t,  $J = 6.3$  Hz) (Figure S10). The coupling constant of the two anomeric protons ( $\delta_H$  4.11, d,  $J = 8.0$  Hz, H-1'' of Glu;  $\delta_H$  4.64, d,  $J = 2.9$  Hz, H-1''' of Gal) indicated that the same glycosyl linkage ( $\beta$ -D-glucose and  $\alpha$ -D-galactose configurations) in **15** as those in **14**. Compound **15** was characterized as 13-hydroxypiericidin A 10-*O*- $\alpha$ -D-galactose (1 $\rightarrow$ 6)- $\beta$ -D-glucoside (**15**).

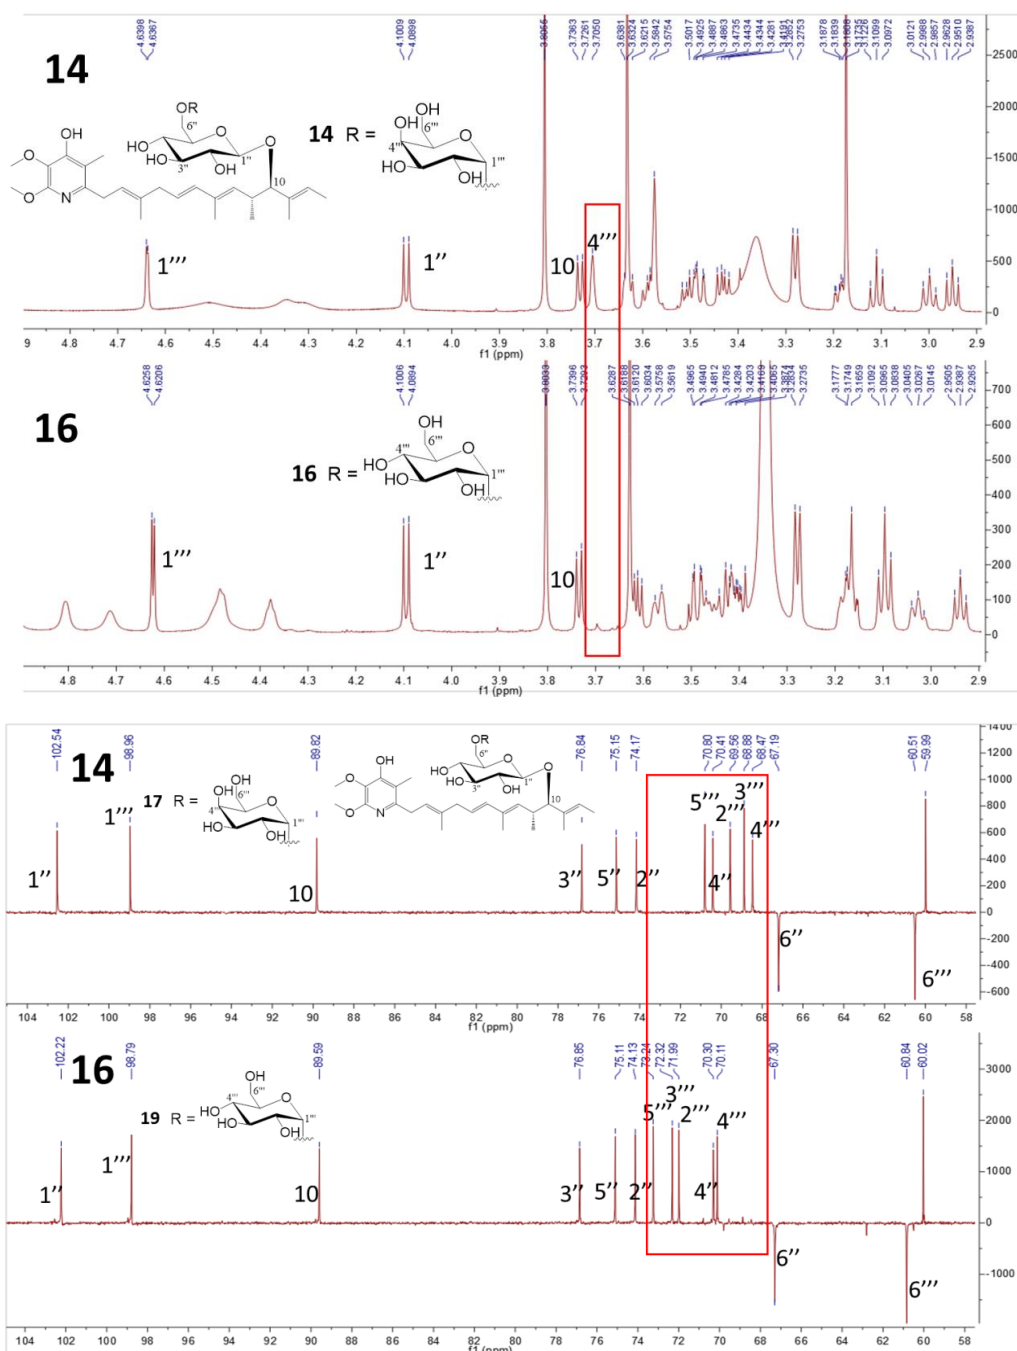

**Figure S12.** Comparison of the sugar moieties of **14** and **16** in  $^1\text{H}$  and  $^{13}\text{C}$  NMR spectrum.

Compound **16** was also suggested to be a piericidin diglycoside, based on the molecular formula  $\text{C}_{37}\text{H}_{57}\text{NO}_{14}$  established by HR-ESIMS ( $m/z$  738.3702  $[\text{M} - \text{H}]^-$ ). The NMR data of **16** were similar to those of **14**, except for some small differences of the  $^1\text{H}$  and  $^{13}\text{C}$  chemical shifts of position CH-2''', CH-3''', CH-4''' (Figure S12, Tables S13, S15). Only glucose was yield after acid hydrolysis of **16**, suggesting diglycoside of **16**. The coupling constant of the two anomeric protons ( $\delta_{\text{H}}$  4.10, d,  $J = 7.8$  Hz, H-1'' of Glu-1;  $\delta_{\text{H}}$  4.62, d,  $J = 3.6$  Hz, H-1''' of Glu-2) indicated that the glycosyl linkage were of  $\beta$ - and  $\alpha$ - configurations for two glucoses. The Glu-2 linkage was established at C-6'' of the Glu-1 by an HMBC correlations from  $\delta_{\text{H}}$  4.62 (H-1''' of Glu-2) to  $\delta_{\text{C}}$  67.3 (C-6'' of Glu-1) (Figure S10). Thus, compound **16** was characterized as piericidin A 10-*O*- $\alpha$ -D-glucose (1 $\rightarrow$ 6)- $\beta$ -D-glucoside (**16**). This structure was reported as the name BE-14324 in the Japanese patent.<sup>[10]</sup>

Compound **17** was obtained with its molecular formula  $C_{37}H_{57}NO_{15}$ , established by HR-ESIMS ( $m/z$  754.3660  $[M - H]^-$ ). Comparison of its  $^1H$  and  $^{13}C$  NMR data with those of **16** indicated that they shared the piericidin diglucosides skeleton (Table S13, S15). The only difference was the replacement of the 13-Me in **16** by an oxygenated methylene in **17**, which was confirmed by the HMBC correlations from H<sub>2</sub>-13 (3.97, dd,  $J = 13.0, 6.3$  Hz; 4.01, dd,  $J = 13.0, 6.3$  Hz) to C-11 ( $\delta_C$  134.0) and C-12 ( $\delta_C$  129.0), and COSY correlations of H<sub>2</sub>-13/H-12 ( $\delta_H$  5.42, m) (Figure S10). The coupling constant of the two anomeric protons ( $\delta_H$  4.12, d,  $J = 7.8$  Hz, H-1'' of Glu-1;  $\delta_H$  4.64, d,  $J = 3.6$  Hz, H-1''' of Glu-2) indicated that the same glycosyl linkage in **17** as those in **16**. Compound **17** was characterized as 13-hydroxypiericidin A 10-*O*- $\alpha$ -D-glucose (1 $\rightarrow$ 6)- $\beta$ -D-glucoside (**17**).

Compound **18** was also suggested to be a piericidin diglucoside, based on the molecular formula  $C_{37}H_{57}NO_{14}$  established by HR-ESIMS ( $m/z$  738.3684  $[M - H]^-$ ). Comparison of its NMR data with those of glucopiericidin A (**10**) indicated that the only difference was an additional glycosyl group linked on OH-4' of the pyridine ring, which was confirmed by the HMBC correlations from H-1''' ( $\delta_H$  5.09, d,  $J = 7.4$  Hz) to C-4' ( $\delta_C$  154.3), and NOESY correlations of H-1'''/H-9' ( $\delta_H$  2.07, s, 3H) (Figure S10). The coupling constant of the two anomeric protons, indicated that both of the glucoses were  $\beta$  glucosyl linkage. So, the structure of **18** was characterized as 4'-*O*- $\beta$ -D-glucose glucopiericidin A (**18**).

Compound **19** was obtained with its molecular formula  $C_{37}H_{57}NO_{15}$ , established by HR-ESIMS ( $m/z$  756.3829  $[M + H]^+$ ). Comparison of its  $^1H$  and  $^{13}C$  NMR data with those of **18** indicated that they shared the piericidin diglucosides skeleton (Tables S13, S15). The only difference was the replacement of the 13-Me in **18** by an oxygenated methylene in **19**, which was confirmed by the HMBC correlations from H<sub>2</sub>-13 (4.05, dd,  $J = 12.8, 7.2$  Hz; 4.17, dd,  $J = 12.8, 7.2$  Hz) to C-11 ( $\delta_C$  139.1) and C-12 ( $\delta_C$  128.8), and COSY correlations of H<sub>2</sub>-13/H-12 ( $\delta_H$  5.58, t,  $J = 6.2$  Hz) (Figure S10). The coupling constant of the two anomeric protons indicated that both of the glucoses were  $\beta$  glucosyl linkage. So, the structure of **19** was characterized as 4'-*O*- $\beta$ -D-glucose 13-hydroxyglucopiericidin A (**19**).

Compound **20** was obtained with its molecular formula  $C_{43}H_{67}NO_{19}$ , established by HR-ESIMS ( $m/z$  902.4390  $[M + H]^+$ ). Its NMR data indicated three glycosyl groups in the structure, with three anomeric protons ( $\delta_H$  4.25, d,  $J = 7.8$  Hz, H-1'' of Glu-1;  $\delta_H$  4.84, d,  $J = 3.2$  Hz, H-1''' of Gal;  $\delta_H$  5.23, d,  $J = 7.5$  Hz, H-1'''' of Glu-2). Comparison of its NMR data with those of **14** indicated that **20** had the same  $\alpha$ -D-galactose (1 $\rightarrow$ 6)- $\beta$ -D-glucoside moiety linked on C-10, and comparison with those of **18** and **19** revealed a  $\beta$ -D-glucose group linked on OH-4' of the pyridine ring in **20**. The structure of this piericidin triglycoside was confirmed by the HMBC, COSY, and NOESY correlations (Figure S10), and characterized as 4'-*O*- $\beta$ -D-glucose piericidin A 10-*O*- $\alpha$ -D-glucose (1 $\rightarrow$ 6)- $\beta$ -D-glucoside (**20**).

Compound **21** was obtained with its molecular formula  $C_{32}H_{51}NO_{11}$ , established by HR-ESIMS ( $m/z$  626.3543  $[M + H]^+$ ). Comparison of its  $^1H$  and  $^{13}C$  NMR data with those of glucopiericidin A (**10**) indicated that they shared the piericidin glycoside skeleton. The only difference was the replacement of the C-5/C-6 olefinic methines in **10** by two oxygenated methines and another oxygenated methyl in **21**. The moiety of -OH on C-5 and -OMe on C-6 was confirmed by the HMBC correlations from H<sub>2</sub>-4 (2.51, br.d,  $J = 13.9$  Hz; 2.03, dd,  $J = 13.9, 8.9$  Hz) to C-5 ( $\delta_C$  70.1), from H-6 ( $\delta_H$  3.20, d,  $J = 8.4$  Hz) to C-4 ( $\delta_C$  43.2), C-5, C-8 ( $\delta_C$  137.5), C-16 ( $\delta_C$  11.3), from H<sub>3</sub>-(6-OMe) ( $\delta_H$  3.11, s) to C-6 ( $\delta_C$  92.3), and COSY correlations of H<sub>2</sub>-4/H-5 ( $\delta_H$  3.69, ddd,  $J = 8.9, 8.4, 2.7$  Hz)/H-6 (Figure S13). The NMR data (Tables S14, S15) indicated the presence of a  $\beta$ -D-glucose group in **21**, same as in **10**–**13**. All the double bonds in side chain were deduced to be *E* configurations by the NOESY correlations.

The C-9/C-10 configurations were considered as 9*R*, 10*R*, as same as those of all the obtained piericidins, on a biosynthetic point of view. The relative configurations of C-5/C-6 were determined by the coupling constant ( $J_{\text{H-5/H-6}} = 8.4$  Hz), and the NOESY correlation of H-(6-OMe) and H-10 indicated they were on the same side of the C-7/C-8 double bond (**Figure S13**). Accordingly, compound **21** was characterized as 5-hydroxy-6-hydroxymethyl glucopiericidin A (**21**).

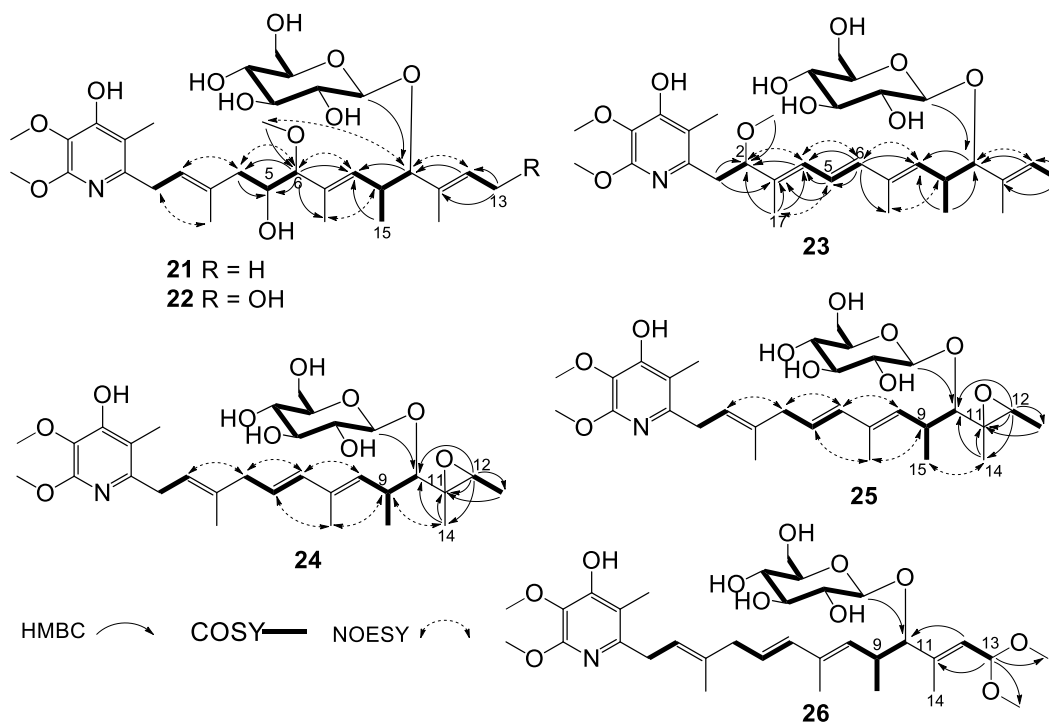

**Figure S13.** Key HMBC, COSY and NOESY correlations of **21–26**.

Compound **22** was obtained with its molecular formula  $\text{C}_{32}\text{H}_{51}\text{NO}_{12}$ , established by HR-ESIMS ( $m/z$  642.3481  $[\text{M} + \text{H}]^+$ ). The NMR data (**Tables S14, S15**) of **22** were similar to those of **21**, except for the replacement of the 13-Me in **21** by an oxygenated methylene in **22**, which was confirmed by the HMBC correlations from  $\text{H}_2$ -13 (4.05, dd,  $J = 12.8, 6.0$  Hz; 4.18, dd,  $J = 12.8, 6.0$  Hz) to C-11 ( $\delta_{\text{C}}$  139.0) and C-12 ( $\delta_{\text{C}}$  129.2), and COSY correlations of  $\text{H}_2$ -13/H-12 ( $\delta_{\text{H}}$  5.58, t,  $J = 6.3$  Hz) (**Figure S13**). All the configurations were determined by the NOESY correlations, coupling constants, as well as a biosynthetic point of view. Thus, compound **22** was characterized as 5-hydroxy-6-hydroxymethyl-13-hydroxyglucopiericidin A (**22**).

Compound **23** was obtained with its molecular formula  $\text{C}_{32}\text{H}_{49}\text{NO}_{10}$ , established by HR-ESIMS ( $m/z$  608.3444  $[\text{M} + \text{H}]^+$ ). Comparison of its  $^1\text{H}$  and  $^{13}\text{C}$  NMR data with those of glucopiericidin A (**10**) indicated that they shared the piericidin glycoside skeleton, but there were some differences with the chemical shifts on position 1–6 of the side chain (**Tables S14, S15**), together with an additional hydroxymethyl group. The hydroxymethyl was linked on C-2, and the conventional C-2/C-3 double bond was moved to C-3/C-4 here. This usual moiety in piericidins were clearly determined by the HMBC correlations from  $\text{H}_2$ -1 ( $\delta_{\text{H}}$  2.97, dd,  $J = 13.7, 8.6$  Hz; 2.73, dd,  $J = 13.7, 8.6$  Hz), H-4 ( $\delta_{\text{H}}$  5.93, d,  $J = 10.9$  Hz),  $\text{H}_3$ -17 ( $\delta_{\text{H}}$  1.79, s),  $\text{H}_3$ -(2-OMe) ( $\delta_{\text{H}}$  3.16, s) to C-2 ( $\delta_{\text{C}}$  88.0), from  $\text{H}_2$ -1, H-5 ( $\delta_{\text{H}}$  6.35, dd,  $J = 5.2, 10.9$  Hz),  $\text{H}_3$ -17 to C-3 ( $\delta_{\text{C}}$  136.9), from H-5, H-6 ( $\delta_{\text{H}}$  6.21, d,  $J = 15.2$  Hz),  $\text{H}_3$ -17 to C-4 ( $\delta_{\text{C}}$  129.8), and COSY correlations of  $\text{H}_2$ -1/H-2 ( $\delta_{\text{H}}$  4.08, t,  $J = 8.6$  Hz), and H-4/H-5/H-6 (**Figure S13**). The NMR data (**Tables S14, S15**), especially the coupling constants of the protons in the sugar group,

indicated the presence of a  $\beta$ -D-glucose group in **23**. The configurations of the double bonds in side chain and C-9/C-10 were deduced by the NOESY correlations and coupling constants, as illuminated in other piericidins above. The absolute configuration of C-2 was remained to be defined. Accordingly, compound **23** was characterized as 2-hydroxymethyl- $\Delta^3$ , 4-glucopiericidin A (**23**).

Compound **24** was obtained with its molecular formula  $C_{31}H_{47}NO_{10}$ , established by HRESIMS ( $m/z$  594.3269  $[M + H]^+$ ). Comparison of its  $^1H$  and  $^{13}C$  NMR data with those of **10** indicated that they shared the piericidin glycoside skeleton. The only difference was the replacement of the C-11/C-12 olefinic methines in **10** by C-11/C-12 epoxy ring in **24**, which was confirmed by the HRESIMS and HMBC correlations like from H-12 ( $\delta_H$  2.97 q,  $J = 5.5$  Hz) to C-10 ( $\delta_C$  86.1), C-11 ( $\delta_C$  61.2), C-13 ( $\delta_C$  13.1), and C-14 ( $\delta_C$  13.4) (**Figure S13**). Comparison of its NMR data with those of piericidin C1 (**7**) indicated that **24** was the 10-*O*-glucoside of piericidin C1. The configurations of the glucose, double bonds in side chain and C-9/C-10 were deduced by the NOESY correlations and coupling constants, as illuminated in other piericidins above. The NOESY correlations from H-9 to H-14 suggested the same side of the H-9 and CH<sub>3</sub>-14 (**Figure S13**). So the configurations of the C-11/C-12 epoxy ring were determined to be 11*S*, 12*R*. So, compound **24** was characterized as (11*S*, 12*R*) piericidin C1 10-*O*- $\beta$ -D-glucoside (**24**).

Compound **25** was obtained with its molecular formula  $C_{31}H_{47}NO_{10}$ , established by HRESIMS ( $m/z$  594.3288  $[M + H]^+$ ). The NMR data (**Table S14, S15**) of **25** were similar to those of **24**, except for some small difference of the chemical shifts of CH-10, C-11, CH-12, CH<sub>3</sub>-13, and CH<sub>3</sub>-14. The HMBC and COSY correlations revealed **25** had the same planer structure with **24**, including the C-11/C-12 epoxy ring. The differences of the specific rotations (**24**:  $[\alpha]_D^{20} + 2.0$ ,  $c$  0.6,  $CHCl_3$ ; **25**:  $[\alpha]_D^{20} + 0.9$ ,  $c$  0.6,  $CHCl_3$ ) and ECD curves (**Figure S14**) suggested **25** to be a C-11/C-12 epimer of **24**. The NOESY correlations from H<sub>3</sub>-15 ( $\delta_H$  0.91, d,  $J = 6.9$  Hz) to H-14 suggested the same side of the H<sub>3</sub>-15 and CH<sub>3</sub>-14 (**Figure S13**). So the configurations of the C-11/C-12 epoxy ring were determined to be 11*R*, 12*S*. Accordingly, compound **25** was characterized as (11*R*, 12*S*) piericidin C1 10-*O*- $\beta$ -D-glucoside (**25**).

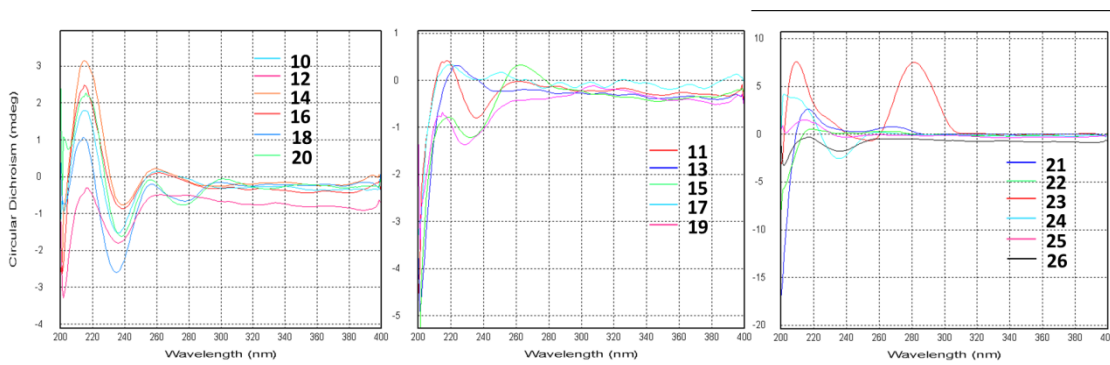

**Figure S14.** ECD spectrum of **10–26**.

Compound **26** was obtained with its molecular formula  $C_{33}H_{51}NO_{11}$ , established by HRESIMS ( $m/z$  638.3535  $[M + H]^+$ ). Comparison of its  $^1H$  and  $^{13}C$  NMR data with those of **11** indicated that they shared the piericidin glycoside skeleton (**Tables S14, S15**). The only difference was the replacement of the C-13 oxygenated CH<sub>2</sub> in **11** by oxygenated CH ( $\delta_H$  5.06, d,  $J = 6.5$  Hz,  $\delta_C$  101.5) in **26**, which was confirmed by the coupling constant of CH-12 ( $\delta_H$  5.46, d,  $J = 6.5$  Hz). The chemical shifts of CH-13 and the molecular formula suggested two methoxy groups linked on C-13, which were supported

by HMBC correlations from H-13 to C-11 ( $\delta_C$  142.9) and –OMe ( $\delta_C$  52.0) and COSY correlation from H-13 and H-12 (**Figure S13**). Thus, compound **26** was characterized as 13-dimethoxy glucopiericidin A (**26**).

Compound **27** was obtained with its molecular formula  $C_{30}H_{45}NO_8$ , established by HRESIMS ( $m/z$  548.3215  $[M + H]^+$ ). It was determined to be glucopiericidin C (**27**) by comparison of its  $^1H$  and  $^{13}C$  NMR data with literature data.<sup>[1b]</sup>

#### Methods of the Glycosides Hydrolyzation.

Compound **11** (5.0 mg) was refluxed with 2 M HCl/MeOH (1:1, 5 mL) for 6 h at 60 °C. The reaction mixture was evaporated to dryness and diluted with H<sub>2</sub>O (5 mL). After extraction with EtOAc (3 × 5 mL), the aqueous layer was concentrated and heated with L-cysteine methyl ester hydrochloride (5 mg) in pyridine (1 mL) at 60 °C for 1 h.<sup>[1]</sup> Then *O*-tolyl isothiocyanate (0.4 mL) was added to the reaction mixture, which was then stirred at 60 °C for 1 h. Sugar (D-glucose/D-galactose) standards (Sigma) were also derivatized using L-cysteine methyl ester hydrochloride in the same manner. Then *O*-tolyl isothiocyanate was added to the reaction mixture, stirred at 60 °C for 1 h. The reaction mixtures were analyzed by using HPLC under the followed conditions: an YMC-Pack ODS-A column (250 × 4.6 mm); a UV detector; CH<sub>3</sub>CN/H<sub>2</sub>O mobile phase (25/75, v/v); a detection wavelength of 250 nm; 0.8 mL/min flow rate. The retention times of the derivatized standards were as follow: D-glucose 21.5 min, D-galactose 19.0 min. By comparing the retention times with those of the standards, the sugar in compound **11** was determined to be D-glucose.<sup>[11]</sup> Hydrolyzation of **12** (0.8 mg) and **16** (1.0 mg) were taken in the same way, and only D-glucose was determined in the reaction mixtures.

NMR tube degradation method for sugar analysis of **14** (1.0 mg) was taken as reported.<sup>[8]</sup> Briefly, after measuring the  $^1H$  NMR spectrum (700 MHz, in DMSO-*d*<sub>6</sub>) of **14**, 2 M DCl/D<sub>2</sub>O (Deuterium Chloride) was added into the NMR tube and heated to 90 °C for 3 h. The  $^1H$  NMR spectrum (700 MHz) of the mixture in the tube was acquired after the hydrolyzation. The mixture of D-glucose and D-galactose was also measured in DMSO-*d*<sub>6</sub> with a little D<sub>2</sub>O. D-Glucose and D-galactose were determined in the degradation mixture of **14**, comparing with the anomeric protons of the hydrolysis products and those of sugar (D-glucose/D-galactose) standards acquired and in reference.<sup>[8]</sup>

**Table S11.**  $^1H$  NMR (700 MHz) Spectroscopic Data for **2-5**.

|    | <b>2</b> (CDCl <sub>3</sub> ) | <b>3</b> (CD <sub>3</sub> OD) | <b>3</b> (CDCl <sub>3</sub> ) | <b>4</b> (CDCl <sub>3</sub> ) | <b>5</b> (CDCl <sub>3</sub> ) |
|----|-------------------------------|-------------------------------|-------------------------------|-------------------------------|-------------------------------|
| 1  | 3.37 (d, 6.9) 2H              | 3.38 (d, 6.9) 2H              | 3.38 (d, 6.8) 2H              | 3.38 (d, 6.9) 2H              | 3.36 (d, 6.9) 2H              |
| 2  | 5.41 (t, 6.9)                 | 5.33 (t, 6.9)                 | 5.41 (t, 6.9)                 | 5.41 (t, 6.9)                 | 5.40 (t, 6.9)                 |
| 4  | 2.79 (d, 7.0) 2H              | 2.70 (s) 2H                   | 2.70 (s) 2H                   | 2.70 (s) 2H                   | 2.77 (d, 6.9) 2H              |
| 5  | 5.60 (dt, 15.5, 7.0)          | /                             | /                             | /                             | 5.59 (m)                      |
| 6  | 6.08 (d, 15.5)                | 5.68 (s)                      | 5.69 (s)                      | 5.69 (s)                      | 6.03 (d, 15.5)                |
| 8  | 5.21 (d, 9.8)                 | 5.16 (d, 9.4)                 | 5.06 (d, 9.9)                 | 5.06 (d, 9.9)                 | 5.35 (d, 9.6)                 |
| 9  | 2.56 (m)                      | 2.66 (m)                      | 2.65 (m)                      | 2.65 (m)                      | 4.14 (m)                      |
| 10 | 3.75 (dd, 7.6, 7.6)           | 3.66 *                        | 3.59 (d, 8.7)                 | 3.61 (d, 8.5)                 | /                             |
| 11 | 5.46 (dd, 7.6, 15.2)          | /                             | /                             | /                             | /                             |
| 12 | 5.70 (dq, 15.2, 6.4)          | 5.46 (s)                      | 5.46 (s)                      | 5.43 (s)                      | 6.73 (q, 7.0)                 |
| 13 | 1.72 (d, 6.4)                 | /                             | /                             | /                             | 1.84 (d, 6.9) 3H              |
| 14 | /                             | 1.87 (s) 3H                   | 1.91 (s) 3H                   | 1.92 (s) 3H                   | 1.77 (s) 3H                   |
| 15 | 0.92 (d, 6.8) 3H              | 0.90 (d, 6.9) 3H              | 0.87 (d, 6.7) 3H              | 0.89 (d, 6.7) 3H              | 1.15 (d, 6.8) 3H              |



|    |             |                  |                  |                  |             |
|----|-------------|------------------|------------------|------------------|-------------|
| 16 | 1.77 (s) 3H | 1.73 (s) 3H      | 1.78 (s) 3H      | 1.78 (s) 3H      | 1.79 (s) 3H |
| 17 | 1.75 (s) 3H | 1.68 (s) 3H      | 1.68 (s) 3H      | 1.68 (s) 3H      | 1.73 (s) 3H |
| 18 | /           | 1.68 (s) 3H      | 1.67 (s) 3H      | 1.67 (s) 3H      | /           |
| 19 | /           | 3.66 *           | 3.83 (q, 6.4)    | 3.77 (q, 6.3)    | /           |
| 20 | /           | 1.28 (s) 3H      | 1.29 (s) 3H      | 1.27 (s) 3H      | /           |
| 21 | /           | 1.14 (d, 6.4) 3H | 1.14 (d, 6.4) 3H | 1.15 (d, 6.4) 3H | /           |
| 7' | 3.95 (s) 3H | 3.91 (s) 3H      | 3.95 (s) 3H      | 3.95 (s) 3H      | 3.94 (s) 3H |
| 8' | 3.86 (s) 3H | 3.68 (s) 3H      | 3.86 (s) 3H      | 3.86 (s) 3H      | 3.86 (s) 3H |
| 9' | 2.09 (s) 3H | 2.06 (s) 3H      | 2.09 (s) 3H      | 2.09 (s) 3H      | 2.09 (s) 3H |

\* overlapped

**Table S12.**  $^{13}\text{C}$  NMR (175 MHz) Spectroscopic Data for **2-5**.

|    | <b>2</b> (CDCl <sub>3</sub> ) | <b>3</b> (CD <sub>3</sub> OD) | <b>3</b> (CDCl <sub>3</sub> ) | <b>4</b> (CDCl <sub>3</sub> ) | <b>5</b> (CDCl <sub>3</sub> ) |
|----|-------------------------------|-------------------------------|-------------------------------|-------------------------------|-------------------------------|
| 1  | 34.7, CH <sub>2</sub>         | 35.3, CH <sub>2</sub>         | 34.7, CH <sub>2</sub>         | 34.7, CH <sub>2</sub>         | 34.5, CH <sub>2</sub>         |
| 2  | 122.5, CH                     | 124.8, CH                     | 123.8, CH                     | 123.8, CH                     | 122.3, CH                     |
| 3  | 135.1, C                      | 135.0, C                      | 133.9, C                      | 134.0, C                      | 134.9, C                      |
| 4  | 43.4, CH <sub>2</sub>         | 49.8, CH <sub>2</sub>         | 51.1, CH <sub>2</sub>         | 51.3, CH <sub>2</sub>         | 43.2, CH <sub>2</sub>         |
| 5  | 127.0, CH                     | 134.6, C                      | 134.9, C                      | 134.9, C                      | 126.9, CH                     |
| 6  | 136.1, CH                     | 131.9, CH                     | 130.9, CH                     | 130.9, CH                     | 135.7, CH                     |
| 7  | 136.0, C                      | 134.2, C                      | 136.2, C                      | 136.1, C                      | 133.7, C                      |
| 8  | 132.8, CH                     | 133.7, CH                     | 130.1, CH                     | 130.1, CH                     | 131.3, CH                     |
| 9  | 39.7, CH                      | 37.5, CH                      | 37.1, CH                      | 37.0, CH                      | 39.7, CH                      |
| 10 | 77.5, CH                      | 84.5, CH                      | 83.3, CH                      | 83.1, CH                      | 203.4, C                      |
| 11 | 132.2, CH                     | 140.2, CH                     | 139.3, CH                     | 139.5, CH                     | 137.8, C                      |
| 12 | 129.1, CH                     | 131.6, CH                     | 132.8, CH                     | 132.0, CH                     | 137.1, CH                     |
| 13 | 18.1, CH <sub>3</sub>         | 76.5, C                       | 75.9, C                       | 75.8, C                       | 15.0, CH <sub>3</sub>         |
| 14 | /                             | 12.8, CH <sub>3</sub>         | 12.2, CH <sub>3</sub>         | 12.4, CH <sub>3</sub>         | 11.6, CH <sub>3</sub>         |
| 15 | 17.3, CH <sub>3</sub>         | 18.5, CH <sub>3</sub>         | 17.8, CH <sub>3</sub>         | 17.8, CH <sub>3</sub>         | 18.3, CH <sub>3</sub>         |
| 16 | 13.4, CH <sub>3</sub>         | 17.6, CH <sub>3</sub>         | 17.5, CH <sub>3</sub>         | 17.5, CH <sub>3</sub>         | 12.9, CH <sub>3</sub>         |
| 17 | 17.0, CH <sub>3</sub>         | 16.0, CH <sub>3</sub>         | 16.0, CH <sub>3</sub>         | 16.0, CH <sub>3</sub>         | 16.8, CH <sub>3</sub>         |
| 18 | /                             | 17.6, CH <sub>3</sub>         | 17.7, CH <sub>3</sub>         | 17.8, CH <sub>3</sub>         | /                             |
| 19 | /                             | 75.1, CH                      | 73.3, CH                      | 73.7, CH                      | /                             |
| 20 | /                             | 24.3, CH <sub>3</sub>         | 22.9, CH <sub>3</sub>         | 22.7, CH <sub>3</sub>         | /                             |
| 21 | /                             | 17.8, CH <sub>3</sub>         | 17.0, CH <sub>3</sub>         | 16.8, CH <sub>3</sub>         | /                             |
| 2' | 153.5, C                      | 156.0, C                      | 153.7, C                      | 153.7, C                      | 153.7, C                      |
| 3' | 127.8, C                      | 130.0, C                      | 127.9, C                      | 127.9, C                      | 127.9, C                      |
| 4' | 154.3, C                      | 156.7, C                      | 154.1, C                      | 154.1, C                      | 154.1, C                      |
| 5' | 111.8, C                      | 114.5, C                      | 112.1, C                      | 112.1, C                      | 112.1, C                      |
| 6' | 150.8, C                      | 150.3, C                      | 151.1, C                      | 151.1, C                      | 151.0, C                      |
| 7' | 53.3, CH <sub>3</sub>         | 52.0, CH <sub>3</sub>         | 53.2, CH <sub>3</sub>         | 53.2, CH <sub>3</sub>         | 53.2, CH <sub>3</sub>         |
| 8' | 61.0, CH <sub>3</sub>         | 60.8, CH <sub>3</sub>         | 60.8, CH <sub>3</sub>         | 60.8, CH <sub>3</sub>         | 60.8, CH <sub>3</sub>         |
| 9' | 10.8, CH <sub>3</sub>         | 10.9, CH <sub>3</sub>         | 10.6, CH <sub>3</sub>         | 10.6, CH <sub>3</sub>         | 10.6, CH <sub>3</sub>         |

**Table S13.** <sup>1</sup>H NMR (700 MHz) Spectroscopic Data for **12-19**.

|     | <b>12</b> (CD <sub>3</sub> OD) | <b>13</b> (DMSO- <i>d</i> <sub>6</sub> )     | <b>14</b> (DMSO- <i>d</i> <sub>6</sub> ) | <b>15</b> (DMSO- <i>d</i> <sub>6</sub> )     | <b>16</b> (DMSO- <i>d</i> <sub>6</sub> ) | <b>17</b> (DMSO- <i>d</i> <sub>6</sub> )     | <b>18</b> (DMSO- <i>d</i> <sub>6</sub> ) | <b>19</b> (CD <sub>3</sub> OD)               |
|-----|--------------------------------|----------------------------------------------|------------------------------------------|----------------------------------------------|------------------------------------------|----------------------------------------------|------------------------------------------|----------------------------------------------|
| 1   | 3.34 (d, 6.9) 2H               | 3.26 (d, 6.9) 2H                             | 3.28 (d, 6.9) 2H                         | 3.28 (d, 6.9) 2H                             | 3.28 (d, 6.9) 2H                         | 3.28 (d, 6.9) 2H                             | 3.34 *                                   | 3.40 (d, 6.9) 2H                             |
| 2   | 5.29 (t, 6.9)                  | 5.28 (t, 6.9)                                | 5.33 (t, 6.9)                            | 5.33 (t, 6.9)                                | 5.32 (t, 6.9)                            | 5.32 (t, 6.9)                                | 5.37 (t, 6.9)                            | 5.37 (t, 6.9)                                |
| 4   | 2.70 (d, 6.9) 2H               | 2.70 (d, 7.0) 2H                             | 2.74 (m) 2H                              | 2.74 (m) 2H                                  | 2.73 (m) 2H                              | 2.73 (m) 2H                                  | 2.75 (m) 2H                              | 2.77 (d, 7.0) 2H                             |
| 5   | 5.54 (dt, 13.9, 7.1)           | 5.54 (dt, 13.9, 7.0)                         | 5.54 (dt, 15.5, 7.3)                     | 5.44 (dt, 15.5, 7.3)                         | 5.45 (dt, 15.5, 7.1)                     | 5.47 (dt, 15.5, 7.1)                         | 5.47 (dt, 15.5, 7.1)                     | 5.54 (dt, 15.5, 7.1)                         |
| 6   | 6.04 *                         | 5.99 *                                       | 6.04 (d, 15.5)                           | 6.04 (d, 15.5)                               | 6.04 (d, 15.5)                           | 6.04 (d, 15.5)                               | 6.04 (d, 15.5)                           | 6.09 (d, 15.5)                               |
| 7   | 6.07 *                         | 6.02 *                                       | /                                        | /                                            | /                                        | /                                            |                                          |                                              |
| 8   | 5.79 (dd, 14.3, 7.1)           | 5.88 (dd, 14.4, 6.3)                         | 5.42 (d, 9.0)                            | 5.43 (d, 9.0)                                | 5.41 (d, 9.0)                            | 5.43 (d, 9.0)                                | 5.40 (d, 9.0)                            | 5.40 (d, 9.0)                                |
| 9   | 2.45 (m)                       | 2.37 (m)                                     | 2.66 (m)                                 | 2.67 (m)                                     | 2.66 (m)                                 | 2.67 (m)                                     | 2.67 (m)                                 | 2.81 (m)                                     |
| 10  | 3.66 (d, 8.9)                  | 3.60 *                                       | 3.73 (d, 7.1)                            | 3.74 (d, 7.0)                                | 3.73 (d, 7.2)                            | 3.75 (d, 7.0)                                | 3.76 (d, 8.9)                            | 3.75 (d, 8.9)                                |
| 12  | 6.46 (q, 6.7)                  | 5.43 (t, 6.3)                                | 5.36 (q, 6.8)                            | 5.42 (t, 6.3)                                | 5.37 (q, 6.8)                            | 5.42 (m)*                                    | 5.37 (q, 6.8)                            | 5.58 (t, 6.2)                                |
| 13  | 1.62 (d, 6.7) 3H               | 3.90 (dd, 13.0, 6.3)<br>3.98 (dd, 13.0, 6.3) | 1.56 (d, 6.8) 3H                         | 3.96 (dd, 13.0, 6.3)<br>4.00 (dd, 13.0, 6.3) | 1.56 (d, 6.8) 3H                         | 3.97 (dd, 13.0, 6.3)<br>4.01 (dd, 13.0, 6.3) | 1.55 (d, 6.8) 3H                         | 4.05 (dd, 12.8, 7.2)<br>4.17 (dd, 12.8, 7.2) |
| 14  | 1.60 (s) 3H                    | 1.52 (s) 3H                                  | 1.51 (s) 3H                              | 1.52 (s) 3H                                  | 1.51 (s) 3H                              | 1.53 (s) 3H                                  | 1.52 (s) 3H                              | 1.67 (s) 3H                                  |
| 15  | 0.85 (d, 6.9) 3H               | 0.82 (d, 6.9) 3H                             | 0.81 (d, 6.9) 3H                         | 0.83 (d, 6.9) 3H                             | 0.79 (d, 6.9) 3H                         | 0.82 (d, 6.9) 3H                             | 0.79 (d, 6.9) 3H                         | 0.88 (d, 6.9) 3H                             |
| 16  | /                              | /                                            | 1.65 (s) 3H                              | 1.66 (s) 3H                                  | 1.65 (s) 3H                              | 1.65 (s) 3H                                  | /                                        | 1.74 (s) 3H                                  |
| 17  | 1.74 (s) 3H                    | 1.69 (s) 3H                                  | 1.70 (s) 3H                              | 1.69 (s) 3H                                  | 1.69 (s) 3H                              | 1.70 (s) 3H                                  | 1.70 (s) 3H                              | 1.74 (s) 3H                                  |
| 7'  | 3.90 (s) 3H                    | 3.78 (s) 3H                                  | 3.81 (s) 3H                              | 3.81 (s) 3H                                  | 3.80 (s) 3H                              | 3.80 (s) 3H                                  | 3.83 (s) 3H                              | 3.92 (s) 3H                                  |
| 8'  | 3.73 (s) 3H                    | 3.62 (s) 3H                                  | 3.63 (s) 3H                              | 3.63 (s) 3H                                  | 3.63 (s) 3H                              | 3.62 (s) 3H                                  | 3.71 (s) 3H                              | 3.81 (s) 3H                                  |
| 9'  | 2.04 (s) 3H                    | 1.96 (s) 3H                                  | 1.98 (s) 3H                              | 1.98 (s) 3H                                  | 1.98 (s) 3H                              | 1.97 (s) 3H                                  | 2.07 (s) 3H                              | 2.15 (s) 3H                                  |
| 1'' | 4.20 (d, 7.8)                  | 4.07 (d, 7.8)                                | 4.09 (d, 7.8)                            | 4.11 (d, 8.0)                                | 4.10 (d, 7.8)                            | 4.12 (d, 7.8)                                | 4.08 (d, 7.8)                            | 4.24 (d, 7.8)                                |
| 2'' | 3.19 (d, 8.9, 7.8)             | 2.96 (dd, 8.7, 7.8)                          | 2.95 (dd, 8.8, 7.8)                      | 2.96 (dd, 8.8, 7.8)                          | 2.94 (dd, 8.8, 7.8)                      | 2.96 (dd, 8.8, 7.8)                          | 2.93 (m)*                                | 3.16 (m)*                                    |
| 3'' | 3.30 (dd, 8.9, 8.7)            | 3.10 (dd, 8.7, 8.6)                          | 3.11 (dd, 8.8, 8.8)                      | 3.10 (dd, 8.8, 8.8)                          | 3.10 (dd, 8.8, 8.8)                      | 3.12 (dd, 8.8, 8.8)                          | 3.22 (m)*                                | 3.32 (m)*                                    |
| 4'' | 3.29 (dd, 9.1, 8.7)            | 2.99 (m)*                                    | 3.00 (dd, 9.3, 8.8)                      | 3.02 (dd, 9.3, 8.8)                          | 3.02 (dd, 9.6, 8.8)                      | 3.04 (dd, 9.6, 8.8)                          | 3.03 (dd, 9.3, 9.0)                      | 3.22 (dd, 9.6, 8.8)                          |



|      |                           |           |                           |                           |                      |                      |                     |                           |
|------|---------------------------|-----------|---------------------------|---------------------------|----------------------|----------------------|---------------------|---------------------------|
| 5''  | 3.11 (ddd, 9.1, 5.3, 2.5) | 2.98 (m)* | 3.18 (ddd, 9.3, 5.3, 1.8) | 3.20 (ddd, 9.3, 5.3, 1.8) | 3.17 (m)             | 3.17 (m)             | 3.09 (m)*           | 3.26 (ddd, 9.6, 5.3, 1.8) |
| 6''  | 3.62 (dd, 11.8, 5.4)      | 3.36 *    | 3.48 (dd, 10.5, 1.8)      | 3.48 (dd, 10.5, 1.8)      | 3.50 (dd, 10.8, 1.8) | 3.50 (br.d 10.8)     | 3.62 (br.d 11.5)    | 3.67 (dd, 12.1, 5.3)      |
|      | 3.74 (dd, 11.8, 2.5)      | 3.60 *    | 3.58 (dd, 10.5, 5.3)      | 3.58 (dd, 10.5, 5.3)      | 3.60 (dd, 10.8, 6.0) | 3.62 (m) *           | 3.42 (m) *          | 3.79 (m) *                |
| 1''' | /                         | /         | 4.64, d (2.2)             | 4.64, d (2.9)             | 4.62, d (3.6)        | 4.64, d (3.6)        | 5.09 (d, 7.4)       | 5.23 (d, 7.4)             |
| 2''' | /                         | /         | 3.58 (m)*                 | 3.57 (m)*                 | 3.18 (dd, 8.9, 2.0)  | 3.18 (m)             | 3.21 (m)*           | 3.46 (m)*                 |
| 3''' | /                         | /         | 3.70 (br.s)               | 3.70 (br.s)               | 3.40 (m)             | 3.40 (m)             | 3.07 (m)*           | 3.46 (m)*                 |
| 4''' | /                         | /         | 3.58 (m)*                 | 3.56 (m)*                 | 3.10 (dd, 8.8, 8.8)  | 3.10 (dd, 8.8, 8.8)  | 3.12 (dd, 9.3, 9.0) | 3.40 (m)*                 |
| 5''' | /                         | /         | 3.62 (m)*                 | 3.61 (m)                  | 3.43 (m)             | 3.42 (m)             | 2.93 (m)*           | 3.16 (m)*                 |
| 6''' | /                         | /         | 3.43 (dd, 10.7, 6.3)      | 3.42 (dd, 10.7, 6.3)      | 3.46 (dd, 9.7, 6.6)  | 3.46 (dd, 11.6, 5.2) | 3.56 (br.d 11.5)    | 3.59 (dd, 11.9, 6.1)      |
|      |                           |           | 3.51 (dd, 10.7, 6.3)      | 3.51 (dd, 10.7, 6.3)      | 3.57 (br.d, 9.7)     | 3.58 (br.d, 11.6)    | 3.42 (m) *          | 3.79 (m) *                |

\* overlapped

**Table S14.** <sup>1</sup>H NMR (700 MHz) Spectroscopic Data for **20-26**.

|     | <b>20</b> (CD <sub>3</sub> OD) | <b>21</b> (CD <sub>3</sub> OD)           | <b>22</b> (CD <sub>3</sub> OD)           | <b>23</b> (CD <sub>3</sub> OD)               | <b>24</b> (CDCl <sub>3</sub> ) | <b>25</b> (CDCl <sub>3</sub> ) | <b>26</b> (CD <sub>3</sub> OD) |
|-----|--------------------------------|------------------------------------------|------------------------------------------|----------------------------------------------|--------------------------------|--------------------------------|--------------------------------|
| 1   | 3.39 (d, 6.9) 2H               | 3.38 (d, 6.8) 2H                         | 3.28 (d, 6.8) 2H                         | 2.97 (dd, 13.7, 8.6)<br>2.73 (dd, 13.7, 8.6) | 3.37 (d, 6.8) 2H               | 3.36 (d, 6.8) 2H               | 3.45 (d, 6.7) 2H               |
| 2   | 5.35 (t, 6.9)                  | 5.37 (t, 6.8)                            | 5.32 (t, 6.8)                            | 4.08 (t, 8.6)                                | 5.38 (t, 6.8)                  | 5.38 (t, 6.8)                  | 5.26 (t, 6.7)                  |
| 4   | 2.77 (d, 7.0) 2H               | 2.51(br.d, 13.9)<br>2.03 (dd, 13.9, 8.9) | 2.51(br.d, 14.0)<br>2.04 (dd, 14.0, 9.0) | 5.93 (d, 10.9)                               | 2.77 (d/, 6.9) 2H              | 2.77 (d, 6.9) 2H               | 2.78 (d, 6.9) 2H               |
| 5   | 5.54 (dt, 15.5, 6.9)           | 3.69 (ddd, 8.9, 8.4, 2.7)                | 3.68 (ddd, 9.0, 8.3, 2.7)                | 6.35 (dd, 15.2, 10.9)                        | 5.61 (dt, 15.6, 6.9)           | 5.63 (dt, 15.6, 6.9)           | 5.54 (dt, 15.6, 6.9)           |
| 6   | 6.09 (d, 15.5)                 | 3.20 (d, 8.4)                            | 3.21 (d, 8.3)                            | 6.21 (d, 15.2)                               | 6.03 (d, 15.6)                 | 6.04 (d, 15.6)                 | 6.08 (d, 15.6)                 |
| OMe | /                              | 3.11 (s) 3H                              | 3.13 (s) 3H                              | 3.16 (s) 3H                                  | /                              | /                              | 3.31 (s) 6H*                   |
| 8   | 5.41 (d, 9.0)                  | 5.30 (d, 9.3)                            | 5.31 (d, 9.3)                            | 5.52 (d, 9.2)                                | 5.26 (d, 9.8)                  | 5.21 (d, 9.8)                  | 5.41 (d, 9.5)                  |
| 9   | 2.80 (m)                       | 2.77 (m)                                 | 2.79 (m)                                 | 2.82 (m)                                     | 2.92 (m)                       | 2.73 (m)                       | 2.84 (m)                       |
| 10  | 3.75 (d, 7.0)                  | 3.60 (d, 9.3)                            | 3.62 (d, 9.3)                            | 3.74 *                                       | 3.11 (d, 6.6)                  | 2.70 (d, 9.5)                  | 3.83 (d, 6.9)                  |
| 12  | 5.48 (q, 6.7)                  | 5.47 (q, 6.6)                            | 5.58 (t, 6.3)                            | 5.48 (q, 6.5)                                | 2.97 (q, 5.5)                  | 2.87 (q, 5.5)                  | 5.46 (d, 6.5)                  |

|       |                                              |                                    |                                              |                                              |                          |                                              |                                              |
|-------|----------------------------------------------|------------------------------------|----------------------------------------------|----------------------------------------------|--------------------------|----------------------------------------------|----------------------------------------------|
| 13    | 1.64 (d, 6.8) 3H                             | 1.63 (d, 6.8) 3H                   | 4.05 (dd, 12.8, 6.0)<br>4.18 (dd, 12.8, 6.0) | 1.62 (d, 6.8) 3H                             | 1.22 (d, 5.5)            | 1.30 (d, 5.5)                                | 5.06 (d, 6.5)                                |
| 14    | 1.62 (s) 3H                                  | 1.60 (s) 3H                        | 1.61 (s) 3H                                  | 1.63 (s) 3H                                  | 1.27 (s) 3H              | 1.29 (s) 3H                                  | 1.73 (s) 3H                                  |
| 15    | 0.83 (d, 6.9) 3H                             | 0.79 (d, 6.9) 3H                   | 0.84 (d, 6.9) 3H                             | 0.83 (d, 6.9) 3H                             | 1.05 (d, 6.9) 3H         | 0.91 (d, 6.9) 3H                             | 0.96 (d, 6.9) 3H                             |
| 16    | 1.74 (s) 3H                                  | 1.64 (s) 3H                        | 1.69 (s) 3H                                  | 1.81 (s) 3H                                  | 1.77 (s) 3H              | 1.78 (s) 3H                                  | 1.76 (s) 3H                                  |
| 17    | 1.75 (s) 3H                                  | 1.82 (s) 3H                        | 1.82 (s) 3H                                  | 1.79 (s) 3H                                  | 1.74 (s) 3H              | 1.74 (s) 3H                                  | 1.73 (s) 3H                                  |
| 7'    | 3.92 (s) 3H                                  | 3.91 (s) 3H                        | 3.99 (s) 3H                                  | 3.91 (s) 3H                                  | 3.94 (s) 3H              | 3.95 (s) 3H                                  | 4.06 (s) 3H                                  |
| 8'    | 3.81 (s) 3H                                  | 3.73 (s) 3H                        | 3.76 (s) 3H                                  | 3.73 (s) 3H                                  | 3.85 (s) 3H              | 3.86 (s) 3H                                  | 3.80 (s) 3H                                  |
| 9'    | 1.90 (s) 3H                                  | 2.07 (s) 3H                        | 2.10 (s) 3H                                  | 2.07 (s) 3H                                  | 2.09(s) 3H               | 2.09(s) 3H                                   | 2.10(s) 3H                                   |
| 1''   | 4.25 (d, 7.8)                                | 4.16 (d, 7.9)                      | 4.19 (d, 7.8)                                | 4.21 (d, 7.9)                                | 4.30 (d, 7.8)            | 4.18 (d, 7.9)                                | 4.27 (d, 7.8)                                |
| 2''   | 3.16 (dd, 8.8, 7.8)                          | 3.10 (m)*                          | 3.11 (dd, 9.0, 7.8)                          | 3.13 (dd, 9.0, 7.8)                          | 3.27 (dd, 8.8, 7.8)      | 3.32 (dd, 8.8, 7.9)                          | 3.19 (dd, 9.0, 7.8)                          |
| 3''   | 3.32 (m)*                                    | 3.29 (m)*                          | 3.29 (dd, 9.0, 9.0)                          | 3.31 (dd, 9.0, 6.8)                          | 3.51 (dd, 8.8, 8.8)      | 3.50 (dd, 8.8, 8.8)                          | 3.34 (dd, 9.0, 8.7)                          |
| 4''   | 3.29 (m)*                                    | 3.27 (dd, 9.6, 8.8)                | 3.20 (dd, 9.8, 9.0)                          | 3.29 (dd, 9.2, 6.8)                          | 3.58 (dd, 9.6, 8.8)      | 3.39 (dd, 8.8, 8.7)                          | 3.27 (dd, 8.7, 8.7)                          |
| 5''   | 3.37 (m)                                     | 3.10 (m)*                          | 3.15 (m)                                     | 3.11 (ddd, 9.2, 5.2, 2.5)                    | 3.37 (m)*                | 3.44 (ddd, 8.7, 8.7, 2.8)                    | 3.16 (ddd, 8.7, 5.6, 2.3)                    |
| 6''   | 3.56 (dd, 10.7, 2.2)<br>3.94 (dd, 10.7, 4.2) | 3.62 (dd, 12.1, 5.3)<br>3.73 (m) * | 3.57 (dd, 11.7, 6.1)<br>3.79 (dd, 11.7, 2.0) | 3.63 (dd, 11.8, 5.2)<br>3.75 (dd, 11.8, 2.5) | 3.83 (m) *<br>3.87 (m) * | 3.63 (dd, 11.8, 8.7)<br>3.92 (dd, 11.8, 2.8) | 3.62 (dd, 11.8, 5.6)<br>3.77 (dd, 11.8, 2.3) |
| 1'''  | 4.84, d (3.2)                                | /                                  | /                                            | /                                            | /                        | /                                            | /                                            |
| 2'''  | 3.75 (m)*                                    | /                                  | /                                            | /                                            | /                        | /                                            | /                                            |
| 3'''  | 3.90 (br.d, 1.8)                             | /                                  | /                                            | /                                            | /                        | /                                            | /                                            |
| 4'''  | 3.75 (m)*                                    | /                                  | /                                            | /                                            | /                        | /                                            | /                                            |
| 5'''  | 3.86 (m)*                                    | /                                  | /                                            | /                                            | /                        | /                                            | /                                            |
| 6'''  | 3.68 (dd, 10.7, 6.5)<br>3.80 (dd, 10.7, 2.3) | /                                  | /                                            | /                                            | /                        | /                                            | /                                            |
| 1'''' | 5.23 (d, 7.5)                                | /                                  | /                                            | /                                            | /                        | /                                            | /                                            |
| 2'''' | 3.46 (m)*                                    | /                                  | /                                            | /                                            | /                        | /                                            | /                                            |
| 3'''' | 3.37 (m)*                                    | /                                  | /                                            | /                                            | /                        | /                                            | /                                            |

|       |                           |   |   |   |   |   |   |
|-------|---------------------------|---|---|---|---|---|---|
| 4'''' | 3.42 (m)*                 | / | / | / | / | / | / |
| 5'''' | 3.25 (ddd, 9.6, 5.3, 2.3) | / | / | / | / | / | / |
| 6'''' | 3.68 (dd, 10.7, 5.3)      | / | / | / | / | / | / |
|       | 3.80 (m)*                 |   |   |   |   |   |   |

\* overlapped

**Table S15.** <sup>13</sup>C NMR (175 MHz) Spectroscopic Data for **12-26**.

|     | <b>12</b> <sup>a</sup> | <b>13</b> <sup>b</sup> | <b>14</b> <sup>b</sup> | <b>15</b> <sup>b</sup> | <b>16</b> <sup>b</sup> | <b>17</b> <sup>b</sup> | <b>18</b> <sup>b</sup> | <b>19</b> <sup>a</sup> | <b>20</b> <sup>a</sup> | <b>21</b> <sup>a</sup> | <b>22</b> <sup>a</sup> | <b>23</b> <sup>a</sup> | <b>24</b> <sup>c</sup> | <b>25</b> <sup>c</sup> | <b>26</b>             |
|-----|------------------------|------------------------|------------------------|------------------------|------------------------|------------------------|------------------------|------------------------|------------------------|------------------------|------------------------|------------------------|------------------------|------------------------|-----------------------|
| 1   | 35.3, CH <sub>2</sub>  | 34.2, CH <sub>2</sub>  | 34.1, CH <sub>2</sub>  | 34.0, CH <sub>2</sub>  | 34.0, CH <sub>2</sub>  | 34.2, CH <sub>2</sub>  | 34.0, CH <sub>2</sub>  | 35.5, CH <sub>2</sub>  | 35.5, CH <sub>2</sub>  | 35.3, CH <sub>2</sub>  | 36.0, CH <sub>2</sub>  | 39.9, CH <sub>2</sub>  | 34.6, CH <sub>2</sub>  | 34.6, CH <sub>2</sub>  | 33.8, CH <sub>2</sub> |
| 2   | 123.6, CH              | 122.4, CH              | 121.6, CH              | 121.9, CH              | 121.8, CH              | 122.3, CH              | 121.6, CH              | 123.1, CH              | 123.1, CH              | 125.4, CH              | 124.4, CH              | 88.0, CH               | 122.5, CH              | 122.5, CH              | 121.8, CH             |
| 3   | 135.6, C               | 133.8, C               | 132.2, C               | 132.2, C               | 132.1, C               | 132.2, C               | 132.5, C               | 134.8, C               | 134.6, C               | 134.3, C               | 134.6, C               | 136.9, C               | 134.0, C               | 134.8, C               | 137.4, C              |
| 4   | 43.8, CH <sub>2</sub>  | 42.1, CH <sub>2</sub>  | 42.5, CH <sub>2</sub>  | 42.5, CH <sub>2</sub>  | 42.5, CH <sub>2</sub>  | 42.4, CH <sub>2</sub>  | 42.5, CH <sub>2</sub>  | 44.1, CH <sub>2</sub>  | 44.1, CH <sub>2</sub>  | 43.2, CH <sub>2</sub>  | 45.1, CH <sub>2</sub>  | 129.8, CH              | 43.1, CH               | 43.2, CH               | 43.9, CH              |
| 5   | 133.3, CH              | 128.8, CH              | 122.0, CH              | 124.7, CH              | 121.9, CH              | 124.7, CH              | 121.8, CH              | 126.6, CH              | 126.5, CH              | 70.1, CH               | 70.1, CH               | 123.0, CH              | 127.2, CH              | 127.7, CH              | 126.3, CH             |
| 6   | 132.0, CH              | 129.5, CH              | 136.1, CH              | 136.2, CH              | 136.2, CH              | 136.1, CH              | 136.2, CH              | 137.4, CH              | 137.4, CH              | 92.3, CH               | 92.4, CH               | 139.1, CH              | 135.4, CH              | 135.0, CH              | 137.6, CH             |
| OMe | /                      | /                      | /                      | /                      | /                      | /                      | /                      | /                      | /                      | 56.0, CH <sub>3</sub>  | 56.0, CH <sub>3</sub>  | 56.3, CH <sub>3</sub>  | /                      | /                      | 52.0, CH <sub>3</sub> |
| 7   | 131.0, CH              | 131.9, CH              | 135.4, C               | 134.9, C               | 135.3, C               | 134.8, C               | 135.4, C               | 136.1, C               | 136.2, C               | 133.1, C               | 133.4, C               | 135.2, C               | 134.8, C               | 134.9, C               | 134.3, C              |
| 8   | 137.0, CH              | 135.8, CH              | 134.7, CH              | 134.5, CH              | 134.8, CH              | 134.6, CH              | 134.9, CH              | 135.5, CH              | 135.9, CH              | 137.5, CH              | 137.0, CH              | 138.4, CH              | 132.7, CH              | 133.5, CH              | 134.8, CH             |
| 9   | 40.3, CH               | 38.0, CH               | 35.6, CH               | 35.5, CH               | 35.4, CH               | 35.4, CH               | 35.2, CH               | 36.8, CH               | 36.8, CH               | 36.1, CH               | 36.0, CH               | 37.0, CH               | 35.8, CH               | 36.1, CH               | 36.9, CH              |
| 10  | 93.7, CH               | 90.0, CH               | 89.8, CH               | 89.2, CH               | 89.6, CH               | 89.2, CH               | 89.5, CH               | 93.1, CH               | 93.9, CH               | 94.2, CH               | 93.6, CH               | 93.8, CH               | 86.1, CH               | 93.4, CH               | 91.7, CH              |
| 11  | 137.1, C               | 135.4, C               | 134.2, C               | 134.3, C               | 134.3, C               | 134.0, C               | 134.6, C               | 139.1, C               | 136.5, C               | 136.5, C               | 139.0, C               | 136.7, C               | 61.2, C                | 61.4, C                | 142.9, CH             |
| 12  | 124.2, CH              | 128.7, CH              | 124.7, CH              | 128.8, CH              | 124.6, CH              | 129.0, CH              | 124.6, CH              | 128.8, CH              | 124.8, CH              | 124.6, CH              | 129.2, CH              | 124.5, CH              | 57.3, CH               | 57.9, CH               | 125.9, CH             |
| 13  | 13.2, CH <sub>3</sub>  | 57.2, CH <sub>2</sub>  | 13.0, CH <sub>3</sub>  | 57.4, CH <sub>2</sub>  | 13.1, CH <sub>3</sub>  | 57.5, CH <sub>2</sub>  | 13.0, CH <sub>3</sub>  | 59.0, CH <sub>2</sub>  | 13.1, CH <sub>3</sub>  | 13.2, CH <sub>3</sub>  | 59.0, CH <sub>2</sub>  | 13.0, CH <sub>3</sub>  | 13.1, CH <sub>3</sub>  | 13.3, CH <sub>3</sub>  | 101.5, CH             |
| 14  | 11.7, CH <sub>3</sub>  | 12.0, CH <sub>3</sub>  | 11.8, CH <sub>3</sub>  | 12.2, CH <sub>3</sub>  | 11.9, CH <sub>3</sub>  | 12.3, CH <sub>3</sub>  | 11.9, CH <sub>3</sub>  | 12.0, CH <sub>3</sub>  | 11.8, CH <sub>3</sub>  | 11.4, CH <sub>3</sub>  | 11.9, CH <sub>3</sub>  | 11.9, CH <sub>3</sub>  | 13.4, CH <sub>3</sub>  | 11.7, CH <sub>3</sub>  | 13.5, CH <sub>3</sub> |
| 15  | 17.0, CH <sub>3</sub>  | 15.9, CH <sub>3</sub>  | 17.6, CH <sub>3</sub>  | 17.5, CH <sub>3</sub>  | 17.6, CH <sub>3</sub>  | 17.5, CH <sub>3</sub>  | 17.4, CH <sub>3</sub>  | 17.8, CH <sub>3</sub>  | 17.8, CH <sub>3</sub>  | 17.7, CH <sub>3</sub>  | 17.6, CH <sub>3</sub>  | 17.6, CH <sub>3</sub>  | 14.4, CH <sub>3</sub>  | 17.1, CH <sub>3</sub>  | 18.0, CH <sub>3</sub> |
| 16  | /                      | /                      | 16.4, CH <sub>3</sub>  | 12.3, CH <sub>3</sub>  | 12.0, CH <sub>3</sub>  | 11.3, CH <sub>3</sub>  | 11.3, CH <sub>3</sub>  | 13.2, CH <sub>3</sub>  | 13.6, CH <sub>3</sub>  | 13.4, CH <sub>3</sub>  | 13.1, CH <sub>3</sub> |
| 17  | 16.7, CH <sub>3</sub>  | 16.4, CH <sub>3</sub>  | 12.7, CH <sub>3</sub>  | 12.7, CH <sub>3</sub>  | 12.7, CH <sub>3</sub>  | 12.7, CH <sub>3</sub>  | 12.6, CH <sub>3</sub>  | 16.7, CH <sub>3</sub>  | 16.7, CH <sub>3</sub>  | 17.2, CH <sub>3</sub>  | 17.2, CH <sub>3</sub>  | 11.9, CH <sub>3</sub>  | 16.7, CH <sub>3</sub>  | 16.8, CH <sub>3</sub>  | 16.7, CH <sub>3</sub> |
| 2'  | 156.1, C               | 154.3, C               | 155.3, C               | 157.1, C               | 157.1, C               | 156.2, C               | 155.9, C               | 160.0, C               | 154.2, C               | 154.1, C               | 155.7, C              |

|       |                       |                       |                       |                       |                       |                       |                       |                       |                       |                       |                       |                       |                       |                       |                       |
|-------|-----------------------|-----------------------|-----------------------|-----------------------|-----------------------|-----------------------|-----------------------|-----------------------|-----------------------|-----------------------|-----------------------|-----------------------|-----------------------|-----------------------|-----------------------|
| 3'    | 130.4, C              | 128.5, C              | 128.4, C              | 128.3, C              | 128.3, C              | 128.6, C              | 132.1, C              | 134.4, C              | 134.4, C              | 129.6, C              | 129.9, C              | 130.4, C              | 128.0, C              | 127.7, C              | 131.3, C              |
| 4'    | 158.6, C              | 157.6, C              | 155.5, C              | 155.1, C              | 155.2, C              | 156.3, C              | 154.3, C              | 155.9, C              | 155.9, C              | 156.6, C              | 159.8, C              | 158.2, C              | 153.7, C              | 153.7, C              | 162.6, C              |
| 5'    | 115.0, C              | 113.1, C              | 112.9, C              | 112.7, C              | 112.7, C              | 113.1, C              | 118.1, C              | 120.0, C              | 120.0, C              | 118.3, C              | 117.9, C              | 116.3, C              | 112.2, C              | 112.2, C              | 116.3, C              |
| 6'    | 151.3, C              | 149.5, C              | 149.6, C              | 149.7, C              | 149.7, C              | 149.4, C              | 149.8, C              | 152.1, C              | 152.1, C              | 151.2, C              | 150.9, C              | 148.4, C              | 134.0, C              | 151.0, C              | 149.7, C              |
| 7'    | 53.9, CH <sub>3</sub> | 52.4, CH <sub>3</sub> | 52.5, CH <sub>3</sub> | 52.5, CH <sub>3</sub> | 52.5, CH <sub>3</sub> | 52.5, CH <sub>3</sub> | 52.8, CH <sub>3</sub> | 53.4, CH <sub>3</sub> | 53.7, CH <sub>3</sub> | 53.7, CH <sub>3</sub> | 53.9, CH <sub>3</sub> | 53.8, CH <sub>3</sub> | 53.2, CH <sub>3</sub> | 53.3, CH <sub>3</sub> | 56.6, CH <sub>3</sub> |
| 8'    | 60.8, CH <sub>3</sub> | 59.9, CH <sub>3</sub> | 60.0, CH <sub>3</sub> | 60.0, CH <sub>3</sub> | 60.0, CH <sub>3</sub> | 59.9, CH <sub>3</sub> | 60.2, CH <sub>3</sub> | 61.2, CH <sub>3</sub> | 61.2, CH <sub>3</sub> | 60.8, CH <sub>3</sub> | 61.1, CH <sub>3</sub> | 60.8, CH <sub>3</sub> | 60.8, CH <sub>3</sub> | 60.8, CH <sub>3</sub> | 61.3, CH <sub>3</sub> |
| 9'    | 10.9, CH <sub>3</sub> | 10.6, CH <sub>3</sub> | 10.6, CH <sub>3</sub> | 10.6, CH <sub>3</sub> | 10.5, CH <sub>3</sub> | 10.7, CH <sub>3</sub> | 11.4, CH <sub>3</sub> | 13.2, CH <sub>3</sub> | 13.3, CH <sub>3</sub> | 11.0, CH <sub>3</sub> | 10.8, CH <sub>3</sub> | 11.2, CH <sub>3</sub> | 10.6, CH <sub>3</sub> | 10.6, CH <sub>3</sub> | 10.7, CH <sub>3</sub> |
| 1''   | 104.2, CH             | 102.7, CH             | 102.5, CH             | 102.4, CH             | 102.2, CH             | 102.2, CH             | 102.0, CH             | 104.2, CH             | 104.0, CH             | 104.2, CH             | 104.6, CH             | 104.1, CH             | 103.8, CH             | 104.4, CH             | 105.1, CH             |
| 2''   | 75.7, CH              | 74.1, CH              | 74.2, CH              | 74.1, CH              | 74.1, CH              | 74.2, CH              | 74.3, CH              | 75.7, CH              | 75.8, CH              | 75.4, CH              | 75.3, CH              | 75.7, CH              | 73.2, CH              | 74.7, CH              | 75.7, CH              |
| 3''   | 78.3, CH              | 77.1, CH              | 76.8, CH              | 76.9, CH              | 76.9, CH              | 77.0, CH              | 76.5, CH              | 77.9, CH              | 78.0, CH              | 78.0, CH              | 78.1, CH              | 78.3, CH              | 76.1, CH              | 77.7, CH              | 78.1, CH              |
| 4''   | 71.6, CH              | 70.2, CH              | 70.4, CH              | 70.4, CH              | 70.3, CH              | 70.3, CH              | 70.0, CH              | 71.7, CH              | 71.7, CH              | 71.6, CH              | 71.8, CH              | 71.5, CH              | 70.4, CH              | 71.4, CH              | 71.5, CH              |
| 5''   | 77.7, CH              | 76.8, CH              | 75.2, CH              | 75.1, CH              | 75.1, CH              | 75.1, CH              | 77.4, CH              | 78.3, CH              | 78.2, CH              | 77.6, CH              | 77.8, CH              | 77.7, CH              | 75.5, CH              | 76.2, CH              | 77.9, CH              |
| 6''   | 62.8, CH <sub>2</sub> | 61.8, CH <sub>2</sub> | 67.2, CH <sub>2</sub> | 67.1, CH <sub>2</sub> | 67.3, CH <sub>2</sub> | 67.2, CH <sub>2</sub> | 60.8, CH <sub>2</sub> | 62.5, CH <sub>2</sub> | 67.2, CH <sub>2</sub> | 62.8, CH <sub>2</sub> | 63.0, CH <sub>2</sub> | 62.7, CH <sub>2</sub> | 62.4, CH <sub>2</sub> | 63.2, CH <sub>2</sub> | 62.8, CH <sub>2</sub> |
| 1'''  | /                     | /                     | 99.0, CH              | 99.0, CH              | 98.8, CH              | 98.8, CH              | 102.7, CH             | 104.6, CH             | 100.3, CH             | /                     | /                     | /                     | /                     | /                     | /                     |
| 2'''  | /                     | /                     | 69.6, CH              | 69.6, CH              | 72.0, CH              | 72.0, CH              | 74.1, CH              | 75.6, CH              | 71.3, CH              | /                     | /                     | /                     | /                     | /                     | /                     |
| 3'''  | /                     | /                     | 68.9, CH              | 68.9, CH              | 72.3, CH              | 72.4, CH              | 76.9, CH              | 78.0, CH              | 70.5, CH              | /                     | /                     | /                     | /                     | /                     | /                     |
| 4'''  | /                     | /                     | 68.4, CH              | 68.4, CH              | 70.1, CH              | 70.1, CH              | 69.8, CH              | 71.4, CH              | 71.0, CH              | /                     | /                     | /                     | /                     | /                     | /                     |
| 5'''  | /                     | /                     | 70.8, CH              | 70.9, CH              | 73.2, CH              | 73.3, CH              | 70.0, CH              | 78.2, CH              | 72.2, CH              | /                     | /                     | /                     | /                     | /                     | /                     |
| 6'''  | /                     | /                     | 60.5, CH <sub>2</sub> | 60.5, CH <sub>2</sub> | 60.8, CH <sub>2</sub> | 60.9, CH <sub>2</sub> | 61.1, CH <sub>2</sub> | 62.9, CH <sub>2</sub> | 62.5, CH <sub>2</sub> | /                     | /                     | /                     | /                     | /                     | /                     |
| 1'''' | /                     | /                     | /                     | /                     | /                     | /                     | /                     | /                     | 104.2, CH             | /                     | /                     | /                     | /                     | /                     | /                     |
| 2'''' | /                     | /                     | /                     | /                     | /                     | /                     | /                     | /                     | 75.7, CH              | /                     | /                     | /                     | /                     | /                     | /                     |
| 3'''' | /                     | /                     | /                     | /                     | /                     | /                     | /                     | /                     | 76.5, CH              | /                     | /                     | /                     | /                     | /                     | /                     |
| 4'''' | /                     | /                     | /                     | /                     | /                     | /                     | /                     | /                     | 71.4, CH              | /                     | /                     | /                     | /                     | /                     | /                     |
| 5'''' | /                     | /                     | /                     | /                     | /                     | /                     | /                     | /                     | 78.4, CH              | /                     | /                     | /                     | /                     | /                     | /                     |
| 6'''' | /                     | /                     | /                     | /                     | /                     | /                     | /                     | /                     | 62.7, CH <sub>2</sub> | /                     | /                     | /                     | /                     | /                     | /                     |

<sup>a</sup> in CD<sub>3</sub>OD; <sup>b</sup> in DMSO-*d*<sub>6</sub>; <sup>c</sup> in CDCl<sub>3</sub>.

## References

- [1] a) S. Yoshida, K. Yoneyama, S. Shiraishi, A. Watanabe, N. Takahashi, *Agricultural and Biological Chemistry* **1977**, *41*, 855-862; b) K. A. Shaaban, E. Helmke, G. Kelter, H. H. Fiebig, H. Laatsch, *J Antibiot* **2011**, *64*, 205-209.
- [2] A. Urakawa, T. Sasaki, K. Yoshida, T. Otani, Y. Lei, W. Yun, *J Antibiot* **1996**, *49*, 1052-1055.
- [3] Y. Hayakawa, S. Shirasaki, T. Kawasaki, Y. Matsuo, K. Adachi, Y. Shizuri, *J Antibiot* **2007**, *60*, 201-203.
- [4] M. J. Schnermann, F. A. Romero, I. Hwang, E. Nakamaru-Ogiso, T. Yagi, D. L. Boger, *J Am Chem Soc* **2006**, *128*, 11799-11807.
- [5] K. Kimura, H. Takahashi, N. Miyata, M. Yoshihama, M. Uramoto, *J Antibiot* **1996**, *49*, 697-699.
- [6] M. Matsumoto, K. Mogi, K. Nagaoka, S. Ishizeki, R. Kawahara, T. Nakashima, *J Antibiot* **1987**, *40*, 149-156.
- [7] H. Mori, S. Funayama, Y. Sudo, K. Komiyama, S. Omura, *J Antibiot* **1990**, *43*, 1329-1331.
- [8] J. L. Giner, J. Feng, D. J. Kiemle, *J Nat Prod* **2016**, *79*, 2413-2417.
- [9] N. N. Shang, Z. Zhang, J. P. Huang, L. Wang, J. Luo, J. Yang, T. Peng, Y. Yan, Y. T. Ma, S. X. Huang, *J Antibiot* **2018**, *71*, 672-676.
- [10] H. Oka, K. Funaishi, K. Kawamura, S. Nakajima, A. Ookura, H. Suda, and M. Okanishi, Antitumor glycosides BE-14324 and their manufacture with *Streptomyces* (**1991**), *Jpn. Kokai Tokkyo Koho*, 12 pp. Japanese Patent: JP 03081283 A2 19910405 Heisei (*in Japanese*).
- [11] T. Tanaka, T. Nakashima, T. Ueda, K. Tomii, I. Kouno, *Chem Pharm Bull* **2007**, *55*, 899-901.

## Spectra of the compounds

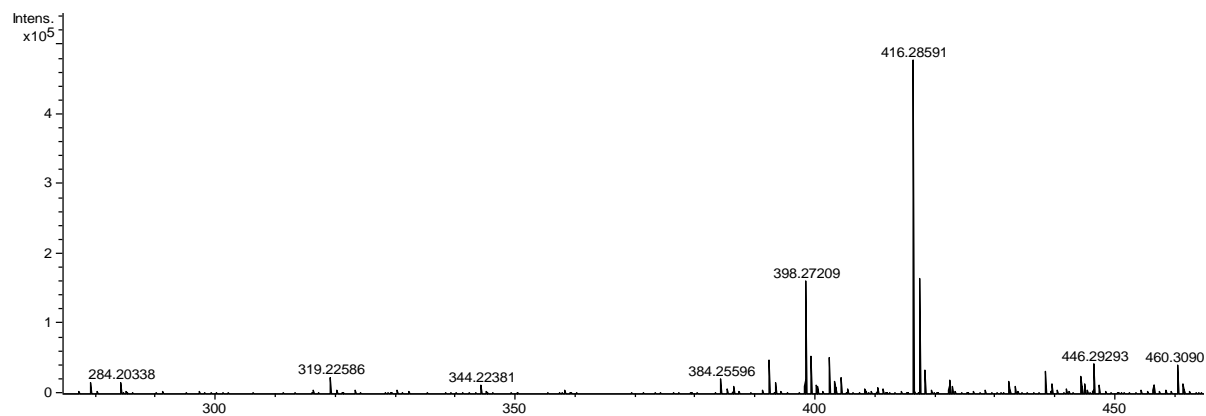

Figure SS-1-1. HRESIMS (+) spectrum of **1**.

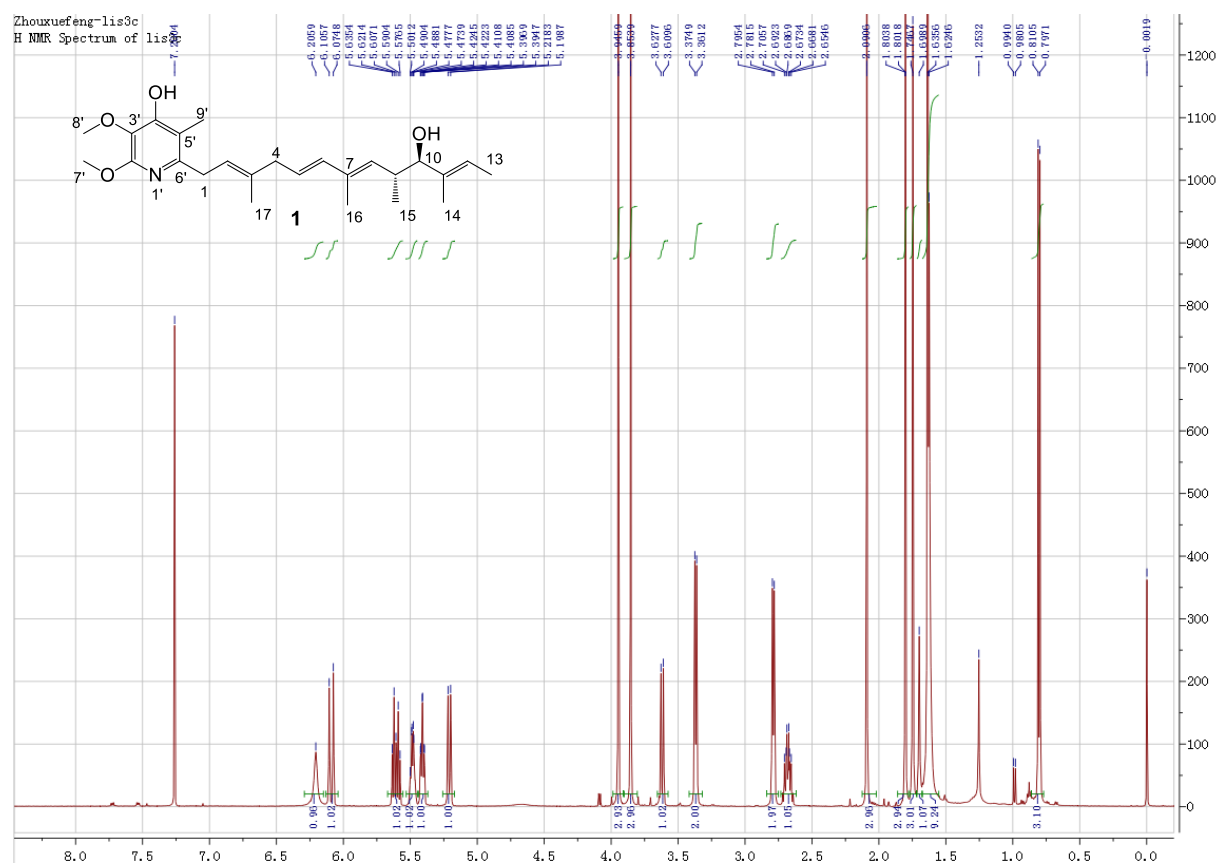

Figure SS-1-2. <sup>1</sup>H NMR spectrum of **1** (in CDCl<sub>3</sub>, 500 MHz).

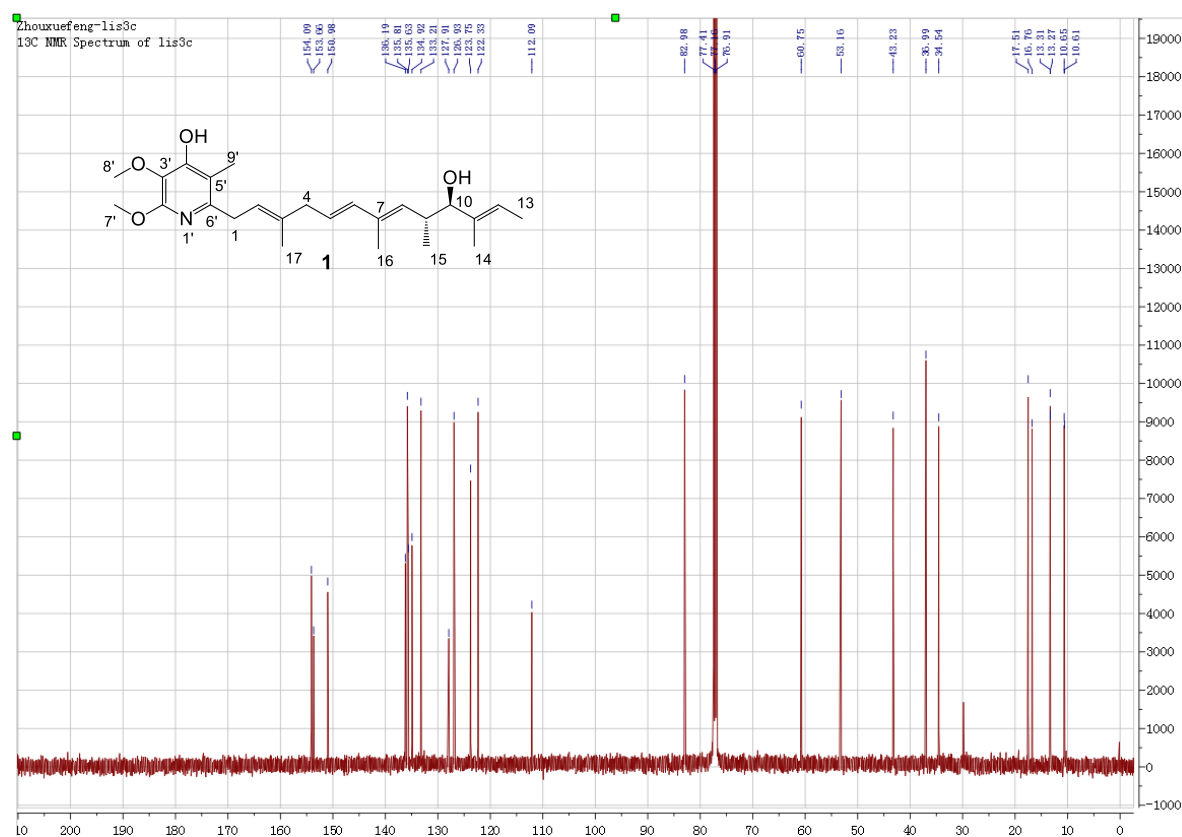

Figure SS-1-3.  $^{13}\text{C}$  NMR spectrum of **1** (in  $\text{CDCl}_3$ , 125 MHz).

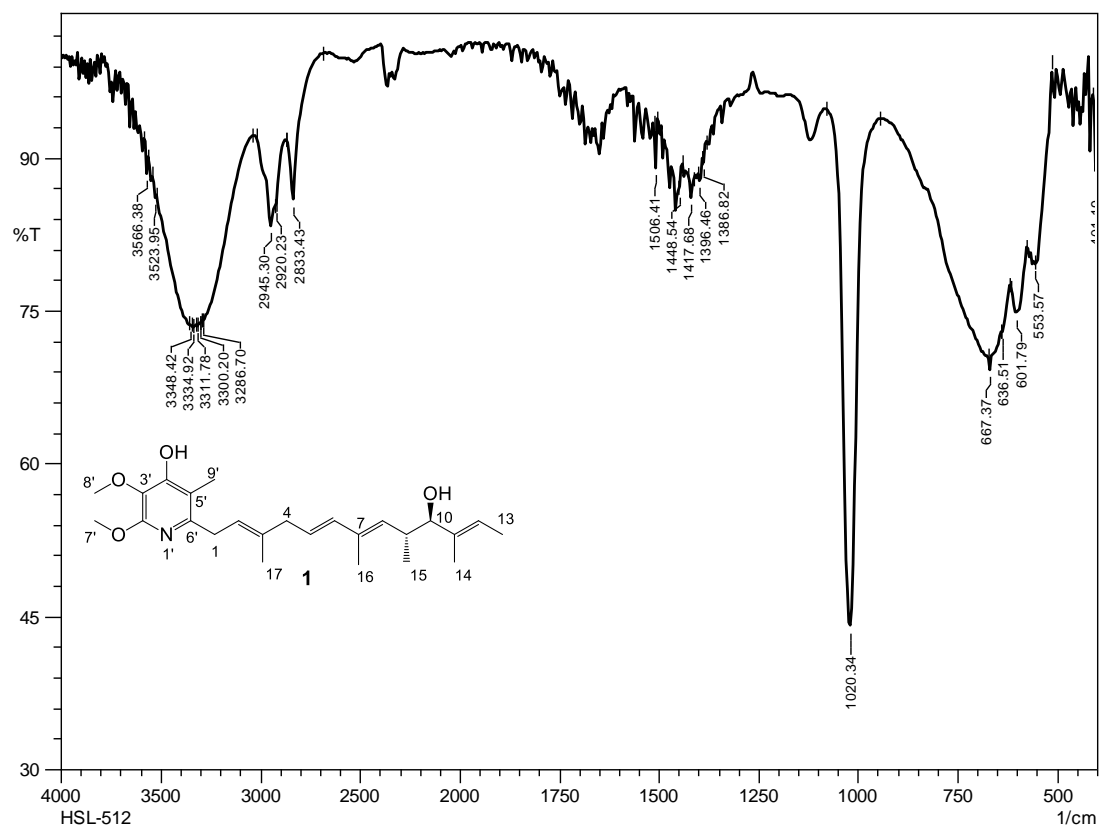

Figure SS-2-1. IR spectrum of **2**.

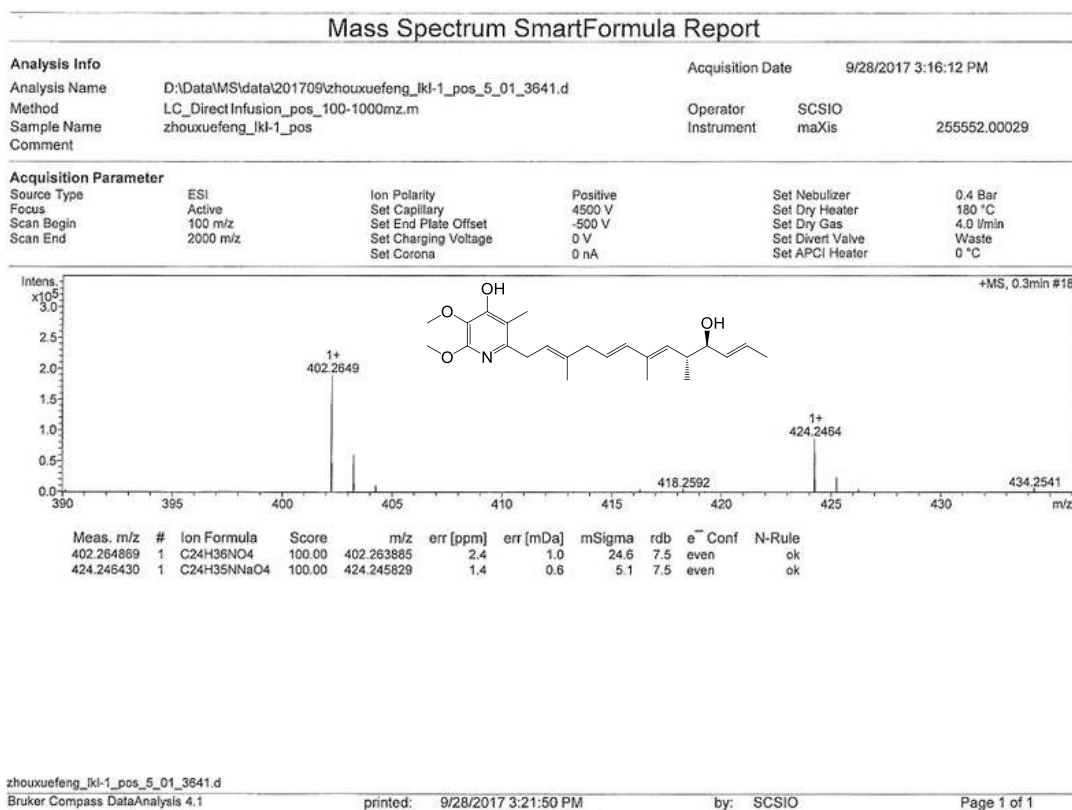

**Figure SS-2-2.** HRESIMS (+) spectrum of **2**.

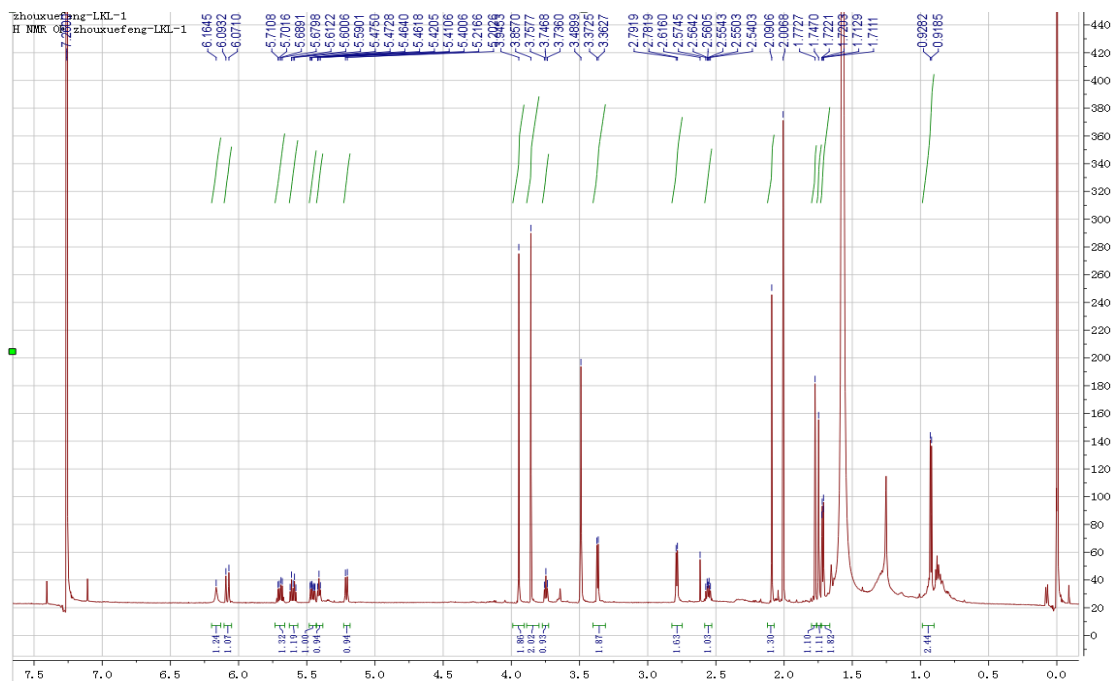

**Figure SS-2-3.** <sup>1</sup>H NMR spectrum of **2** (in CDCl<sub>3</sub>, 700 MHz).



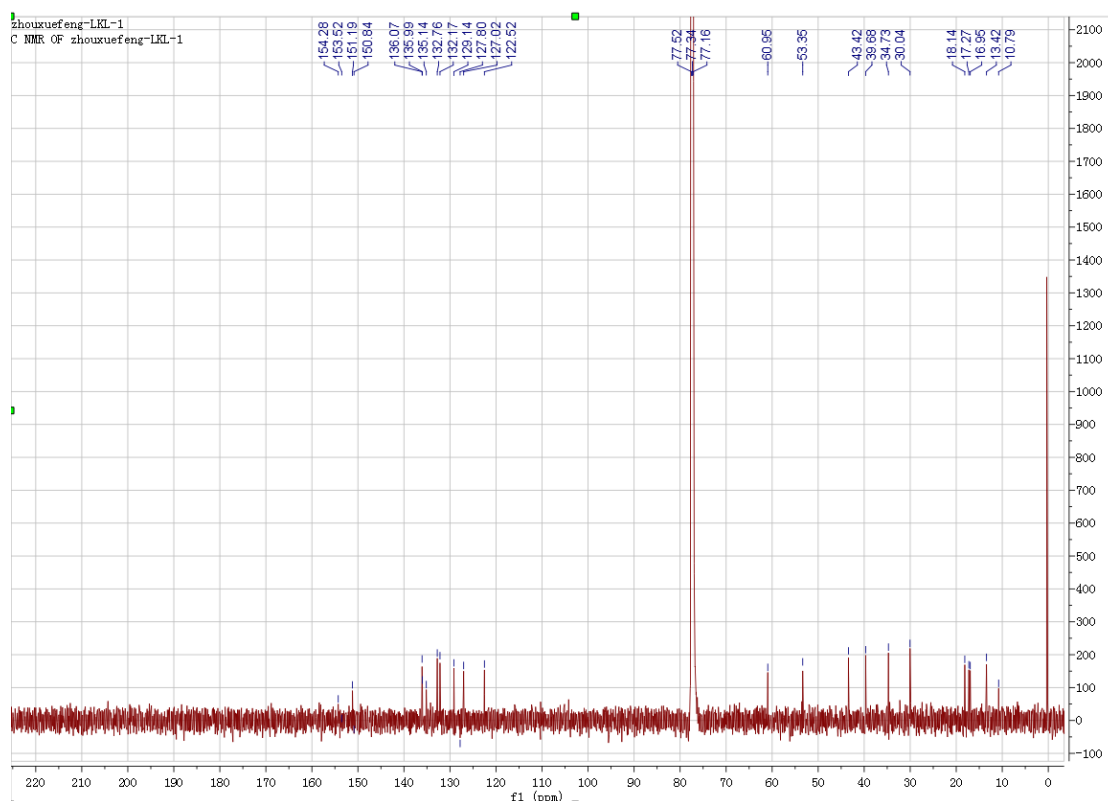

Figure SS-2-4.  $^{13}\text{C}$  NMR spectrum of **2** (in  $\text{CDCl}_3$ , 175 MHz).

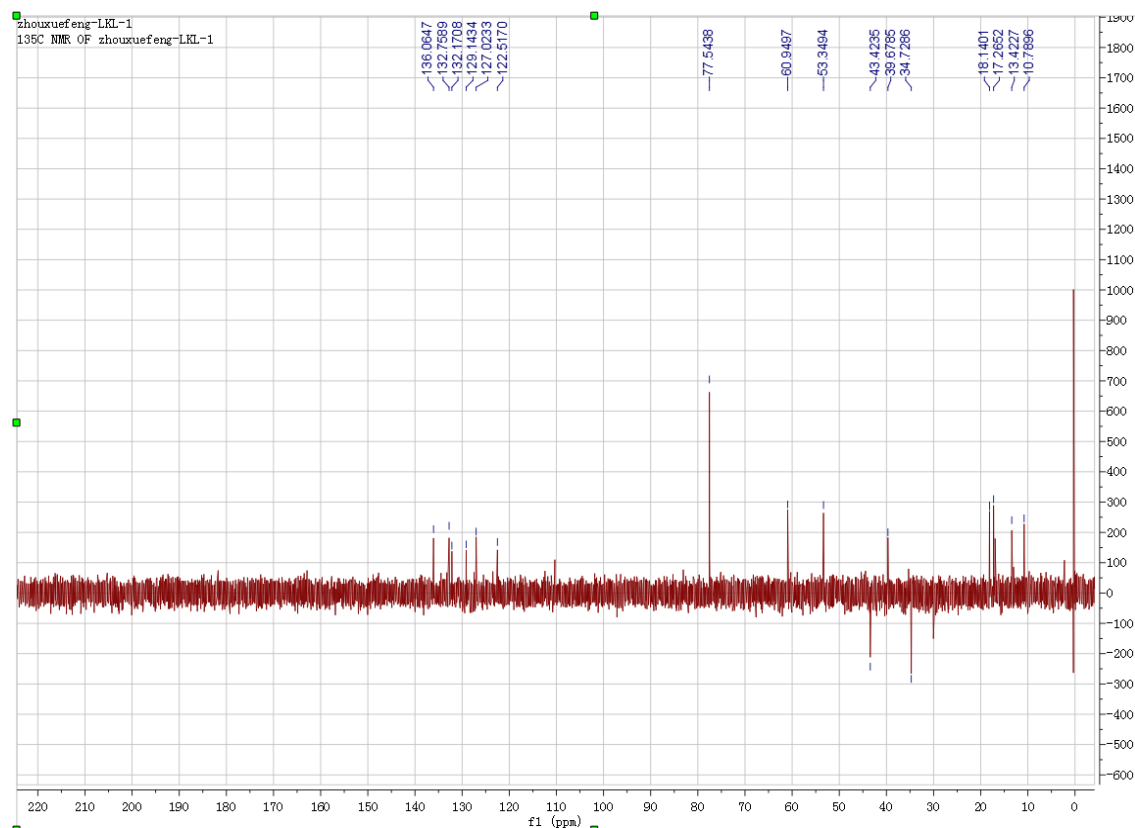

Figure SS-2-5. DEPT spectrum of **2** (in  $\text{CDCl}_3$ , 175 MHz).

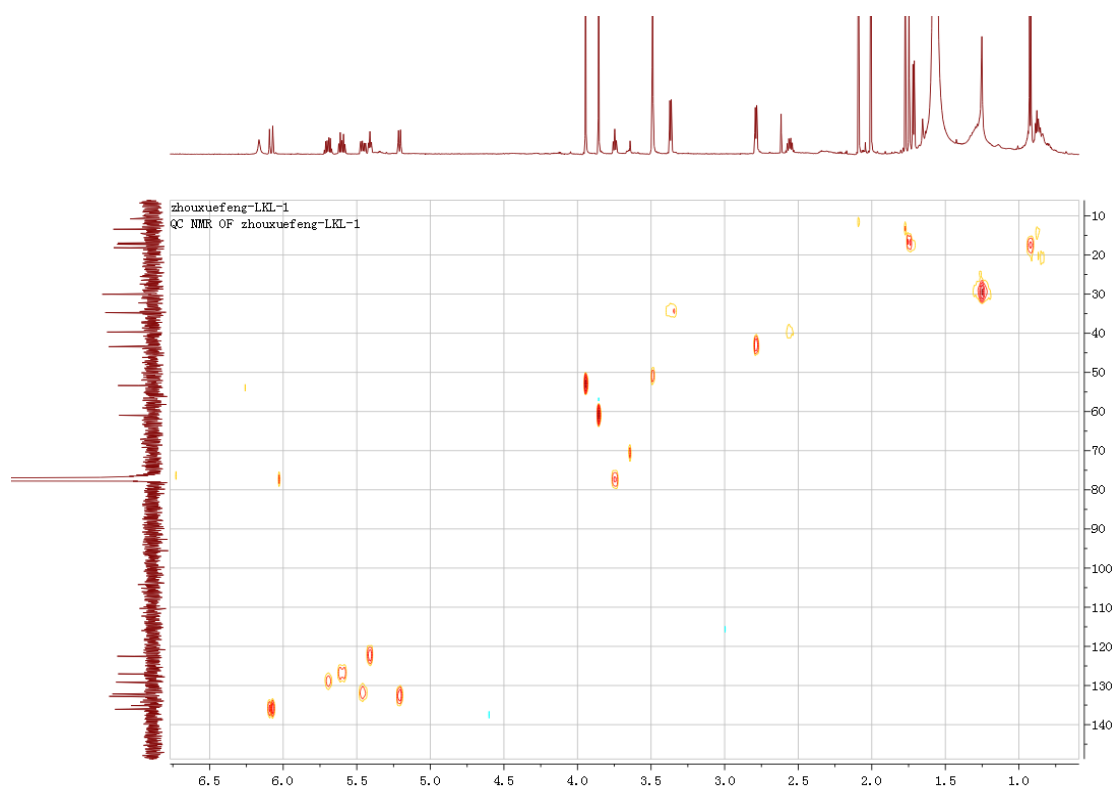

**Figure SS-2-6.** HSQC spectrum of **2** (in  $\text{CDCl}_3$ ).

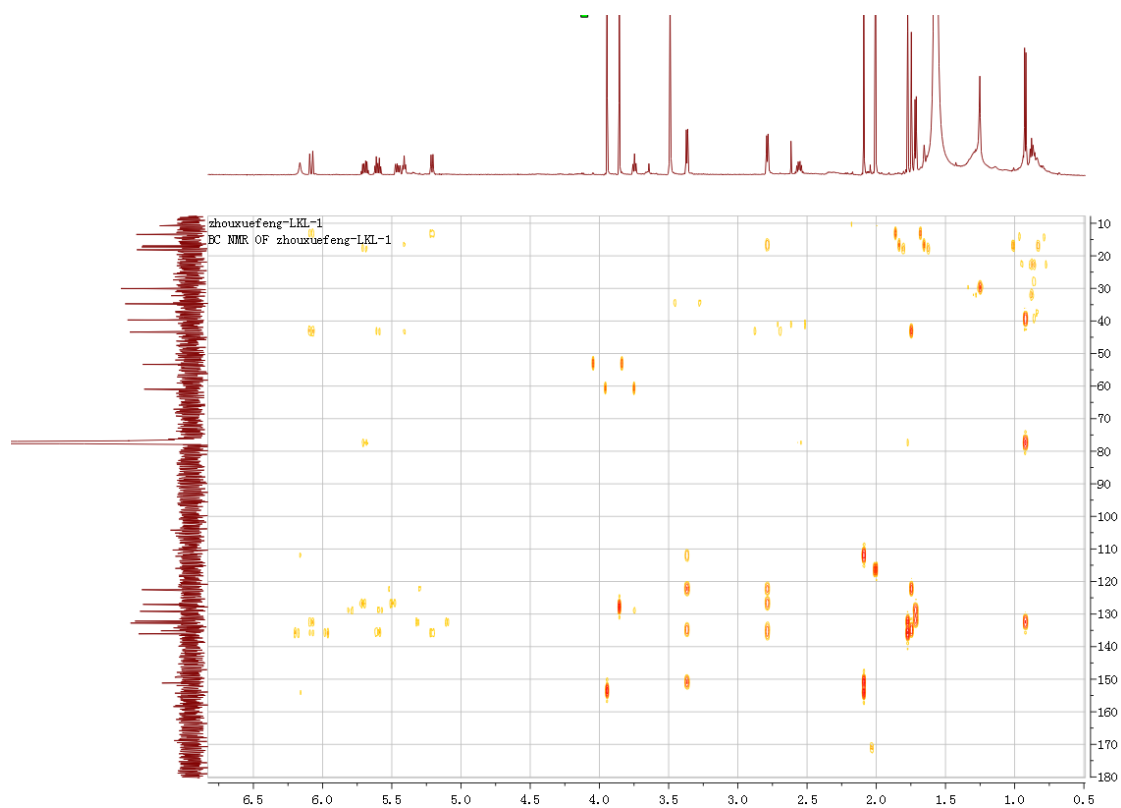

**Figure SS-2-7.** HMBC spectrum of **2** (in  $\text{CDCl}_3$ ).

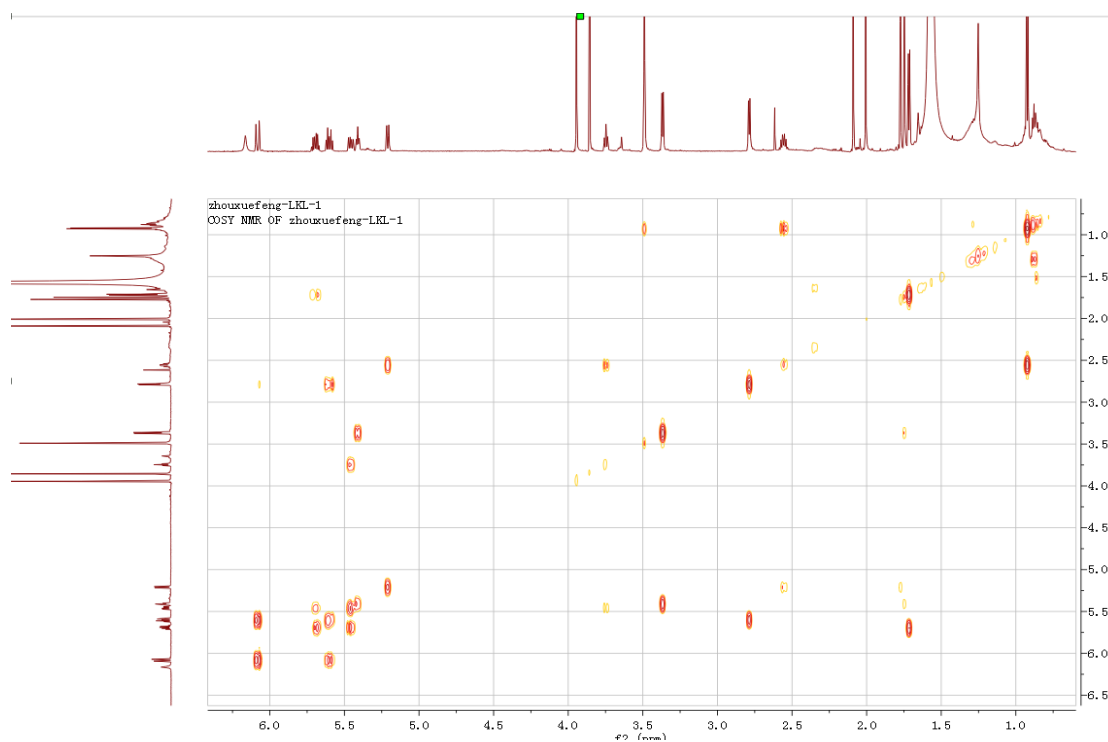

Figure SS-2-8.  $^1\text{H}$ - $^1\text{H}$  COSY spectrum of **2** (in  $\text{CDCl}_3$ ).

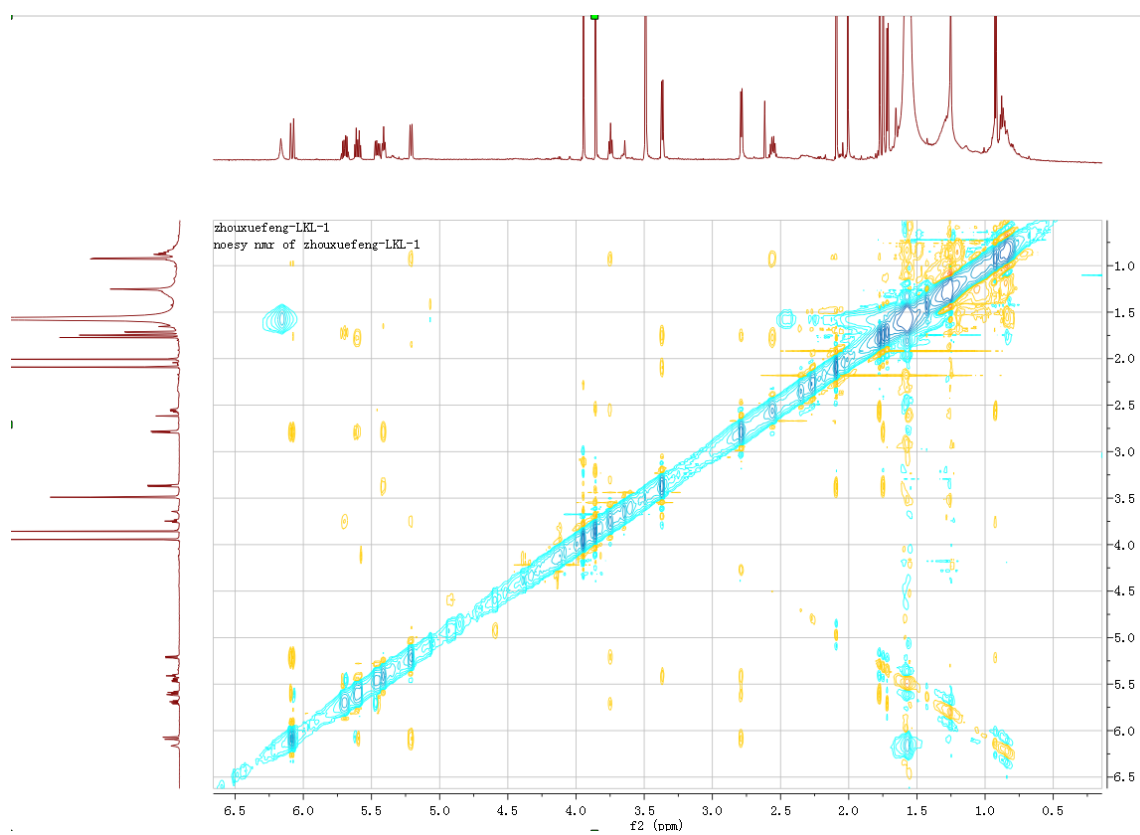

Figure SS-2-9. NOESY spectrum of **2** (in  $\text{CDCl}_3$ ).

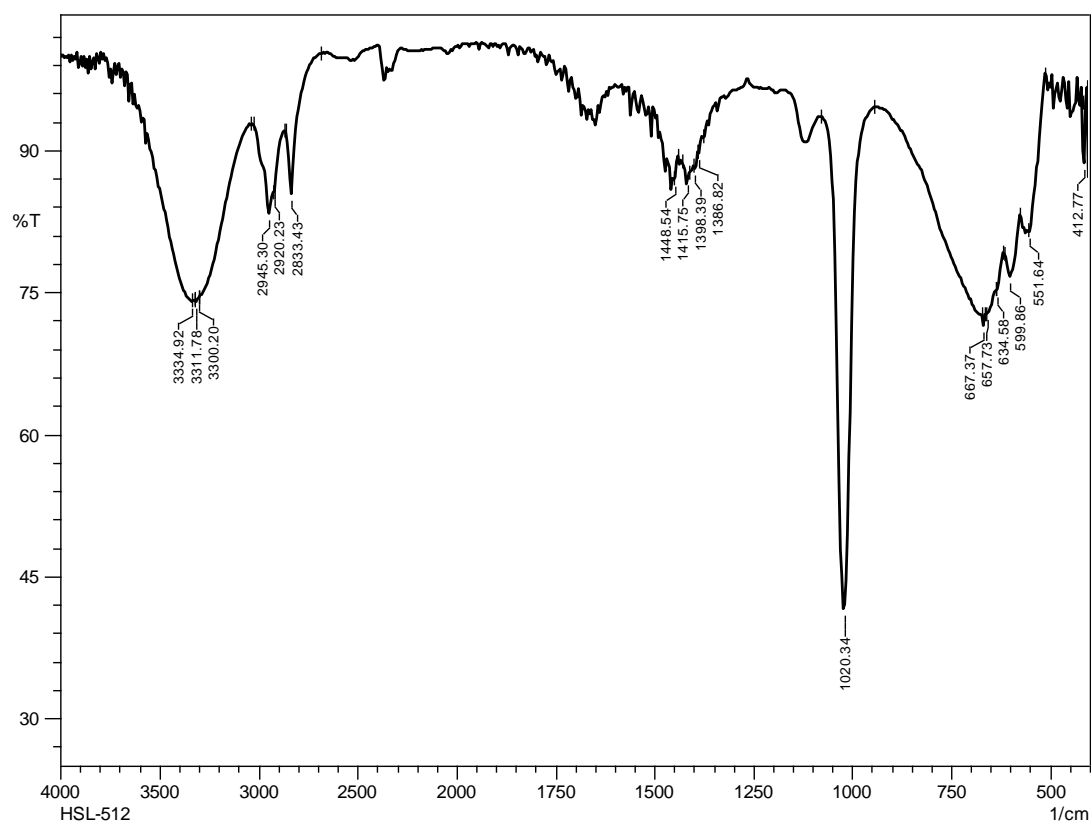

Figure SS-3-1. IR spectrum of **3**.

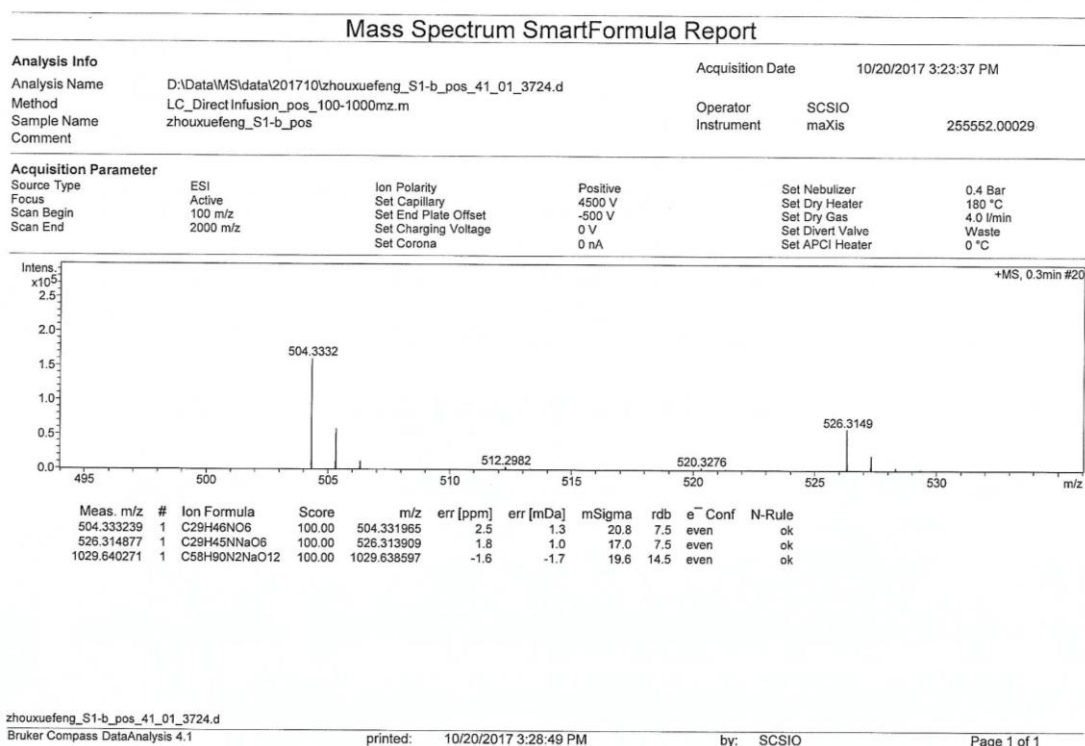

Figure SS-3-2. HRESIMS (+) spectrum of **3**.

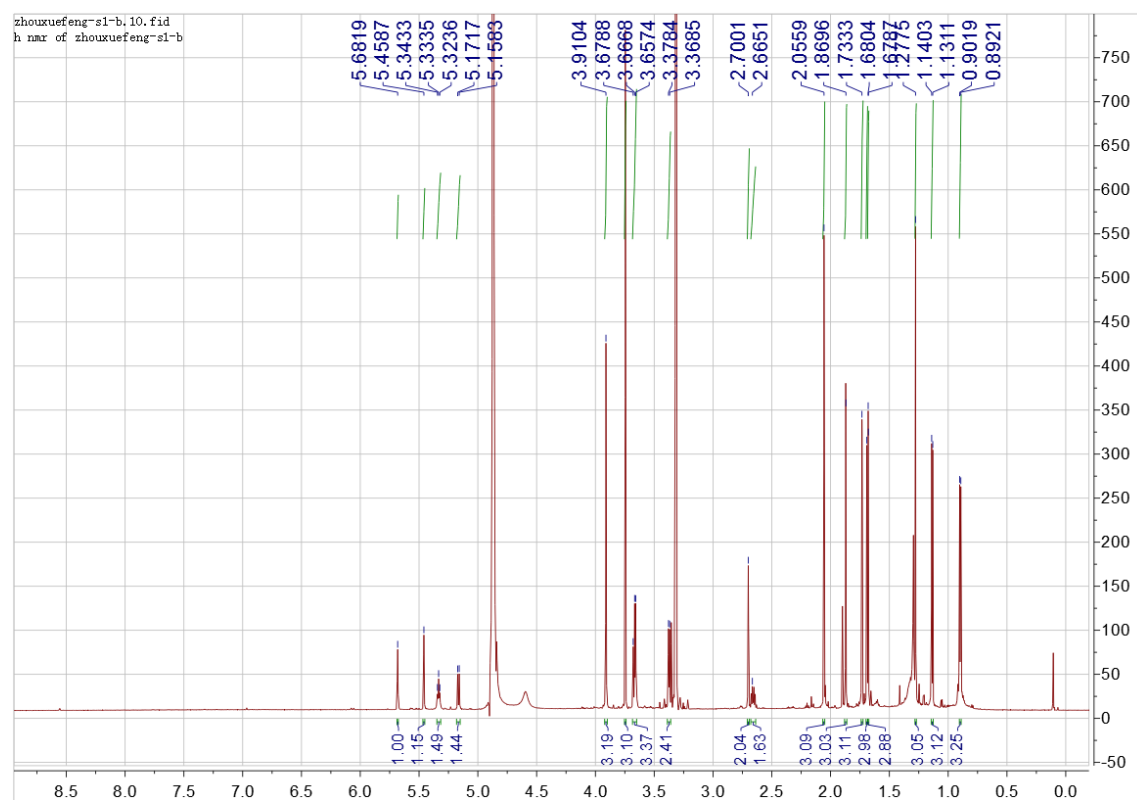

**Figure SS-3-3.**  $^1\text{H}$  NMR spectrum of **3** (in  $\text{CD}_3\text{OD}$ , 700 MHz).

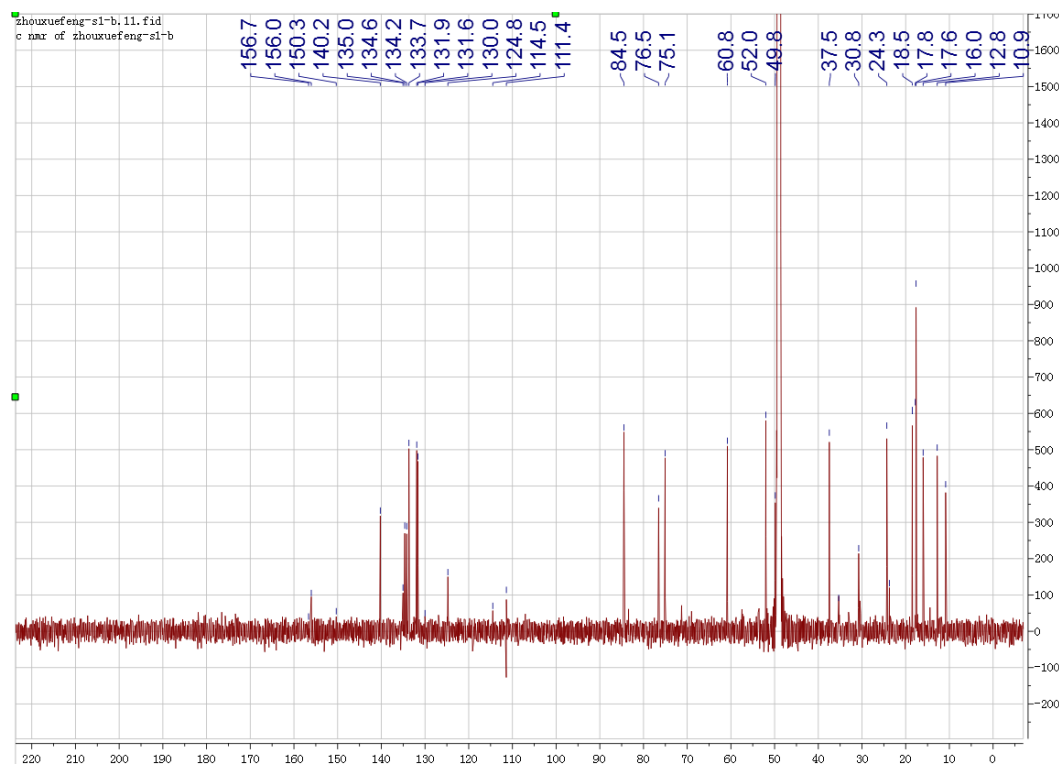

**Figure SS-3-4.**  $^{13}\text{C}$  NMR spectrum of **3** (in  $\text{CD}_3\text{OD}$ , 175 MHz).

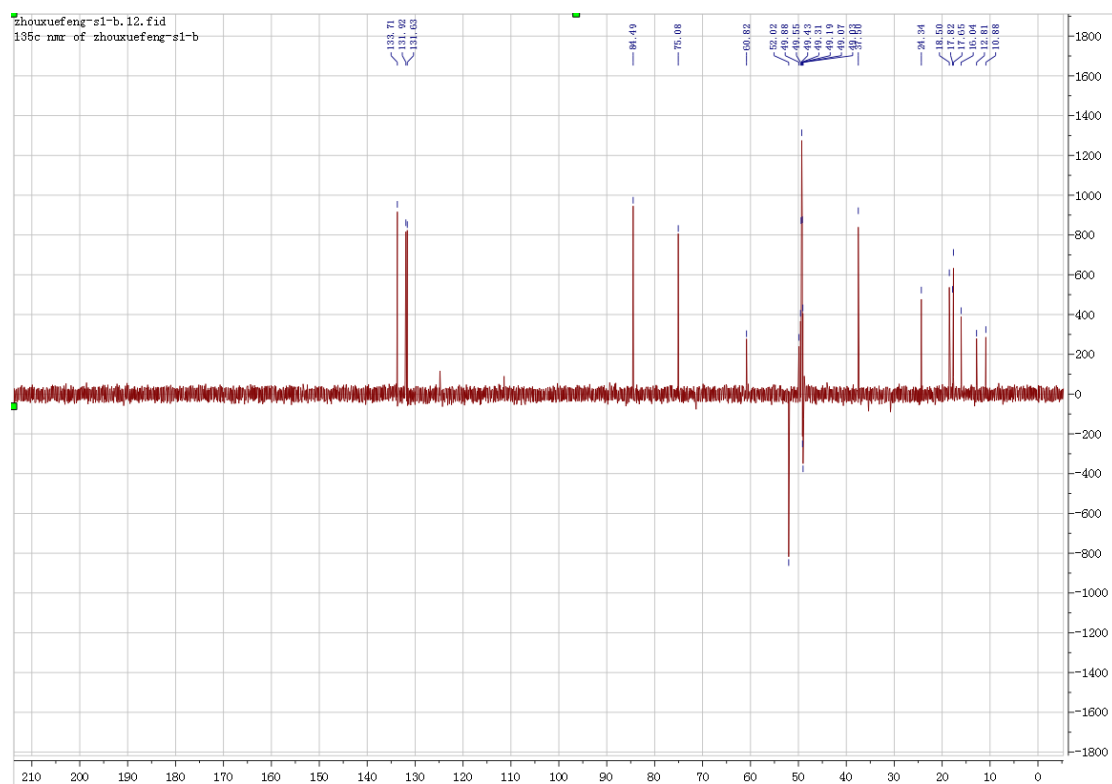

**Figure SS-3-5.** DEPT spectrum of **3** (in CD<sub>3</sub>OD, 175 MHz).

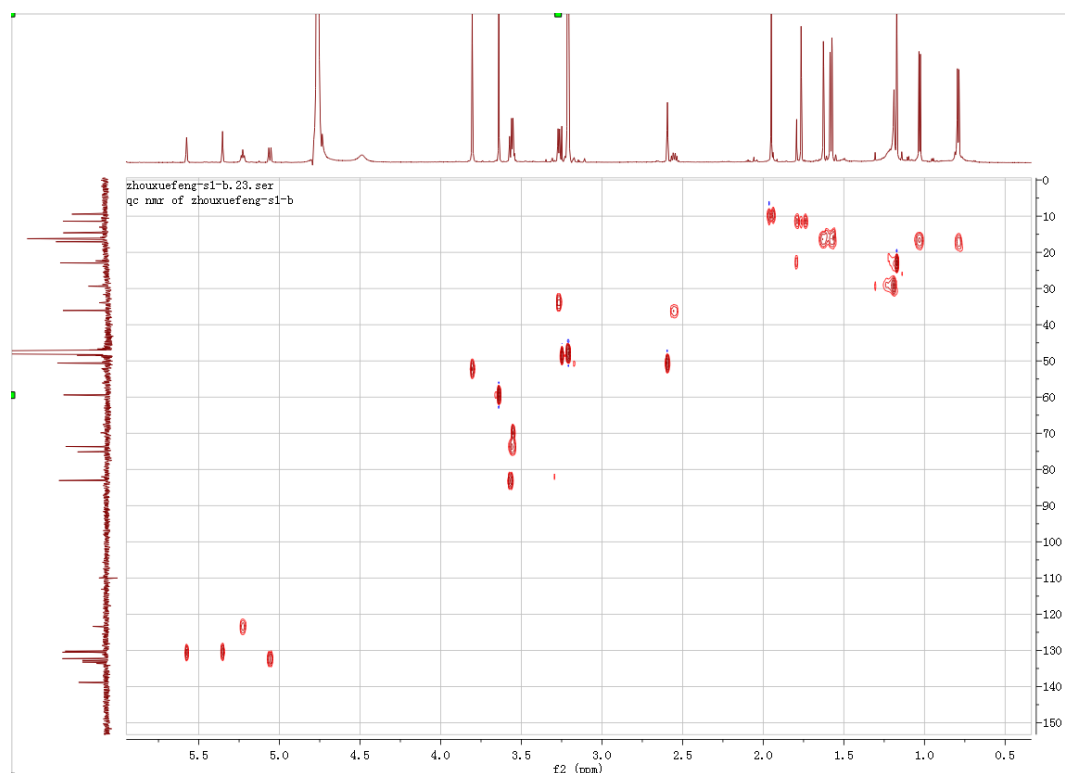

**Figure SS-3-6.** HSQC spectrum of **3** (in CD<sub>3</sub>OD).

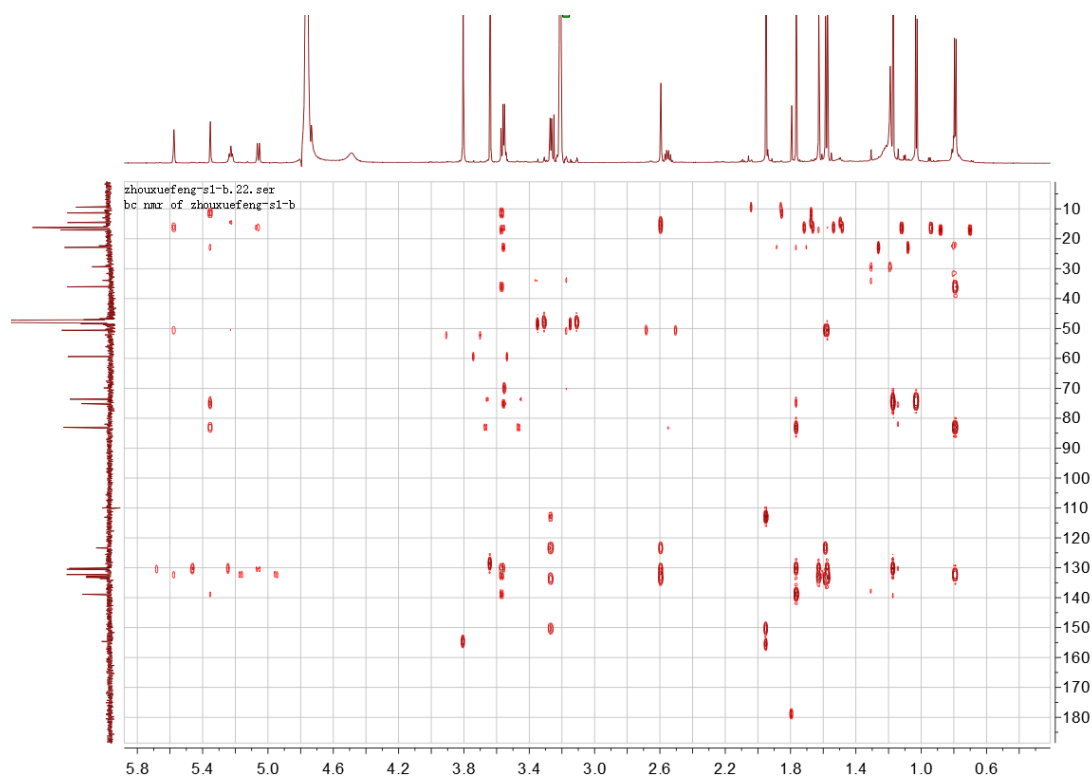

**Figure SS-3-7.** HMBC spectrum of **3** (in CD<sub>3</sub>OD).

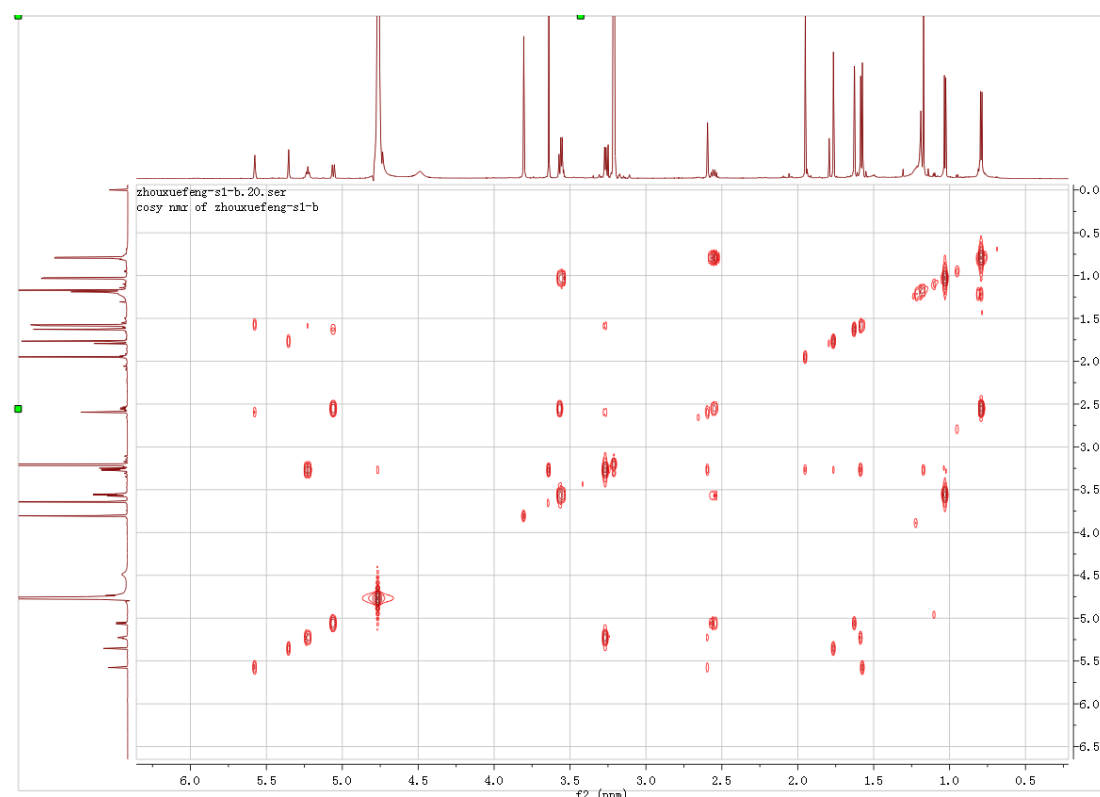

**Figure SS-3-8.** <sup>1</sup>H-<sup>1</sup>H COSY spectrum of **3** (in CD<sub>3</sub>OD).

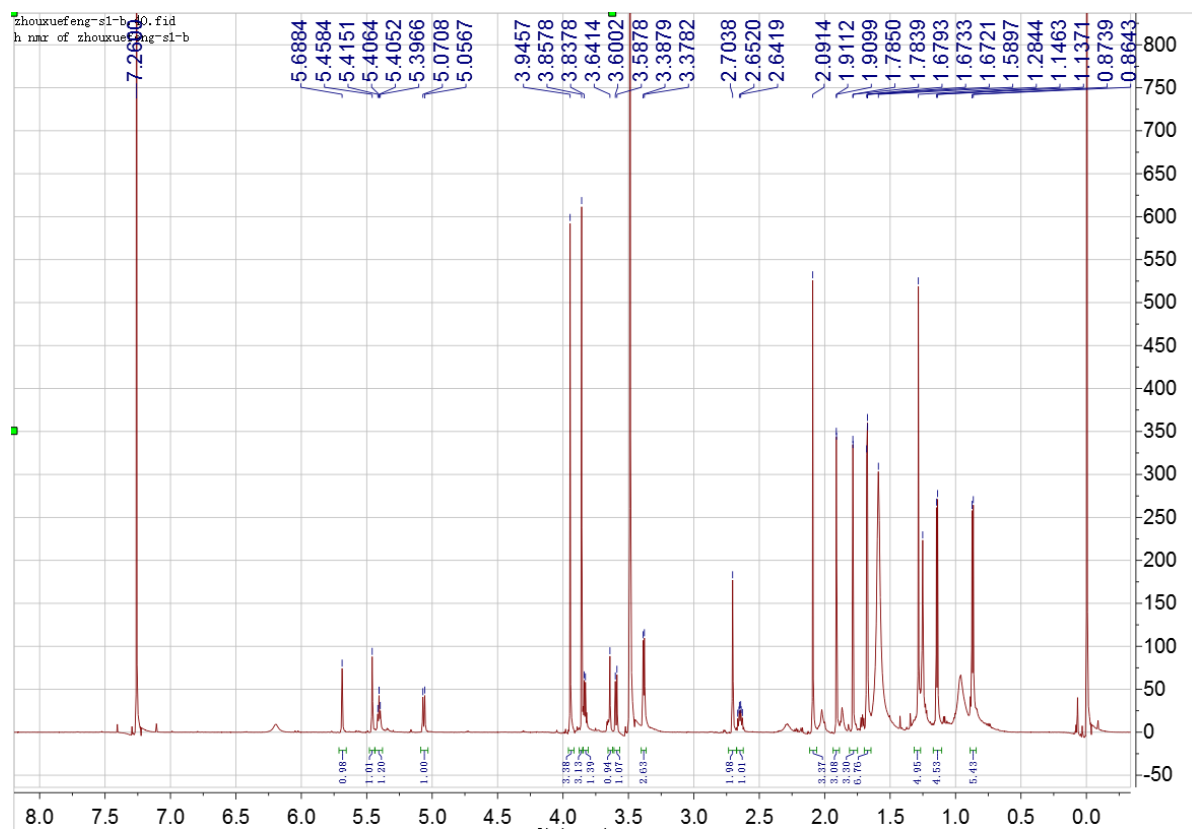

Figure SS-3-9.  $^1\text{H}$  NMR spectrum of **3** (in  $\text{CDCl}_3$ , 700 MHz).

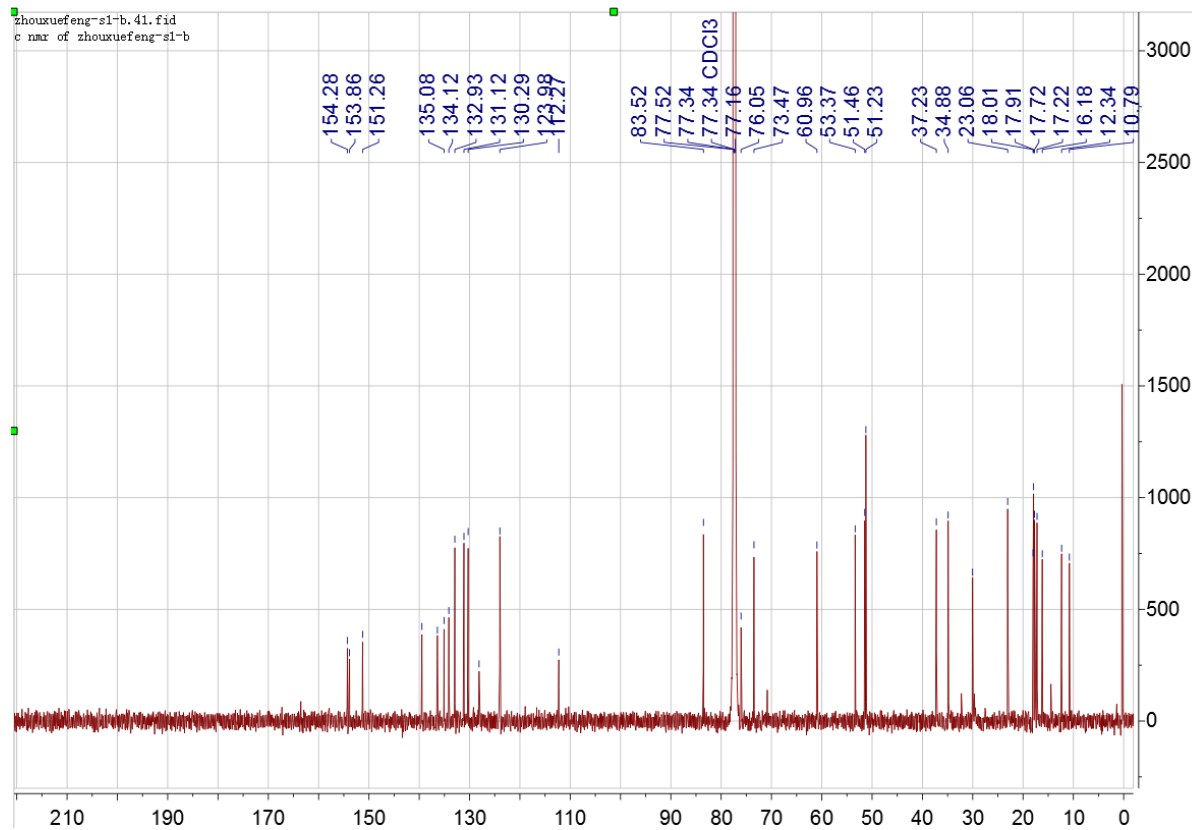

Figure SS-3-10.  $^{13}\text{C}$  NMR spectrum of **3** (in  $\text{CDCl}_3$ , 175 MHz).



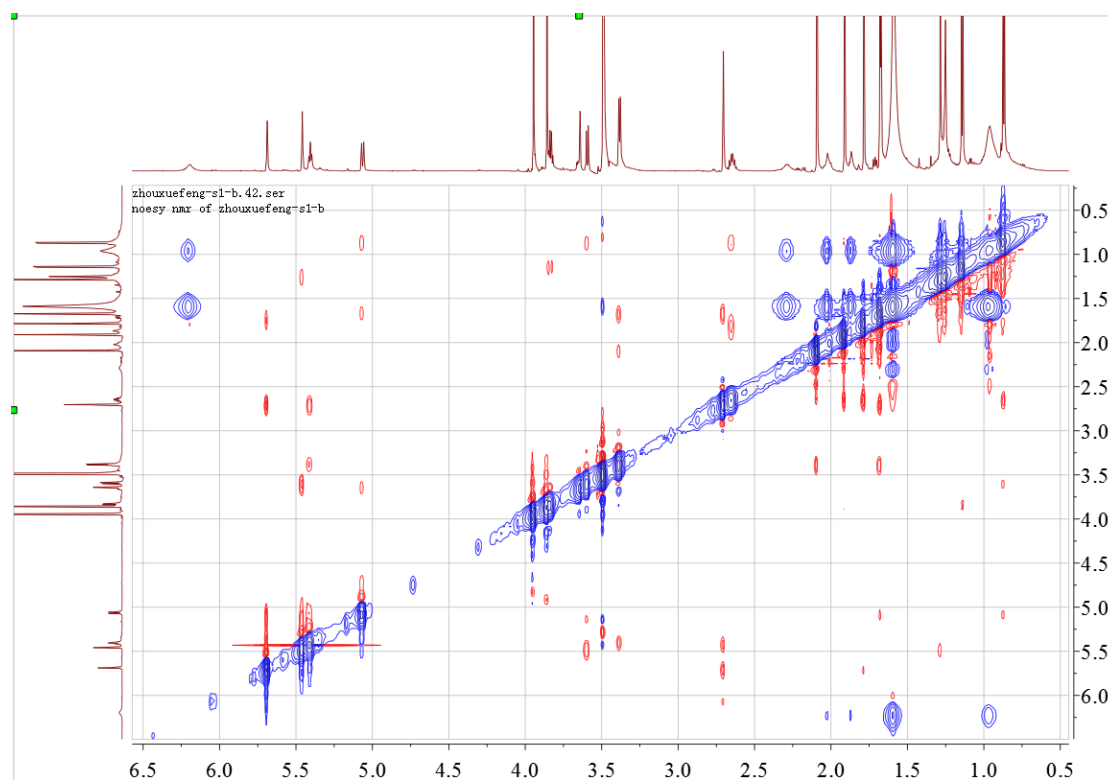

Figure SS-3-11. NOESY spectrum of **3** (in  $\text{CDCl}_3$ ).

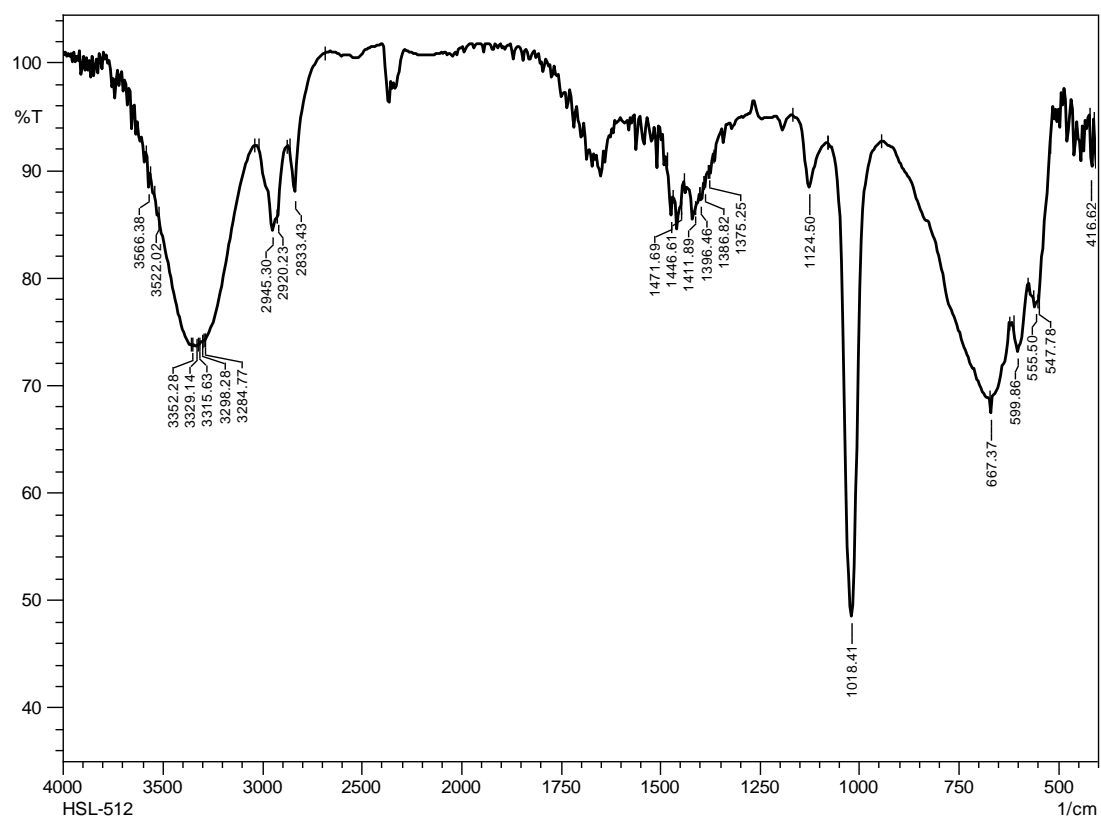

Figure SS-4-1. IR spectrum of **4**.

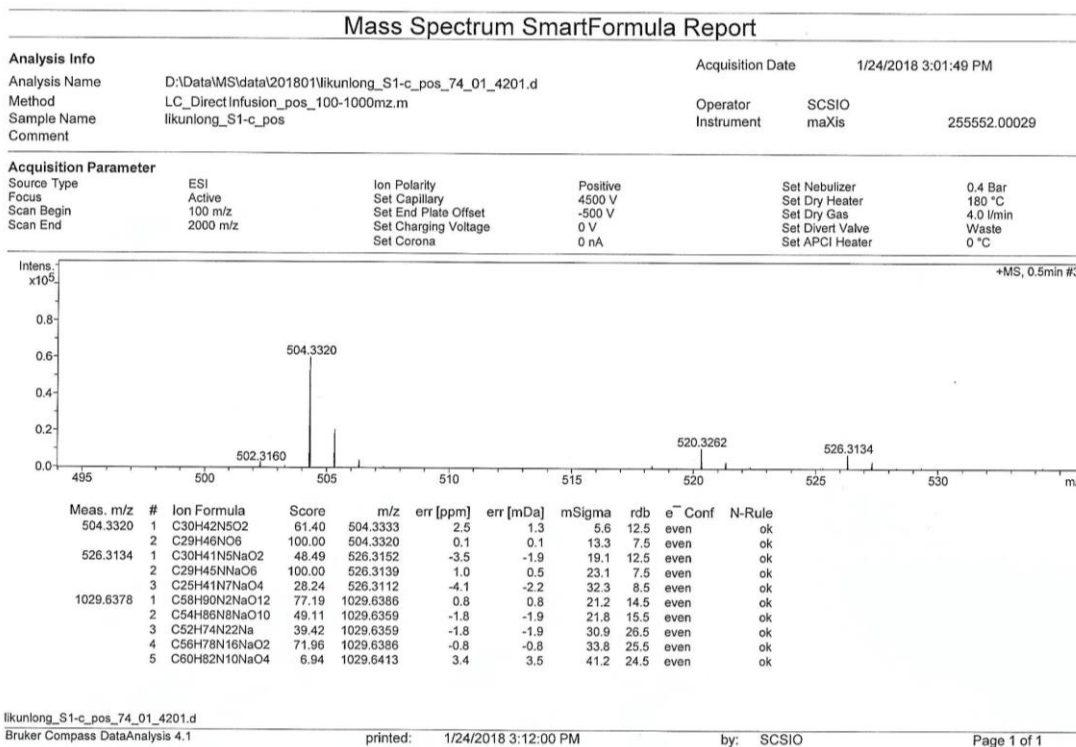

**Figure SS-4-2.** HRESIMS (+) spectrum of **4**.

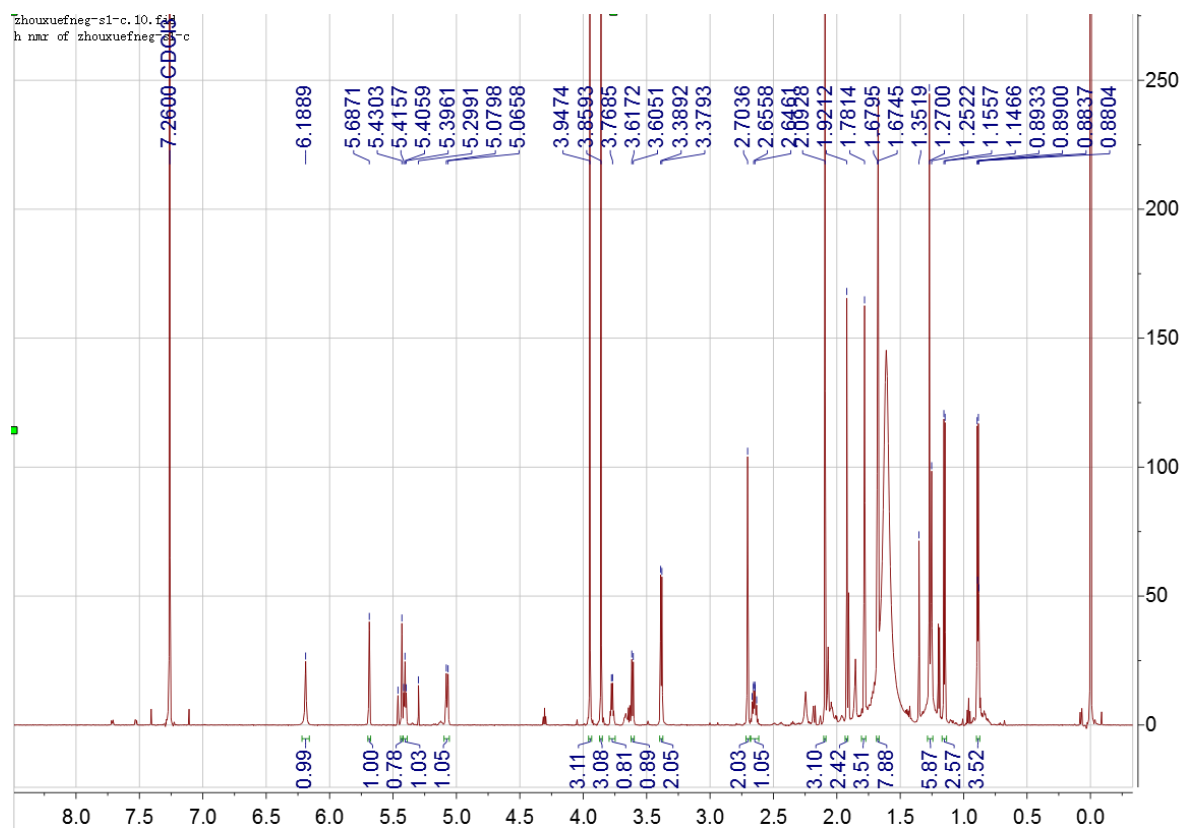

**Figure SS-4-3.** <sup>1</sup>H NMR spectrum of **4** (in CDCl<sub>3</sub>, 700 MHz).

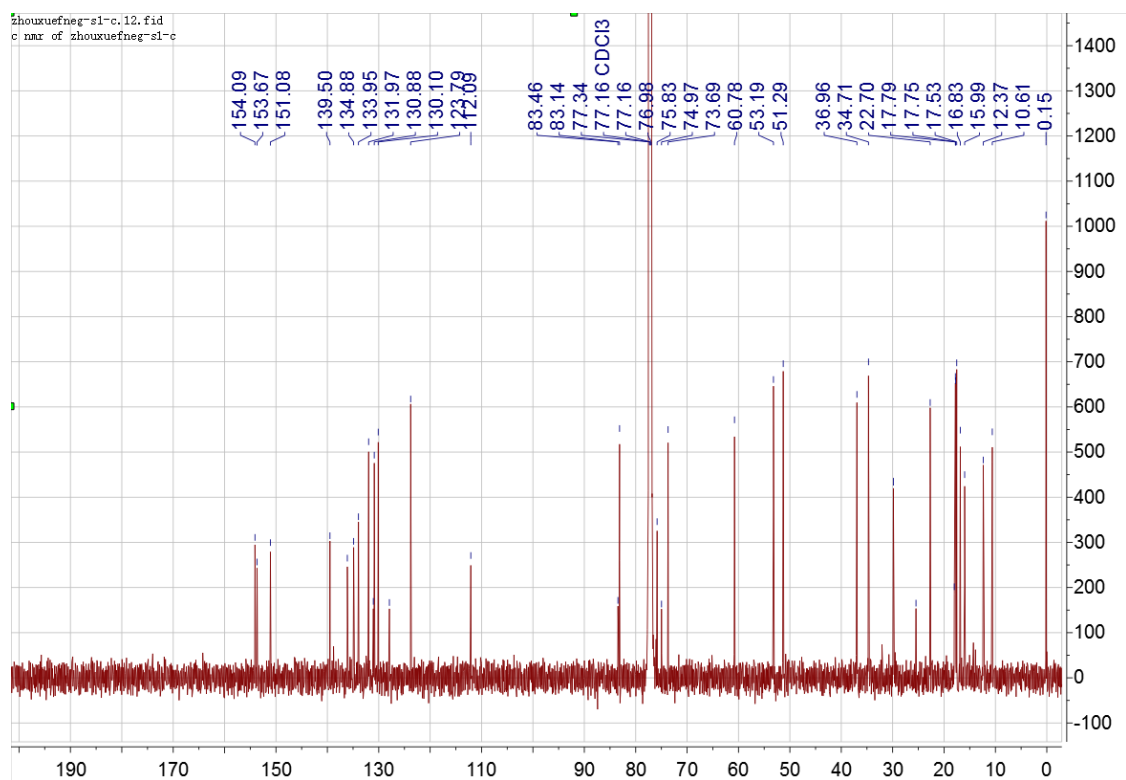

**Figure SS-4-4.**  $^{13}\text{C}$  NMR spectrum of **4** (in  $\text{CDCl}_3$ , 175 MHz).

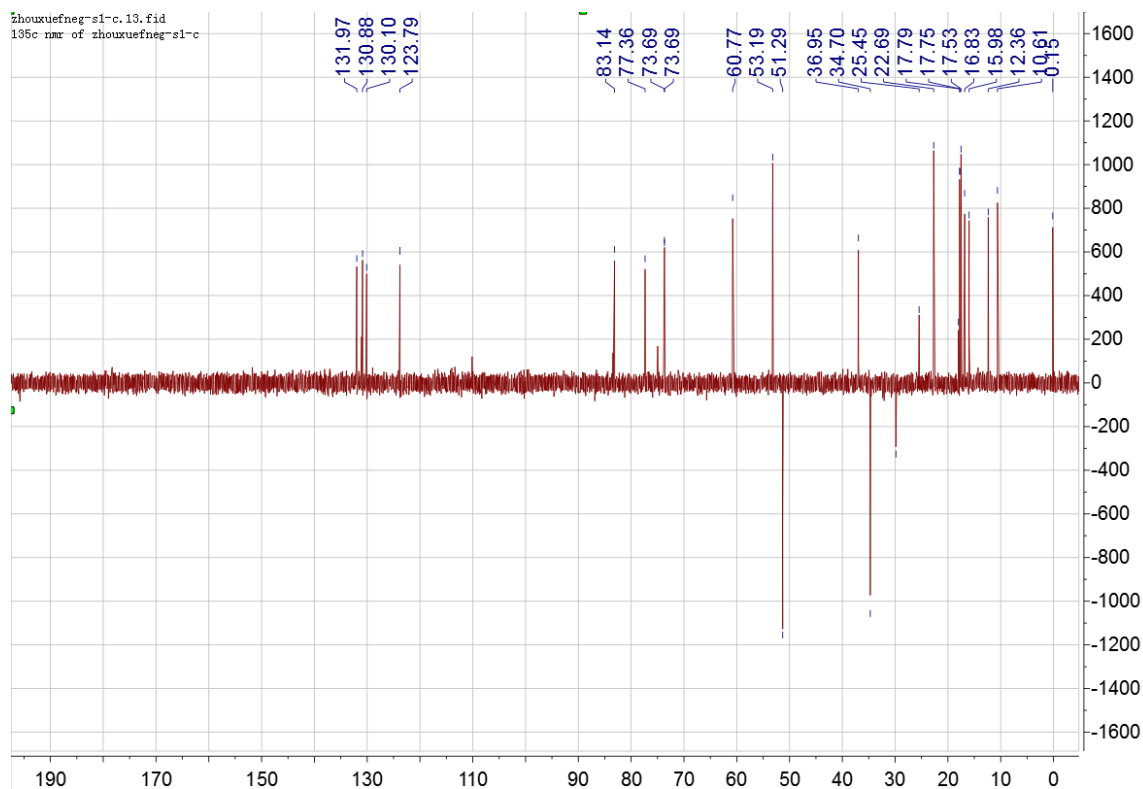

**Figure SS-4-5.** DEPT spectrum of **4** (in  $\text{CDCl}_3$ , 175 MHz).

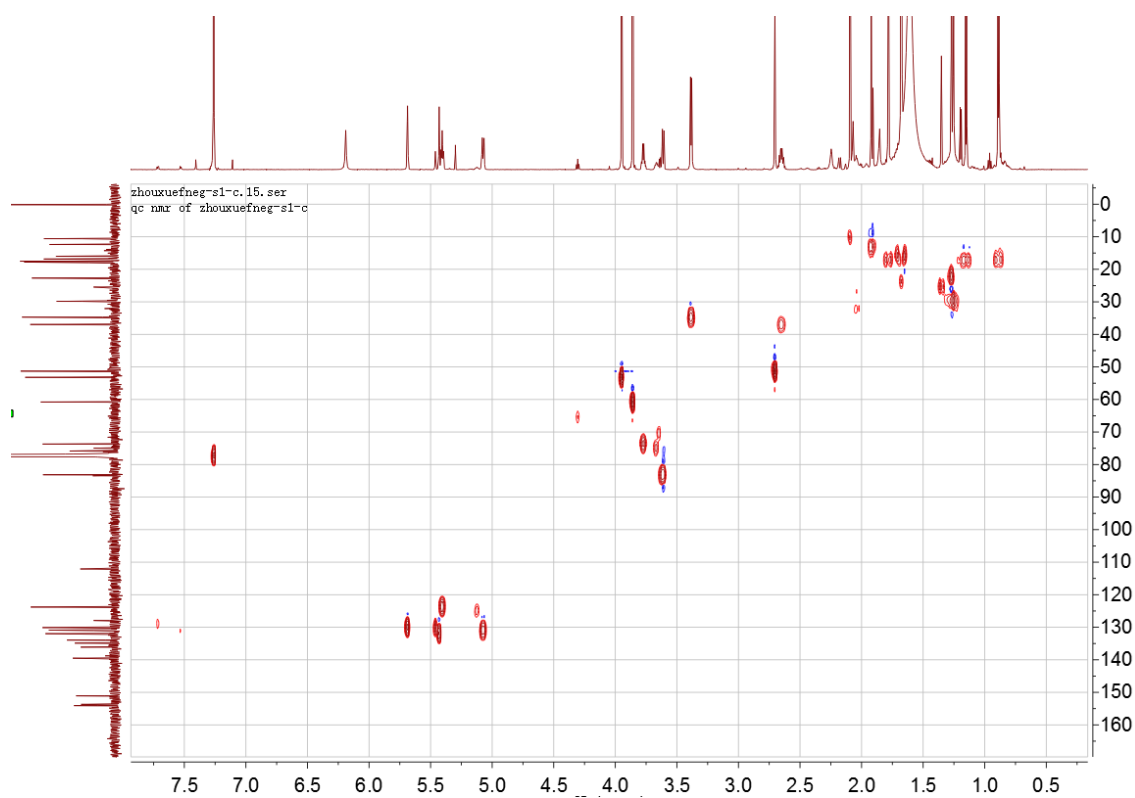

**Figure SS-4-6.** HSQC spectrum of **4** (in  $\text{CDCl}_3$ ).

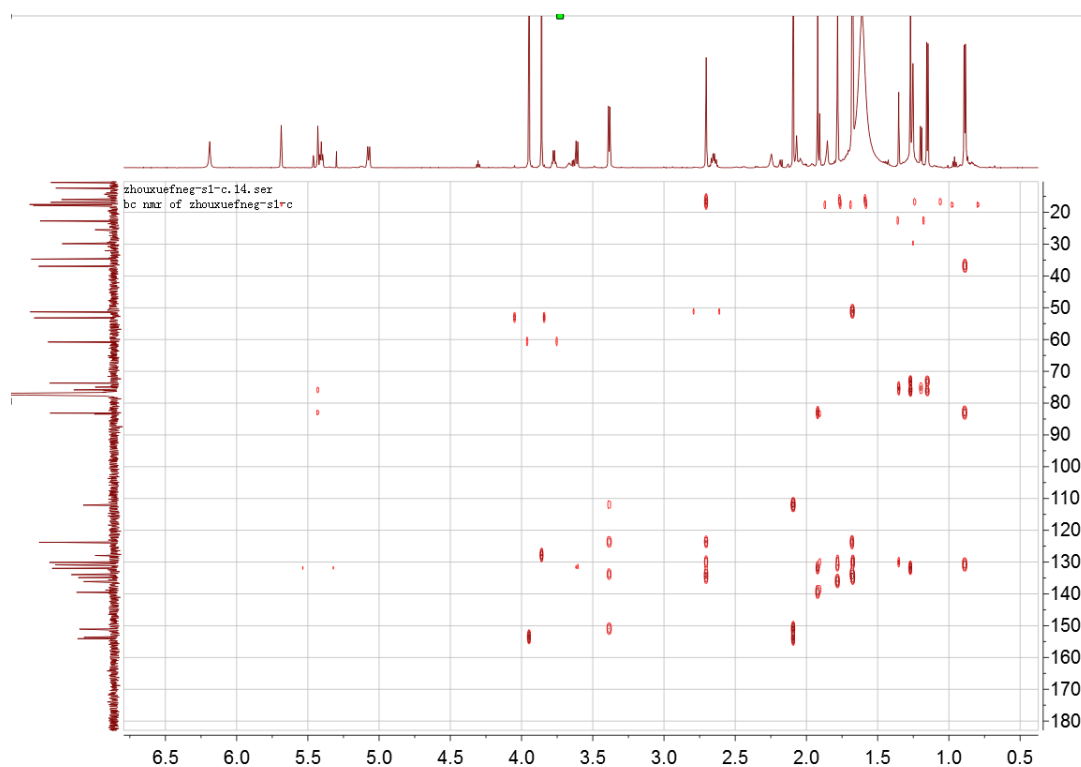

**Figure SS-4-7.** HMBC spectrum of **4** (in  $\text{CDCl}_3$ ).

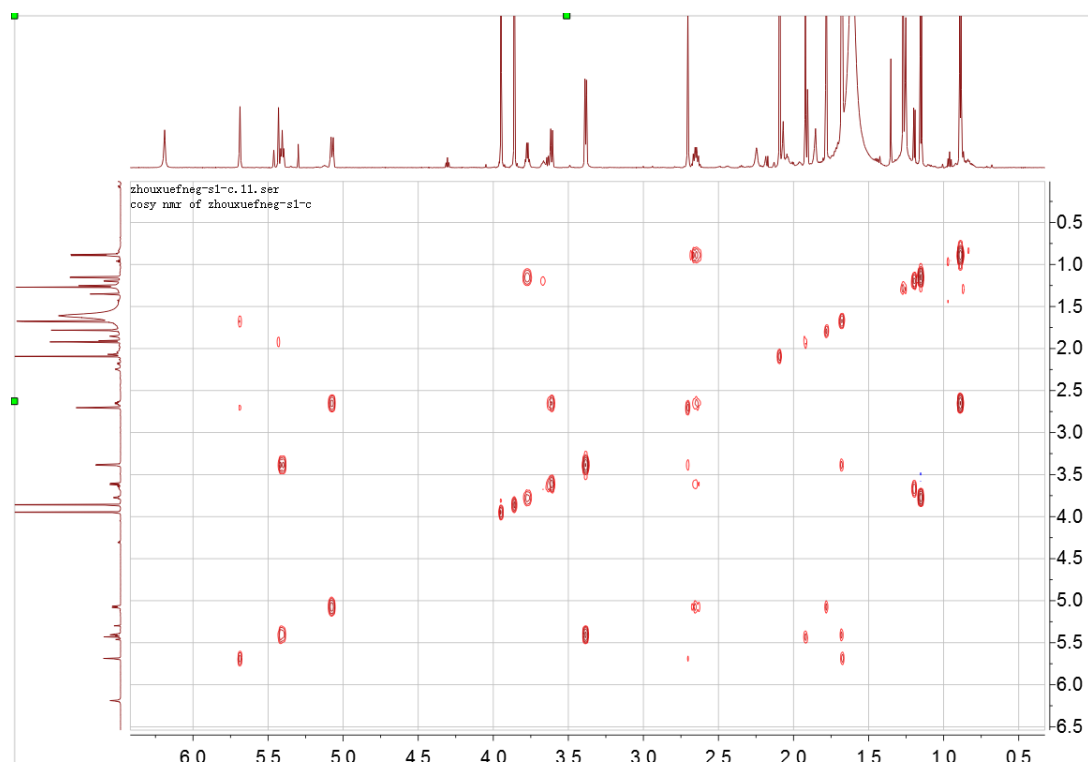

**Figure SS-4-8.**  $^1\text{H}$ - $^1\text{H}$  COSY spectrum of **4** (in  $\text{CDCl}_3$ ).

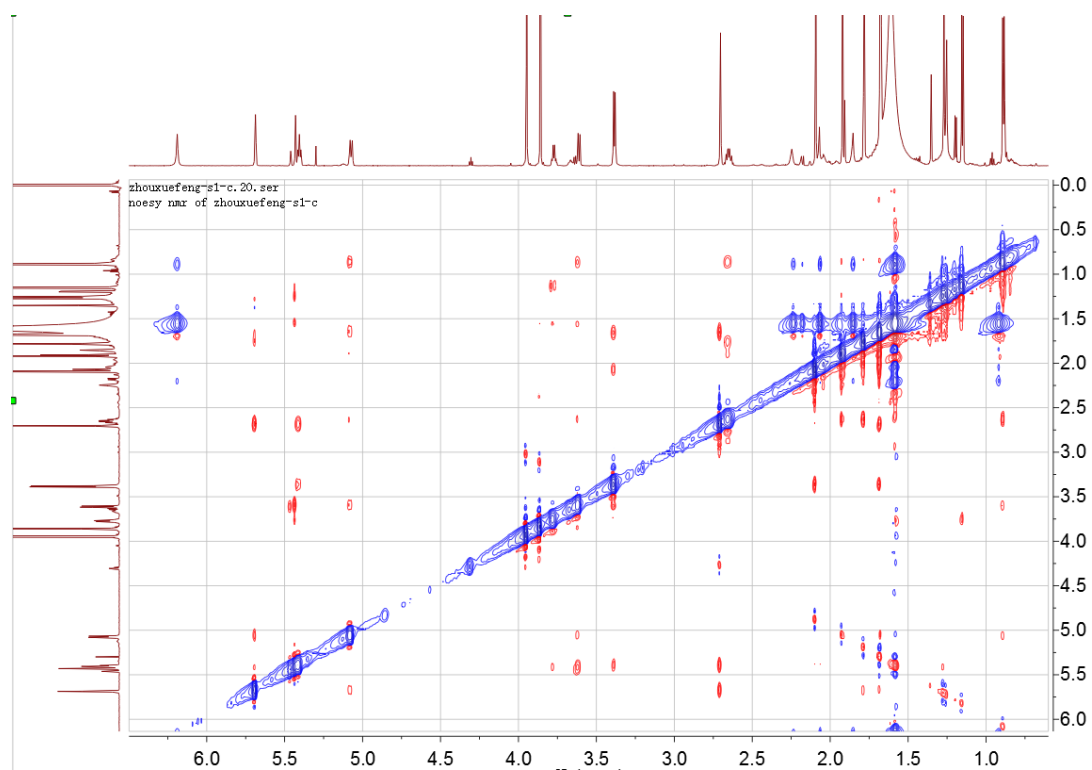

**Figure SS-4-9.** NOESY spectrum of **4** (in  $\text{CDCl}_3$ ).

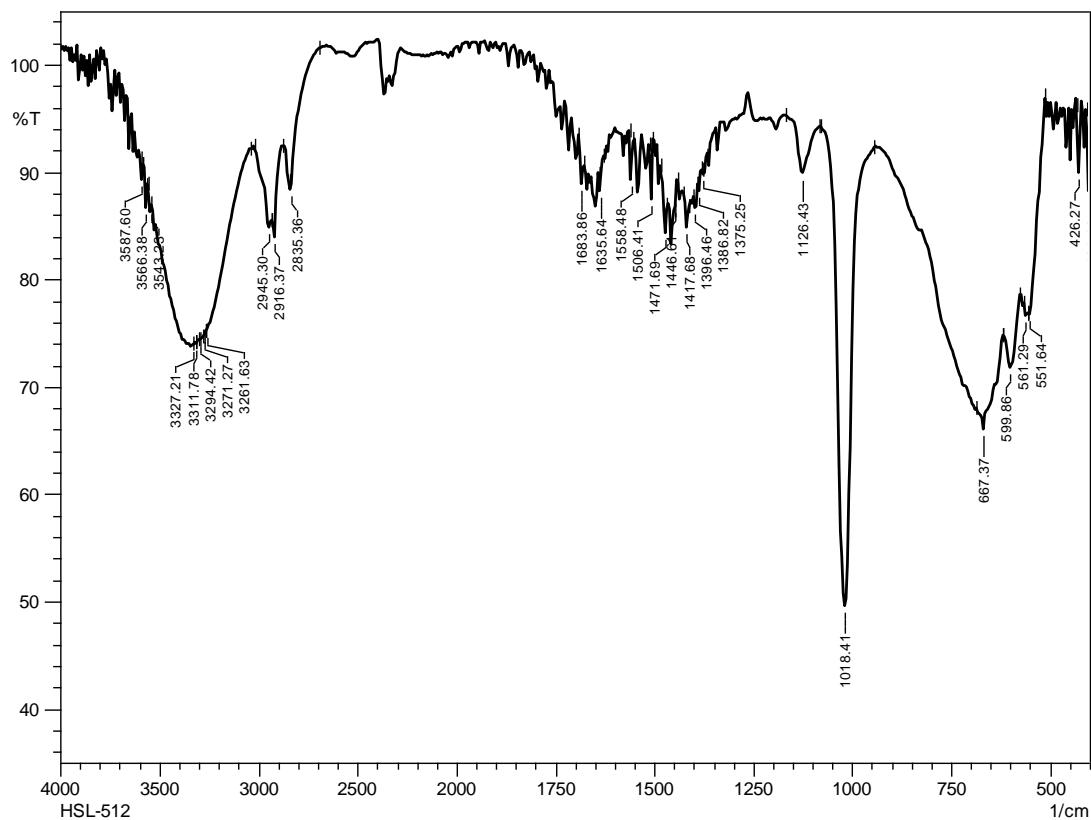

Figure SS-5-1. IR spectrum of 5.

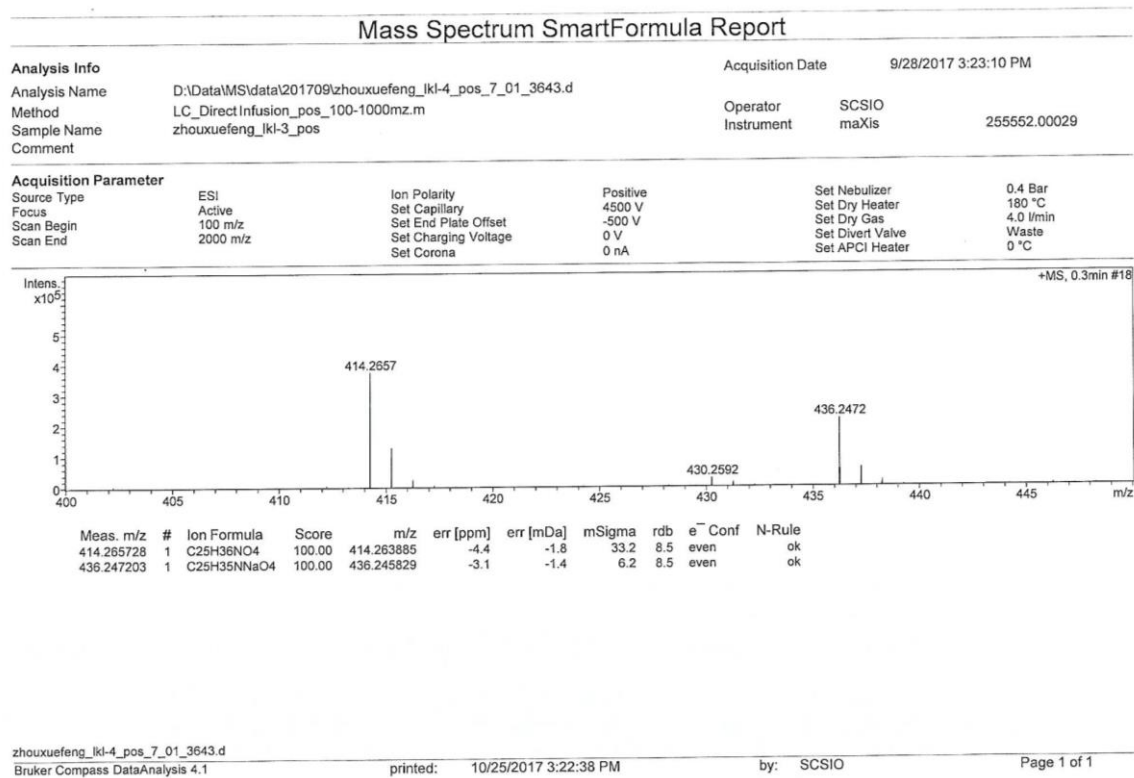

Figure SS-5-2. HRESIMS (+) spectrum of 5.

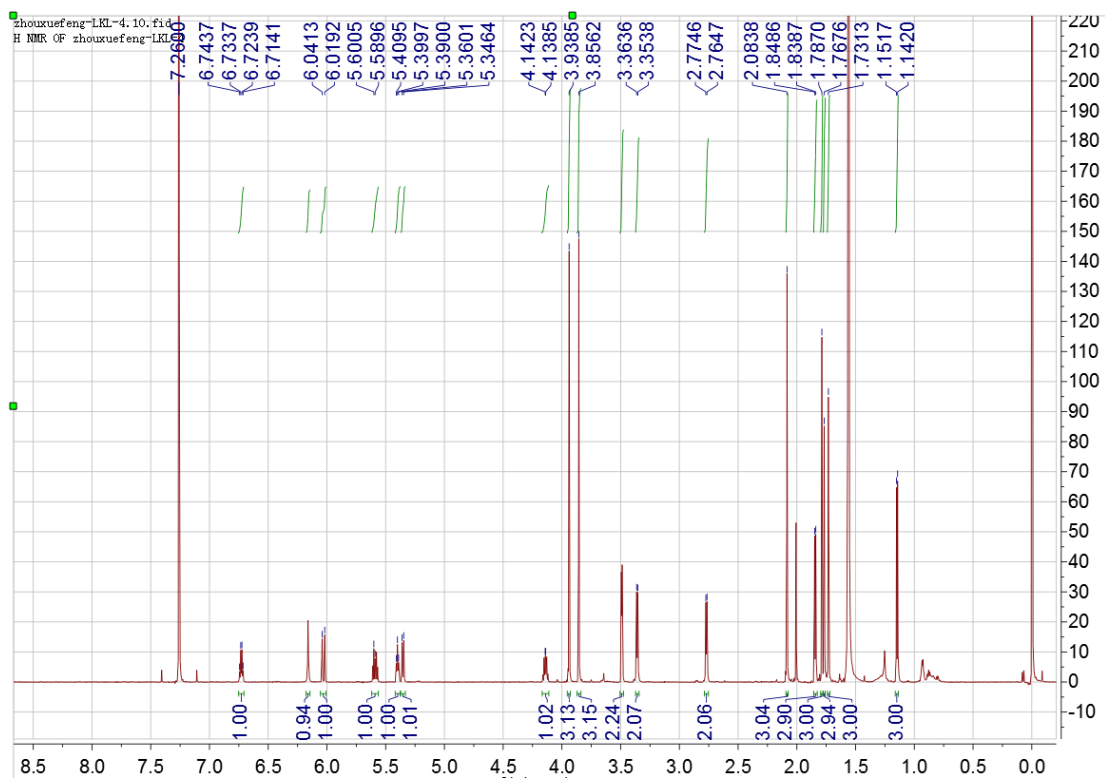

**Figure SS-5-3.**  $^1\text{H}$  NMR spectrum of **5** (in  $\text{CDCl}_3$ , 700 MHz).

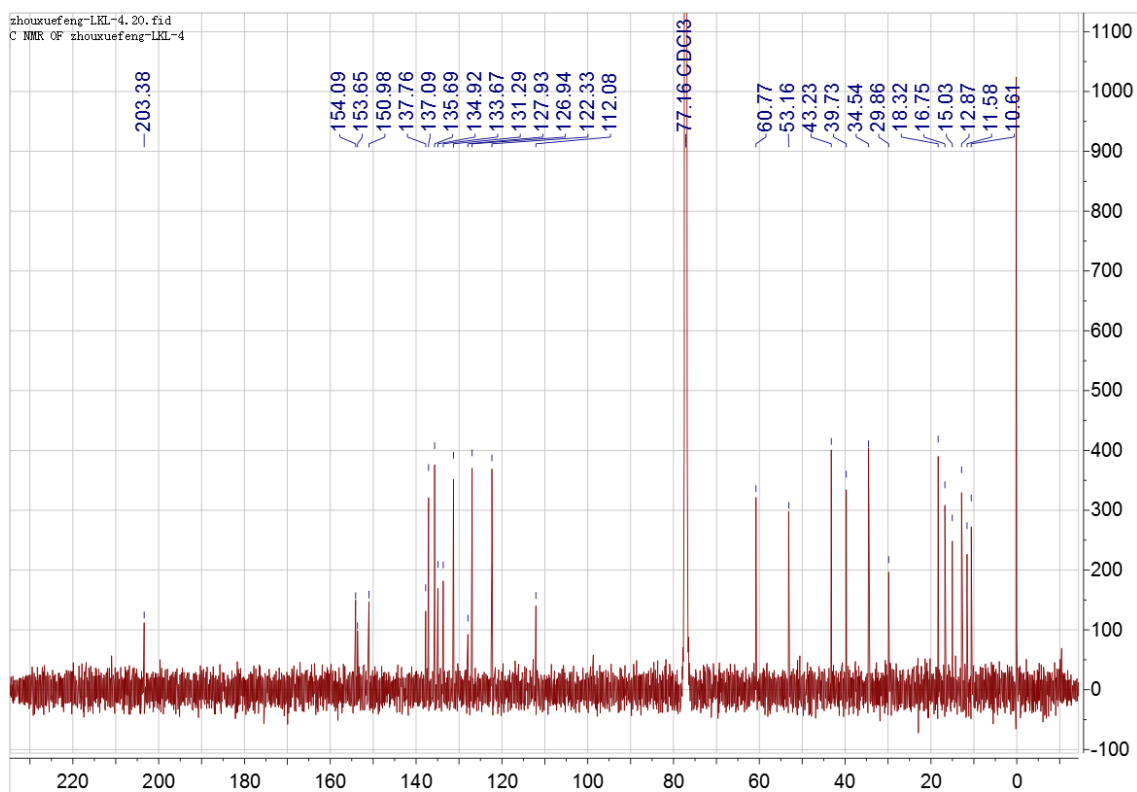

**Figure SS-5-4.**  $^{13}\text{C}$  NMR spectrum of **5** (in  $\text{CDCl}_3$ , 175 MHz).

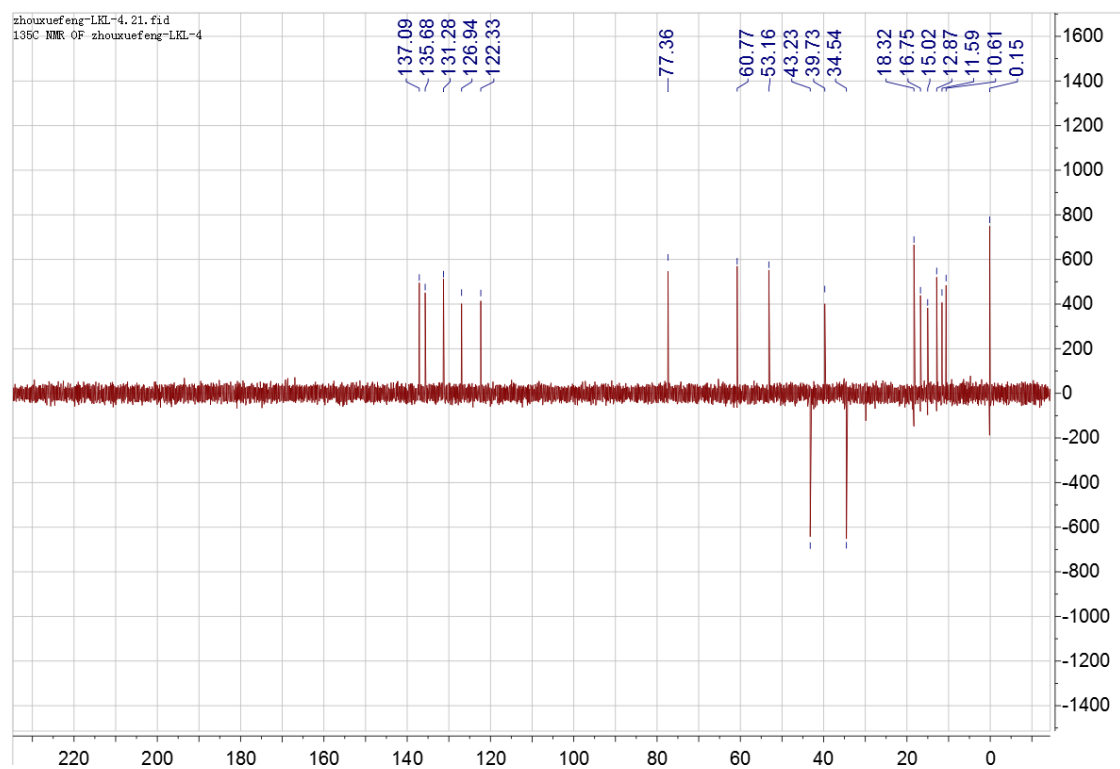

**Figure SS-5-5.** DEPT spectrum of **5** (in  $\text{CDCl}_3$ , 175 MHz).

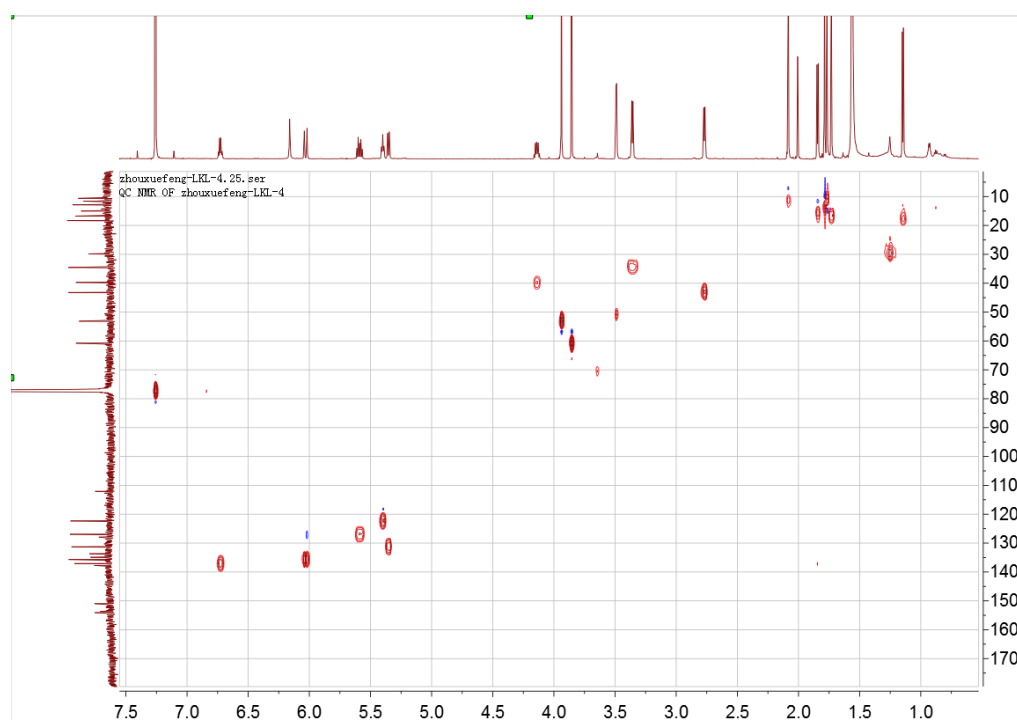

**Figure SS-5-6.** HSQC spectrum of **5** (in  $\text{CDCl}_3$ ).



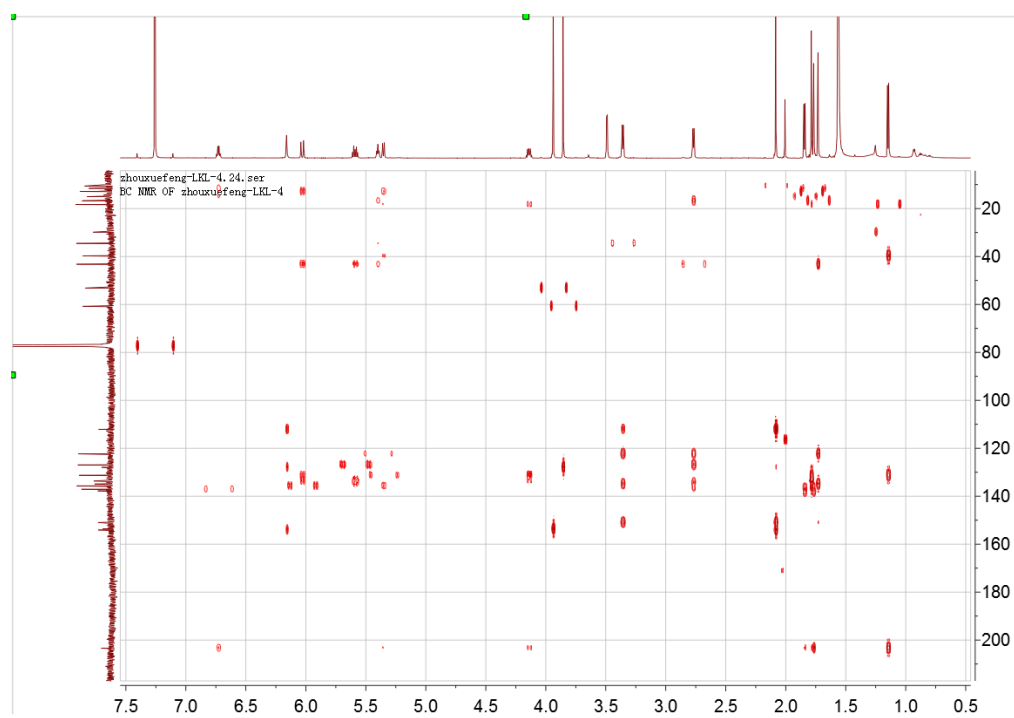

**Figure SS-5-7.** HMBC spectrum of **5** (in  $\text{CDCl}_3$ ).

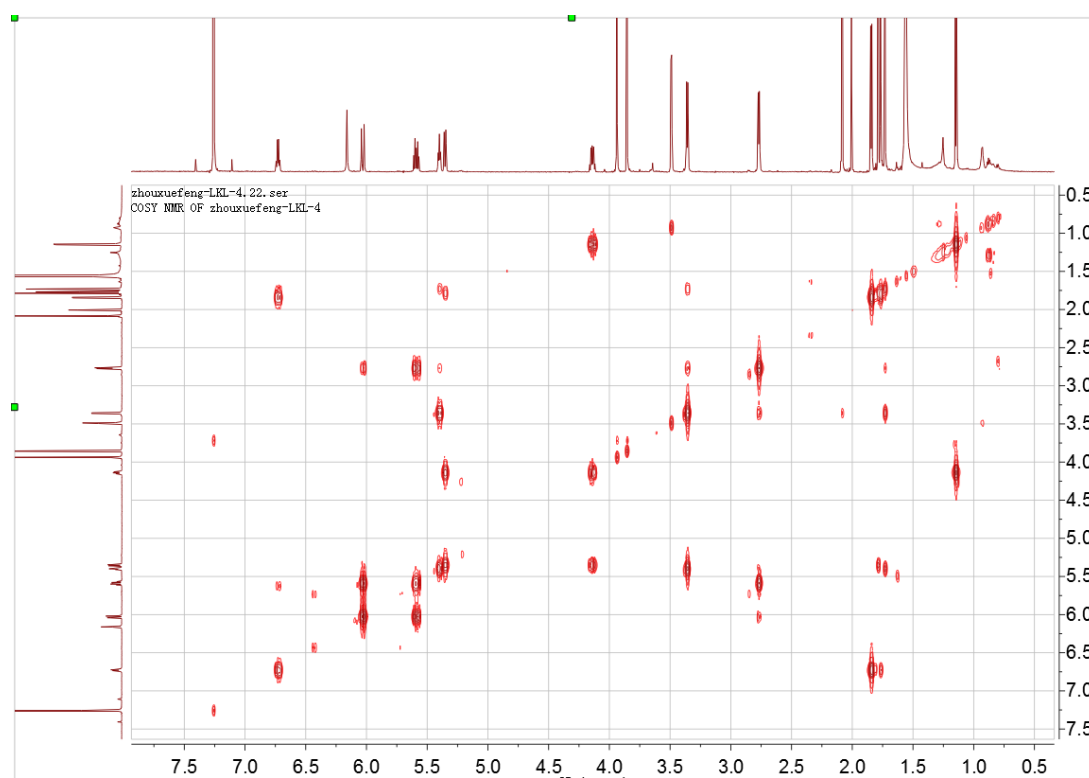

**Figure SS-5-8.**  $^1\text{H}$ - $^1\text{H}$  COSY spectrum of **5** (in  $\text{CDCl}_3$ ).

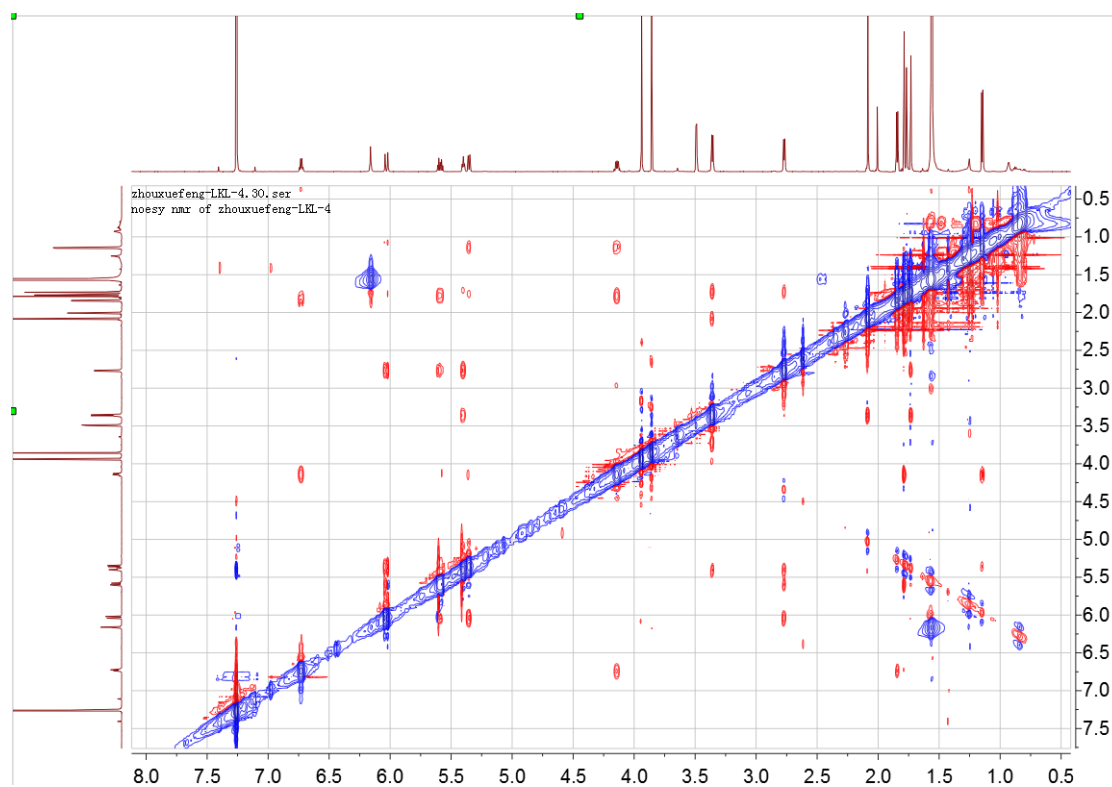

Figure SS-5-9. NOESY spectrum of **5** (in  $\text{CDCl}_3$ ).

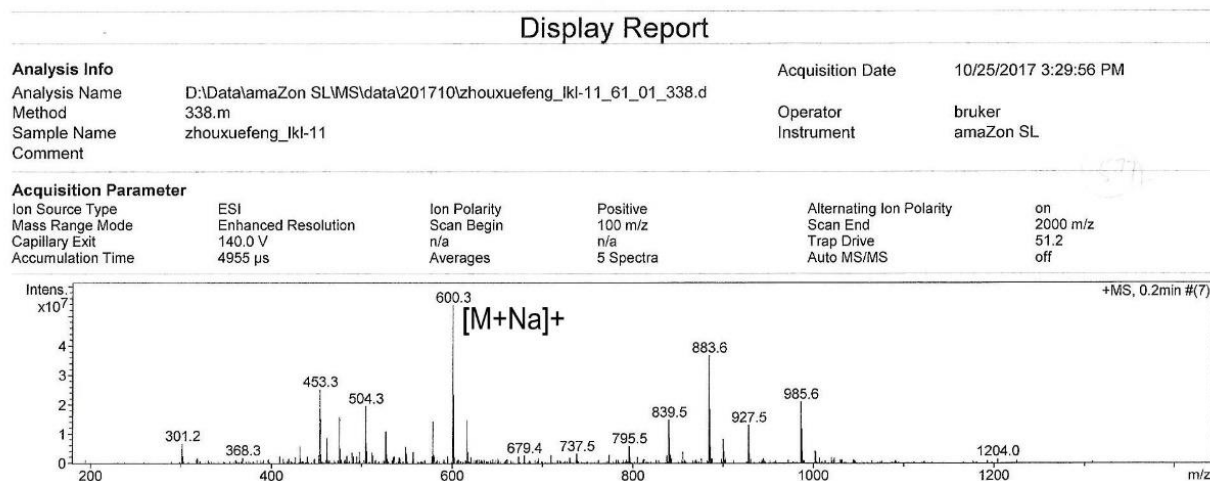

Figure SS-6-1. ESIMS (+) spectrum of **10**.

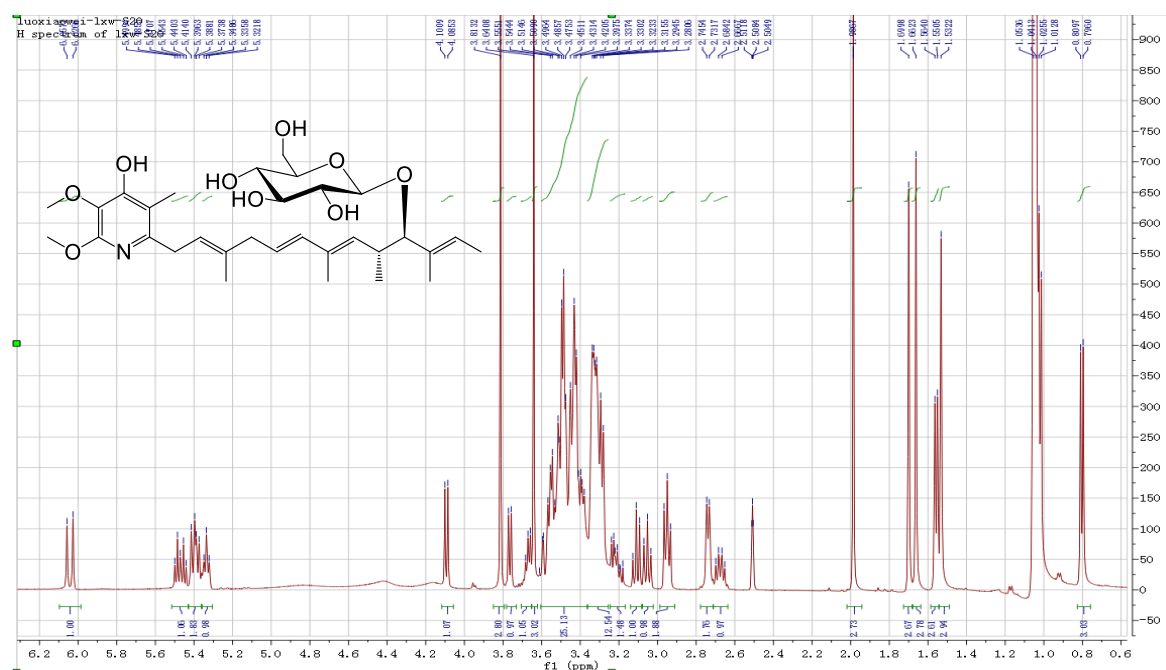

**Figure SS-6-2.** <sup>1</sup>H NMR spectrum of **10** (in DMSO-*d*<sub>6</sub>, 700 MHz).

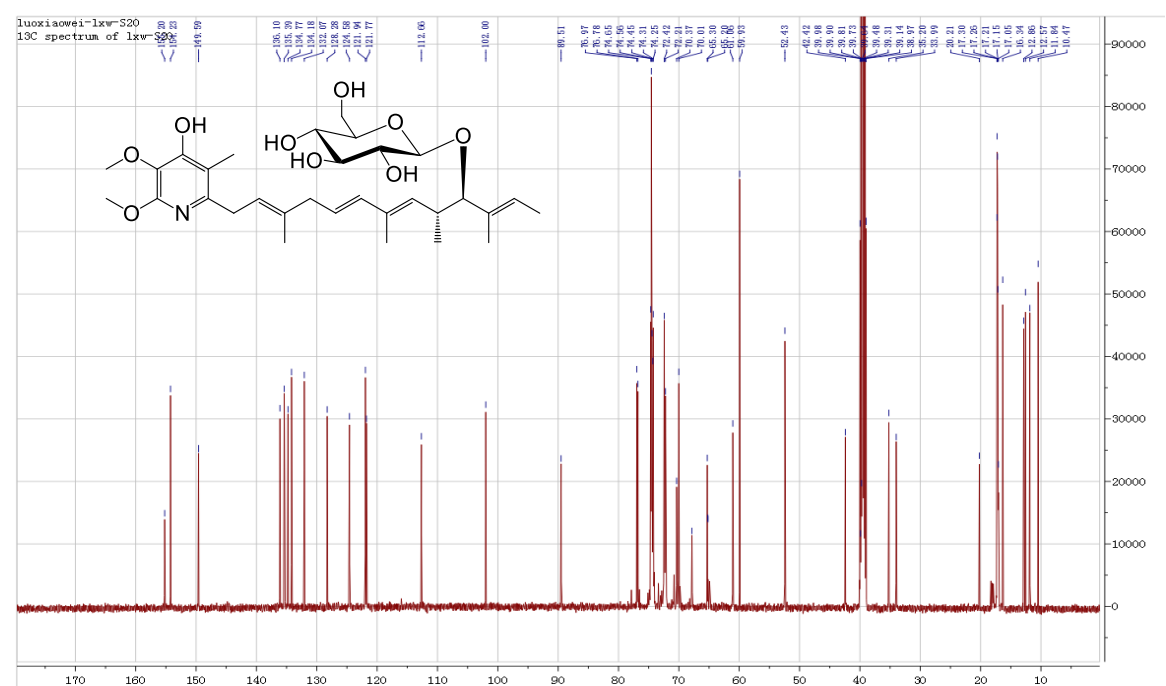

**Figure SS-6-3.** <sup>13</sup>C NMR spectrum of **10** (in DMSO-*d*<sub>6</sub>, 175 MHz).

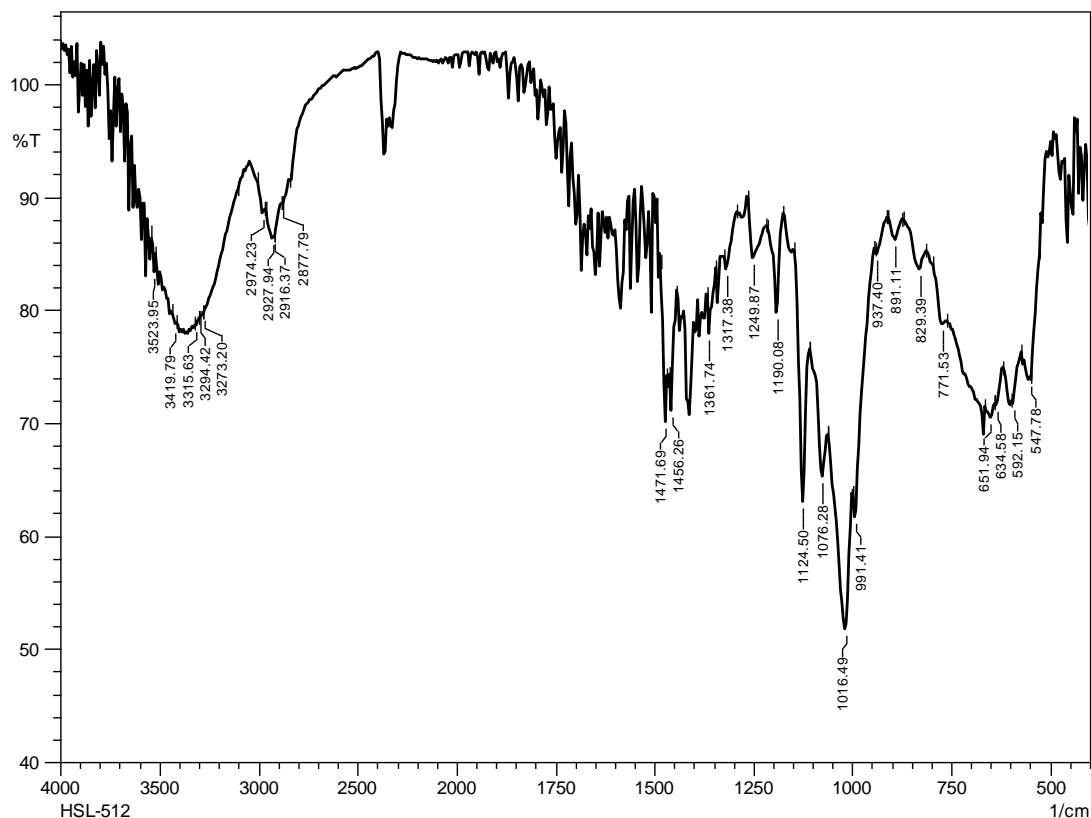

Figure SS-7-1. IR spectrum of 12.

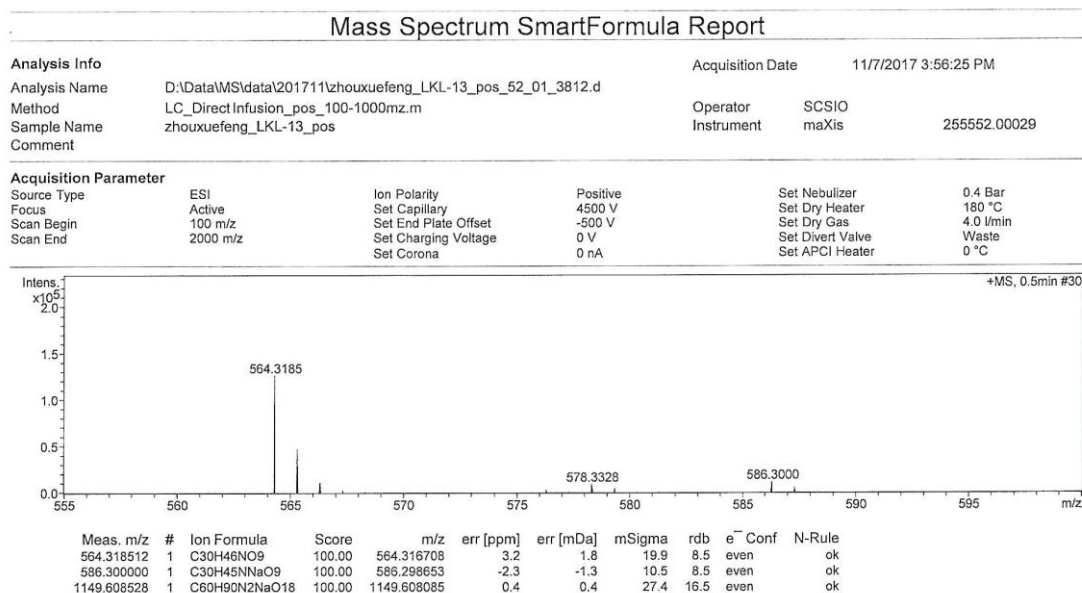

Figure SS-7-2. HRESIMS (+) spectrum of 12.

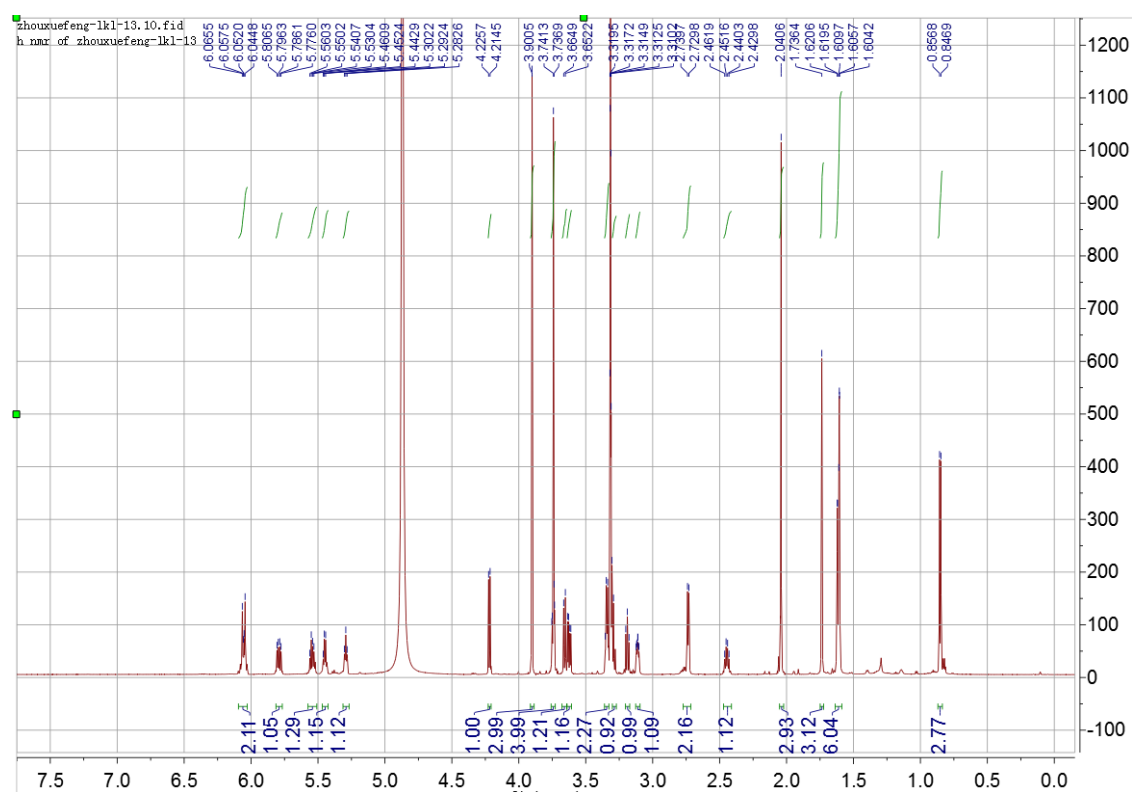

**Figure SS-7-3.** <sup>1</sup>H NMR spectrum of **12** (in CD<sub>3</sub>OD, 700 MHz).

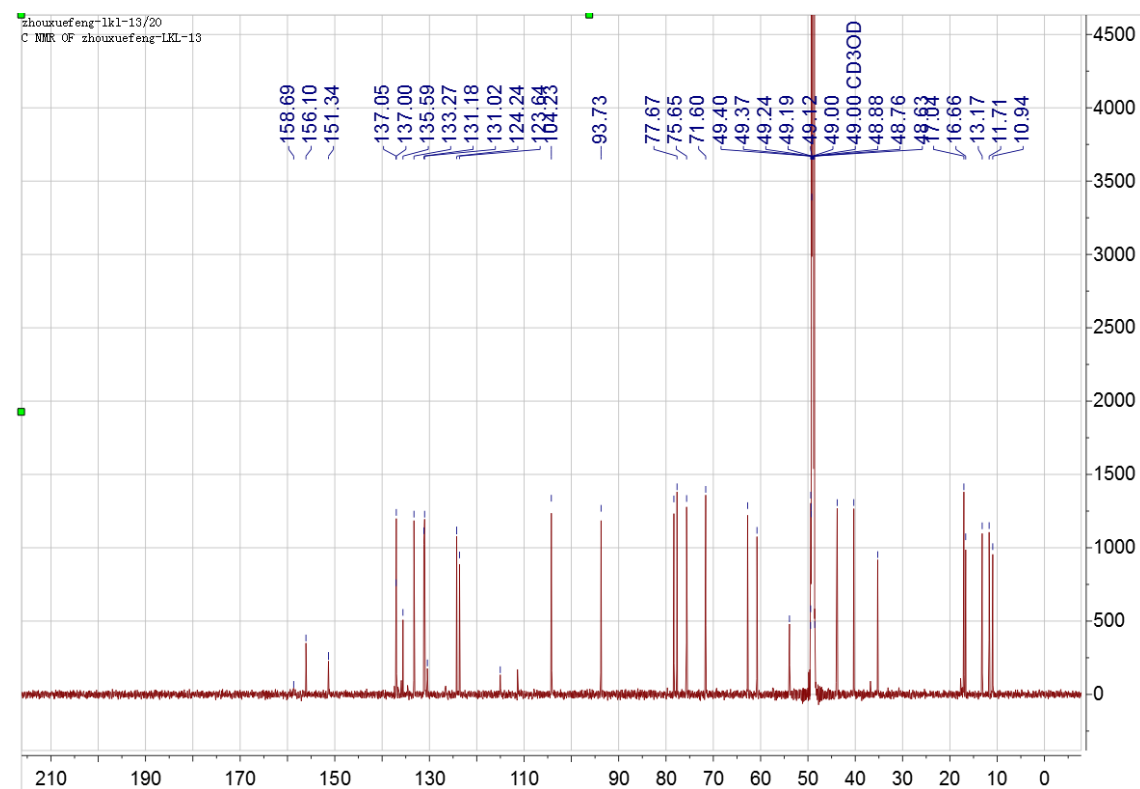

**Figure SS-7-4.** <sup>13</sup>C NMR spectrum of **12** (in CD<sub>3</sub>OD, 175 MHz).

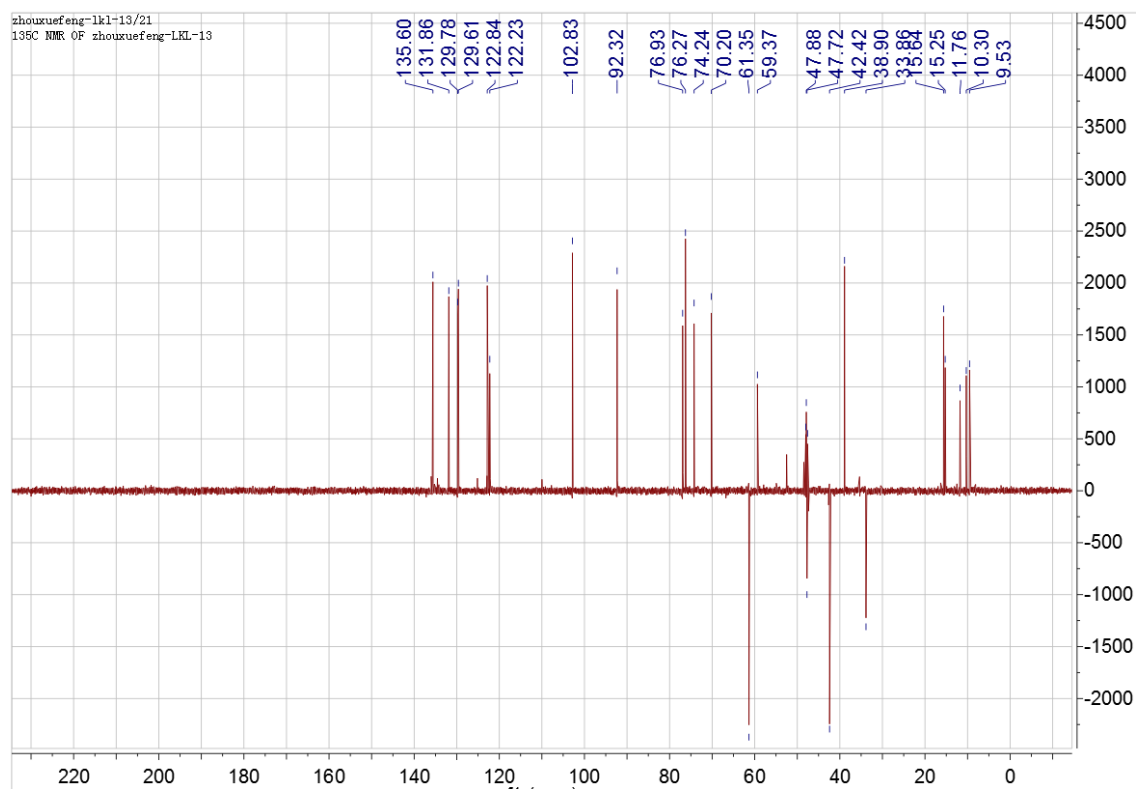

**Figure SS-7-5.** DEPT spectrum of **12** (in CD<sub>3</sub>OD, 175 MHz).

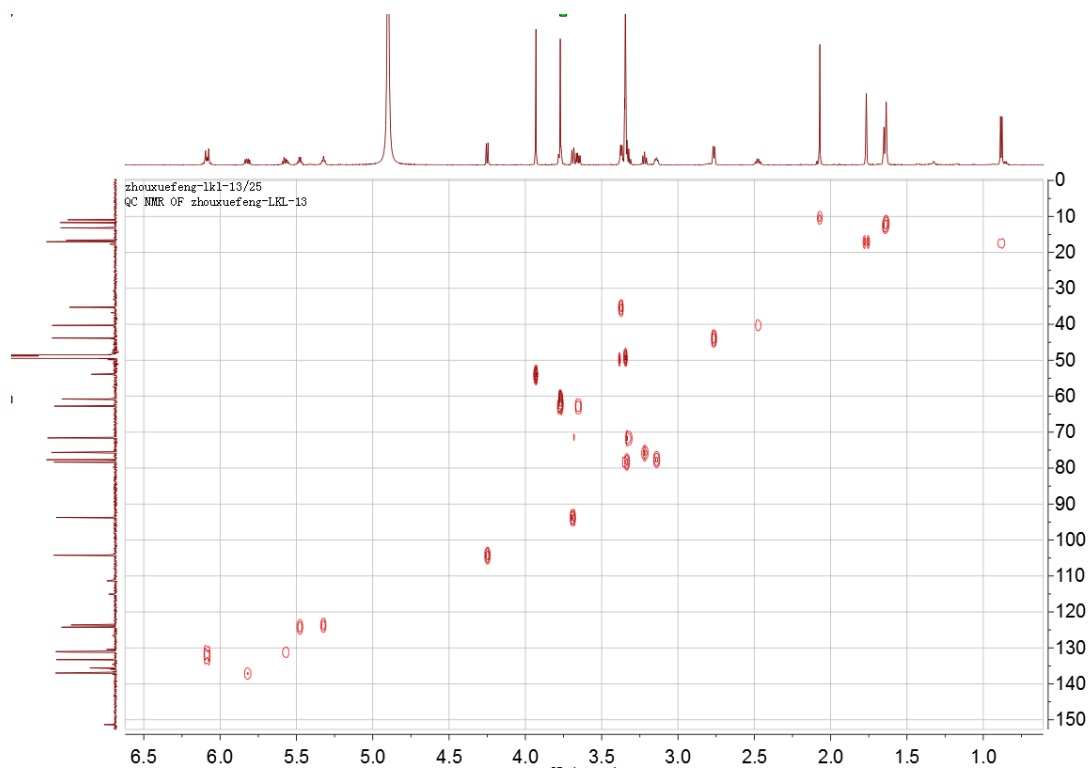

**Figure SS-7-6.** HSQC spectrum of **12** (in CD<sub>3</sub>OD).

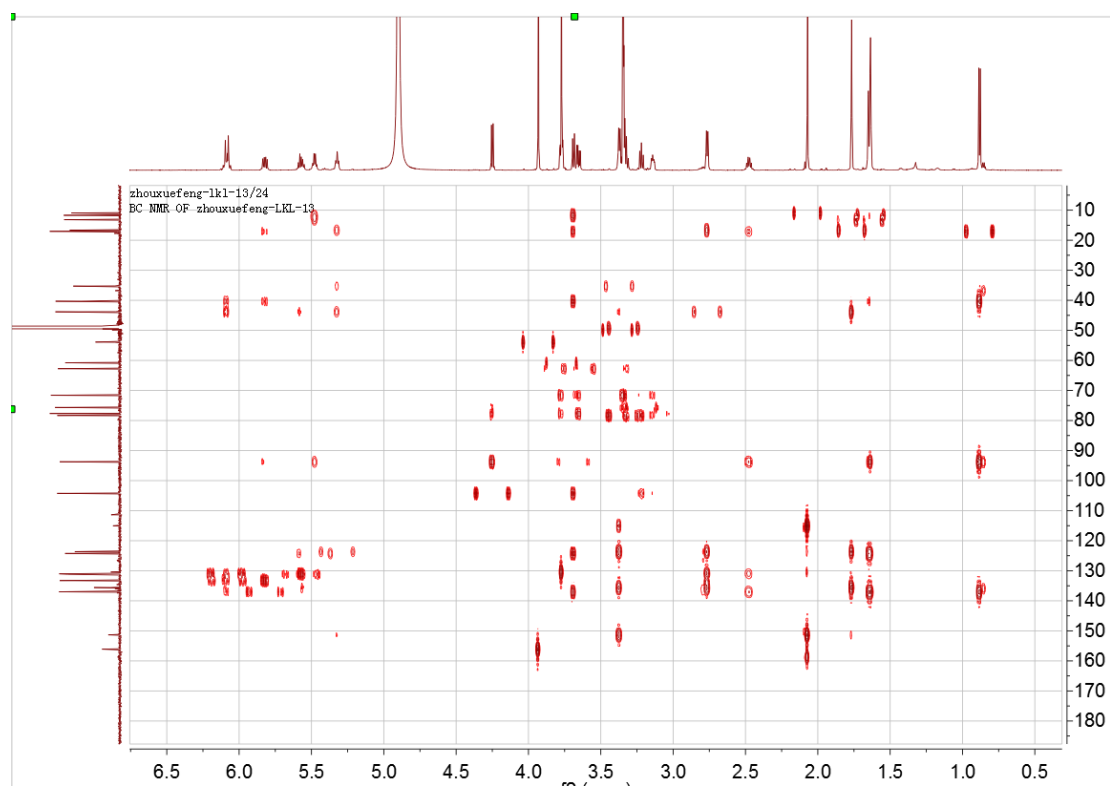

**Figure SS-7-7.** HMBC spectrum of **12** (in CD<sub>3</sub>OD).

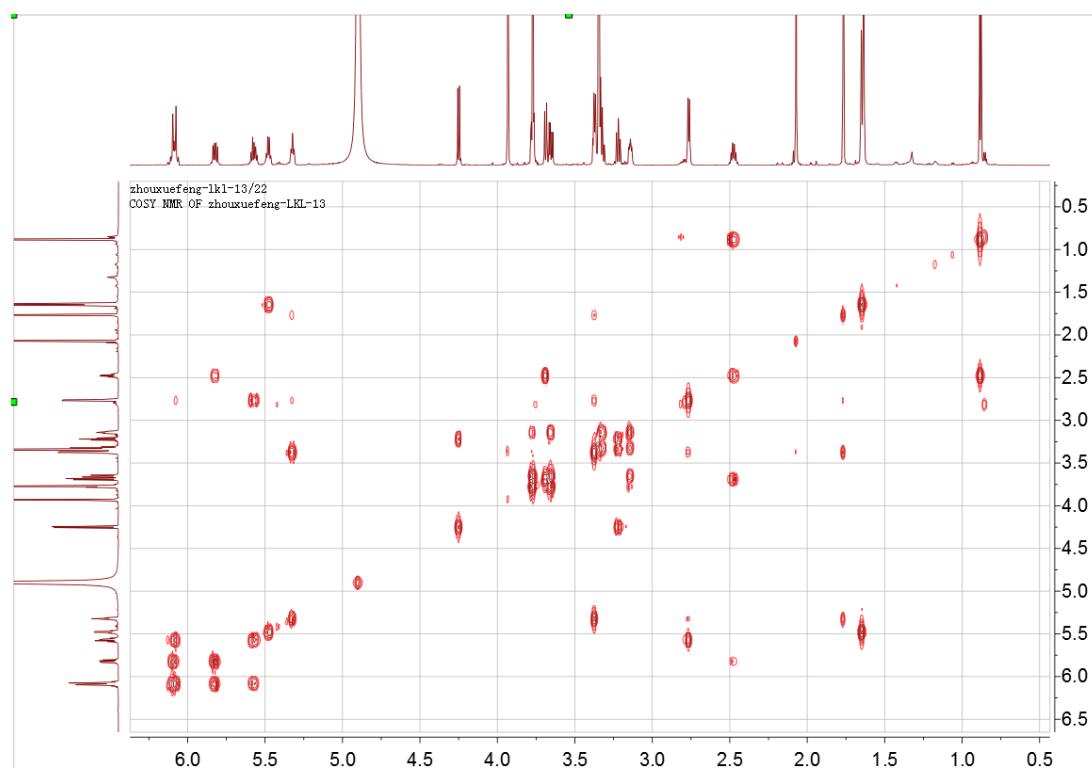

**Figure SS-7-8.** <sup>1</sup>H-<sup>1</sup>H COSY spectrum of **12** (in CD<sub>3</sub>OD).

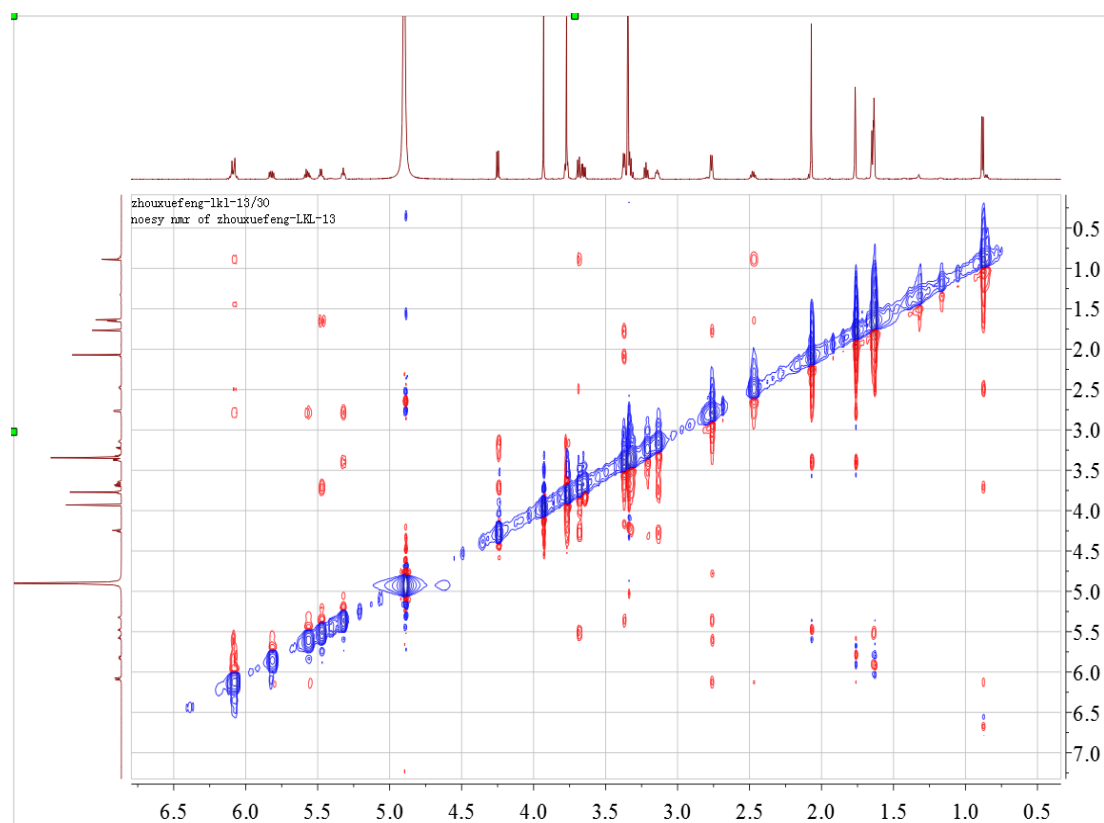

Figure SS-7-9. NOESY spectrum of **12** (in CD<sub>3</sub>OD).

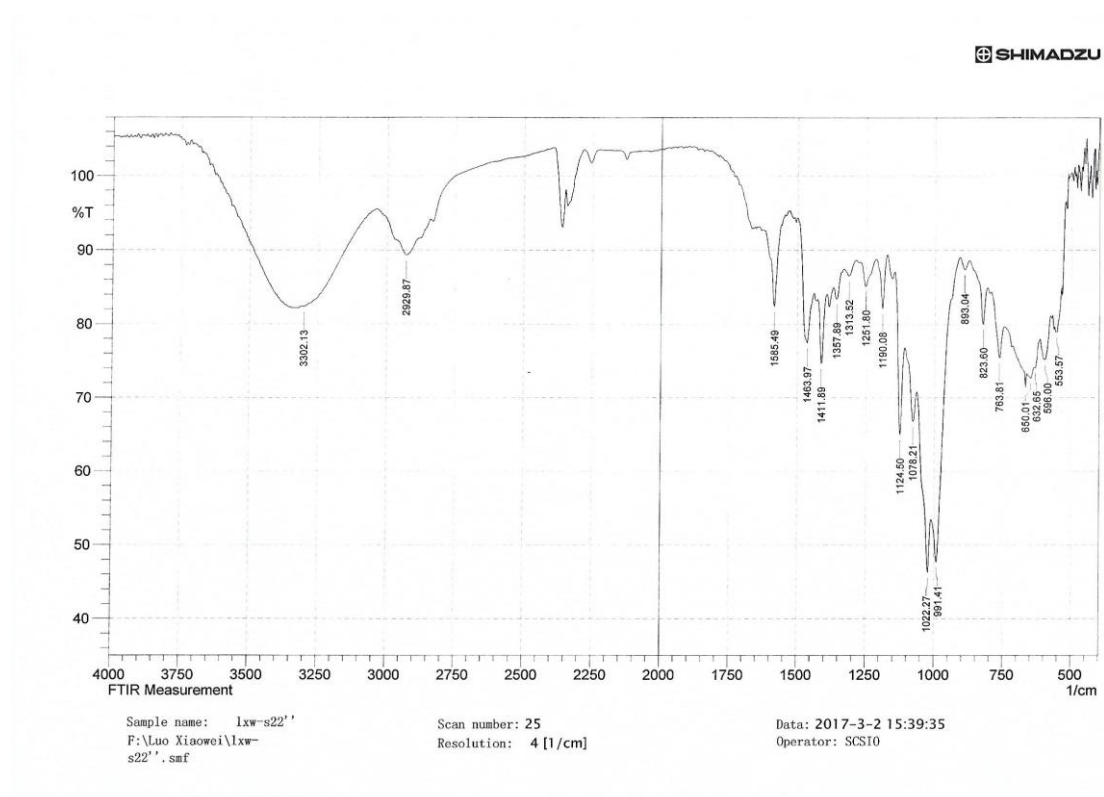

Figure SS-8-1. IR spectrum of **13**.





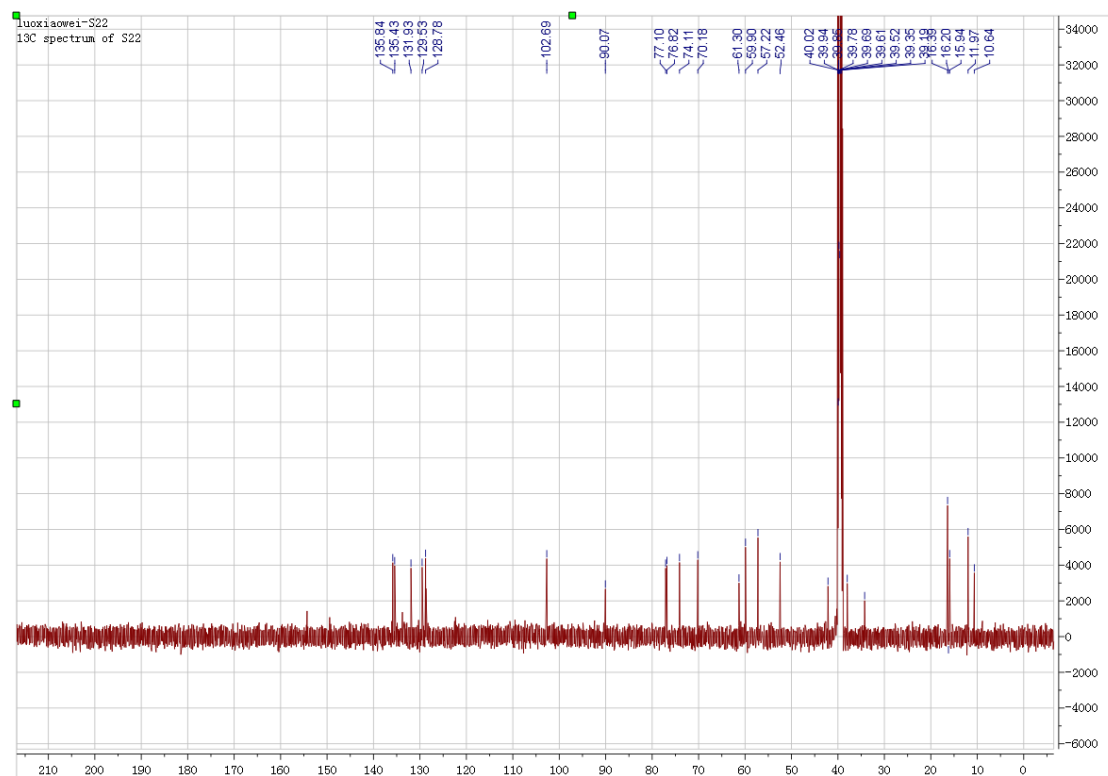

**Figure SS-8-4.**  $^{13}\text{C}$  NMR spectrum of **13** (in  $\text{DMSO}-d_6$ , 175 MHz).

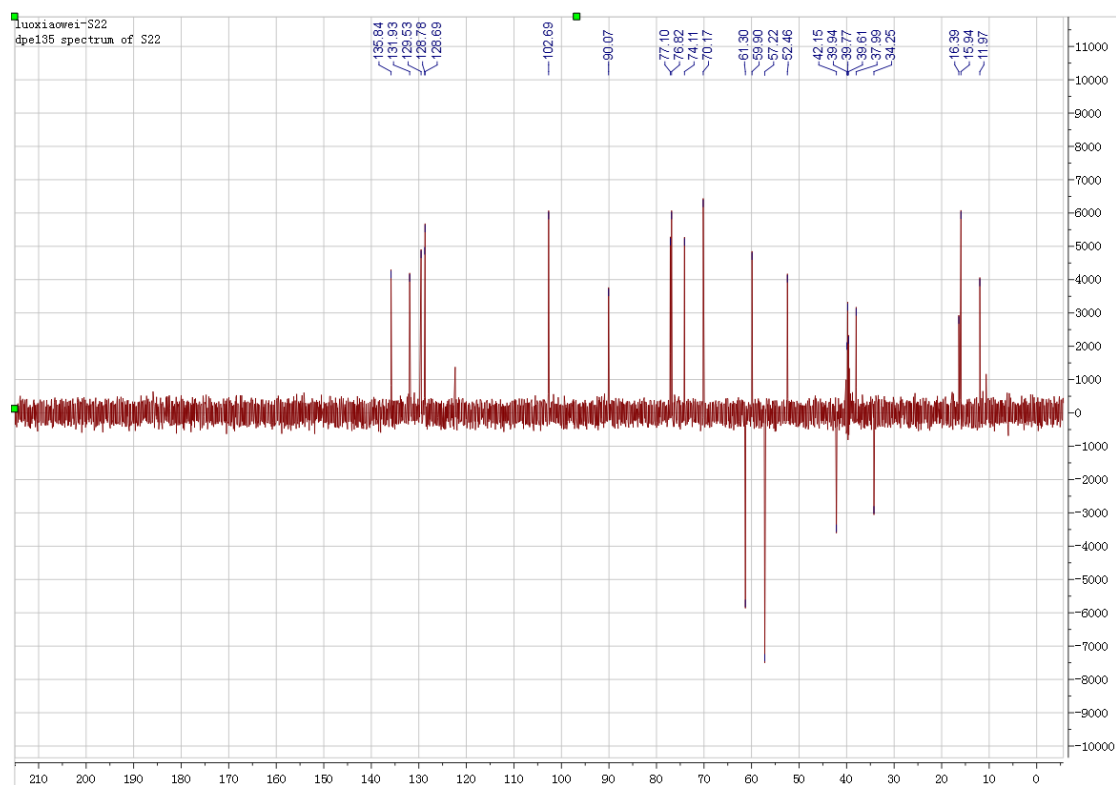

**Figure SS-8-5.** DEPT spectrum of **13** (in  $\text{DMSO}-d_6$ , 175 MHz).

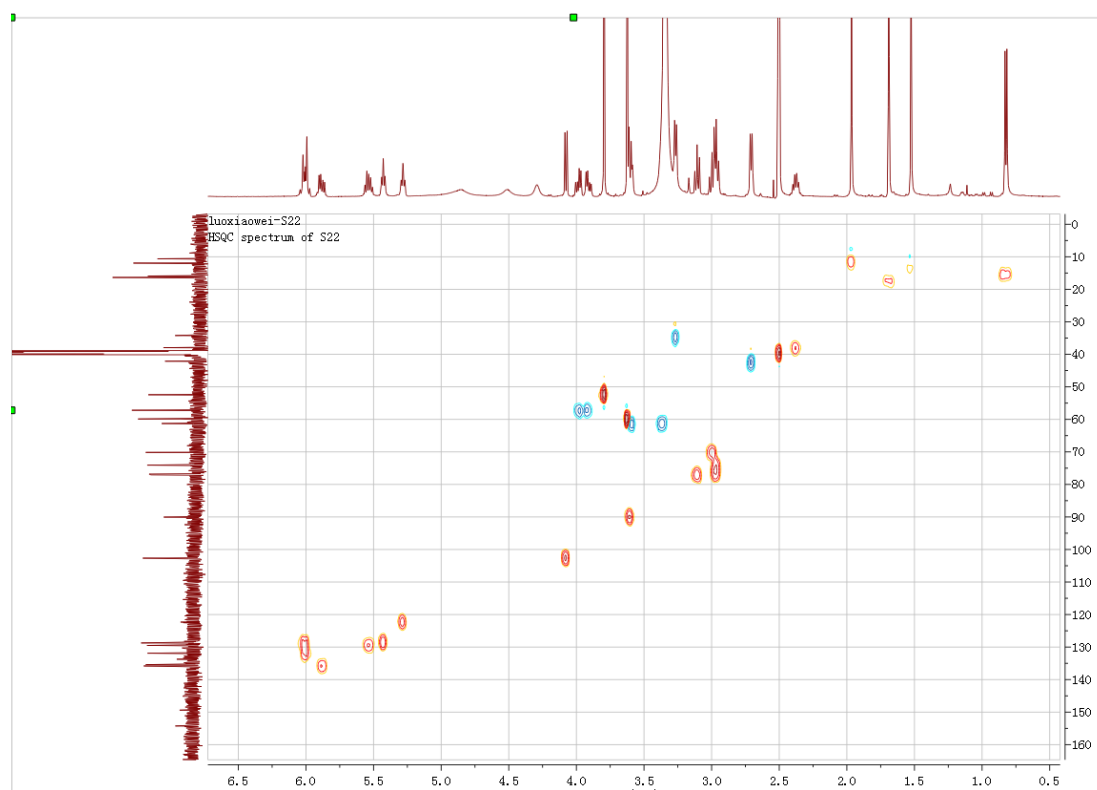

**Figure SS-8-6.** HSQC spectrum of **13** (in DMSO- $d_6$ ).

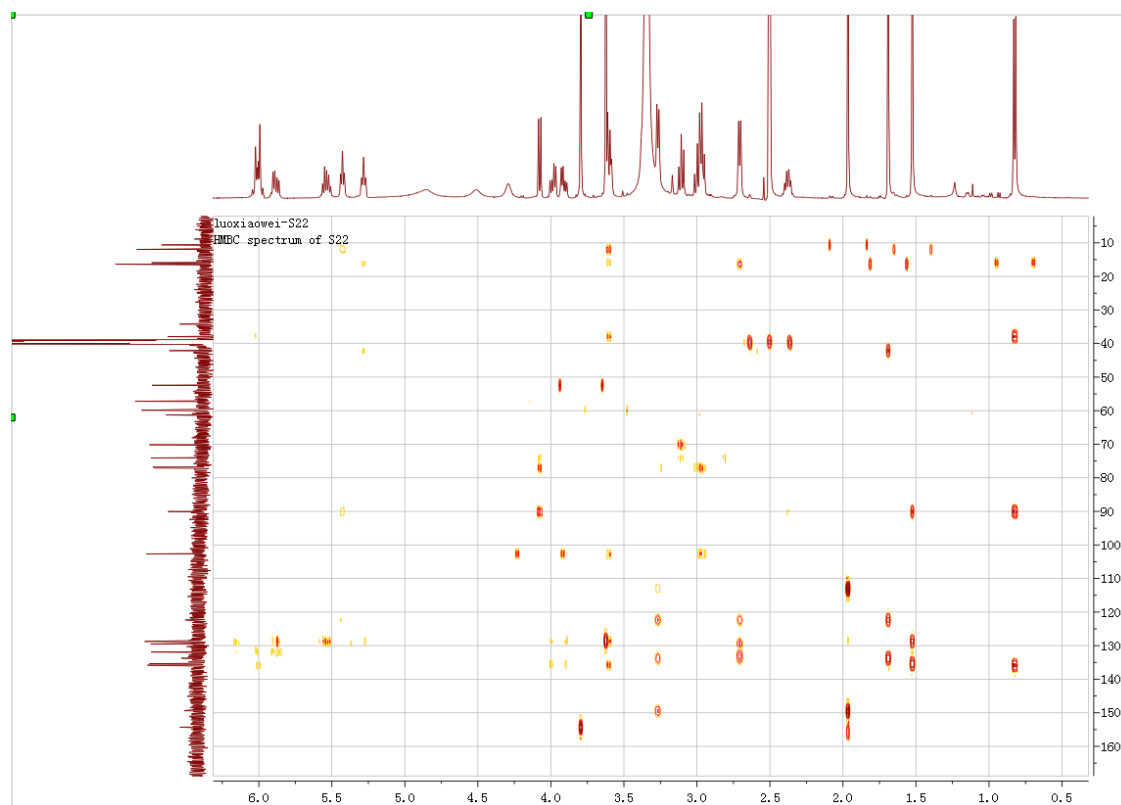

**Figure SS-8-7.** HMBC spectrum of **13** (in DMSO- $d_6$ ).

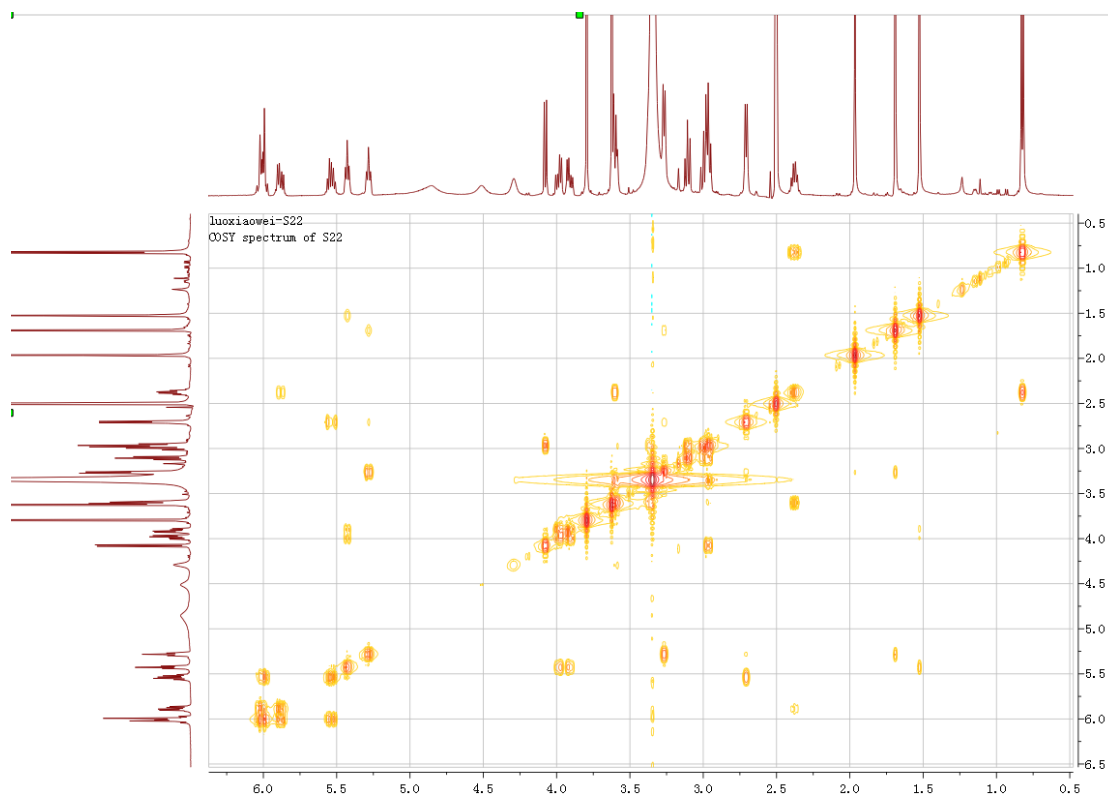

**Figure SS-8-8.**  $^1\text{H}$ - $^1\text{H}$  COSY spectrum of **13** (in  $\text{DMSO}-d_6$ ).

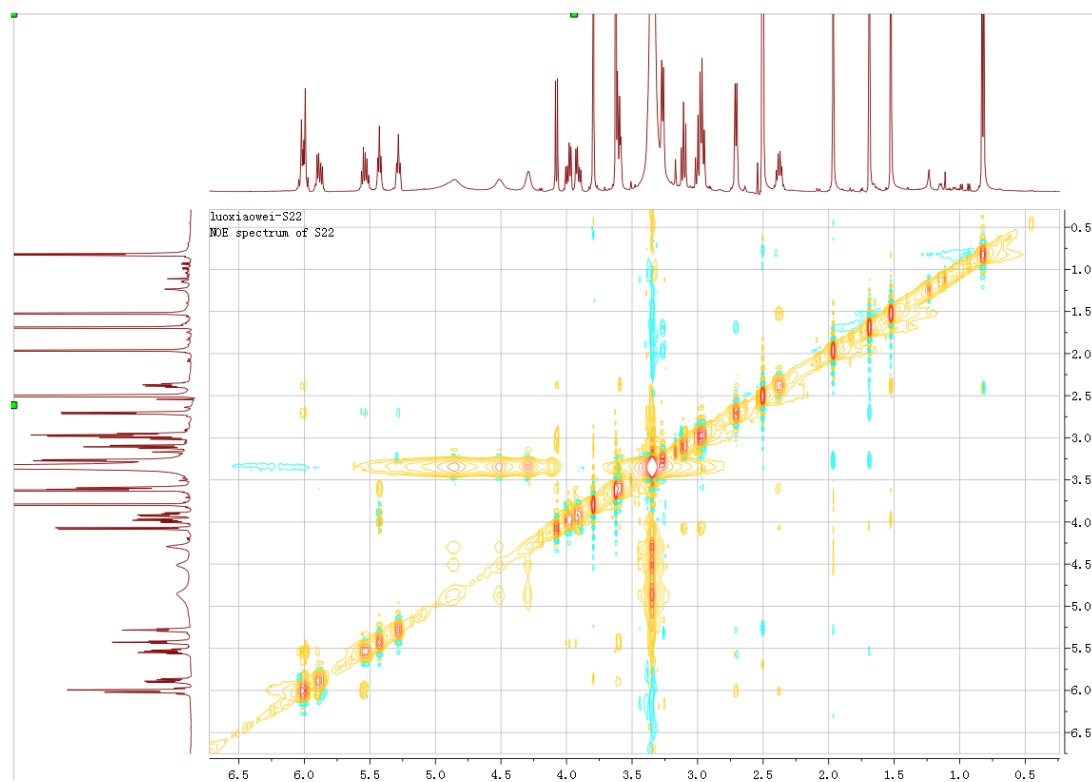

**Figure SS-8-9.** NOESY spectrum of **13** (in  $\text{DMSO}-d_6$ ).

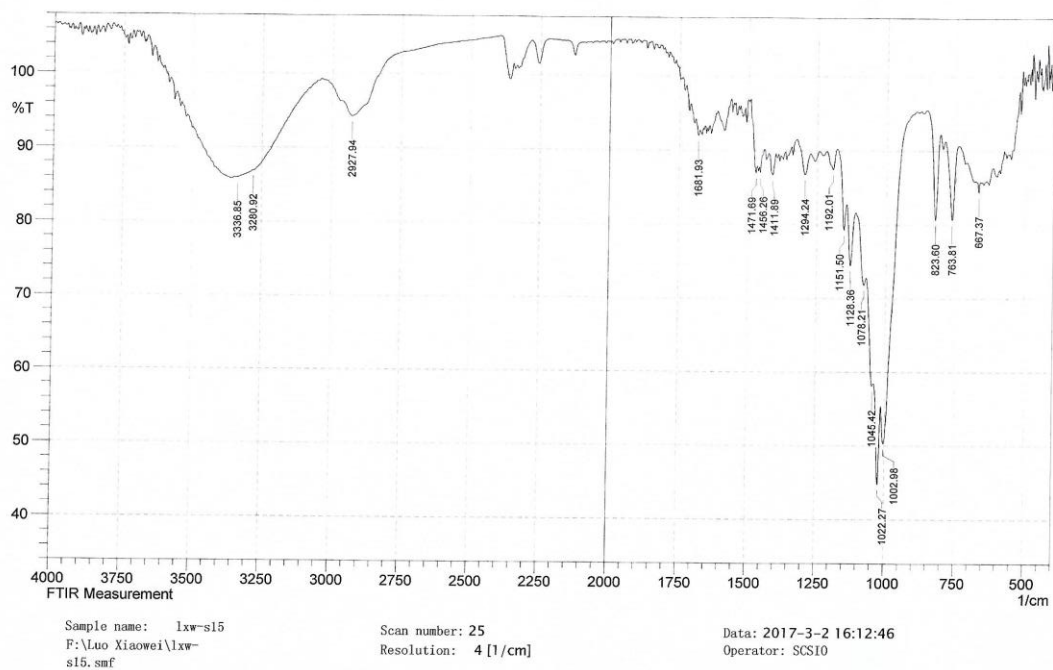

Figure SS-9-1. IR spectrum of 14.

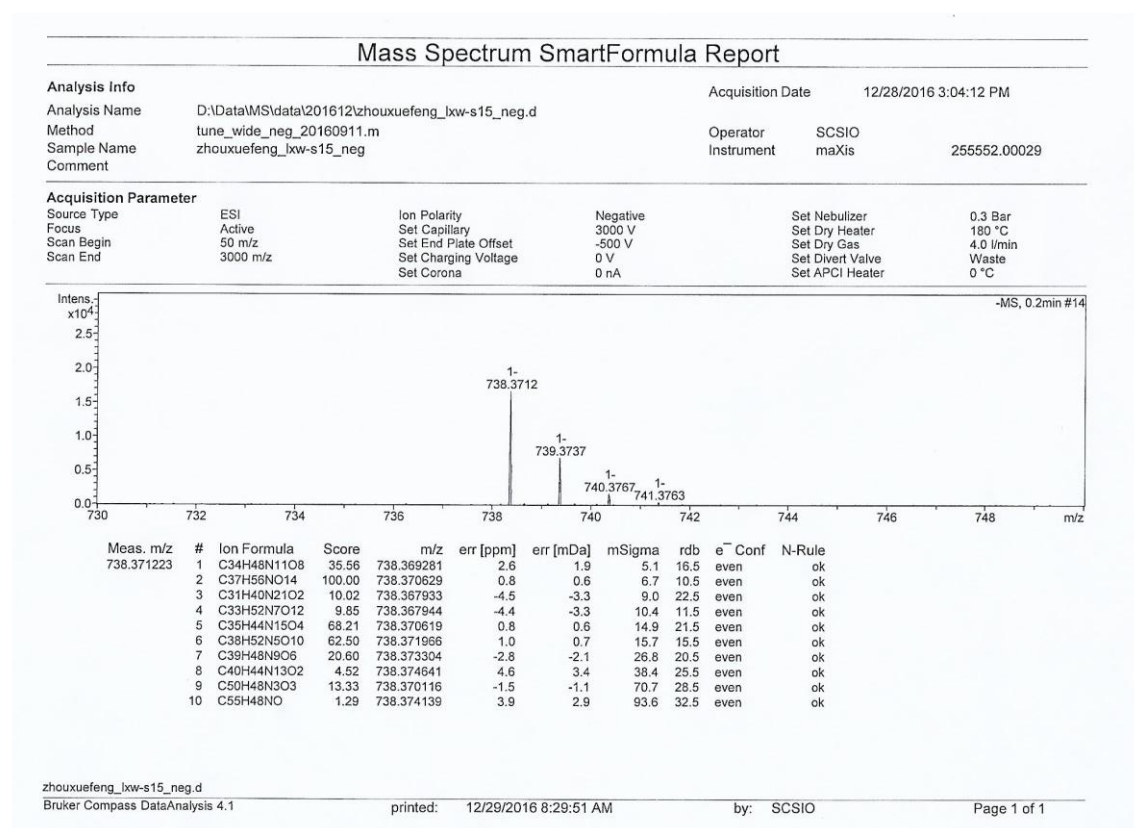

Figure SS-9-2. HRESIMS (-) spectrum of 14.

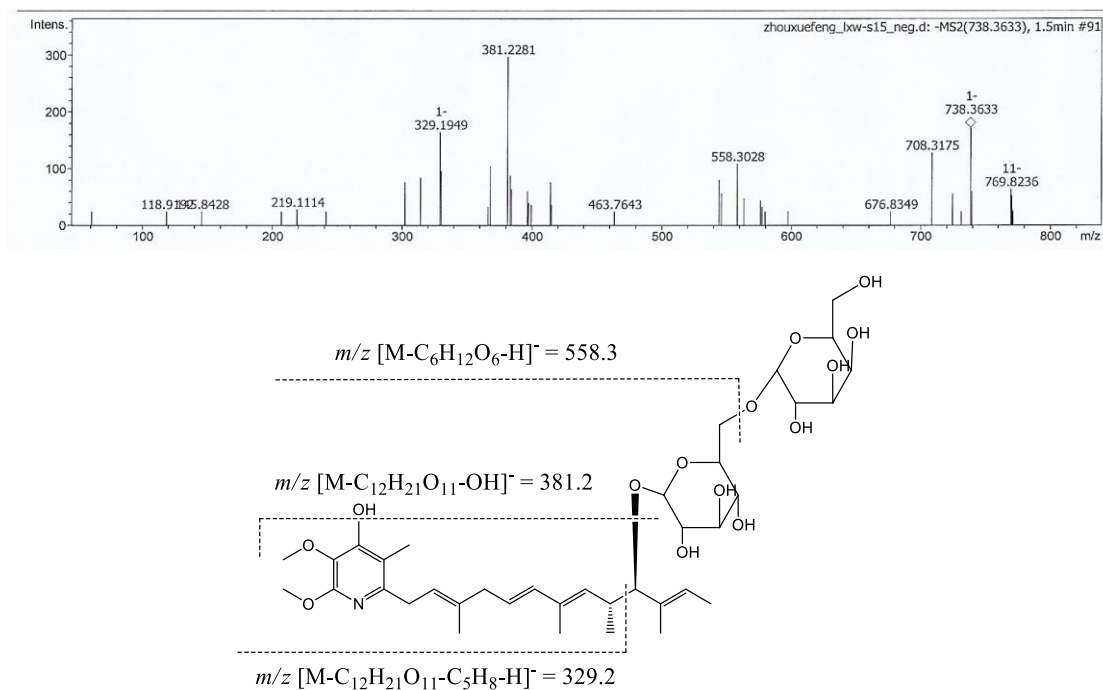

Figure SS-9-3. HRESI-MS/MS (-) spectrum of 14.

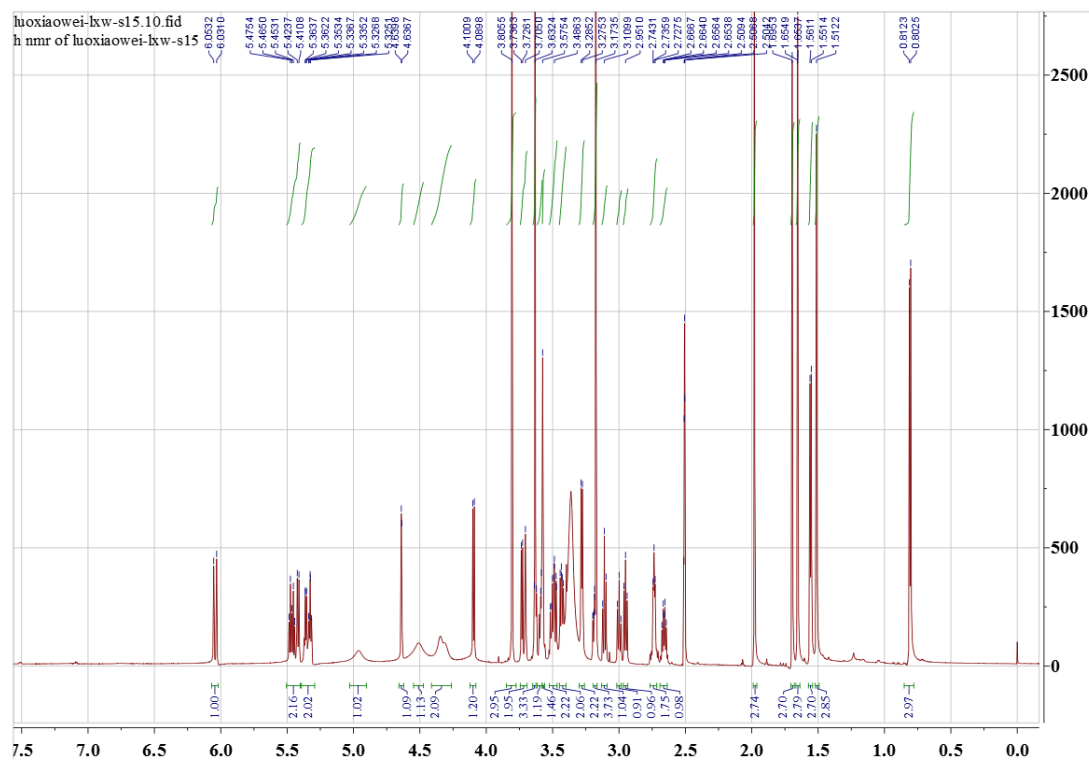

Figure SS-9-4.  $^1H$  NMR spectrum of 14 (in  $DMSO-d_6$ , 700 MHz).

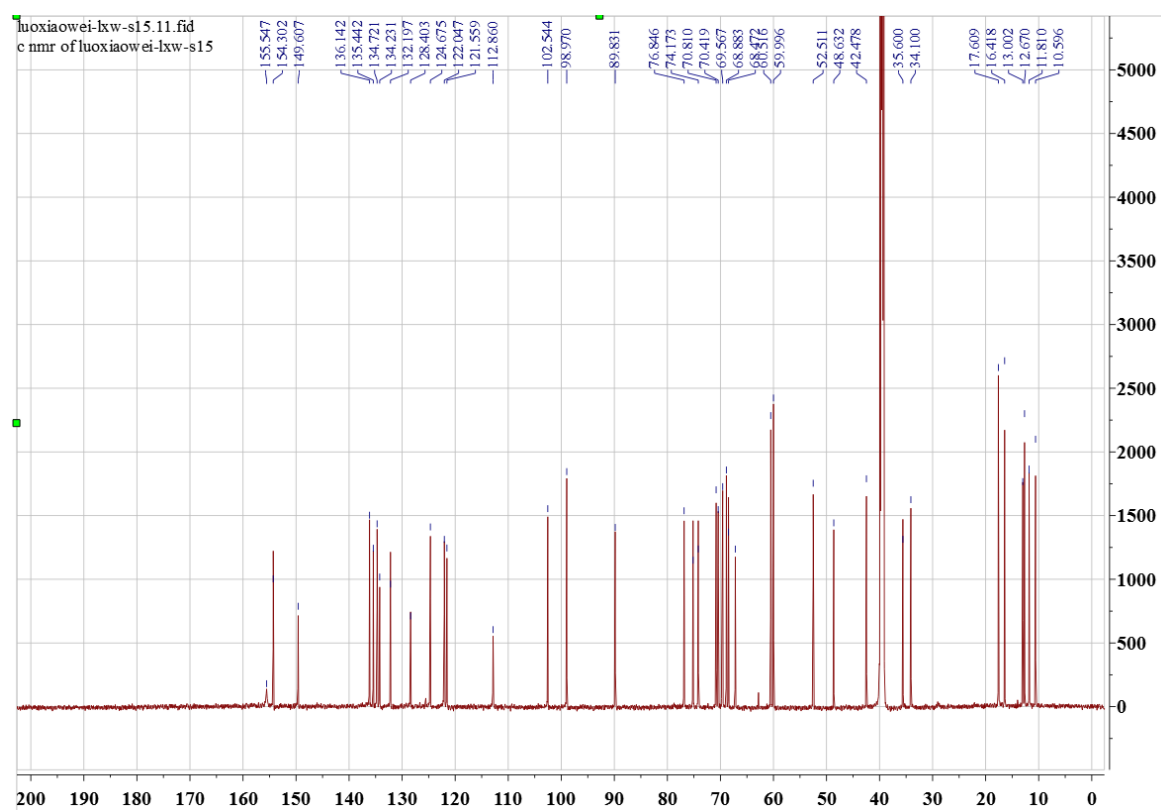

Figure SS-9-5.  $^{13}\text{C}$  NMR spectrum of **14** (in  $\text{DMSO}-d_6$ , 175 MHz).

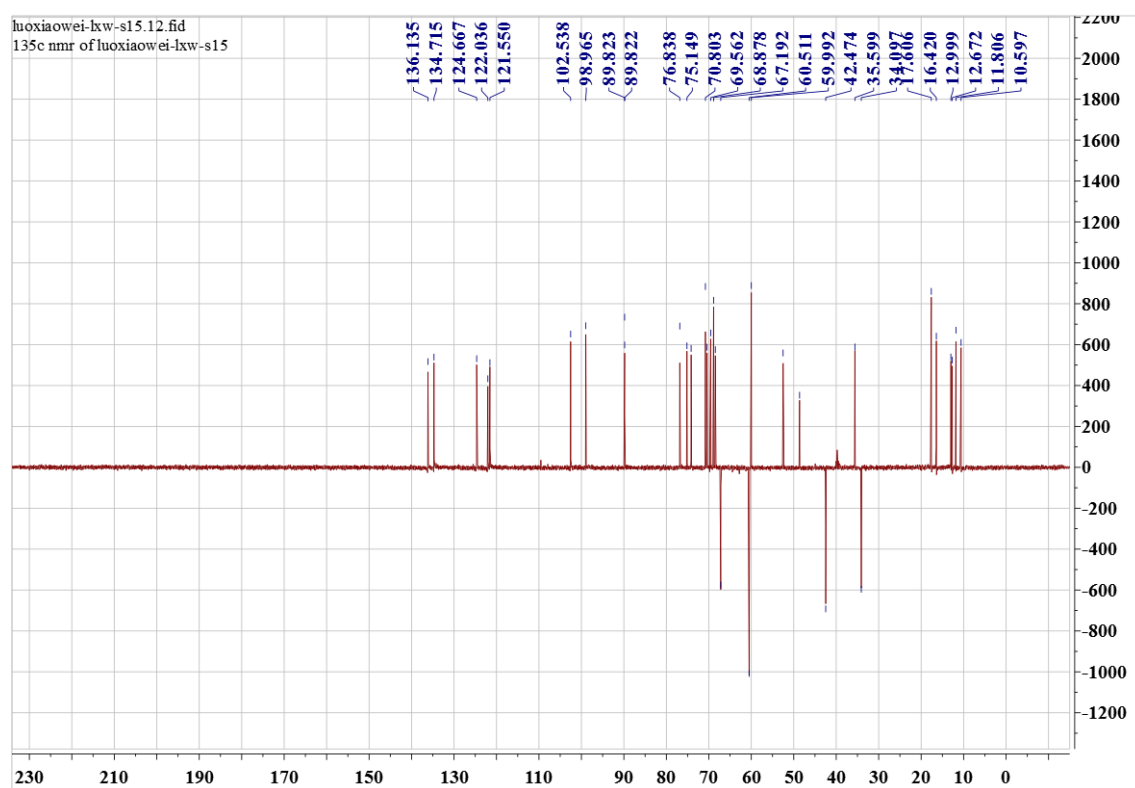

Figure SS-9-6. DEPT spectrum of **14** (in  $\text{DMSO}-d_6$ , 175 MHz).

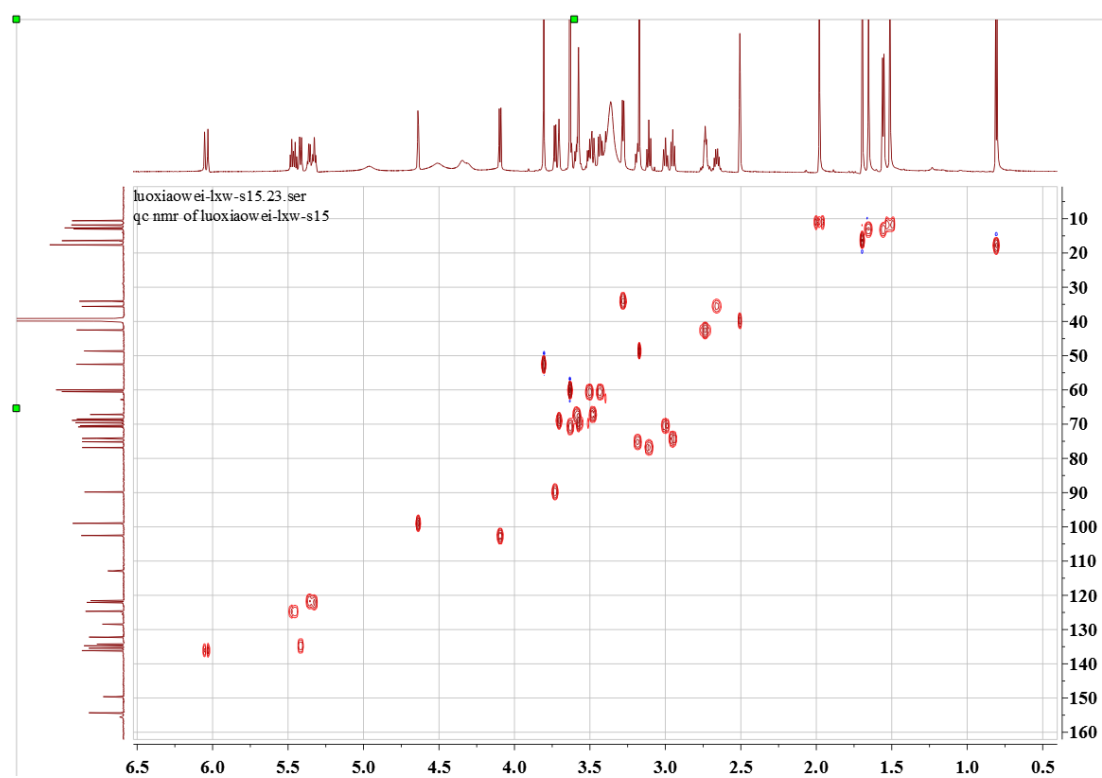

**Figure SS-9-7.** HSQC spectrum of **14** (in DMSO- $d_6$ ).

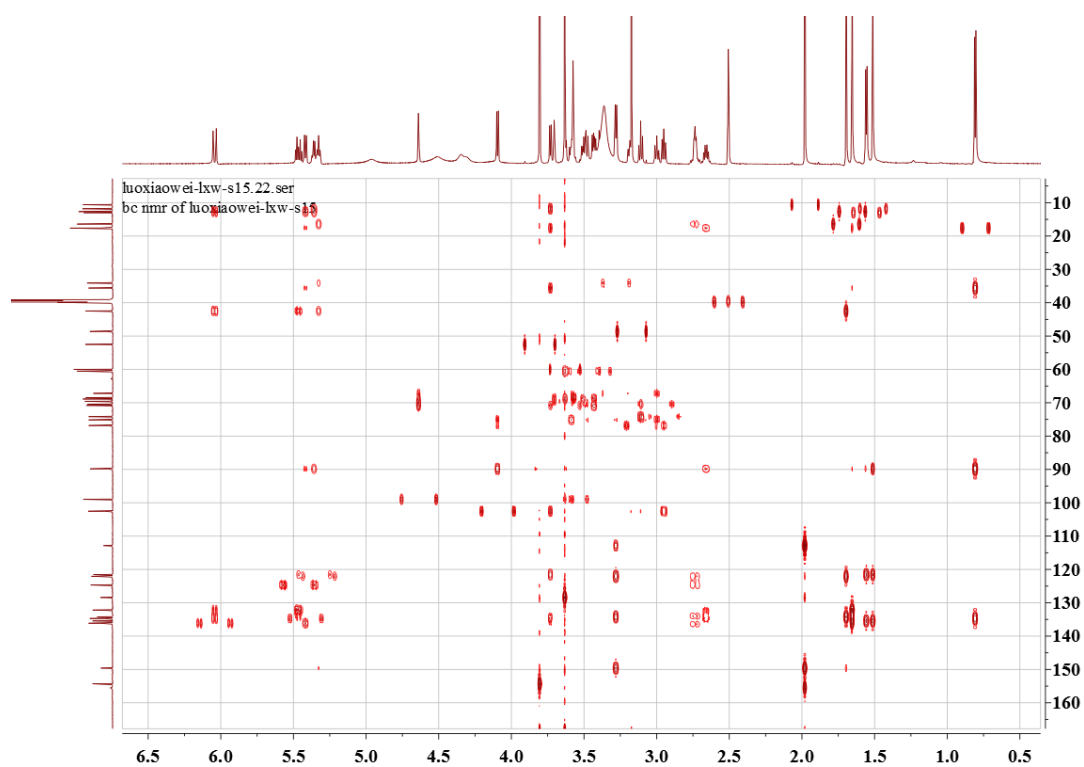

**Figure SS-9-8.** HMBC spectrum of **14** (in DMSO- $d_6$ ).



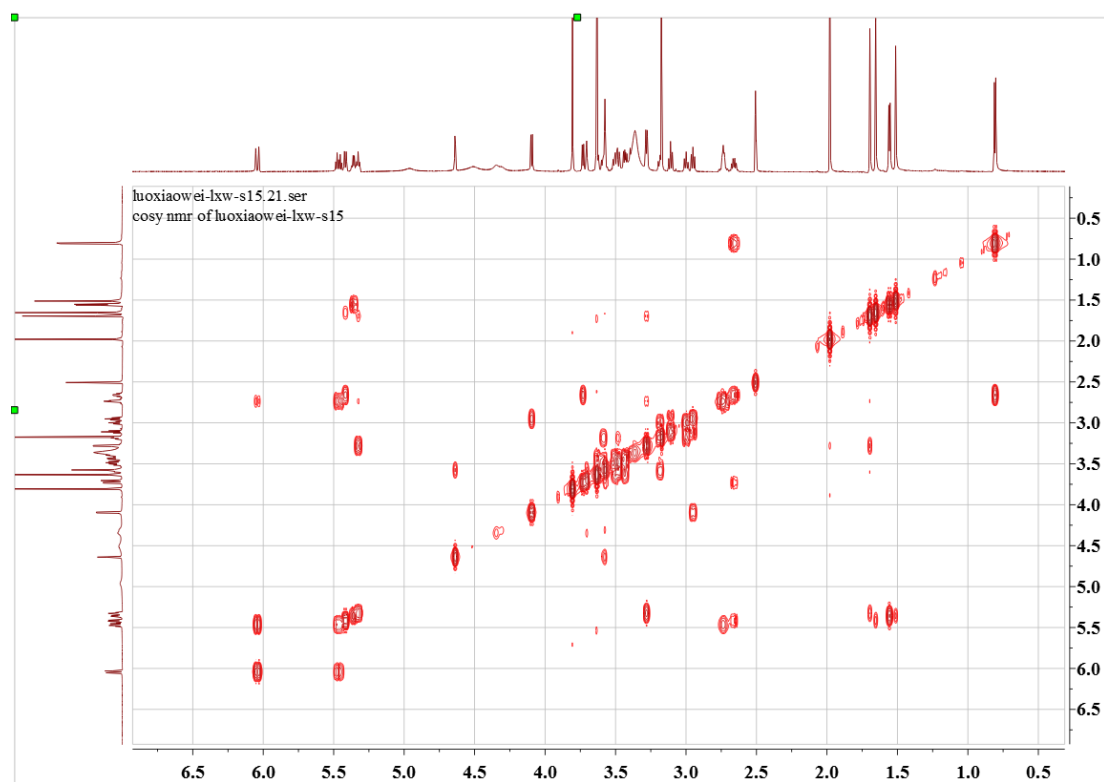

**Figure SS-9-9.**  $^1\text{H}$ - $^1\text{H}$  COSY spectrum of **14** (in  $\text{DMSO}-d_6$ ).

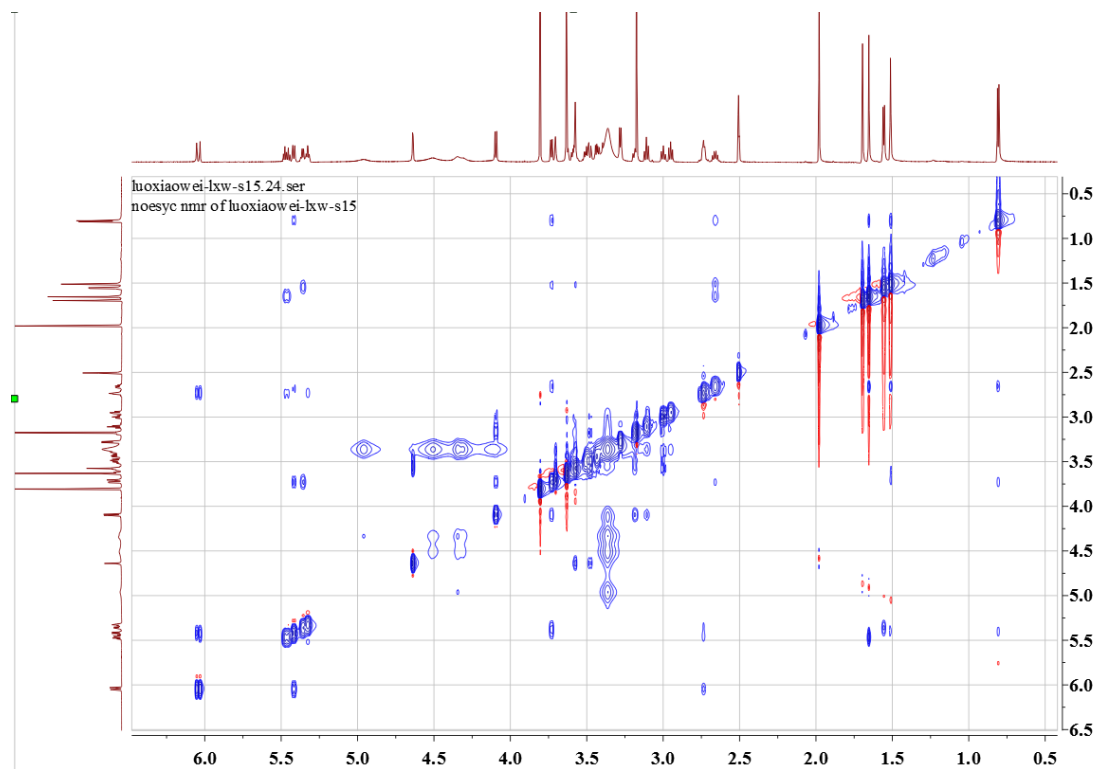

**Figure SS-9-10.** NOESY spectrum of **14** (in  $\text{DMSO}-d_6$ ).

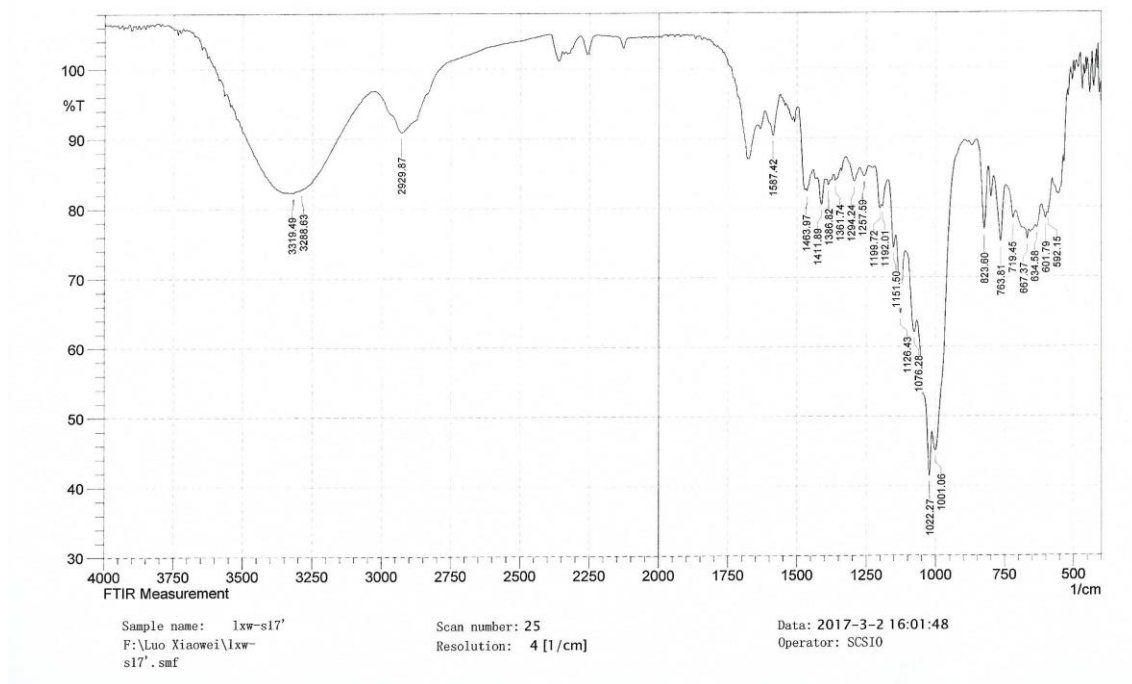

Figure SS-10-1. IR spectrum of 15.

## Mass Spectrum SmartFormula Report

|                       |                                                             |                      |                  |                  |                       |  |
|-----------------------|-------------------------------------------------------------|----------------------|------------------|------------------|-----------------------|--|
| Analysis Info         |                                                             |                      | Acquisition Date |                  | 1/13/2017 10:18:44 AM |  |
| Analysis Name         | D:\Data\MS\data\201612\zhouxuefeng_lxw-s17_neg_61_01_2955.d |                      |                  |                  |                       |  |
| Method                | LC ms2_Direct Infusion_neg_100-1000mz.m                     |                      |                  |                  |                       |  |
| Sample Name           | zhouxuefeng_lxw-s17_neg                                     |                      | Operator         | SCSIO            |                       |  |
| Comment               |                                                             |                      | Instrument       | maXis            | 255552.00029          |  |
|                       |                                                             |                      |                  |                  |                       |  |
| Acquisition Parameter |                                                             |                      |                  |                  |                       |  |
| Source Type           | ESI                                                         | Ion Polarity         | Negative         | Set Nebulizer    | 0.4 Bar               |  |
| Focus                 | Active                                                      | Set Capillary        | 3800 V           | Set Dry Heater   | 180 °C                |  |
| Scan Begin            | 100 m/z                                                     | Set End Plate Offset | 0 V              | Set Dry Gas      | 4.0 l/min             |  |
| Scan End              | 2000 m/z                                                    | Set Charging Voltage | 0 V              | Set Divert Valve | Waste                 |  |
|                       |                                                             | Set Corona           | 0 nA             | Set APCI Heater  | 0 °C                  |  |

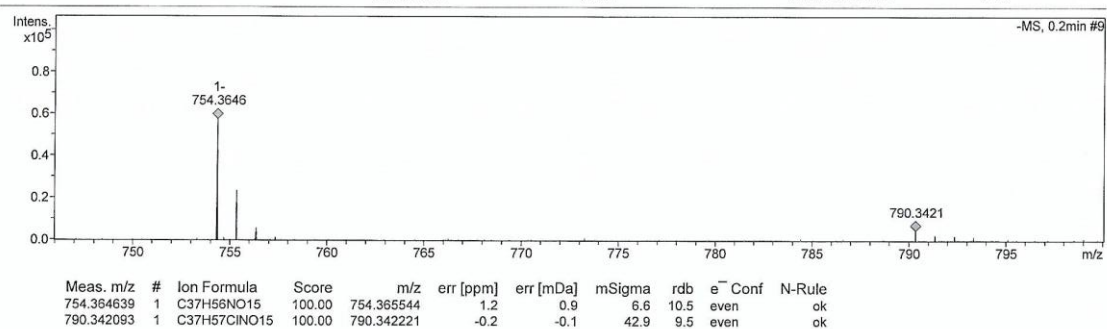

Figure SS-10-2. HRESIMS (-) spectrum of 15.

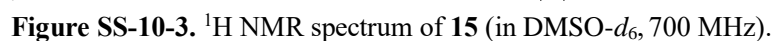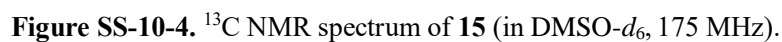

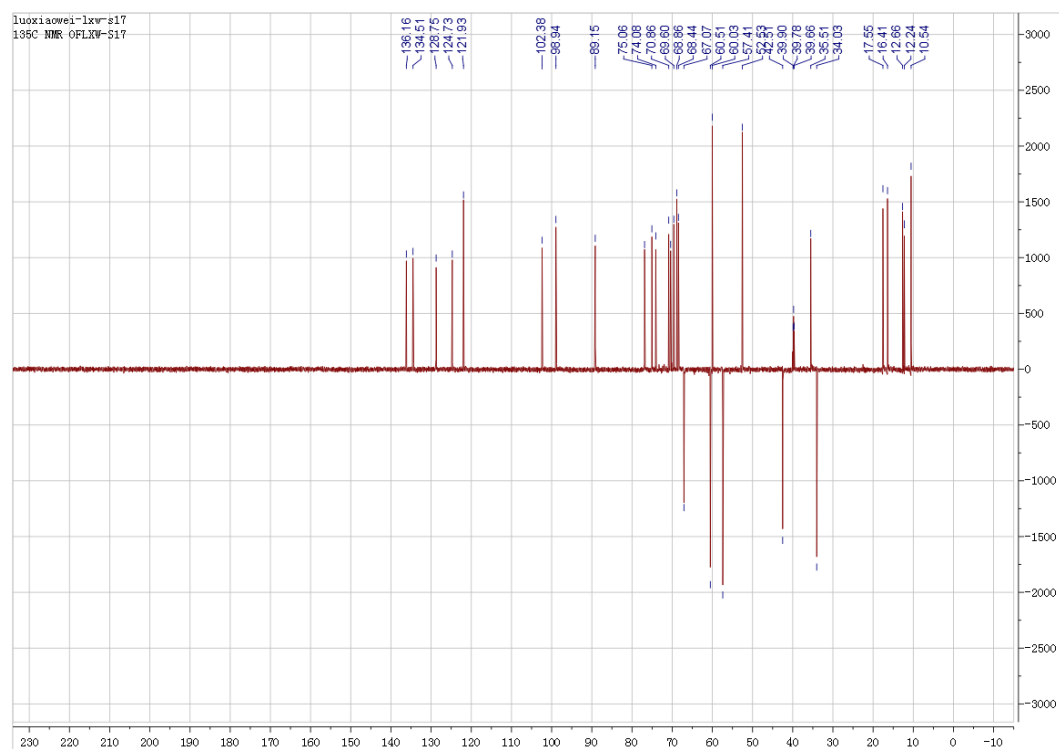

**Figure SS-10-5.** DEPT spectrum of **15** (in DMSO- $d_6$ , 175 MHz).

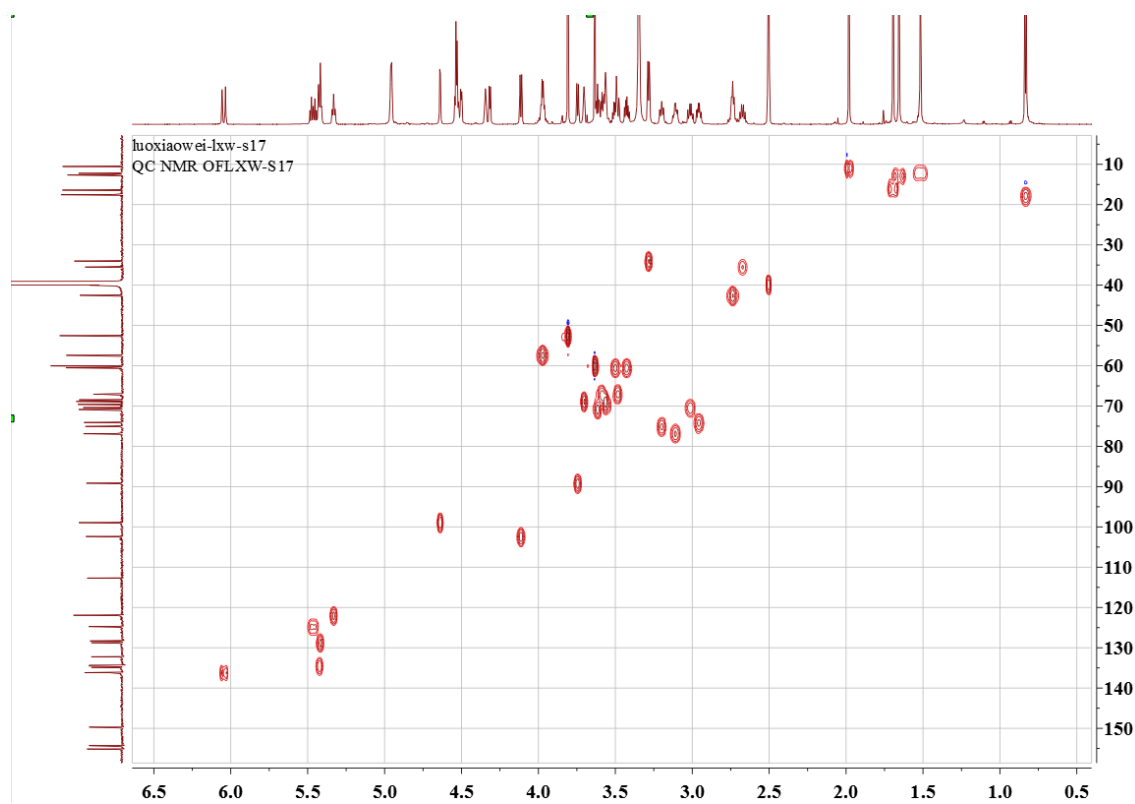

**Figure SS-10-6.** HSQC spectrum of **15** (in DMSO- $d_6$ ).

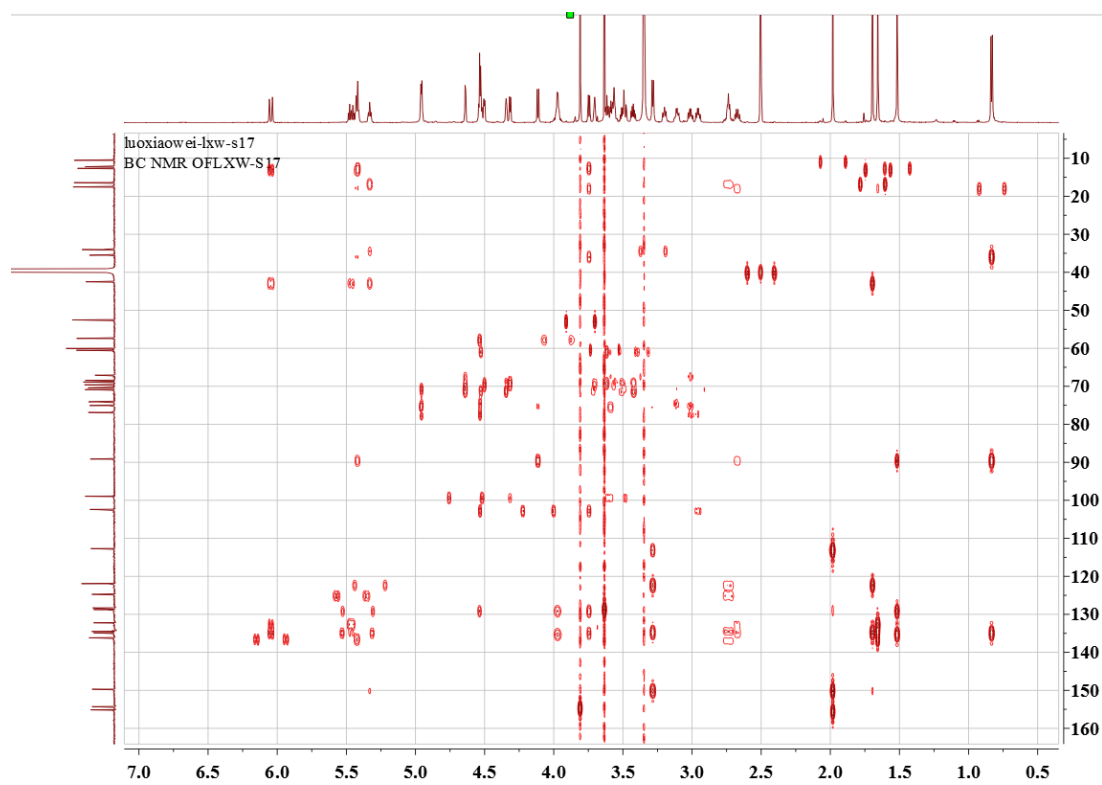

Figure SS-10-7. HMBC spectrum of **15** (in DMSO- $d_6$ ).

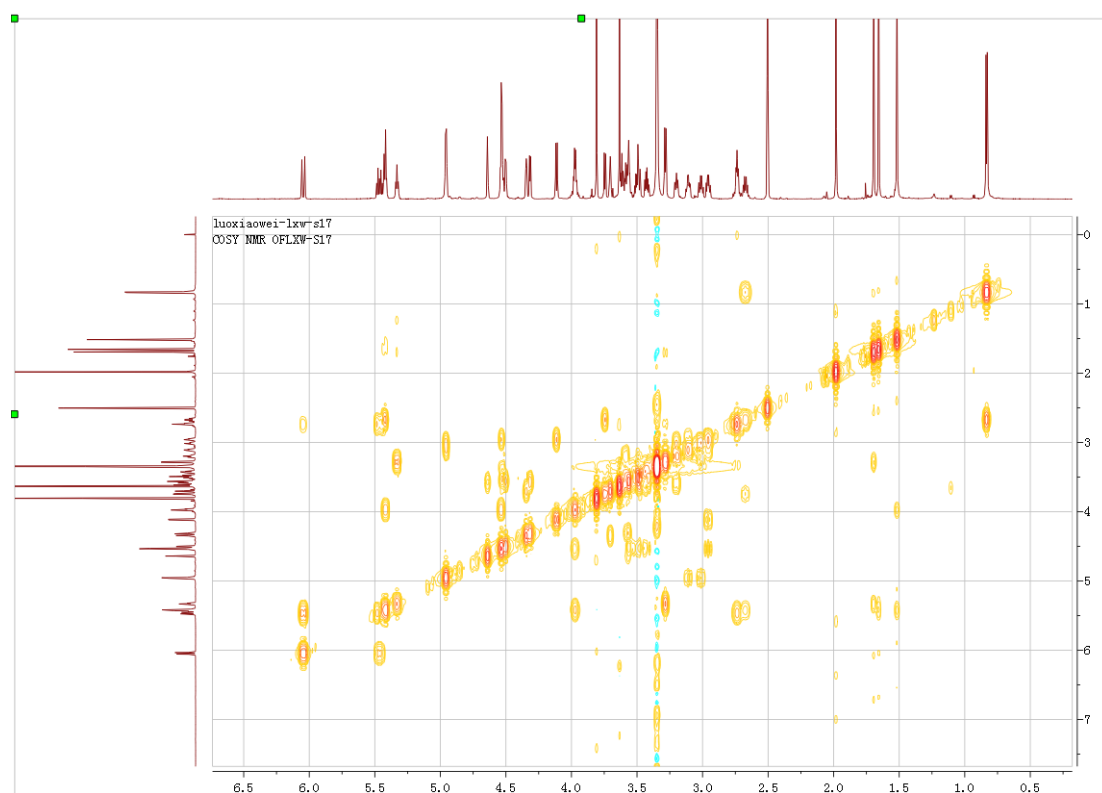

Figure SS-10-8.  $^1\text{H}$ - $^1\text{H}$  COSY spectrum of **15** (in DMSO- $d_6$ ).

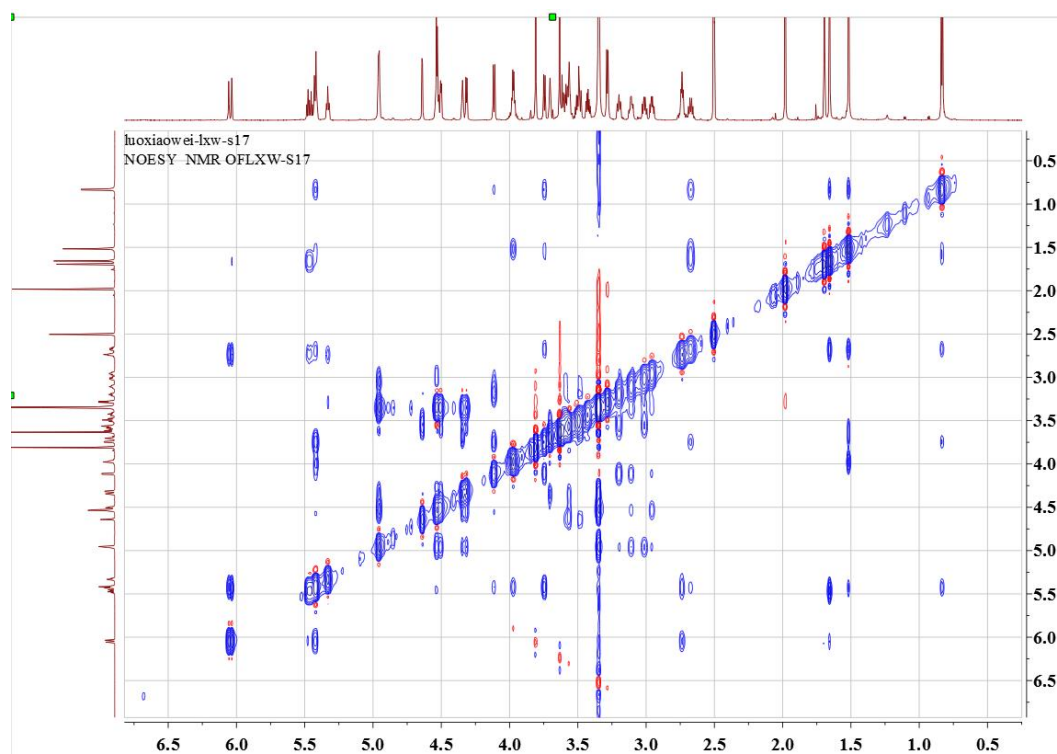

Figure SS-10-9. NOESY spectrum of **15** (in DMSO- $d_6$ ).

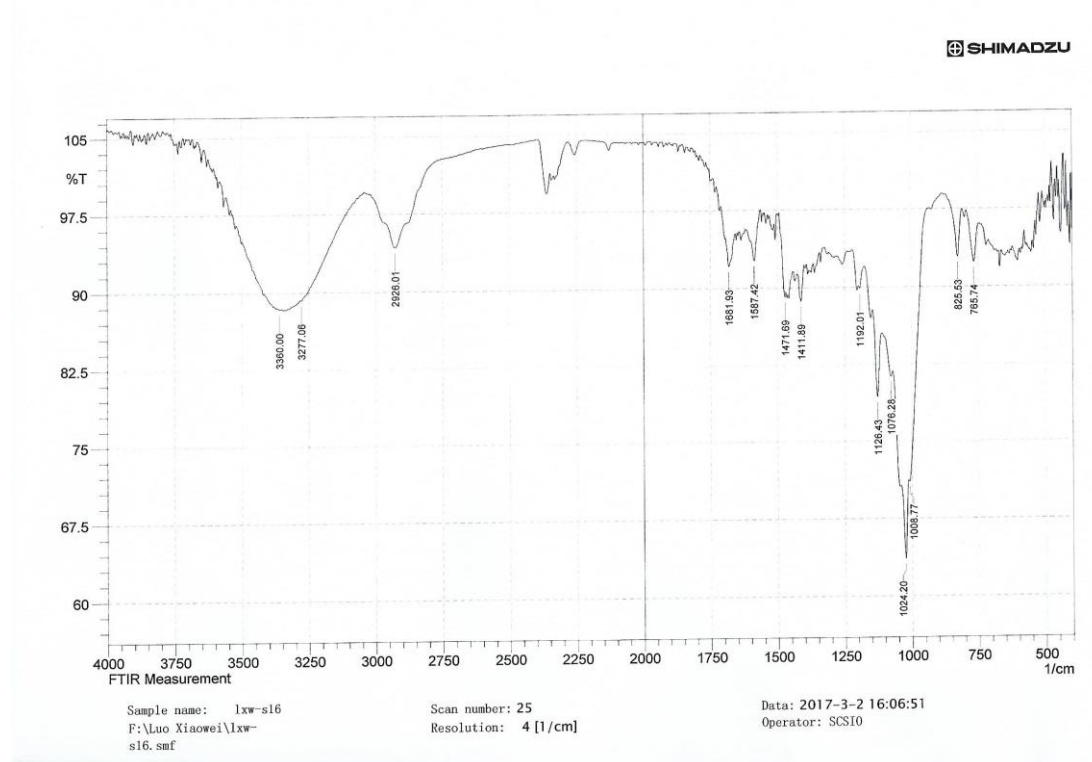

Figure SS-11-1. IR spectrum of **16**.

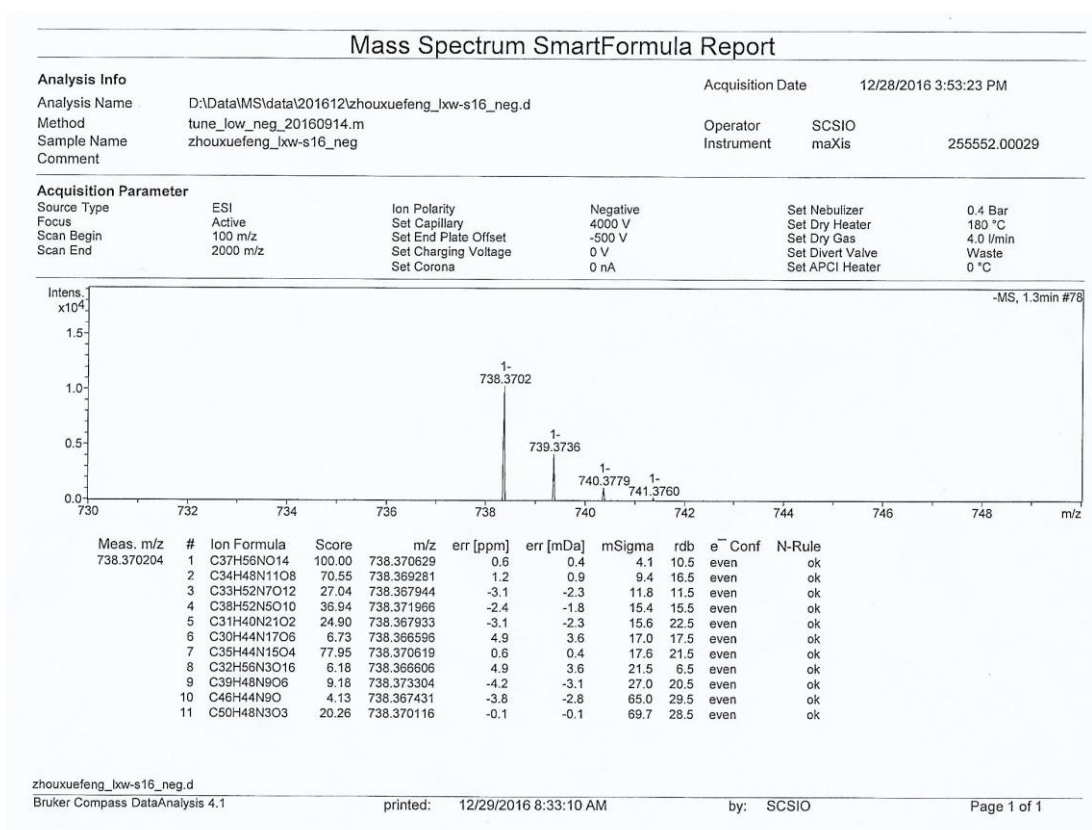

**Figure SS-11-2.** HRESIMS (-) spectrum of **16**.

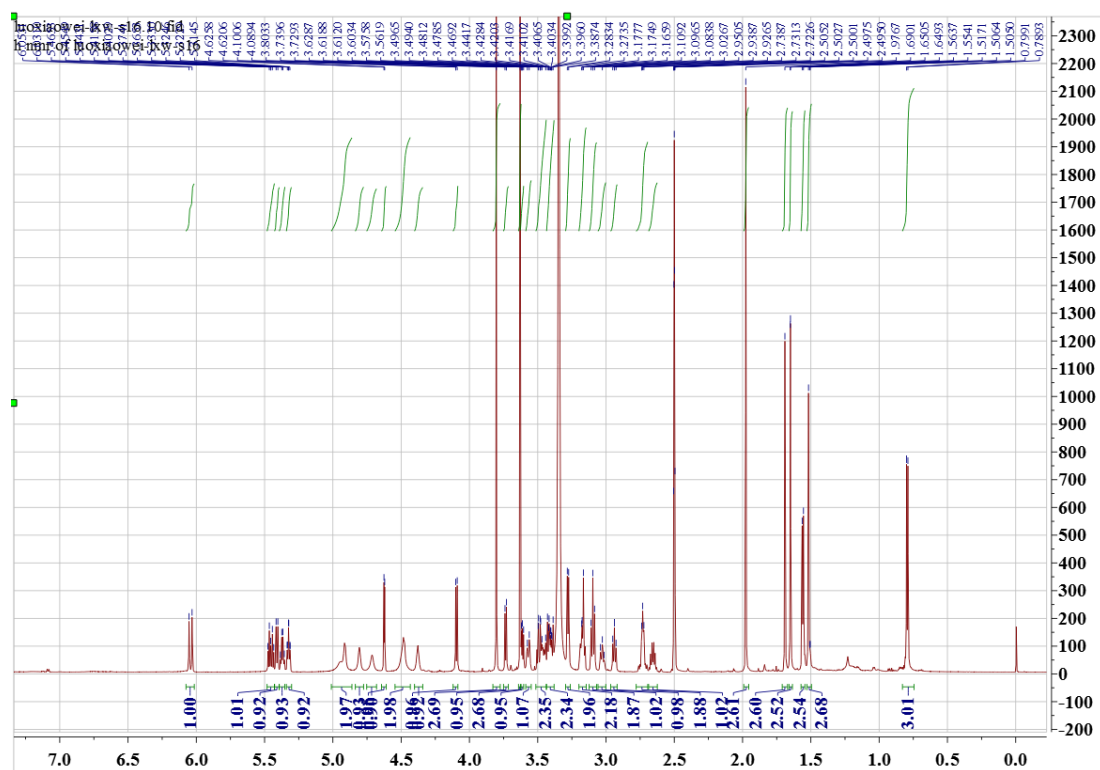

**Figure SS-11-3.** <sup>1</sup>H NMR spectrum of **16** (in DMSO-*d*<sub>6</sub>, 700 MHz).

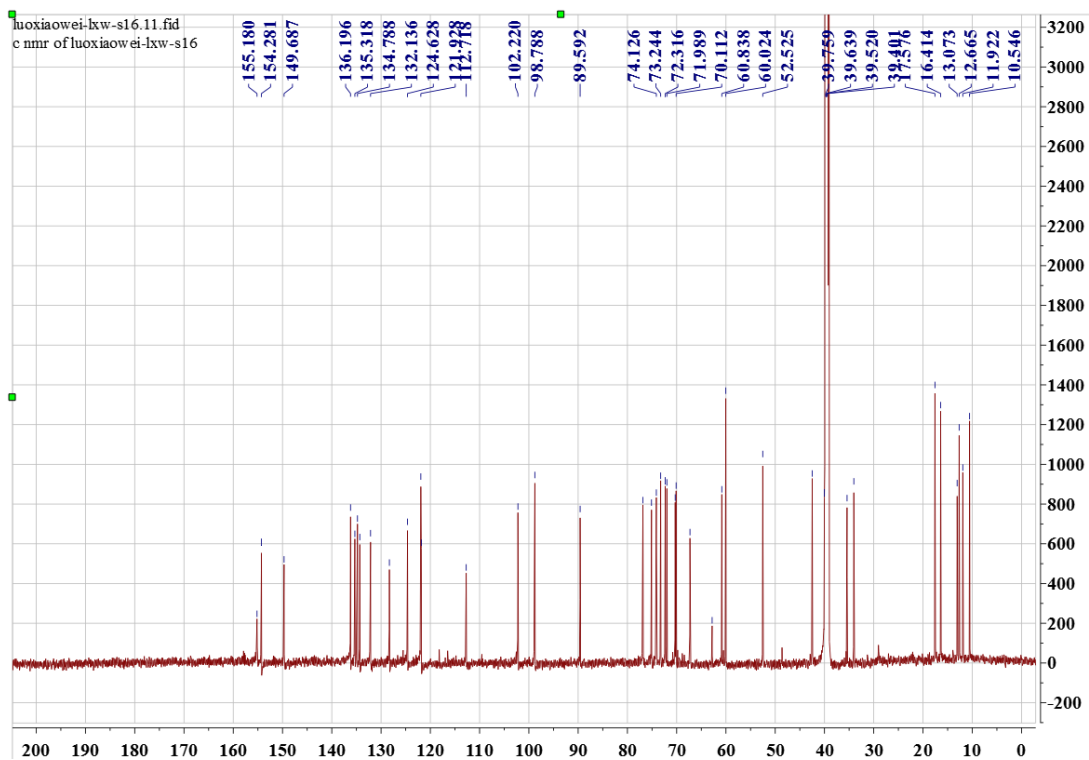

Figure SS-11-4.  $^{13}\text{C}$  NMR spectrum of **16** (in  $\text{DMSO}-d_6$ , 175 MHz).

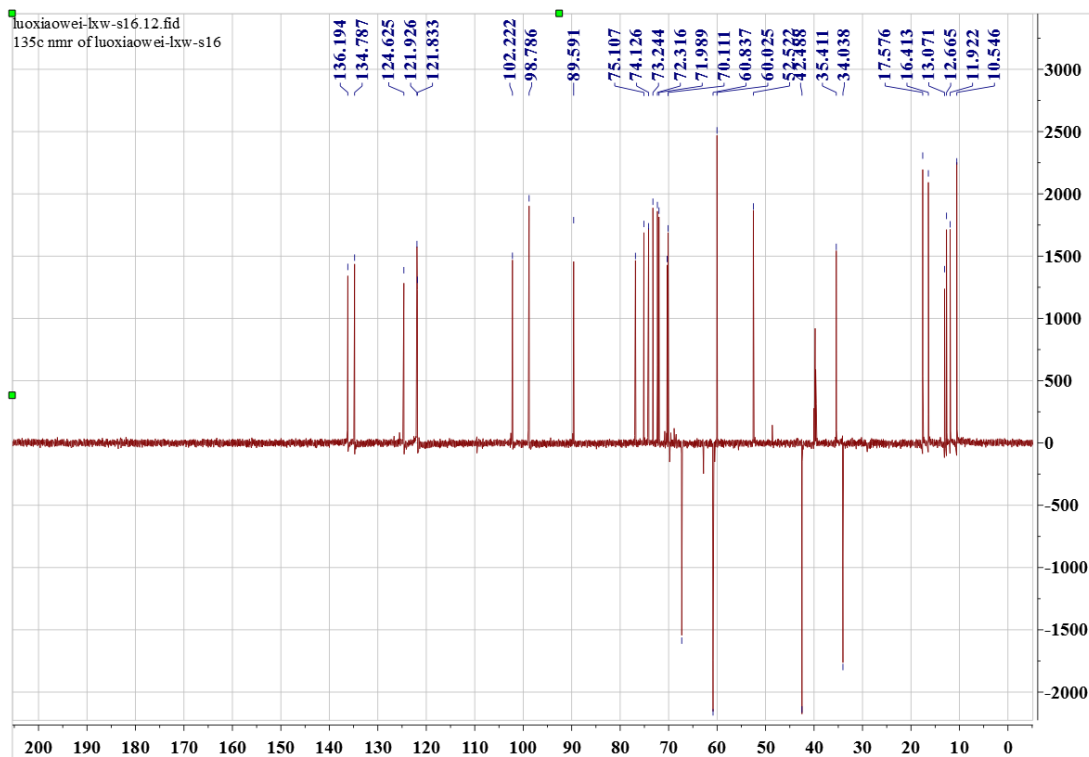

Figure SS-11-5. DEPT spectrum of **16** (in  $\text{DMSO}-d_6$ , 175 MHz).



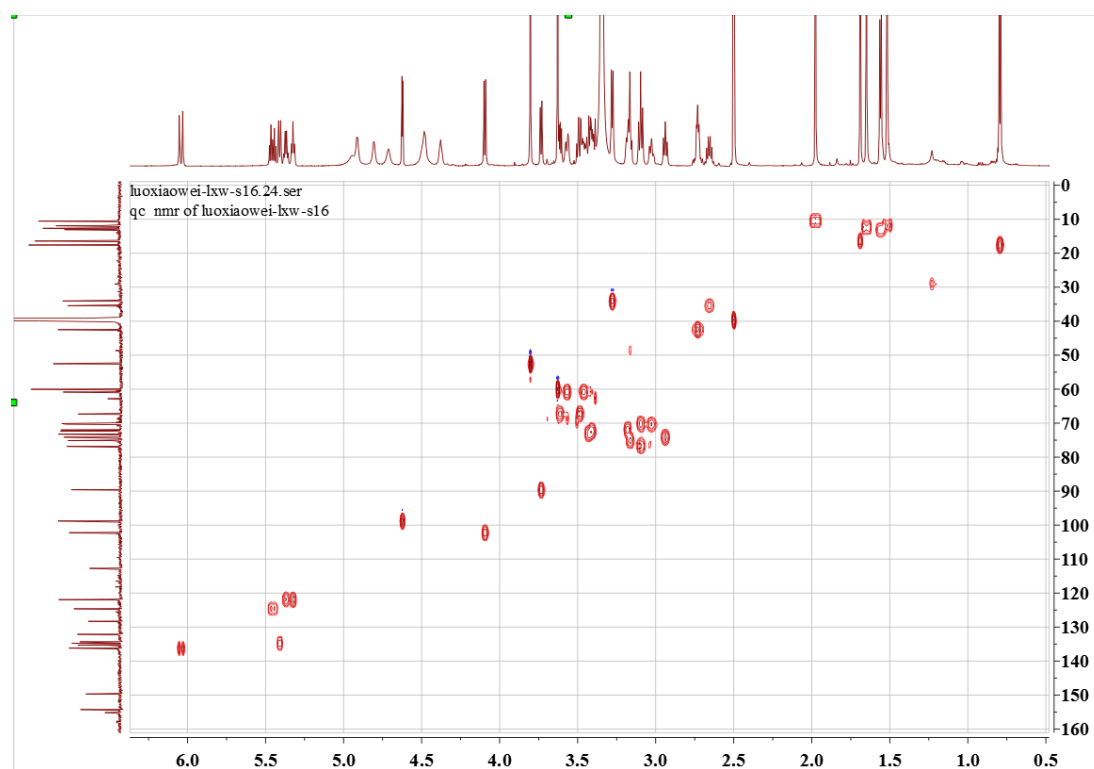

Figure SS-11-6. HSQC spectrum of 16 (in DMSO- $d_6$ ).

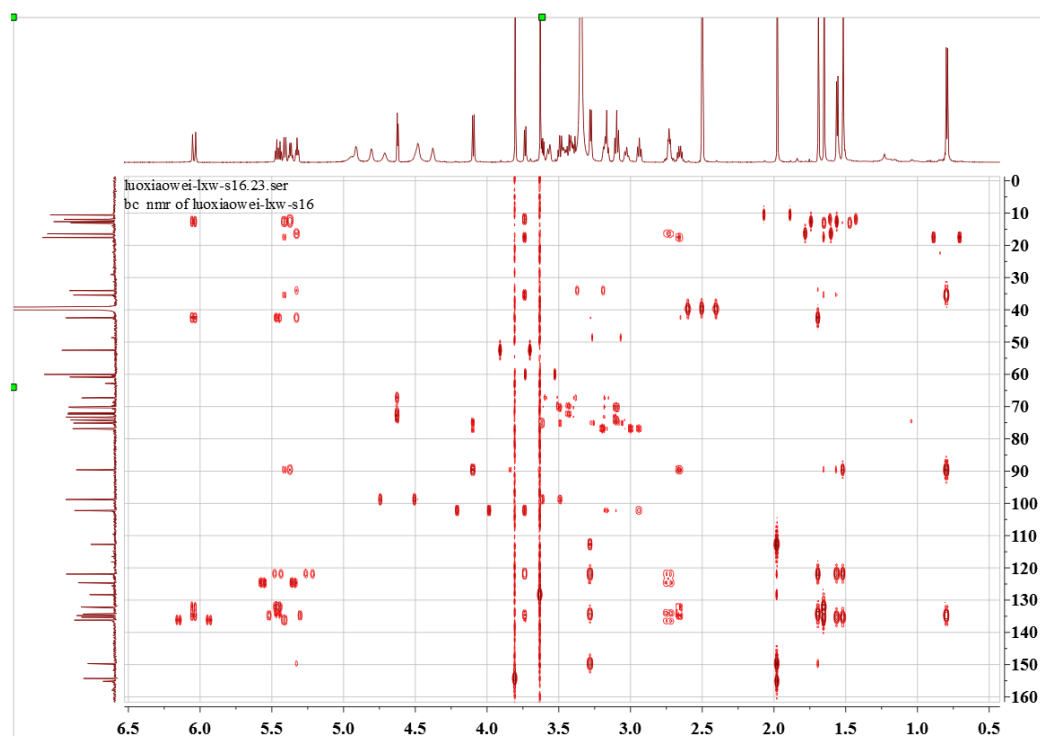

Figure SS-11-7. HMBC spectrum of 16 (in DMSO- $d_6$ ).

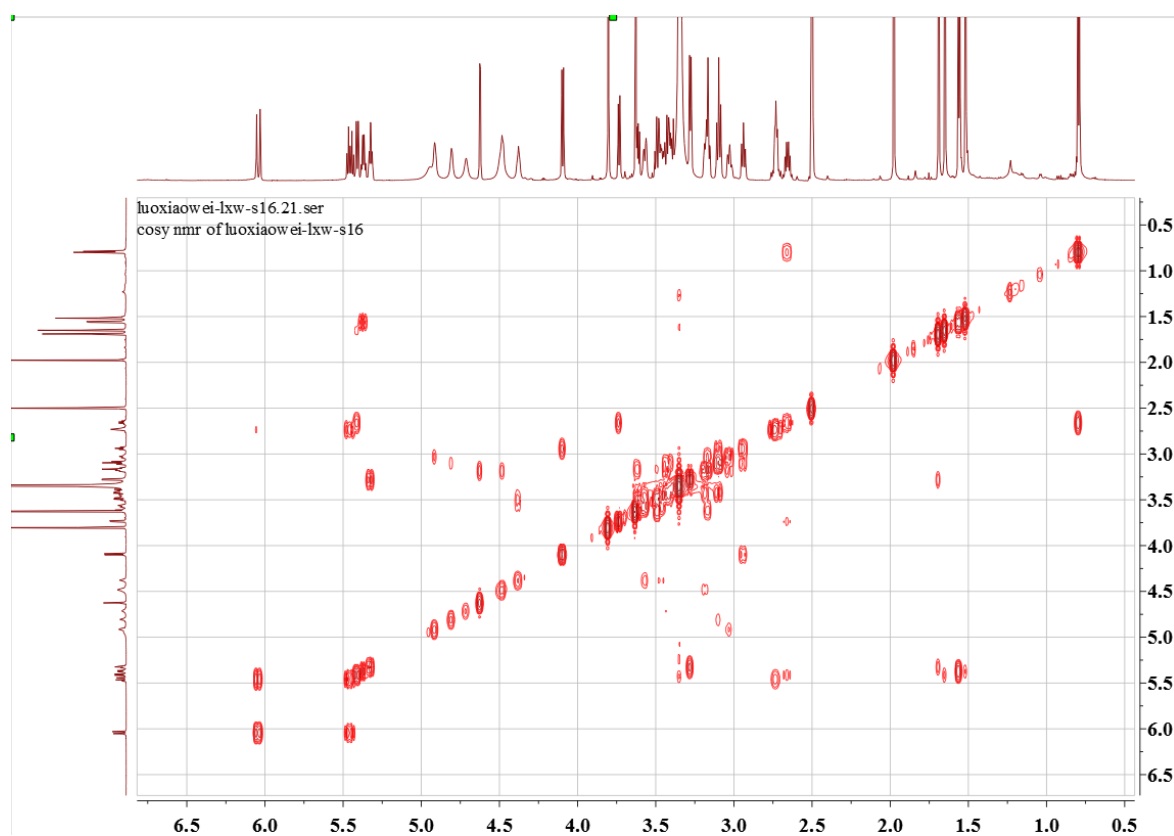

Figure SS-11-8.  $^1\text{H}$ - $^1\text{H}$  COSY spectrum of **16** (in  $\text{DMSO}-d_6$ ).

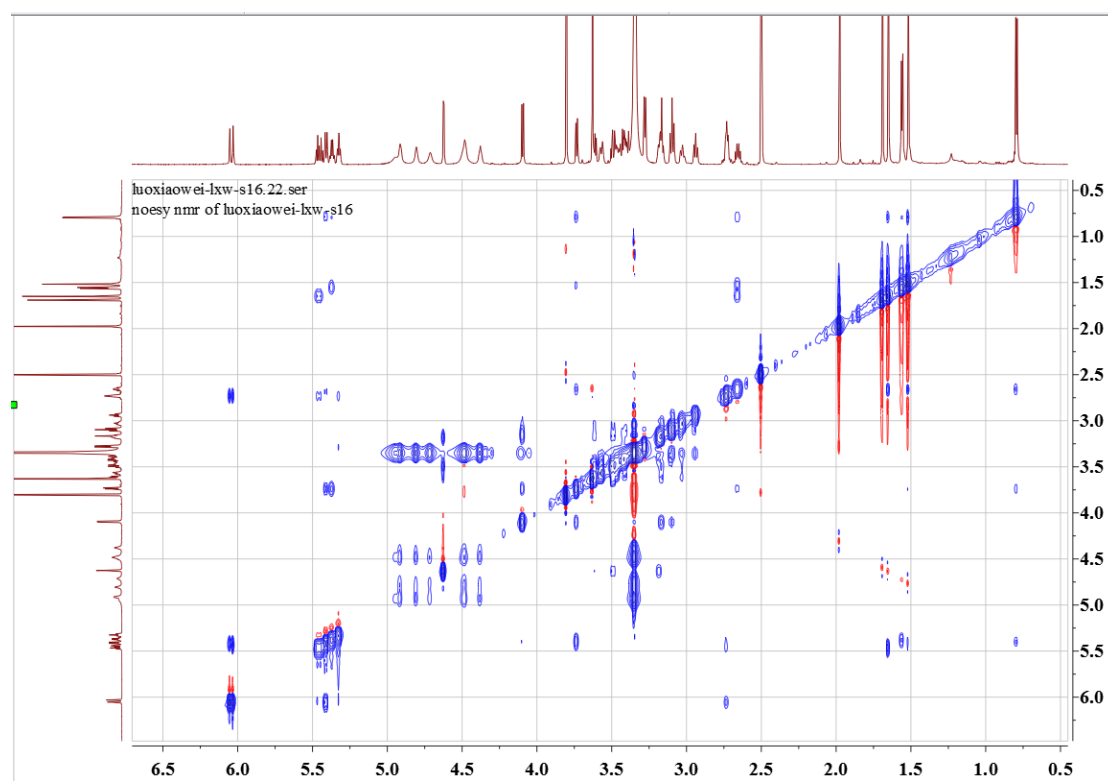

Figure SS-11-9. NOESY spectrum of **16** (in  $\text{DMSO}-d_6$ ).

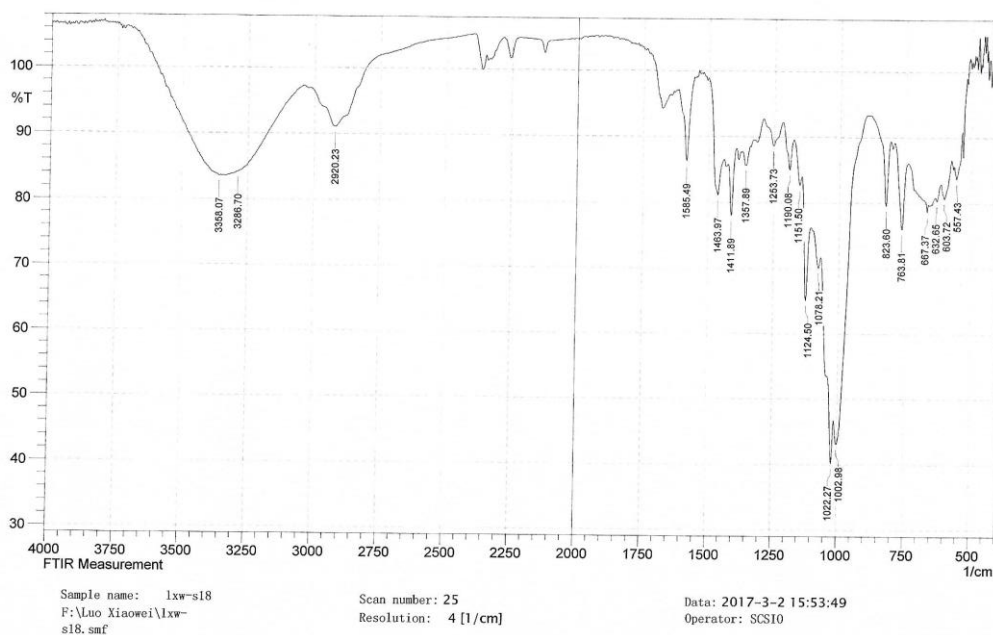

Figure SS-12-1. IR spectrum of 17.

## Mass Spectrum SmartFormula Report

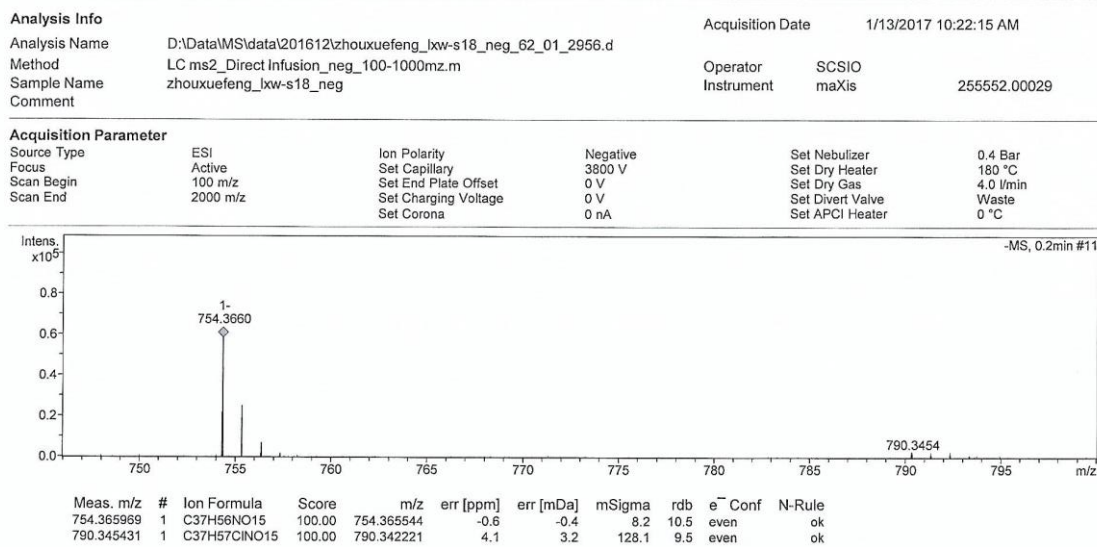

Figure SS-12-2. HRESIMS (-) spectrum of 17.

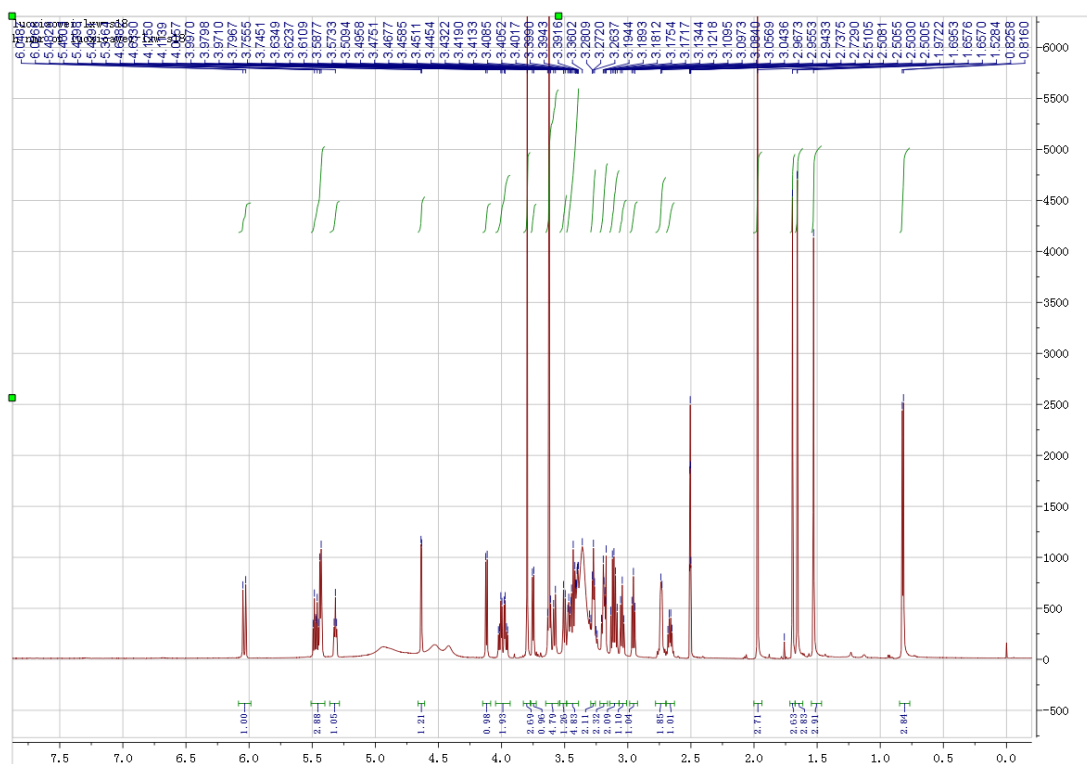

Figure SS-12-3. <sup>1</sup>H NMR spectrum of 17 (in DMSO-*d*<sub>6</sub>, 700 MHz).

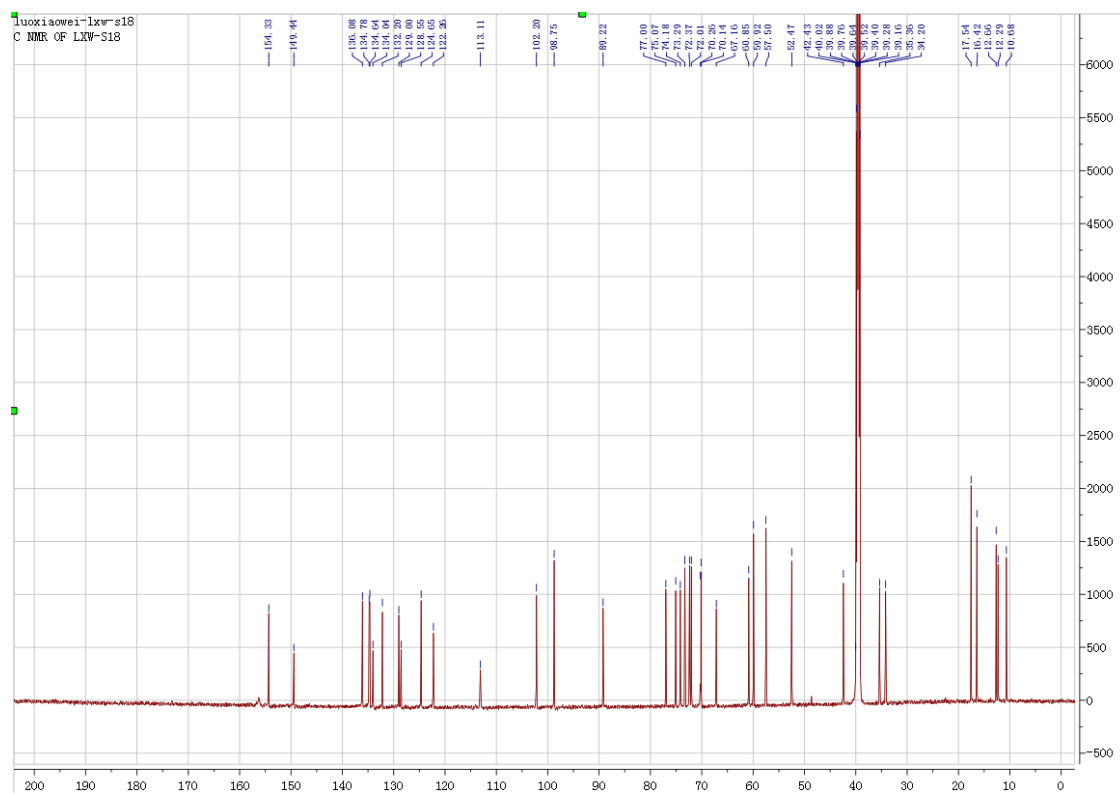

Figure SS-12-4. <sup>13</sup>C NMR spectrum of 17 (in DMSO-*d*<sub>6</sub>, 175 MHz).

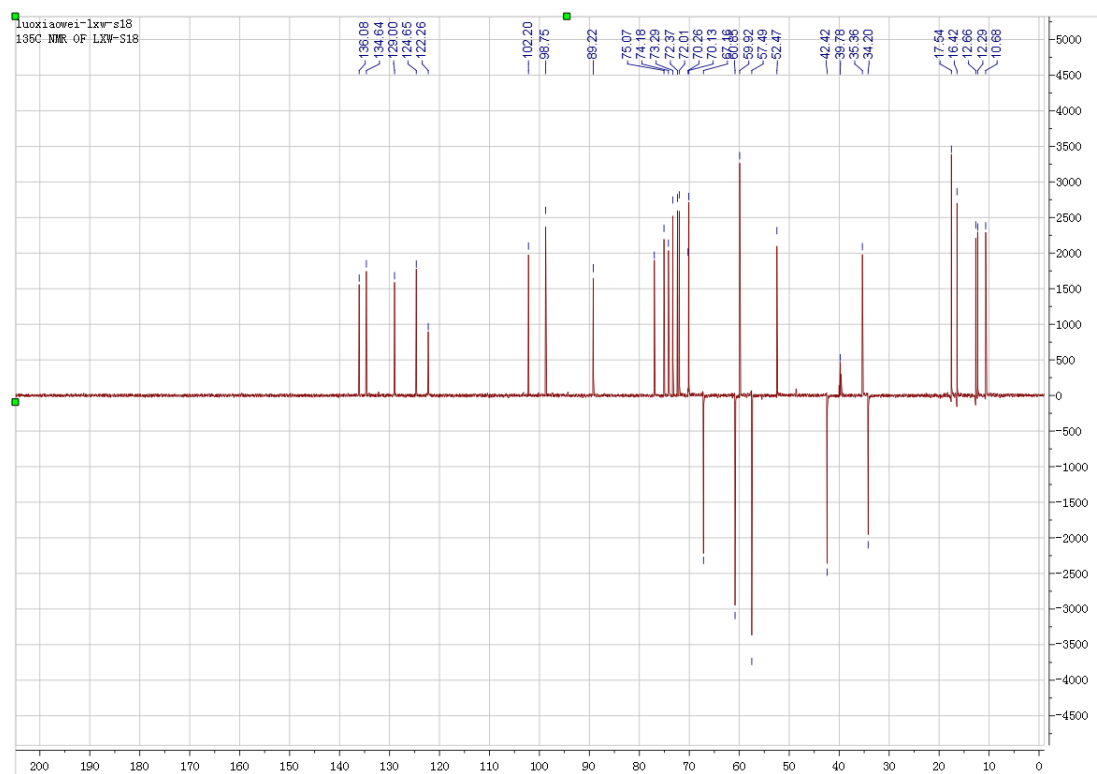

Figure SS-12-5. DEPT spectrum of **17** (in DMSO- $d_6$ , 175 MHz).

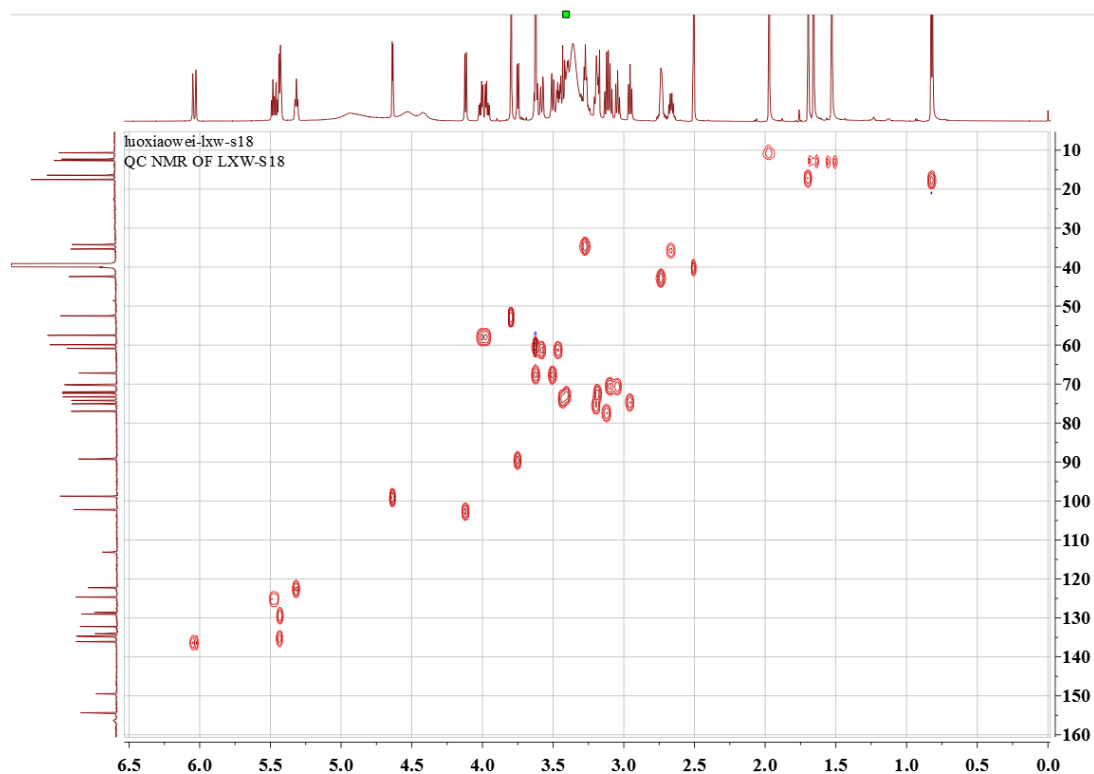

Figure SS-12-6. HSQC spectrum of **17** (in DMSO- $d_6$ ).

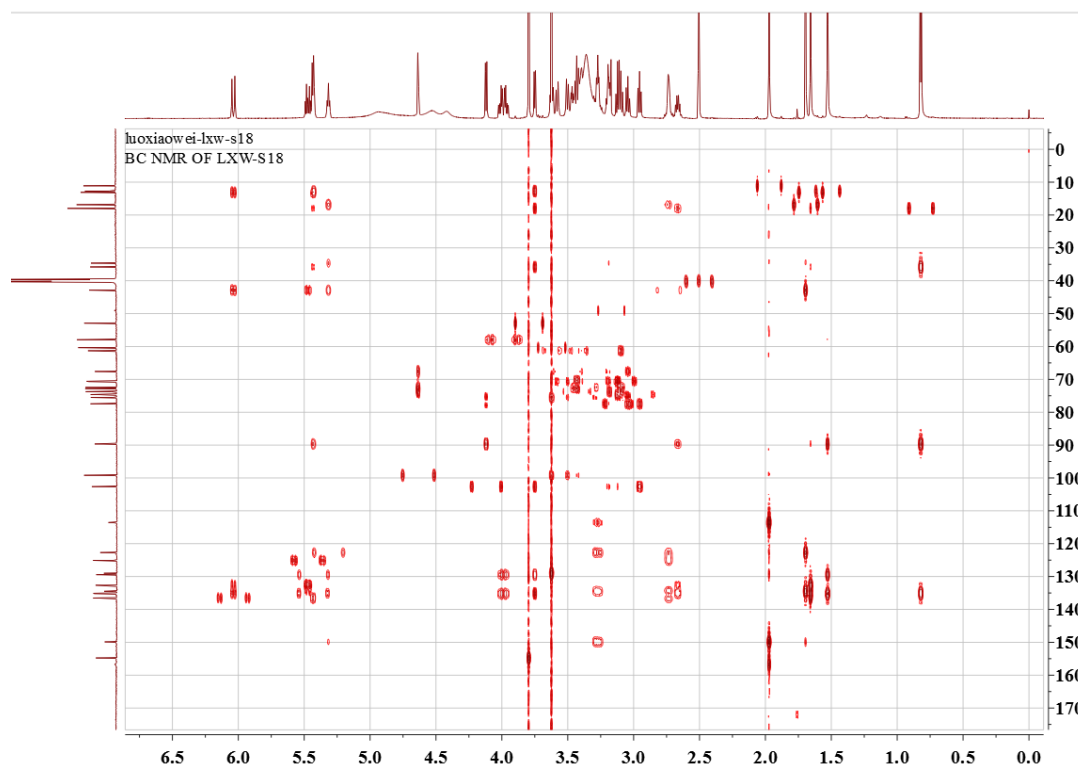

**Figure SS-12-7.** HMBC spectrum of **17** (in DMSO- $d_6$ ).

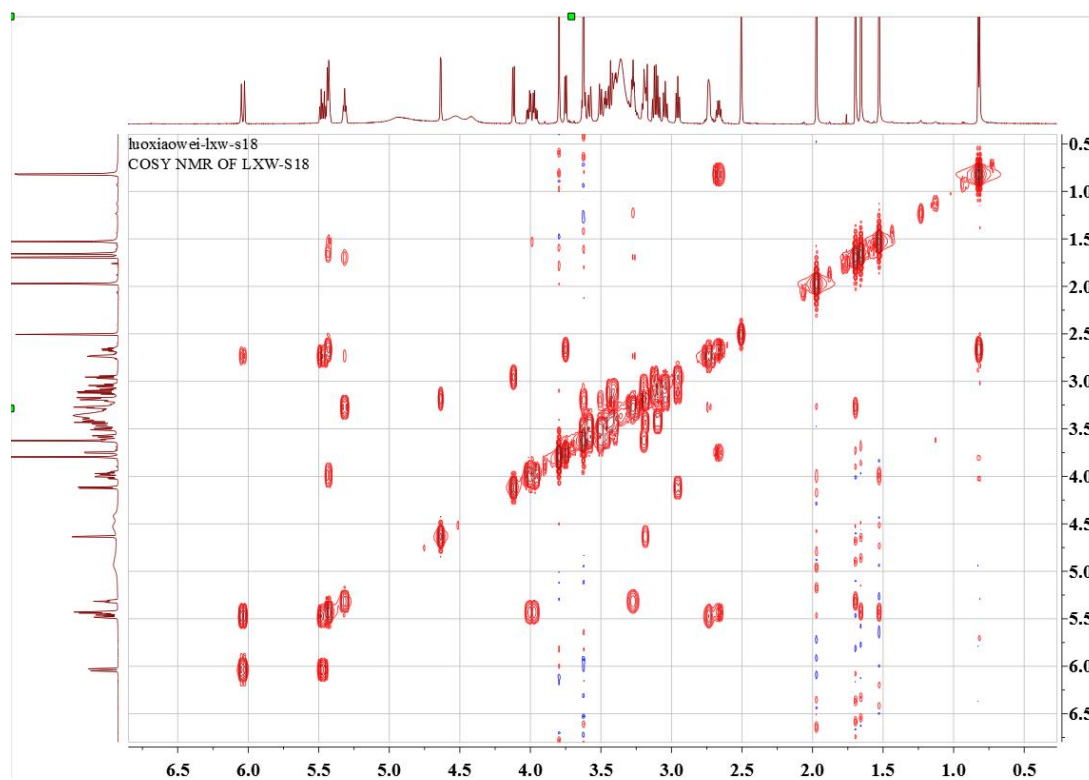

**Figure SS-12-8.**  $^1\text{H}$ - $^1\text{H}$  COSY spectrum of **17** (in DMSO- $d_6$ ).

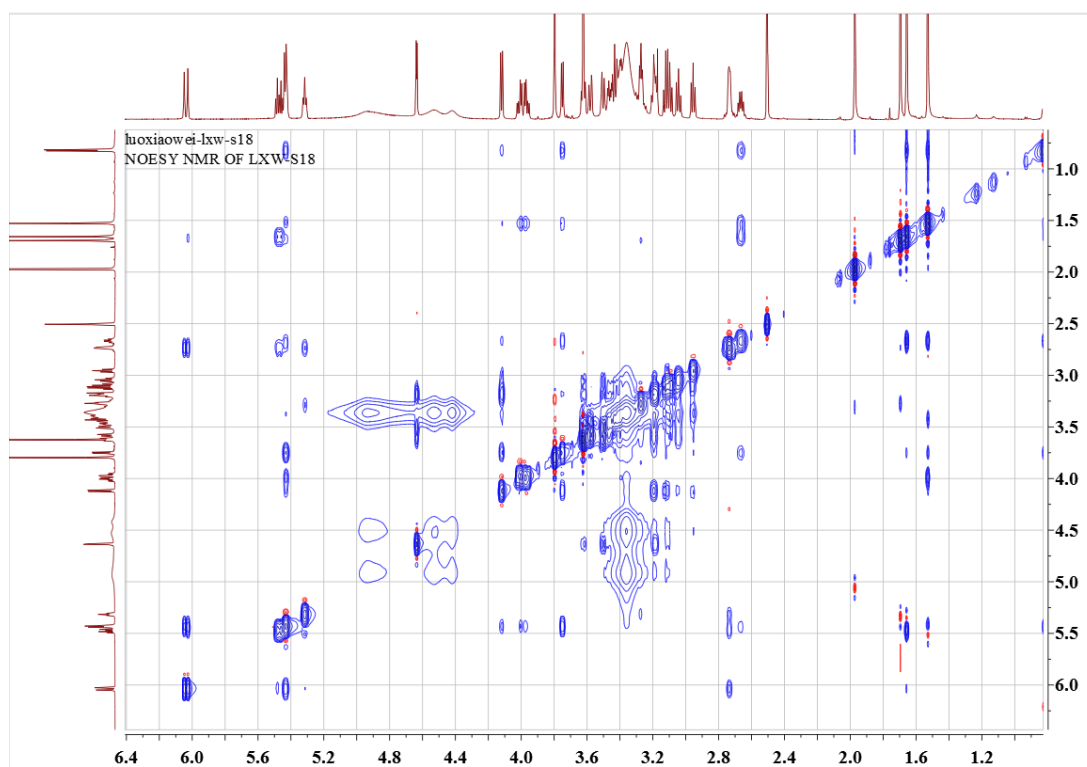

Figure SS-12-9. NOESY spectrum of **17** (in DMSO- $d_6$ ).

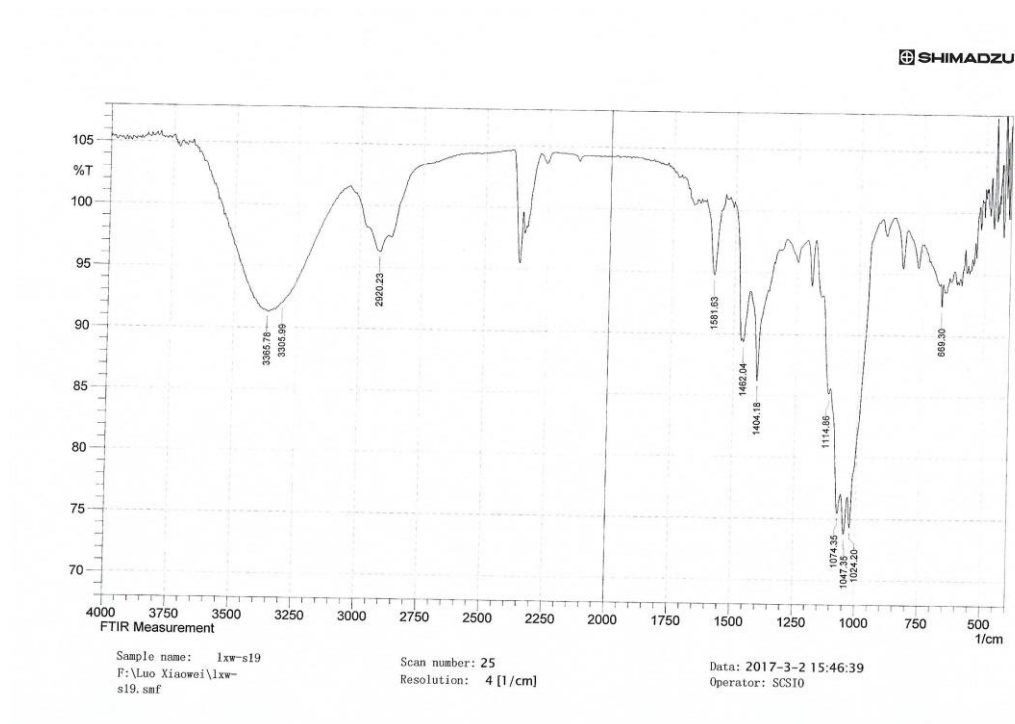

Figure SS-13-1. IR spectrum of **18**.

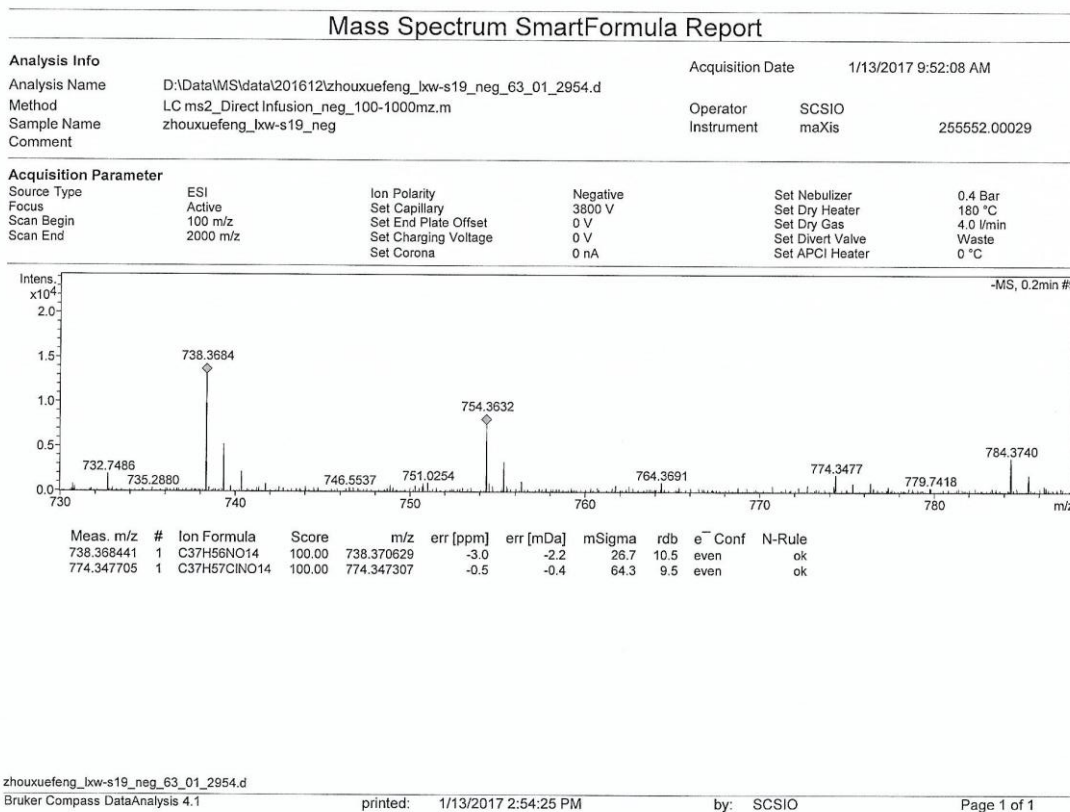

**Figure SS-13-2.** HRESIMS (+) spectrum of **18**.

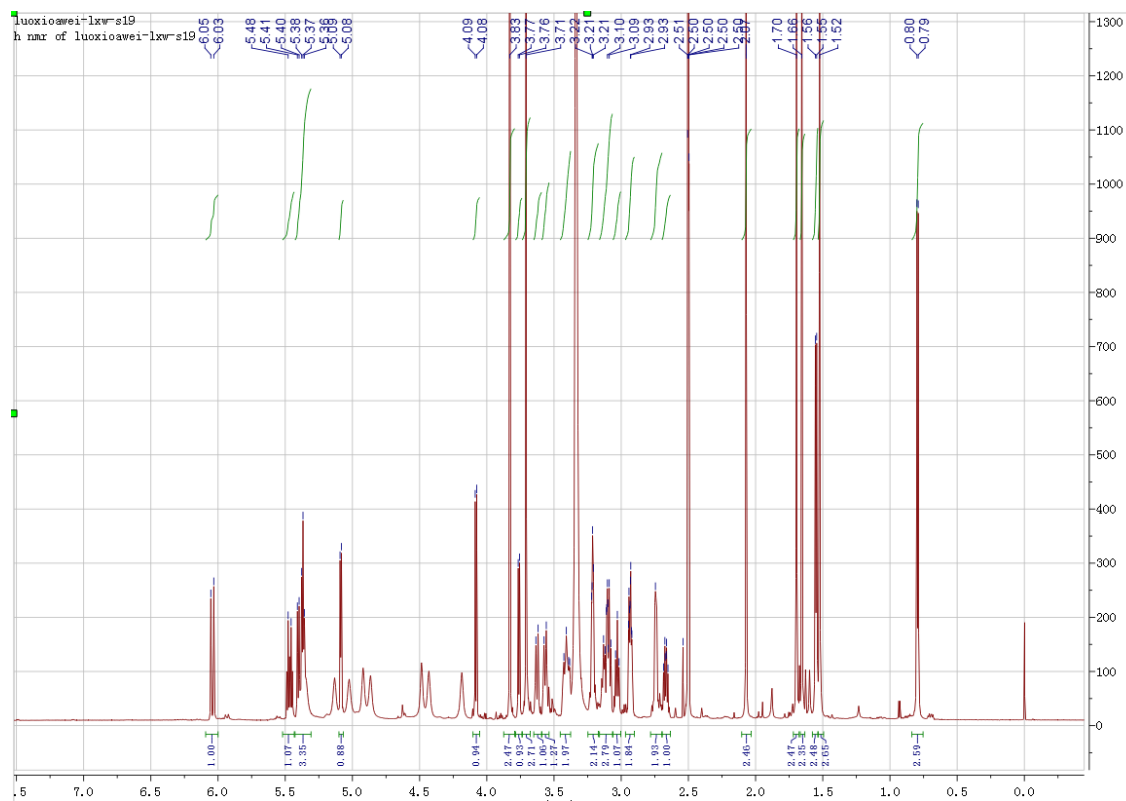

**Figure SS-13-3.** <sup>1</sup>H NMR spectrum of **18** (in DMSO-*d*<sub>6</sub>, 700 MHz).



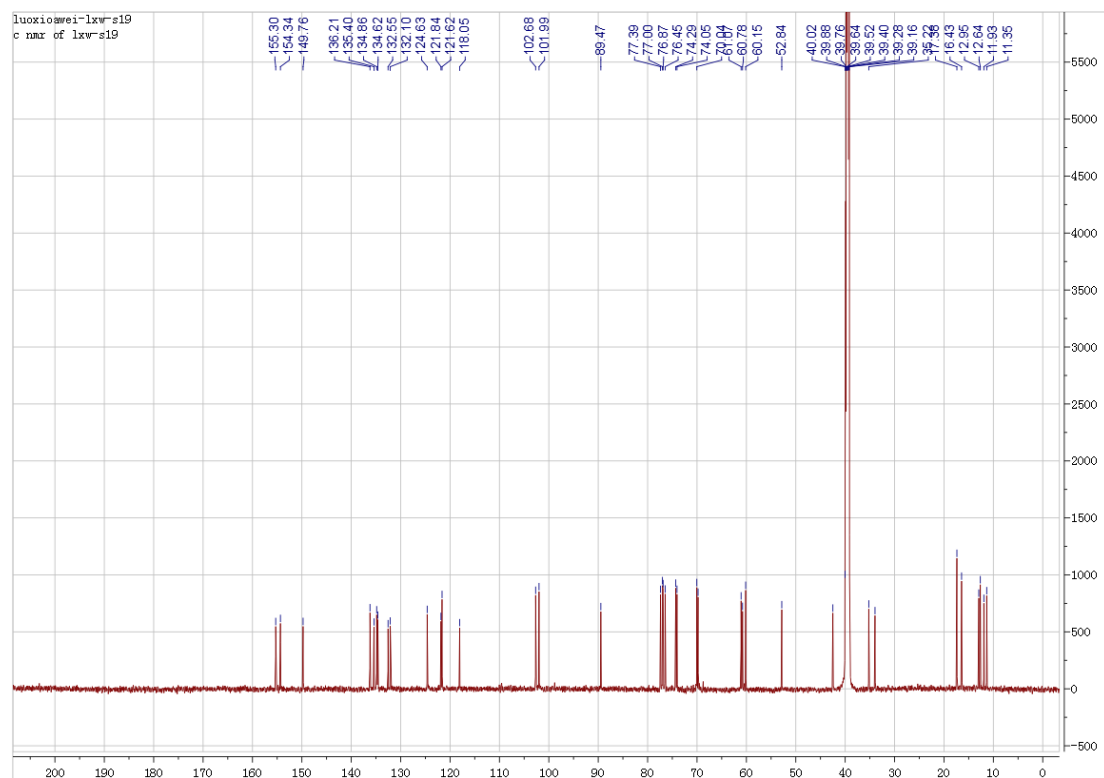

**Figure SS-13-4.**  $^{13}\text{C}$  NMR spectrum of **18** (in  $\text{DMSO}-d_6$ , 175 MHz).

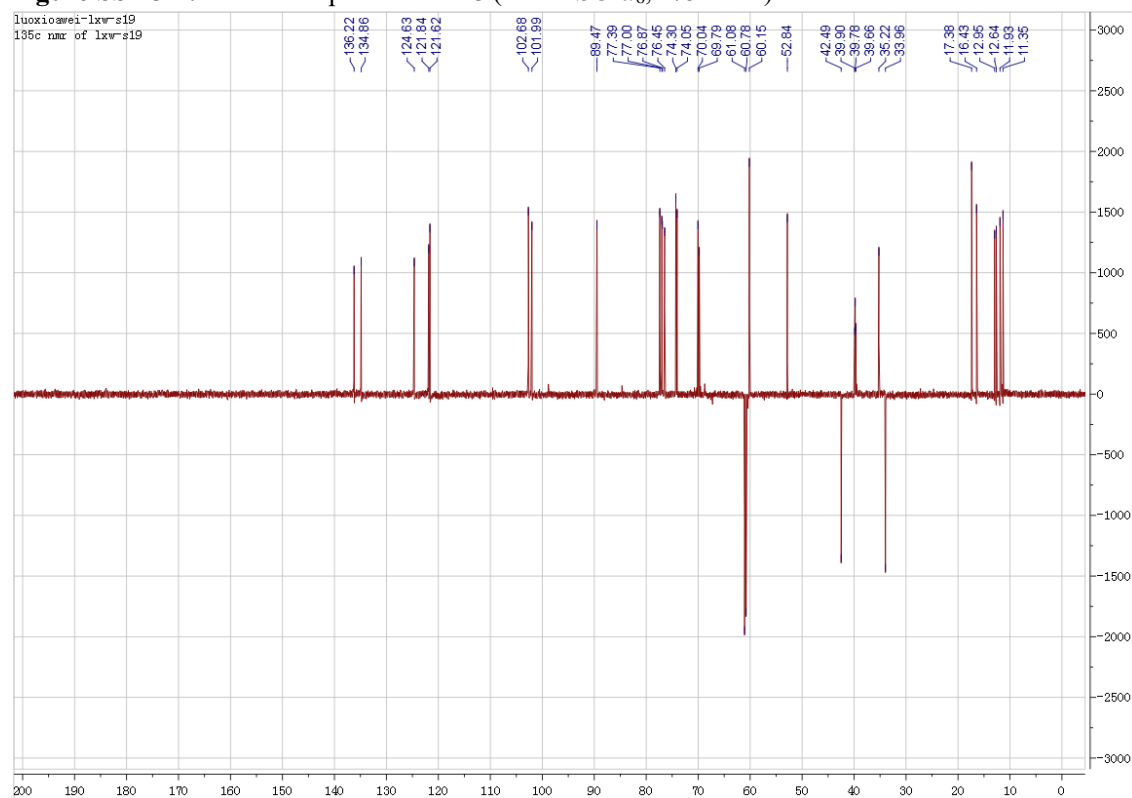

**Figure SS-13-5.** DEPT spectrum of **18** (in  $\text{DMSO}-d_6$ , 175 MHz).

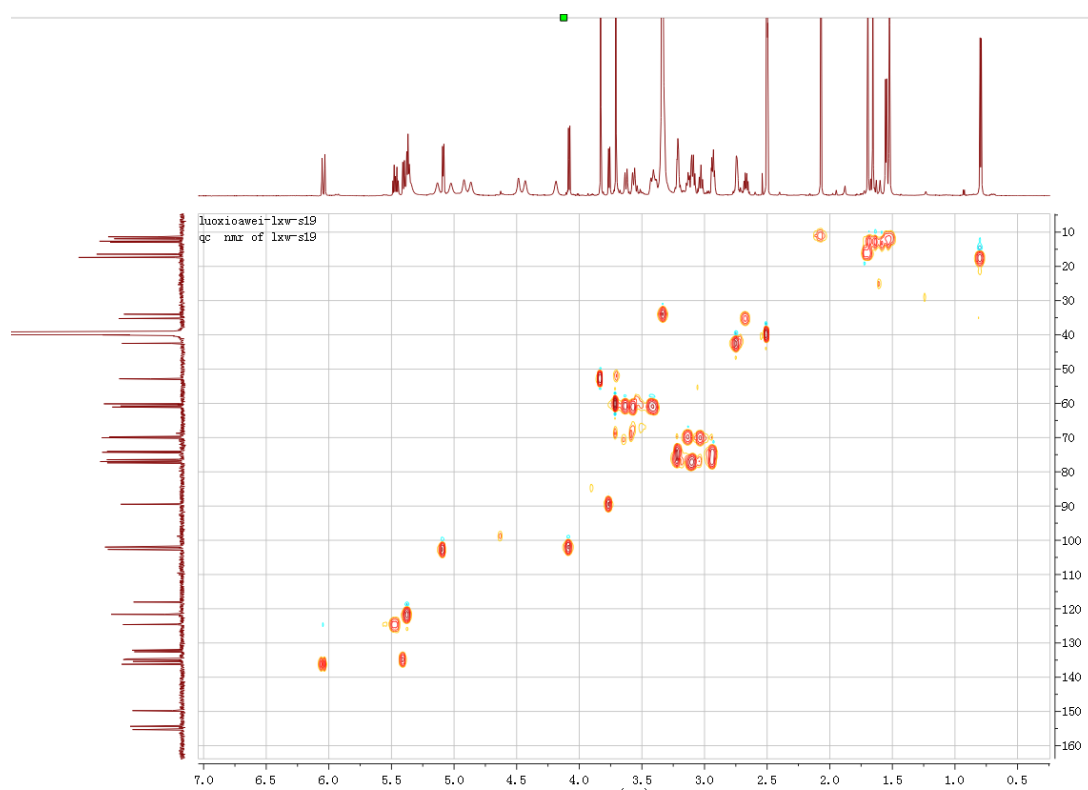

**Figure SS-13-6.** HSQC spectrum of **18** (in DMSO- $d_6$ ).

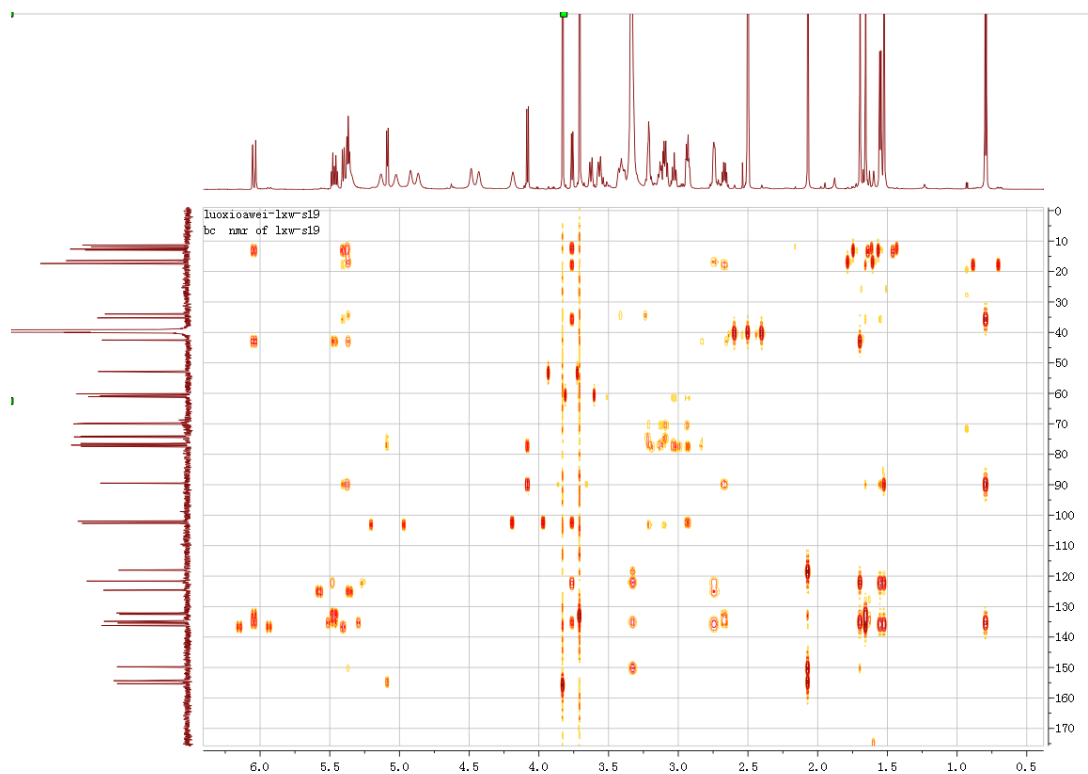

**Figure SS-13-7.** HMBC spectrum of **18** (in DMSO- $d_6$ ).

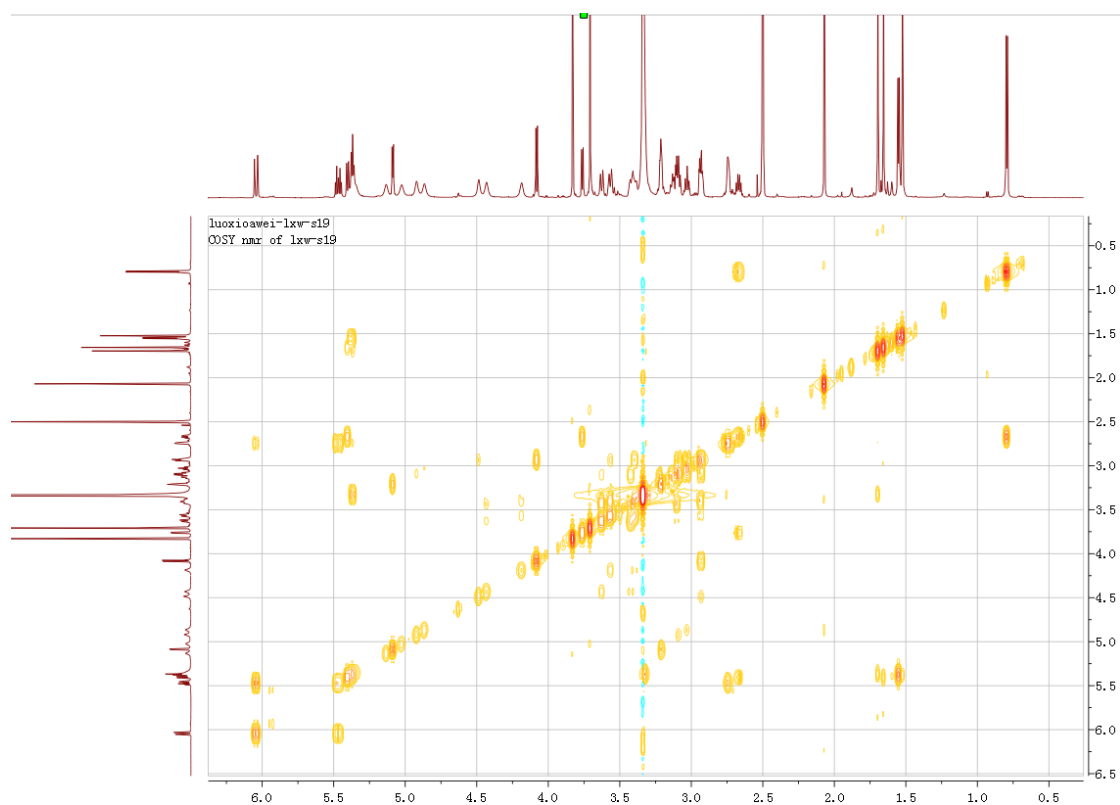

**Figure SS-13-8.**  $^1\text{H}$ - $^1\text{H}$  COSY spectrum of **18** (in  $\text{DMSO}-d_6$ ).

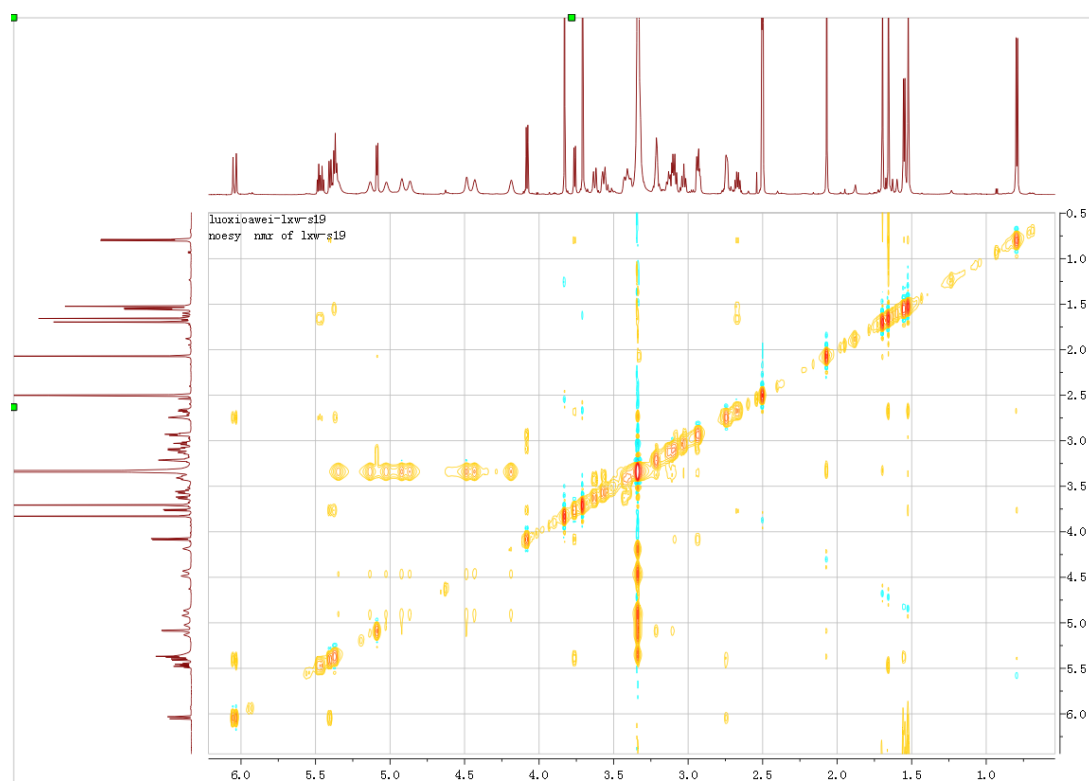

**Figure SS-13-9.** NOESY spectrum of **18** (in  $\text{DMSO}-d_6$ ).

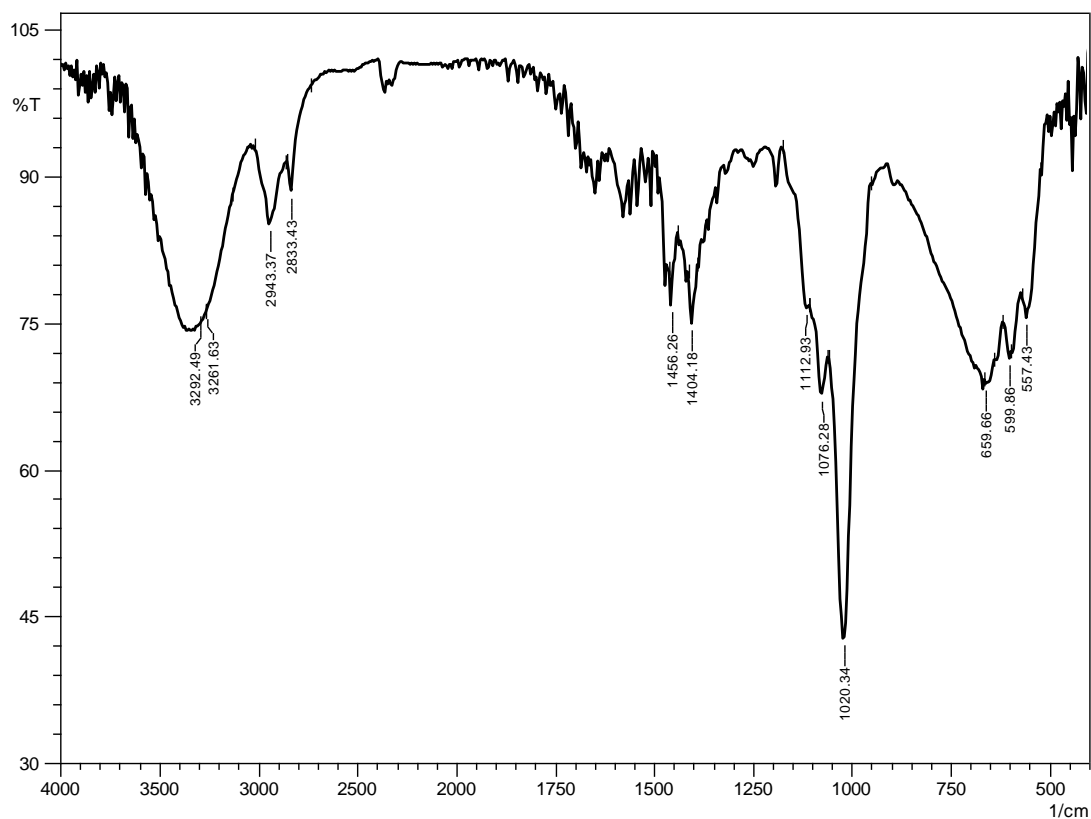

Figure SS-14-1. IR spectrum of 19.

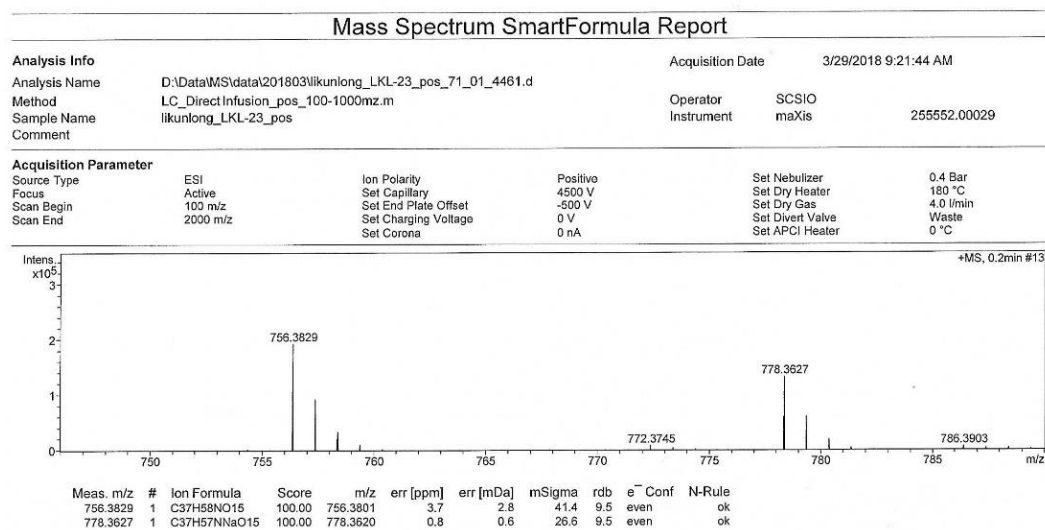

likunlong\_LKL-23\_pos\_71\_01\_4461.d  
Bruker Compass DataAnalysis 4.1

printed: 3/29/2018 9:28:53 AM

by: SCSIO

Page 1 of 1

Figure SS-14-2. HRESIMS (+) spectrum of 19.

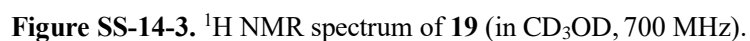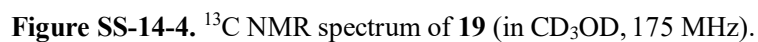

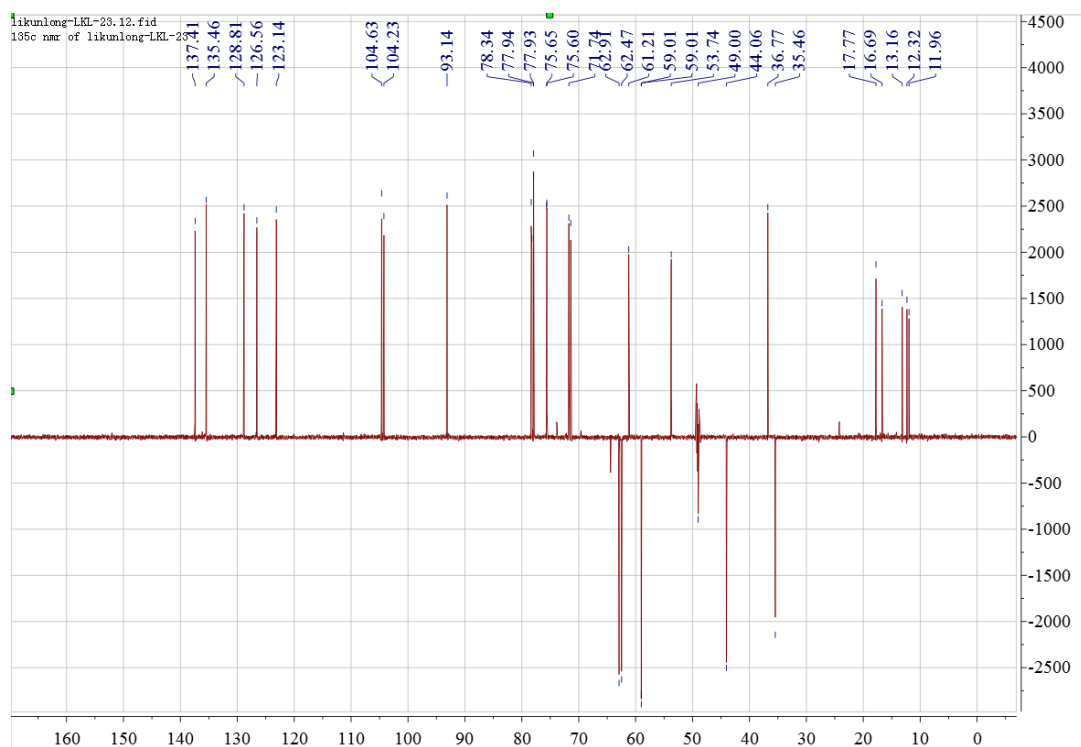

**Figure SS-14-5.** DEPT spectrum of **19** (in CD<sub>3</sub>OD, 175 MHz).

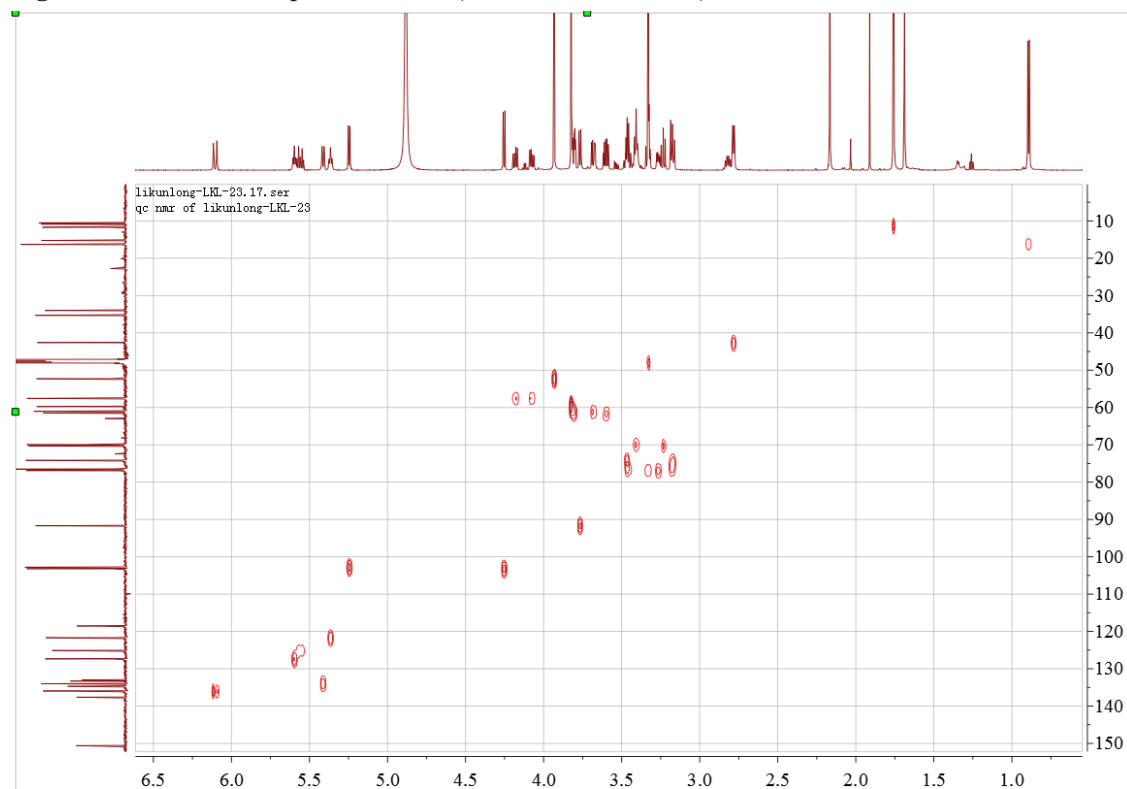

**Figure SS-14-6.** HSQC spectrum of **19** (in CD<sub>3</sub>OD).

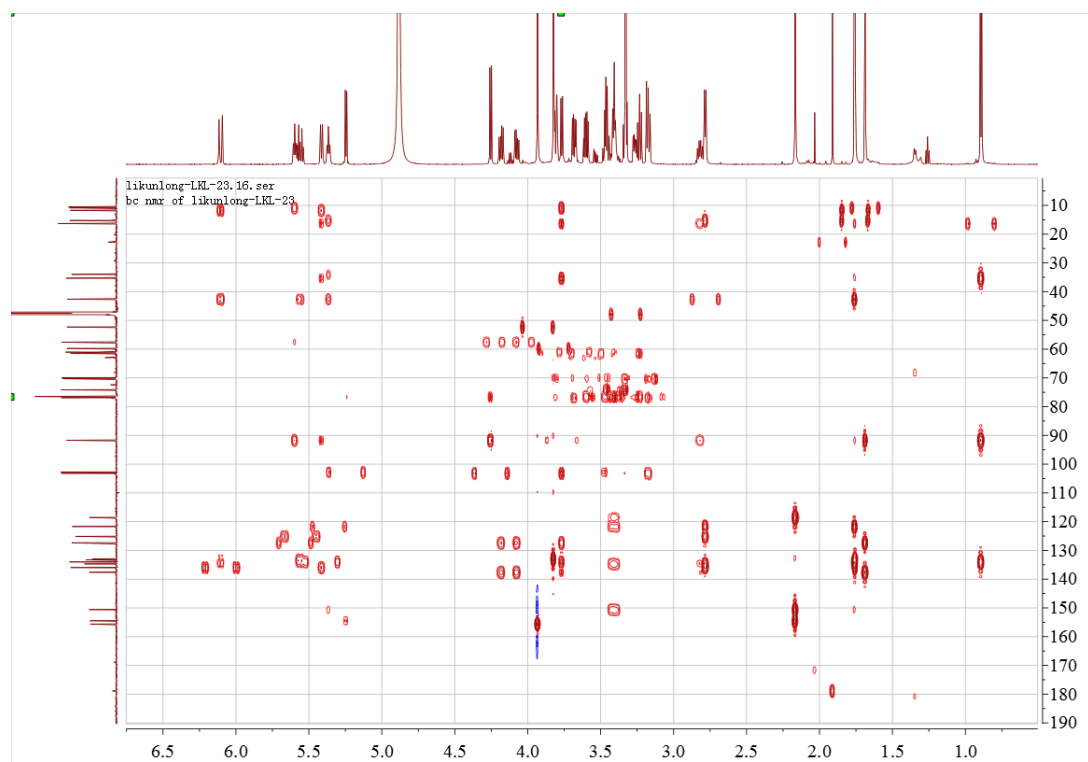

**Figure SS-14-7.** HMBC spectrum of **19** (in CD<sub>3</sub>OD).

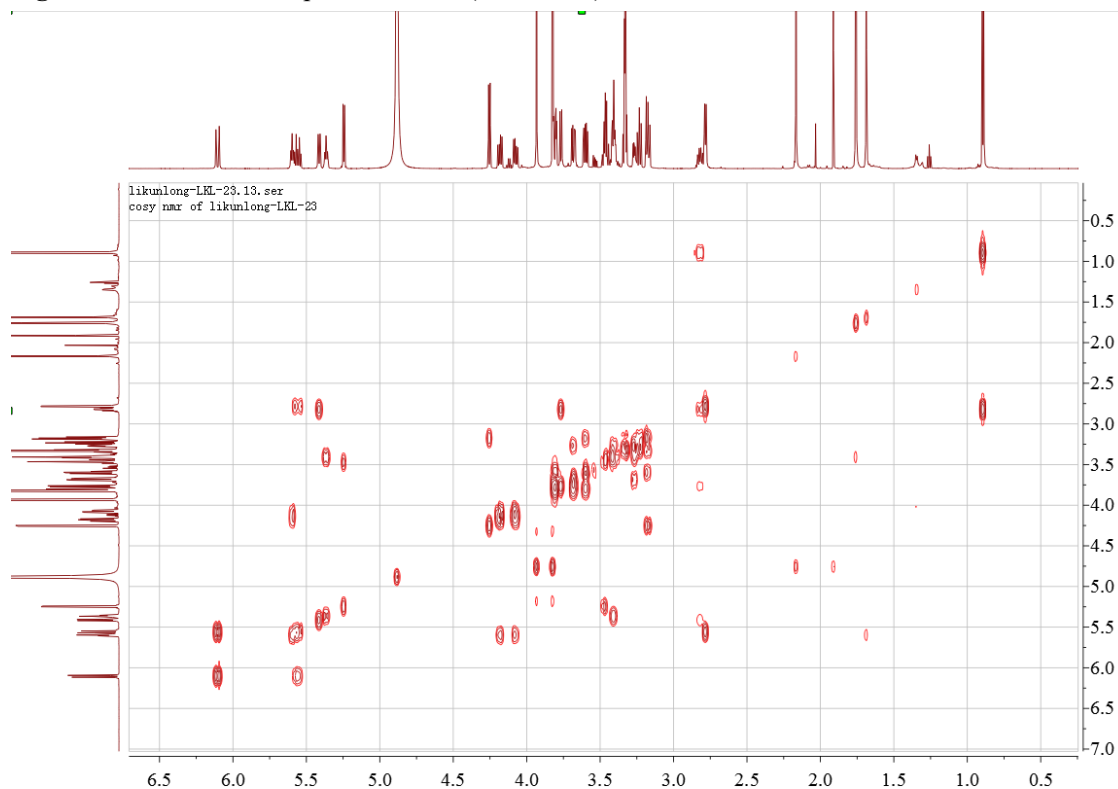

**Figure SS-14-8.** <sup>1</sup>H-<sup>1</sup>H COSY spectrum of **19** (in CD<sub>3</sub>OD).

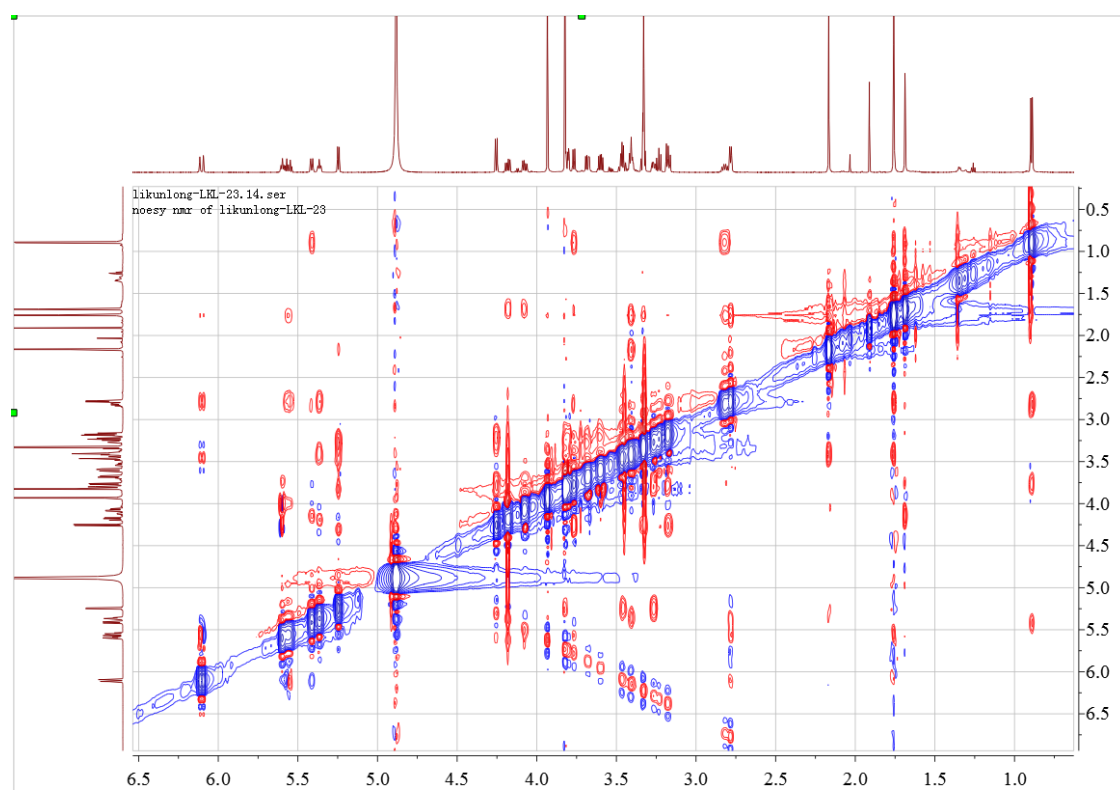

**Figure SS-14-9.** NOESY spectrum of **19** (in CD<sub>3</sub>OD).

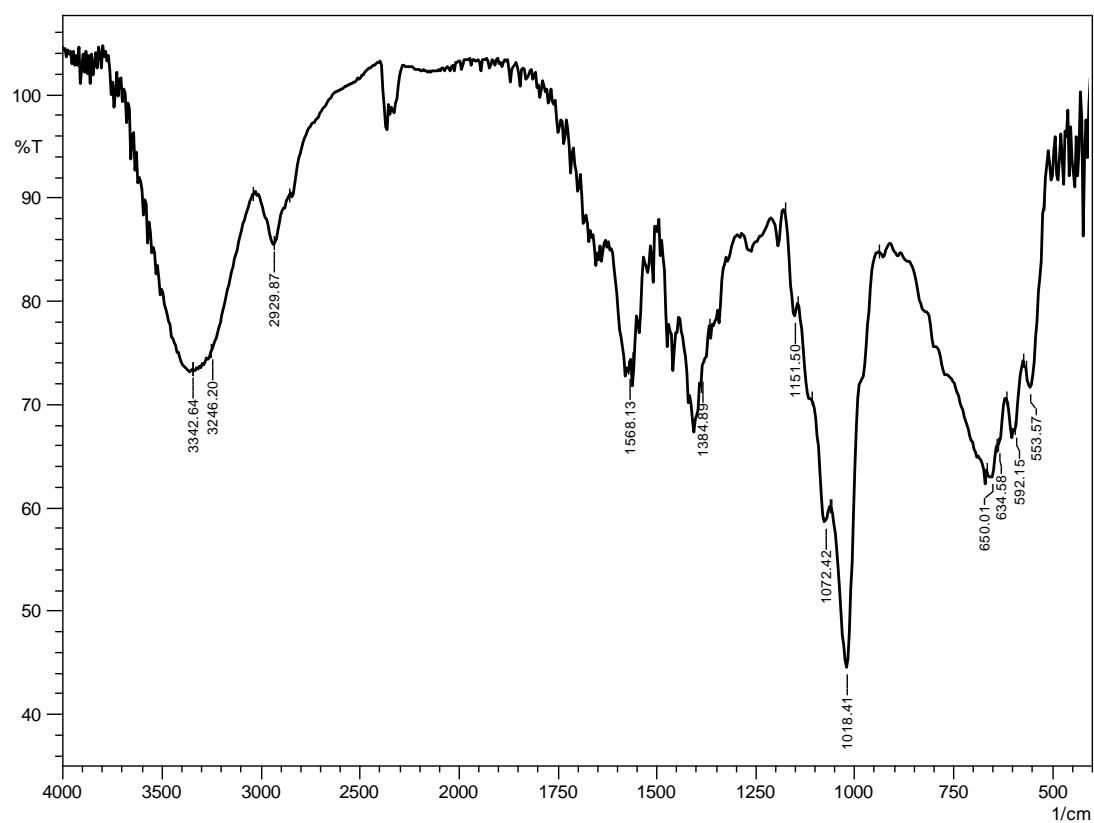

**Figure SS-15-1.** IR spectrum of **20**.



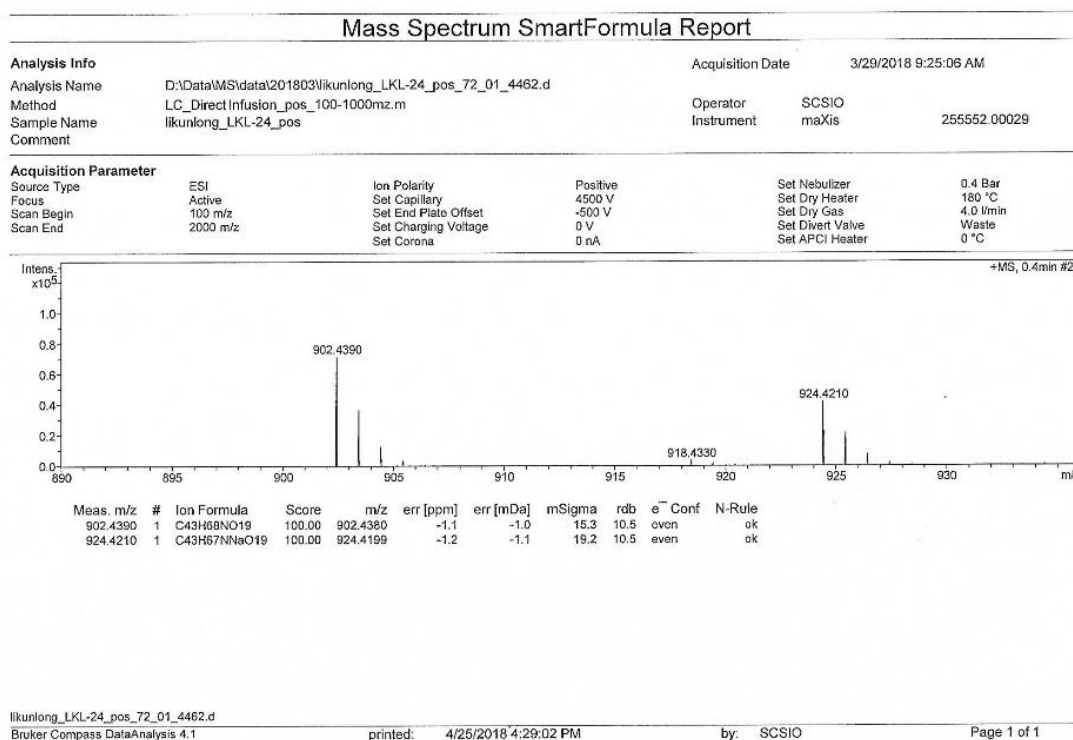

**Figure SS-15-2. HRESIMS (+) spectrum of 20.**

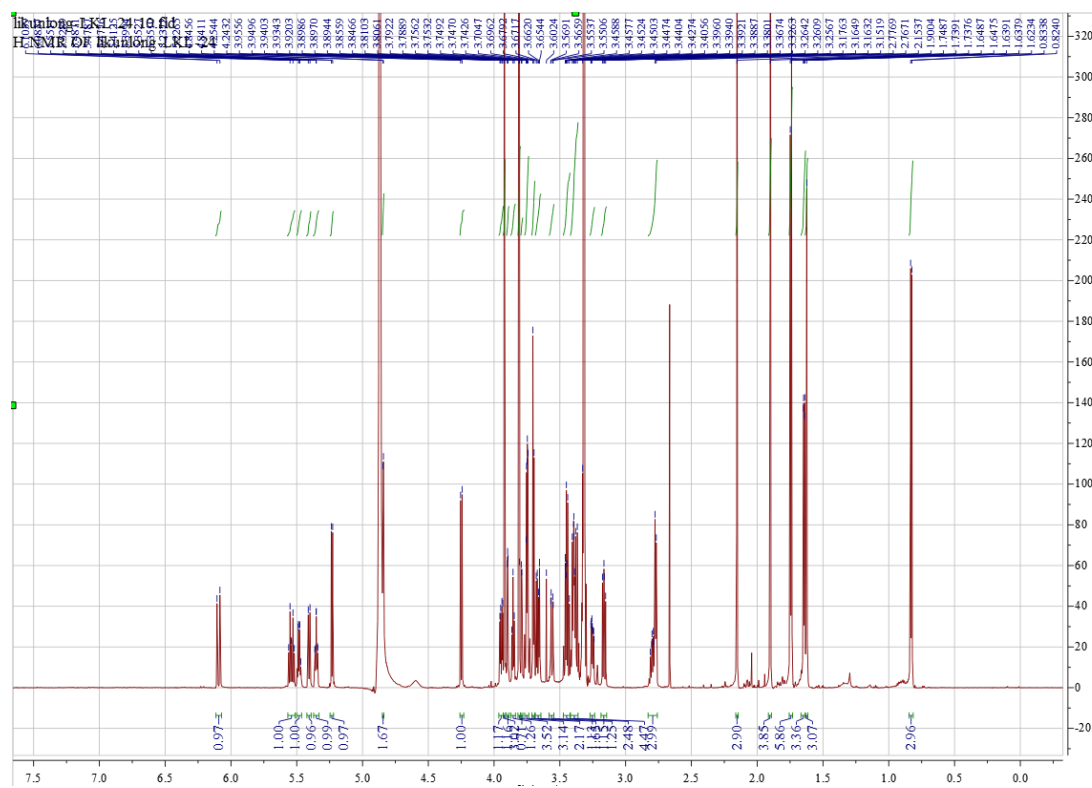

**Figure SS-15-3. <sup>1</sup>H NMR spectrum of 20 (in CD<sub>3</sub>OD, 700 MHz).**

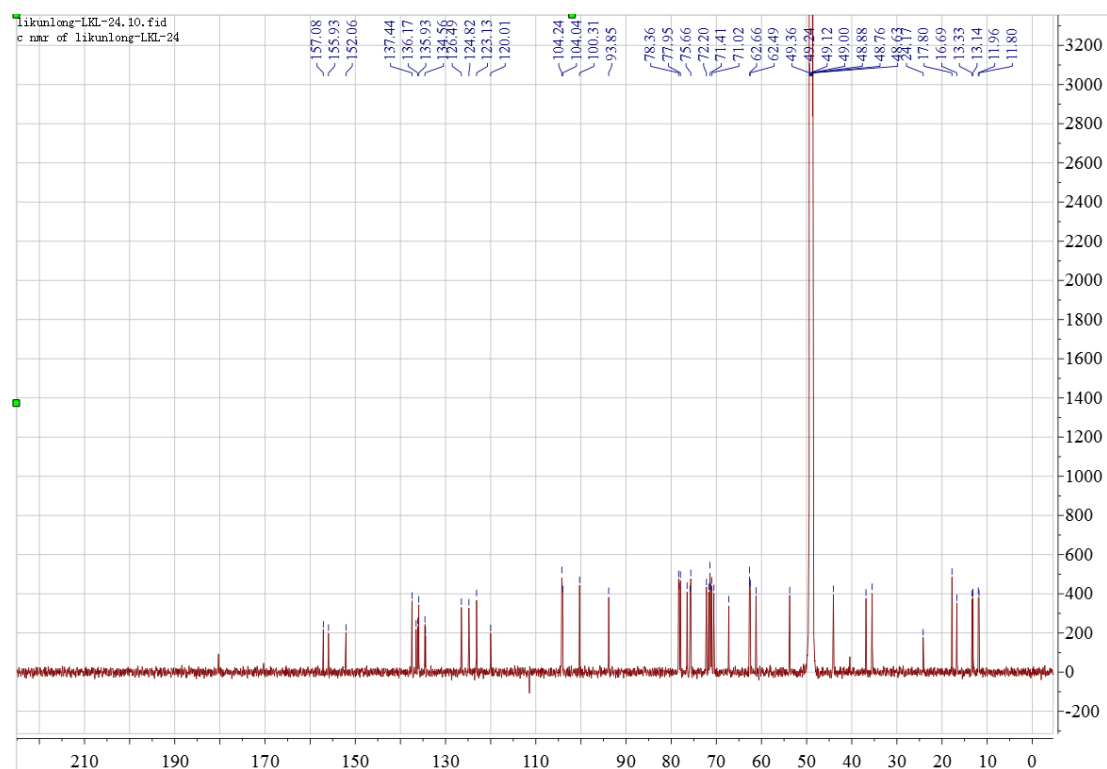

**Figure SS-15-4.**  $^{13}\text{C}$  NMR spectrum of **20** (in  $\text{CD}_3\text{OD}$ , 175 MHz).

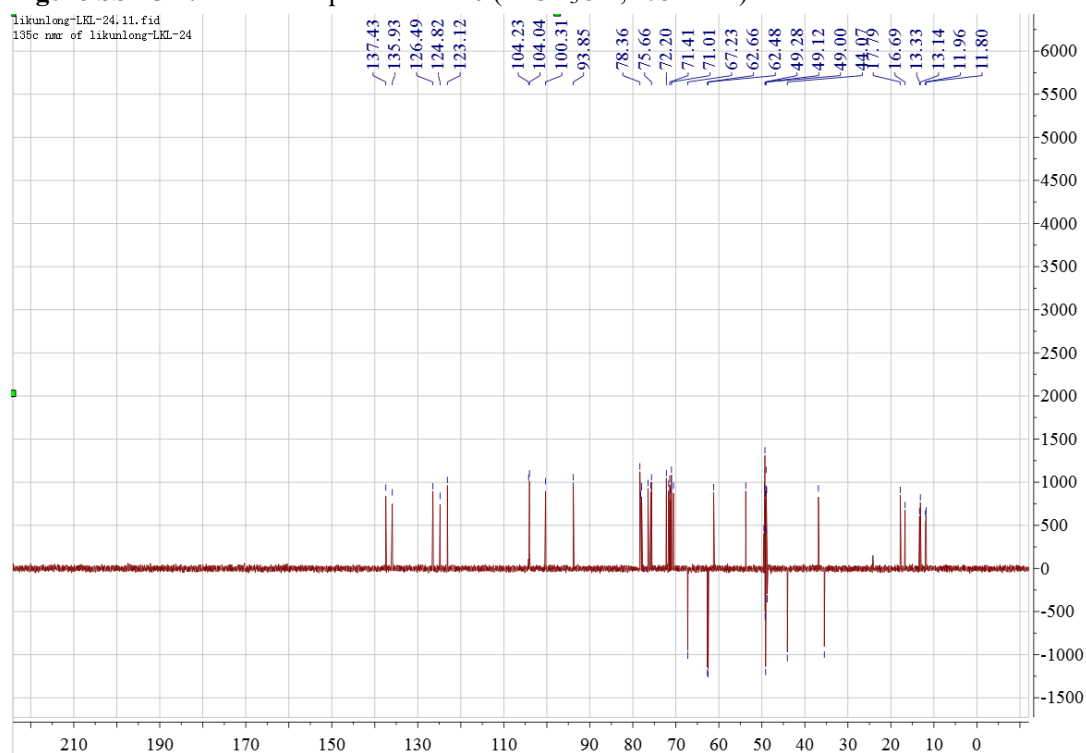

**Figure SS-15-5.** DEPT NMR spectrum of **20** (in  $\text{CD}_3\text{OD}$ , 175 MHz).

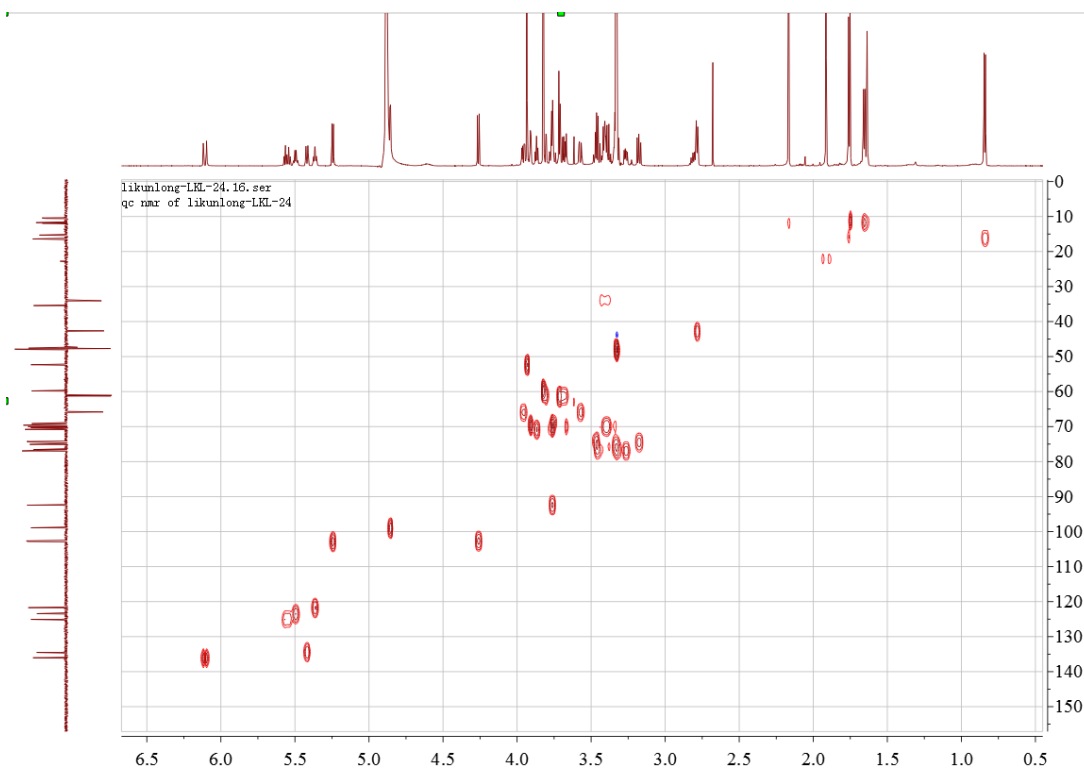

**Figure SS-15-6. HSQC spectrum of 20.**

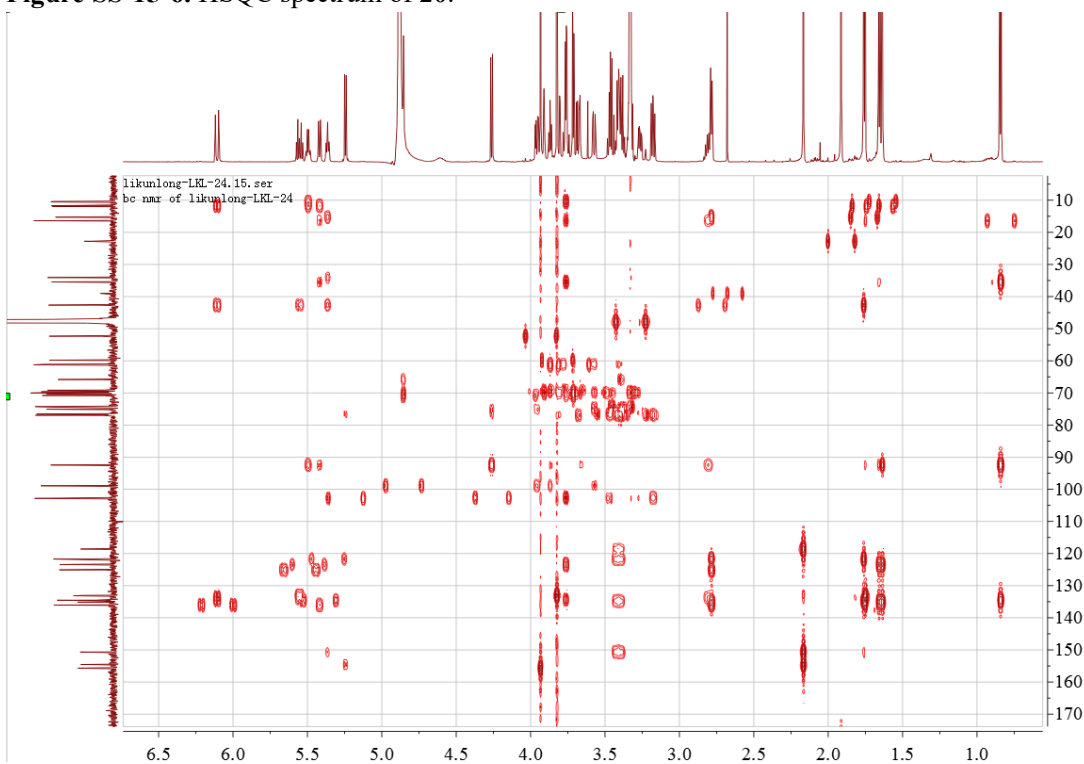

**Figure SS-15-7. HMBC spectrum of 20.**

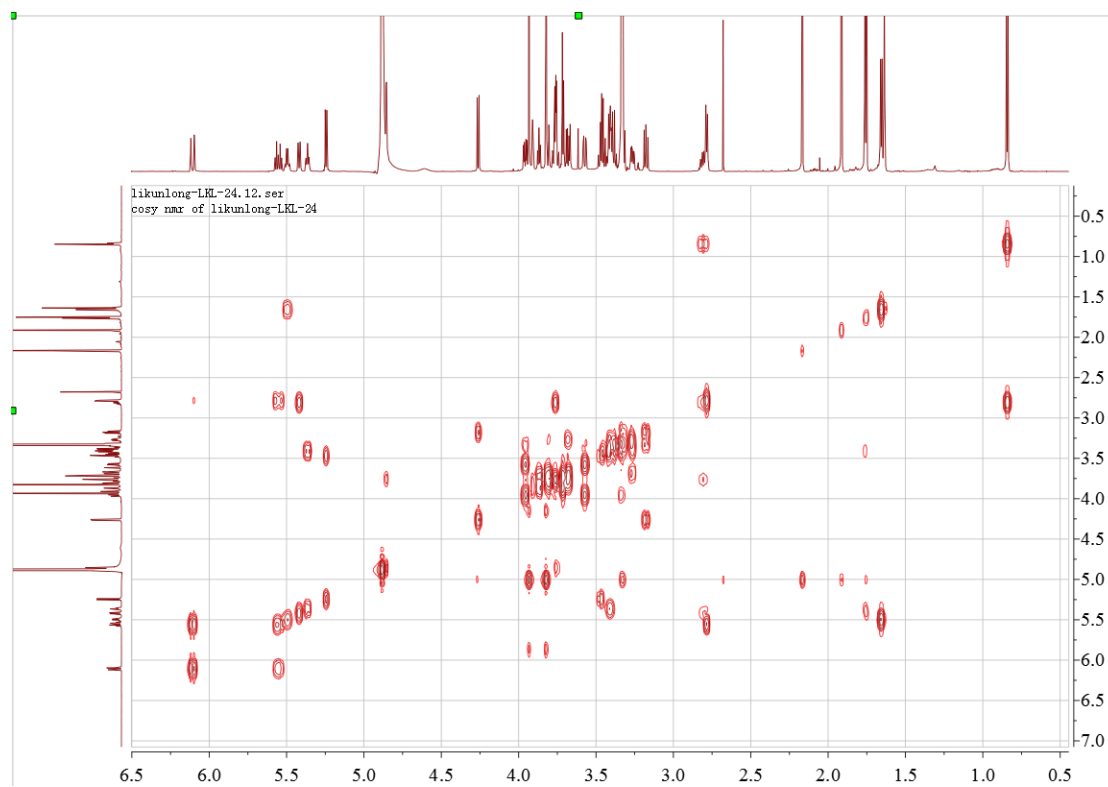

**Figure SS-15-8.** HMBC spectrum of **20**.

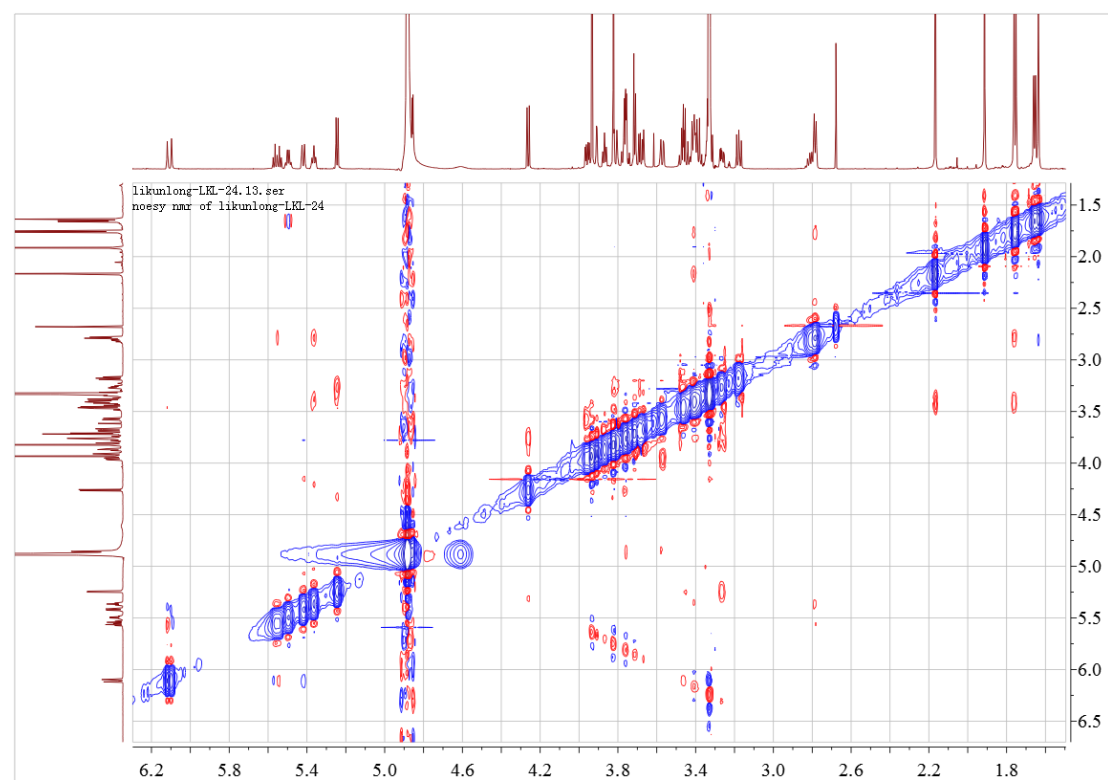

**Figure SS-15-9.** NOESY spectrum of **20**.

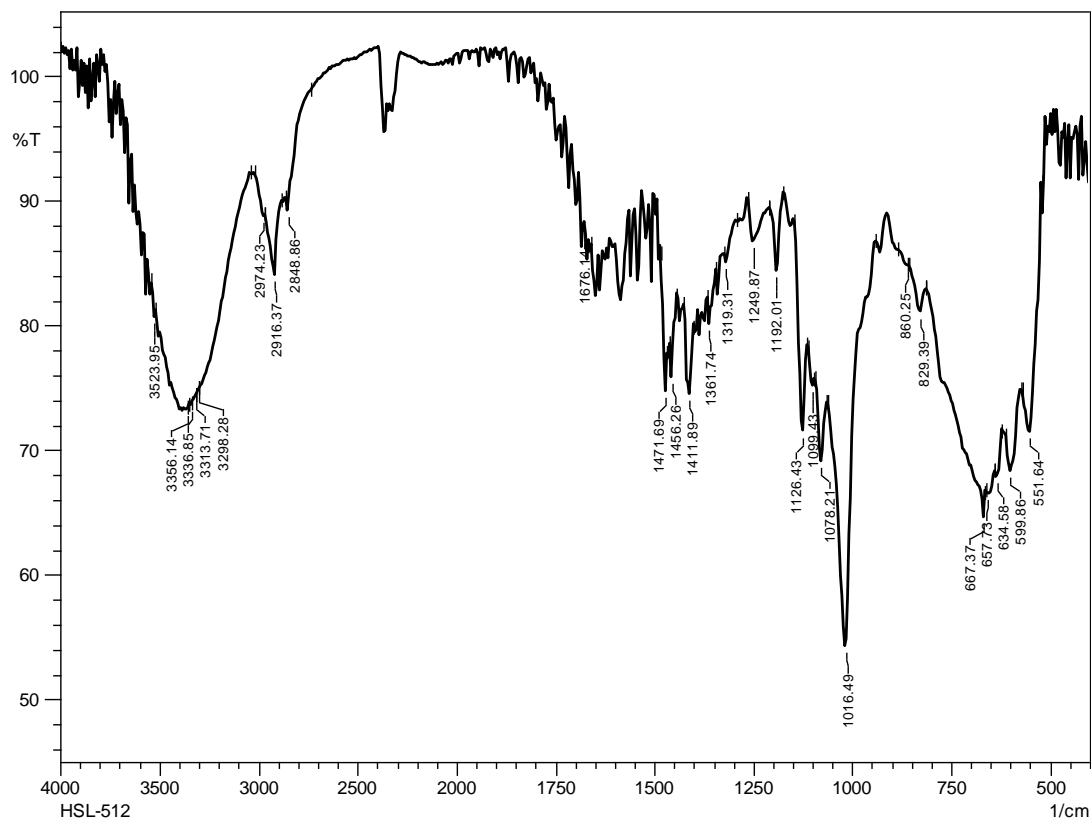

Figure SS-16-1. IR spectrum of 21.

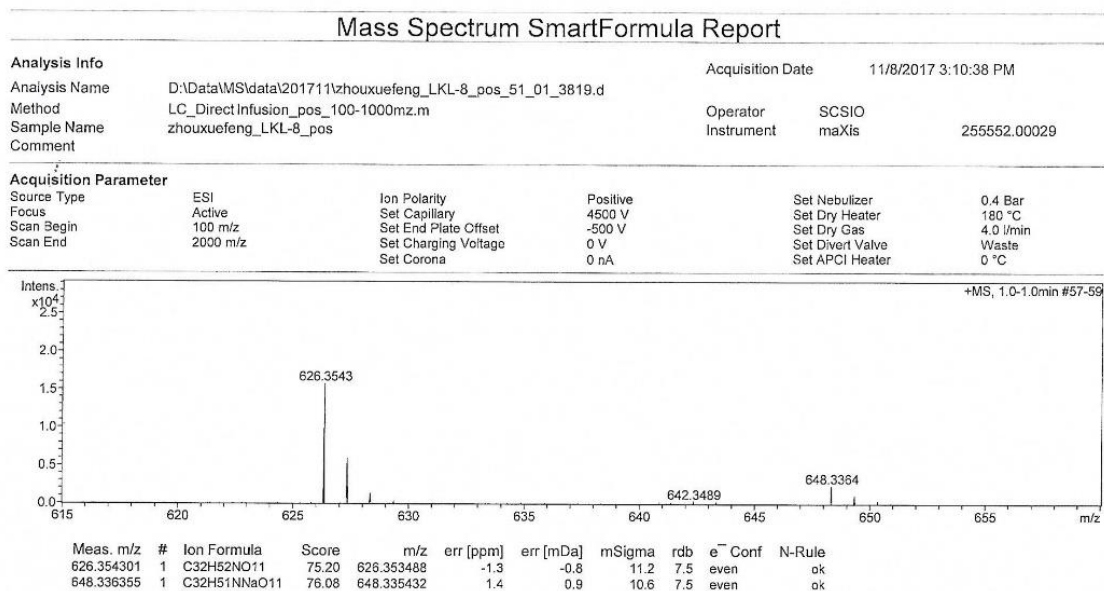

Figure SS-16-2. HRESIMS (+) spectrum of 21.



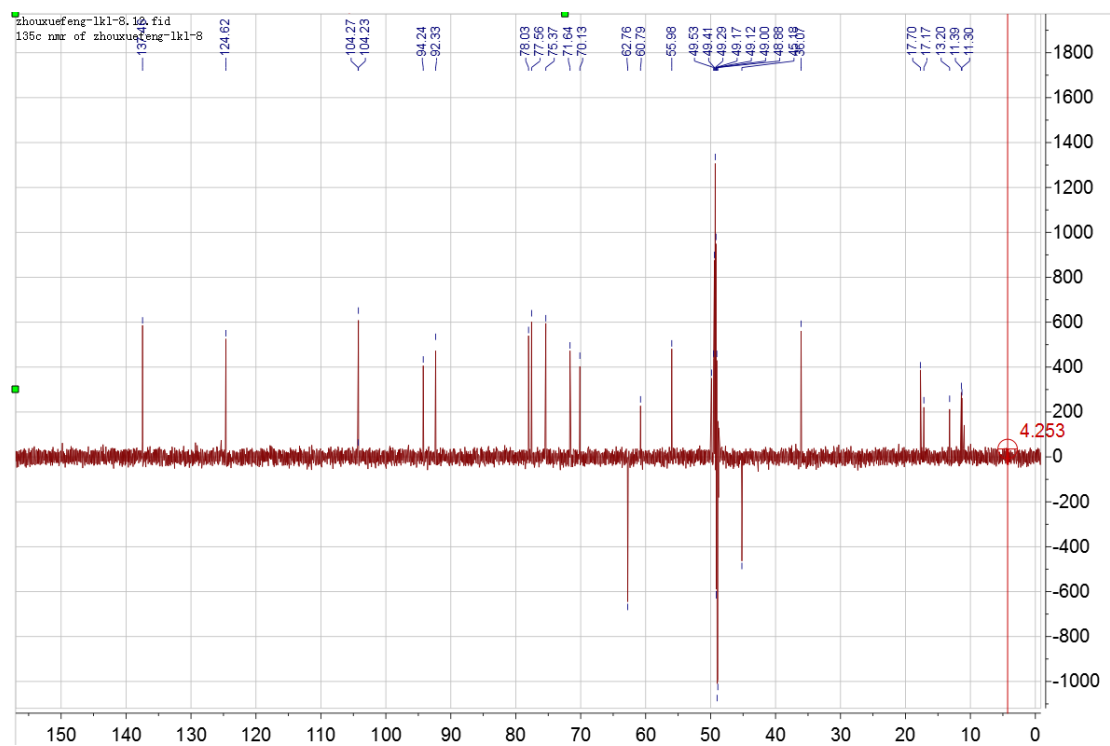

**Figure SS-16-5.** DEPT spectrum of **21** (in CD<sub>3</sub>OD, 175 MHz).

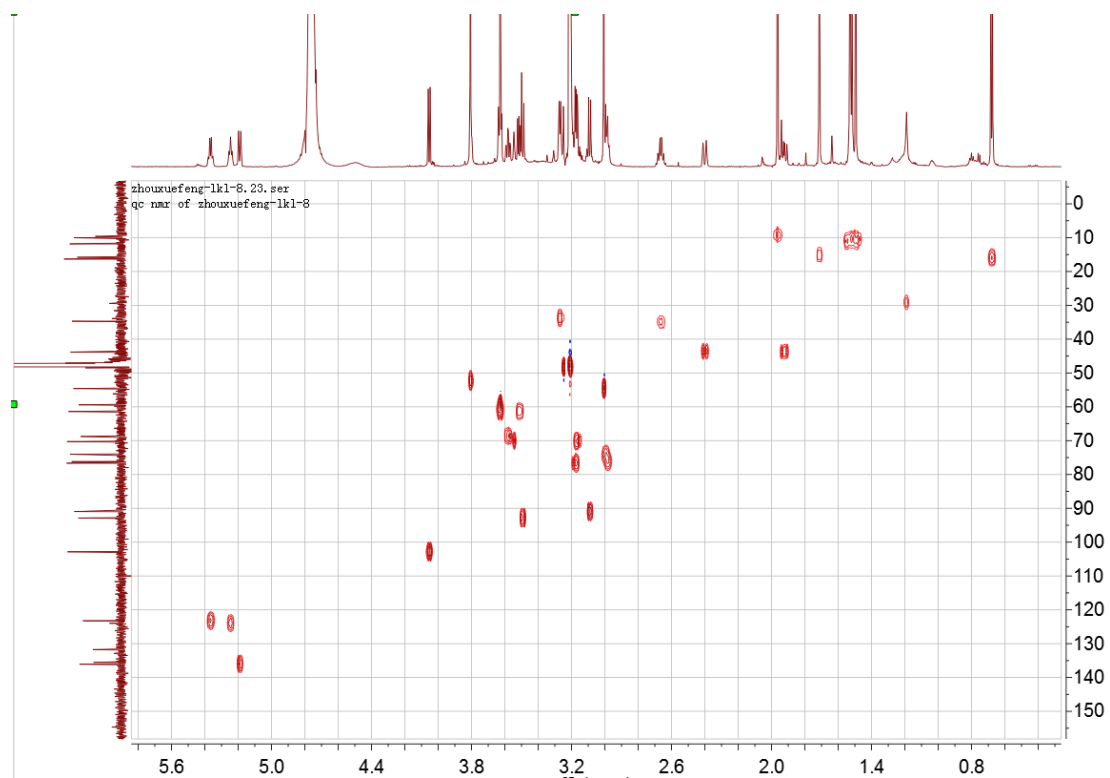

**Figure SS-16-6.** HSQC spectrum of **21** (in CD<sub>3</sub>OD).

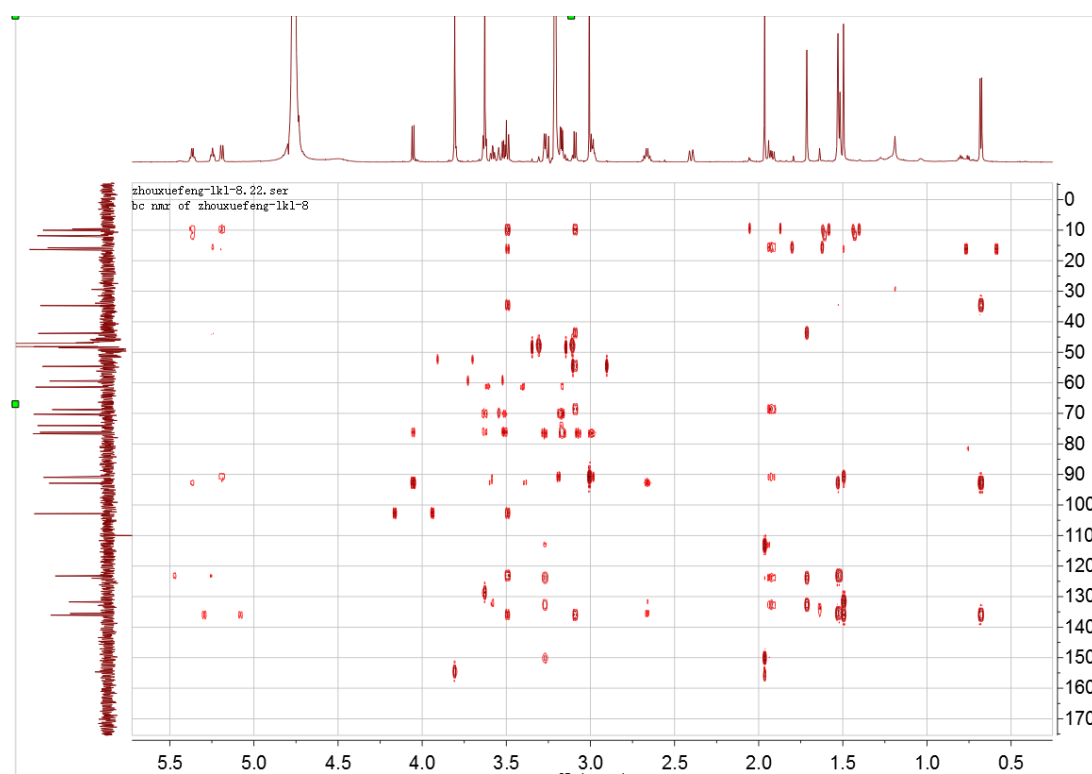

**Figure SS-16-7.** HMBC spectrum of **21** (in CD<sub>3</sub>OD).

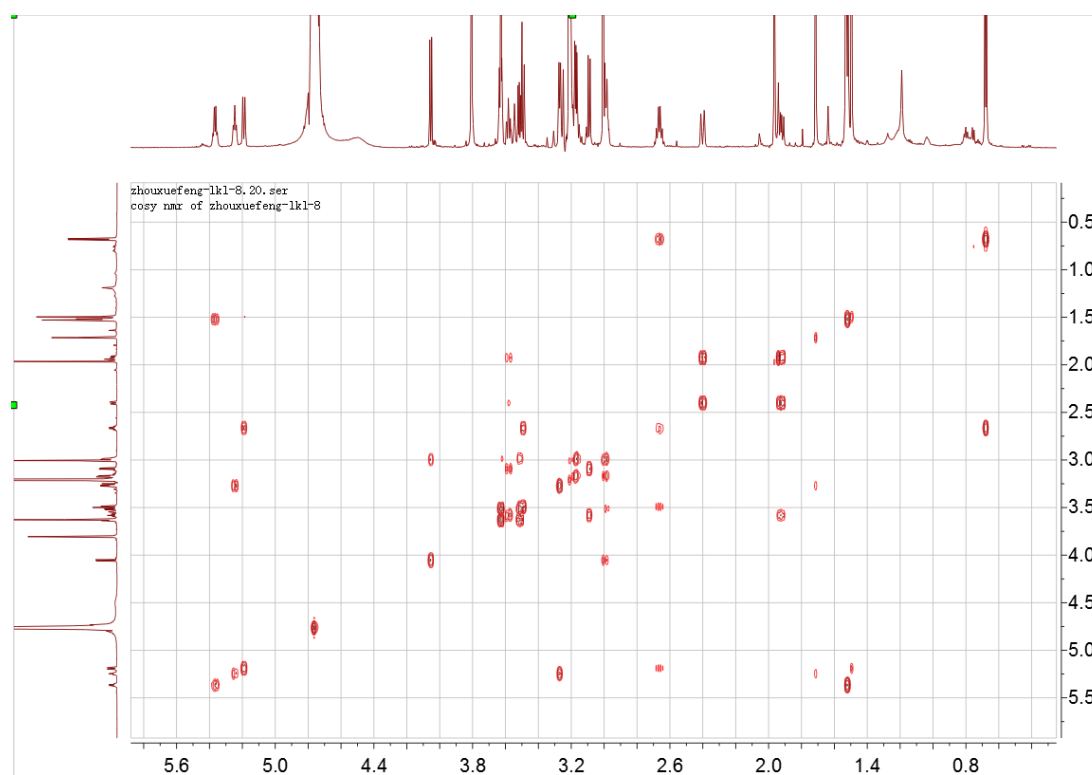

**Figure SS-16-8.** <sup>1</sup>H-<sup>1</sup>H COSY spectrum of **21** (in CD<sub>3</sub>OD).



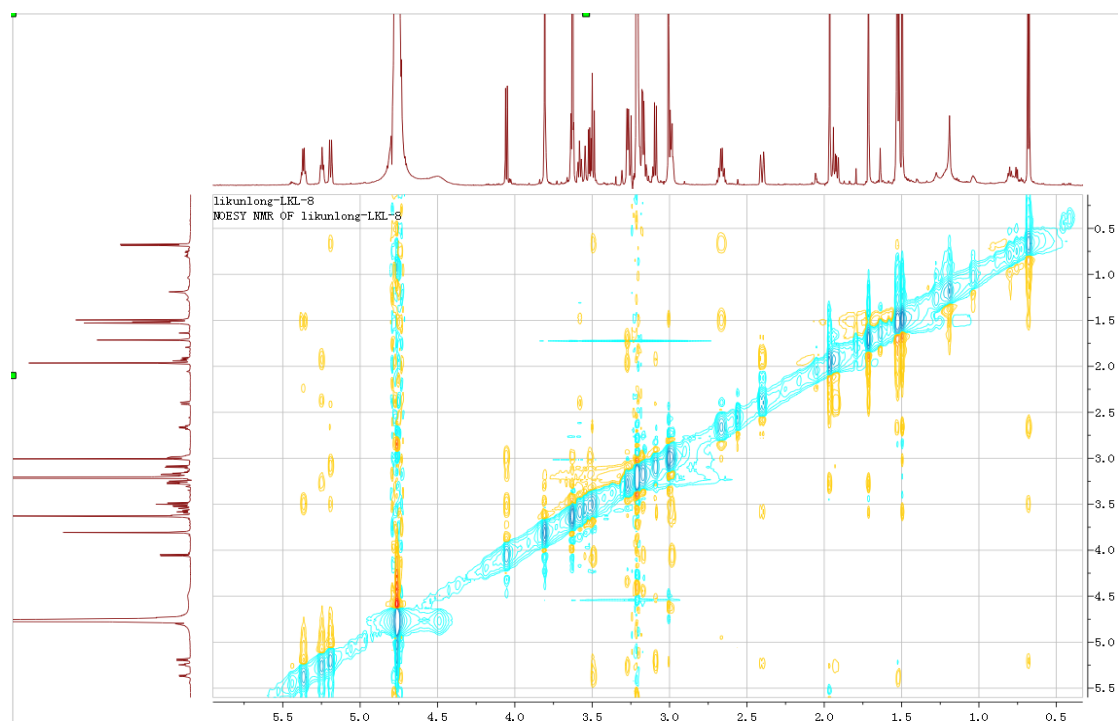

**Figure SS-16-9.** NOESY spectrum of **21** (in CD<sub>3</sub>OD).

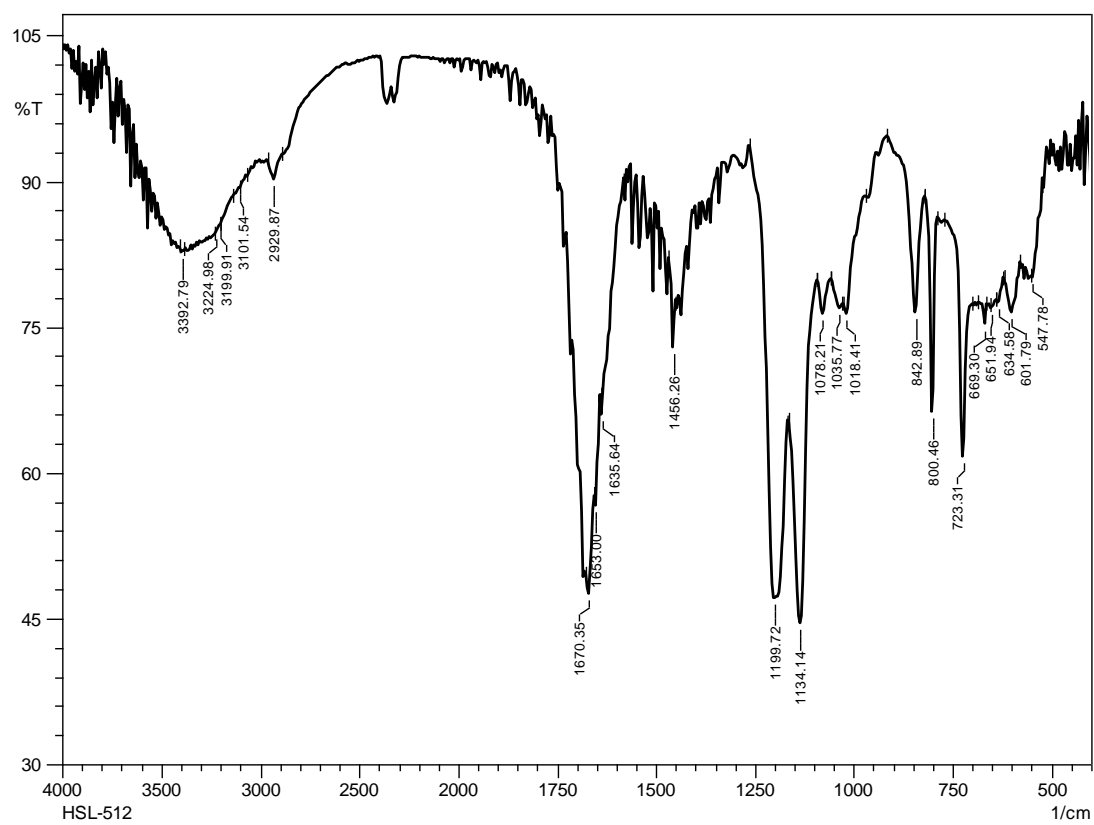

**Figure SS-17-1.** IR spectrum of **22**.

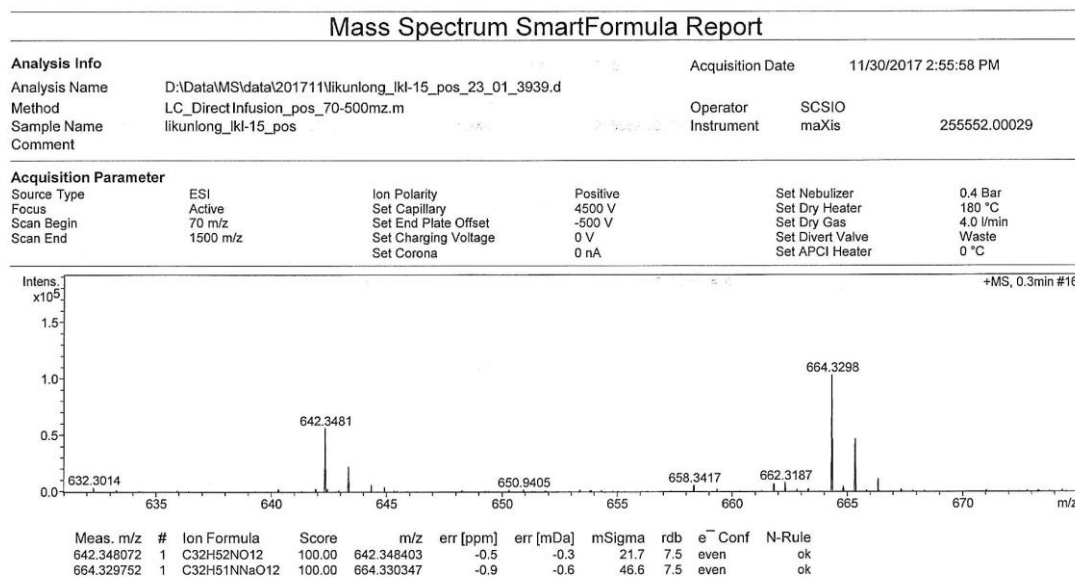

**Figure SS-17-2.** HRESIMS (+) spectrum of **22**.

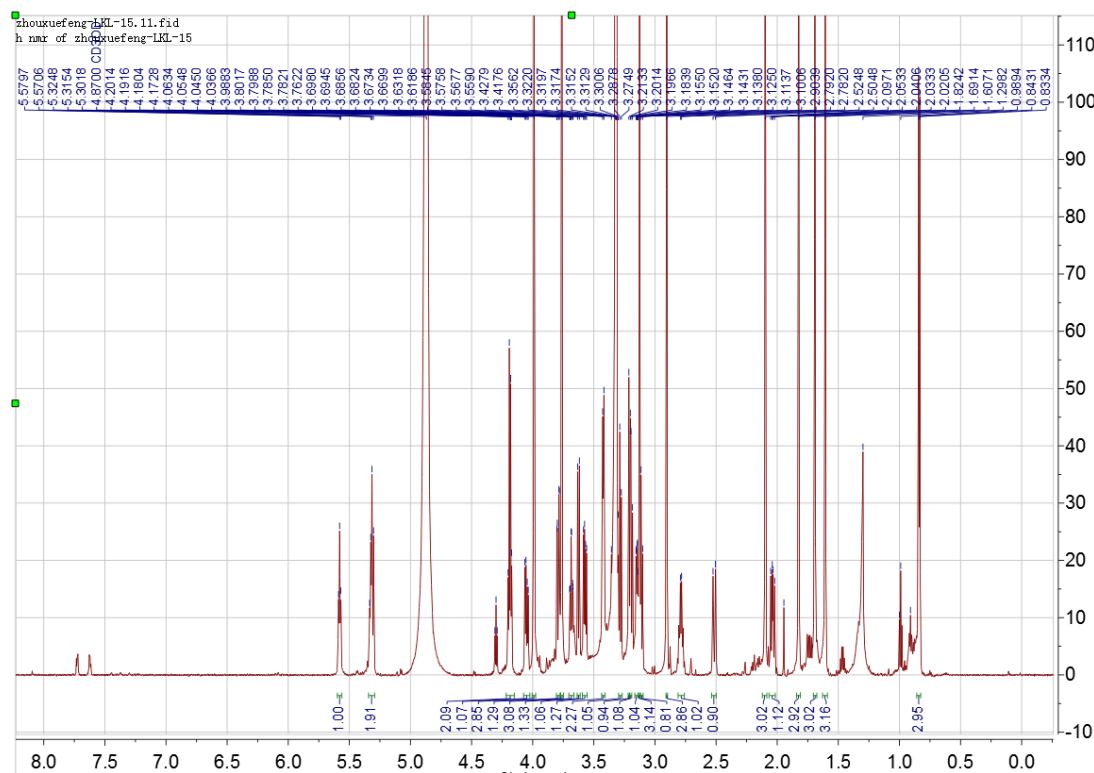

**Figure SS-17-3.** <sup>1</sup>H NMR spectrum of **22** (in CD<sub>3</sub>OD, 700 MHz).

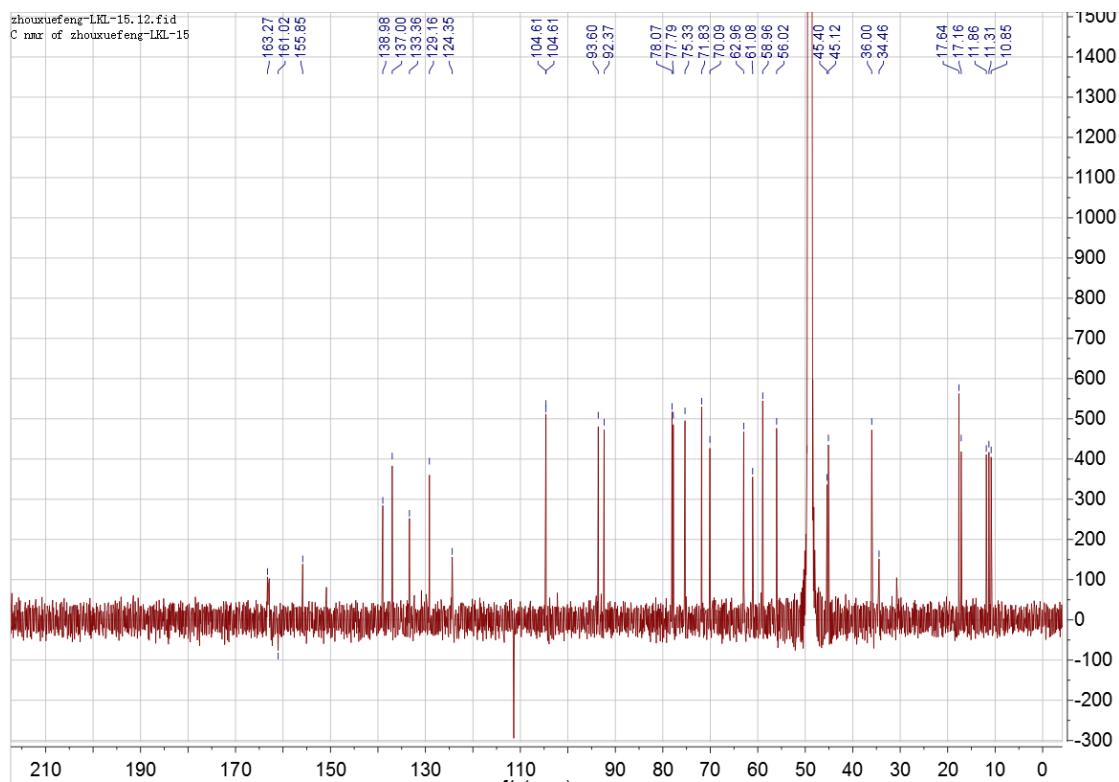

**Figure SS-17-4.**  $^{13}\text{C}$  NMR spectrum of **22** (in  $\text{CD}_3\text{OD}$ , 175 MHz).

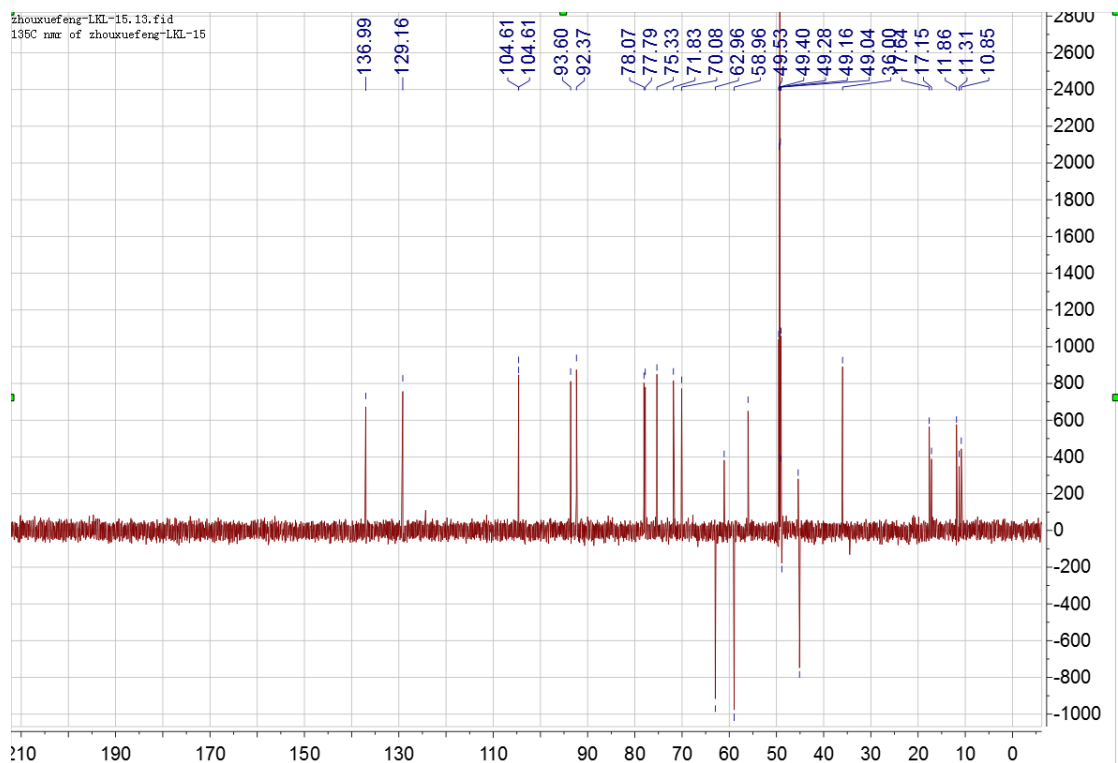

**Figure SS-17-5.** DEPT spectrum of **22** (in  $\text{CD}_3\text{OD}$ , 175 MHz).

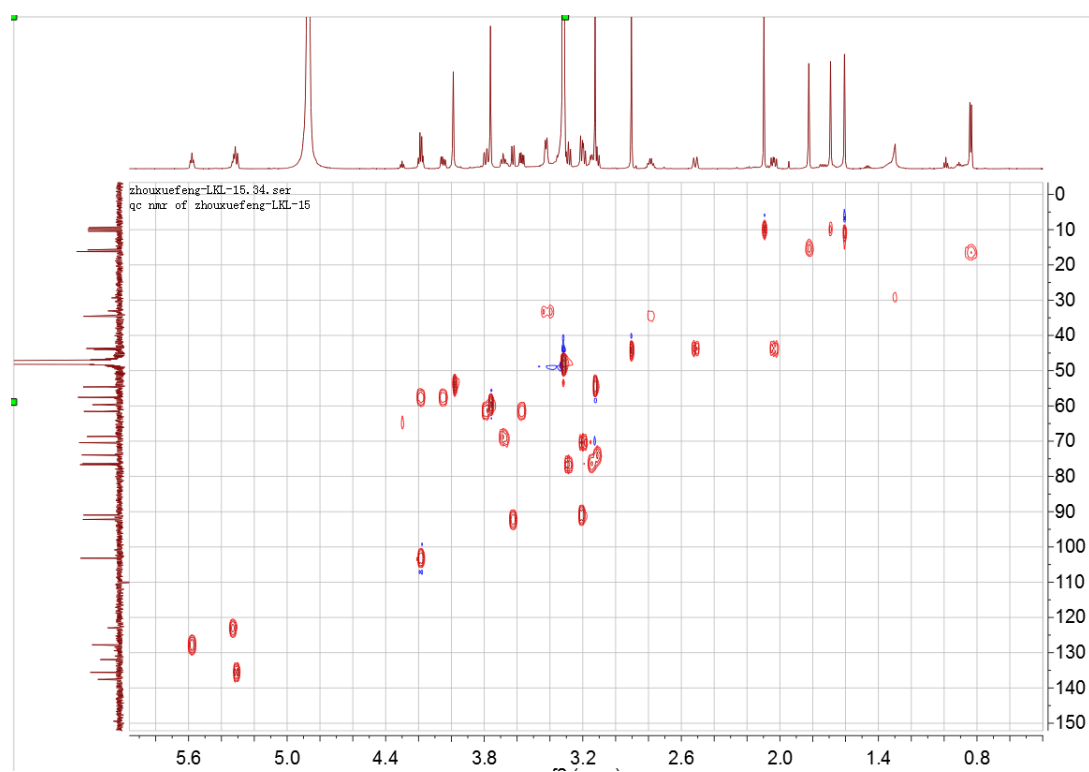

**Figure SS-17-6.** HSQC spectrum of **22** (in CD<sub>3</sub>OD).

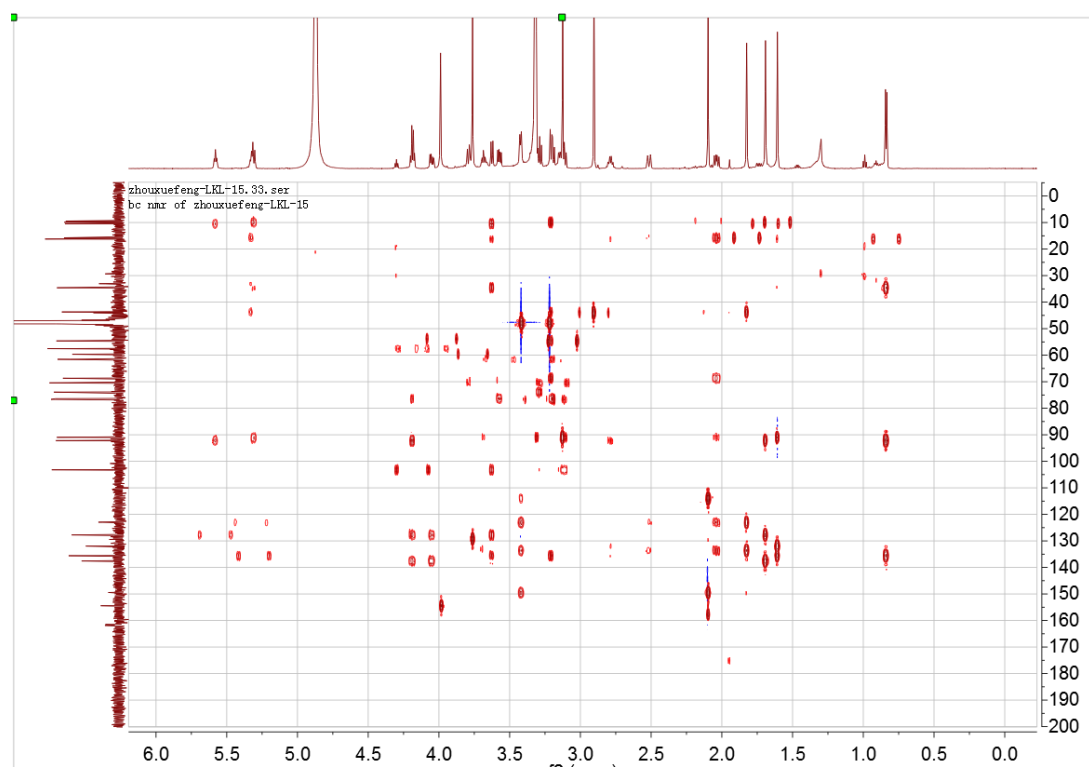

**Figure SS-17-7.** HMBC spectrum of **22** (in CD<sub>3</sub>OD).

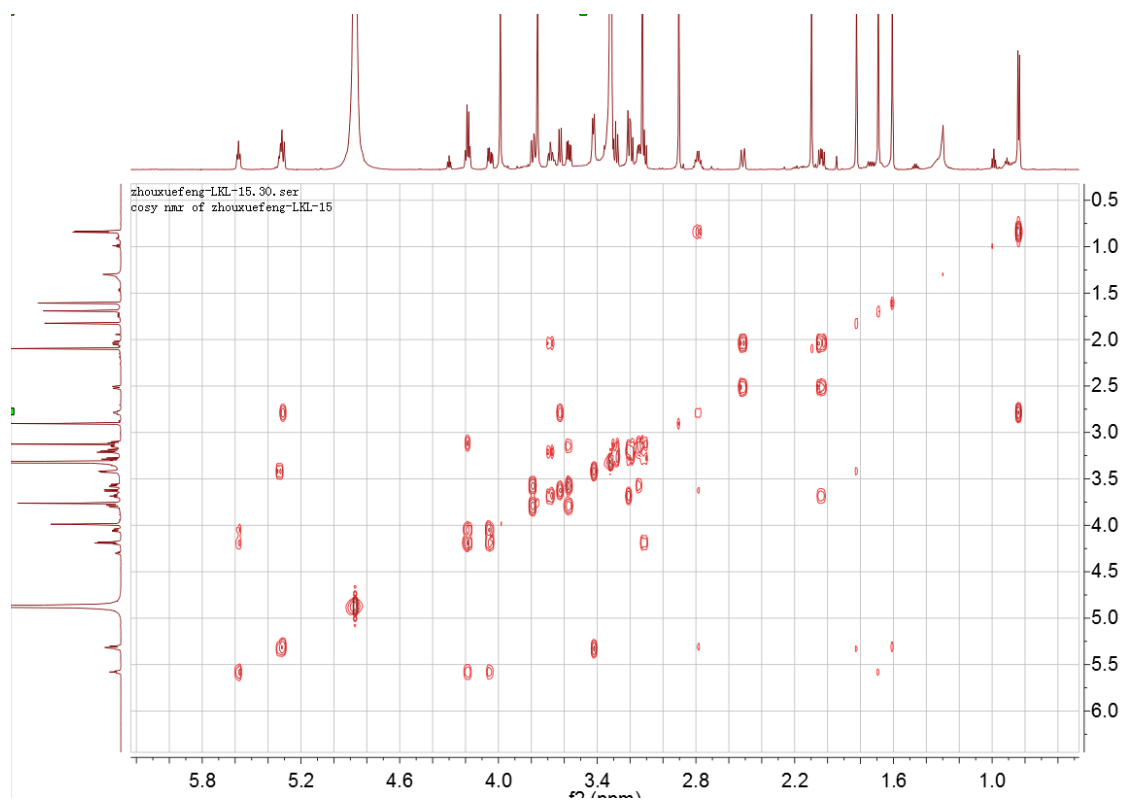

**Figure SS-17-8.**  $^1\text{H}$ - $^1\text{H}$  COSY spectrum of **22** (in  $\text{CD}_3\text{OD}$ ).

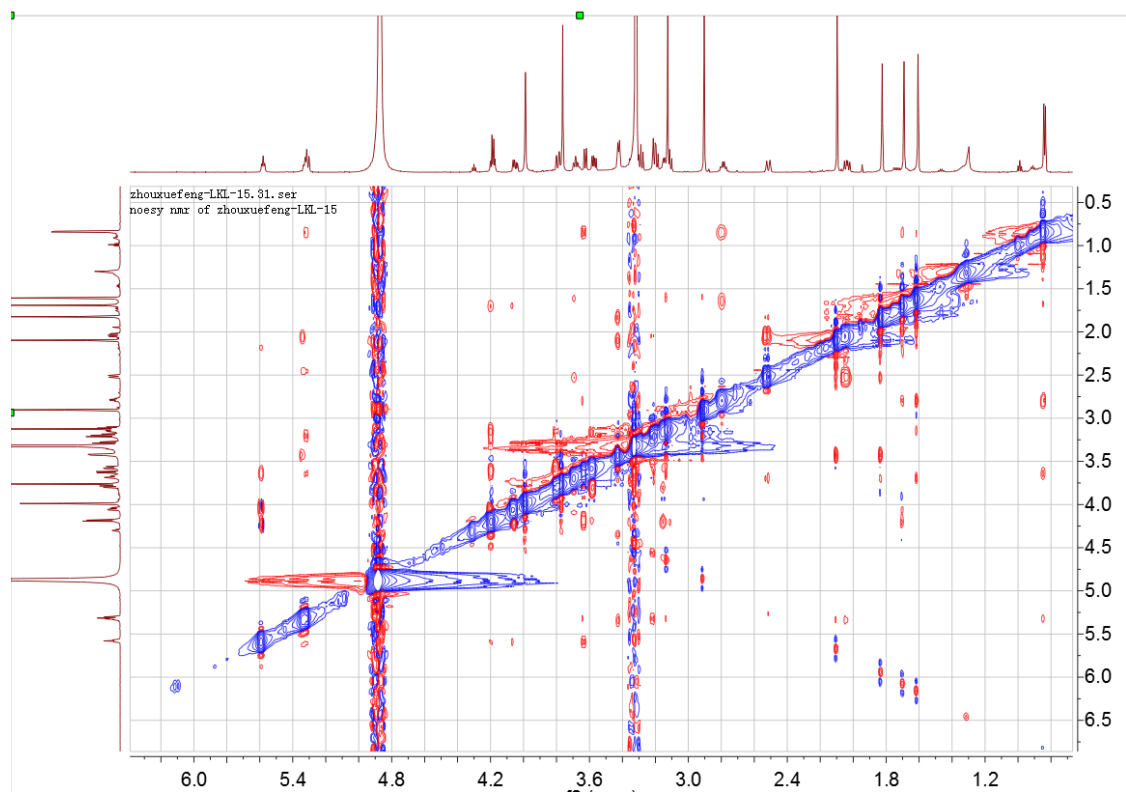

**Figure SS-17-9.** NOESY spectrum of **22** (in  $\text{CD}_3\text{OD}$ ).

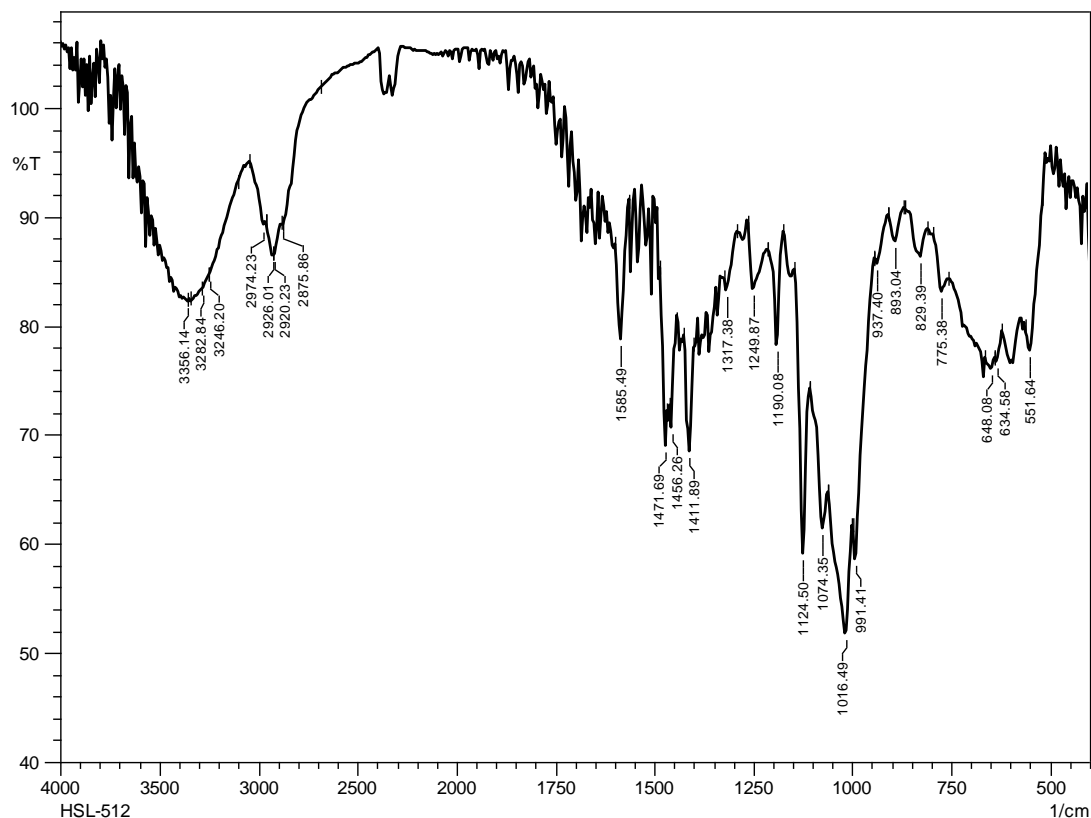

Figure SS-18-1. IR spectrum of **23**.

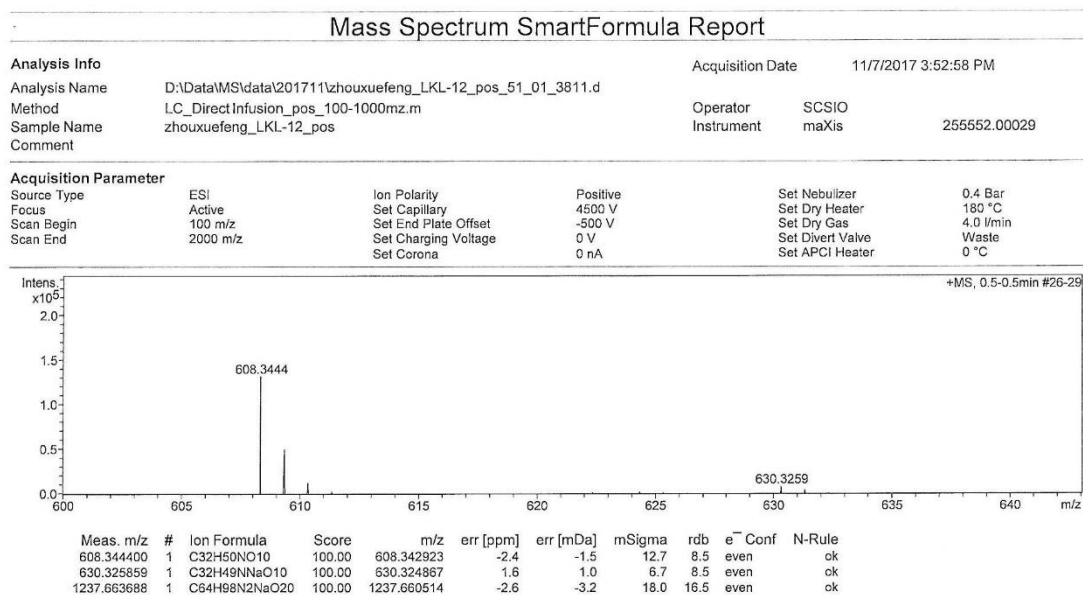

zhouxuefeng\_LKL-12\_pos\_51\_01\_3811.d

Bruker Compass DataAnalysis 4.1

printed: 11/7/2017 3:57:49 PM

by: SCSIO

Page 1 of 1

Figure SS-18-2. HRESIMS (+) spectrum of **23**.

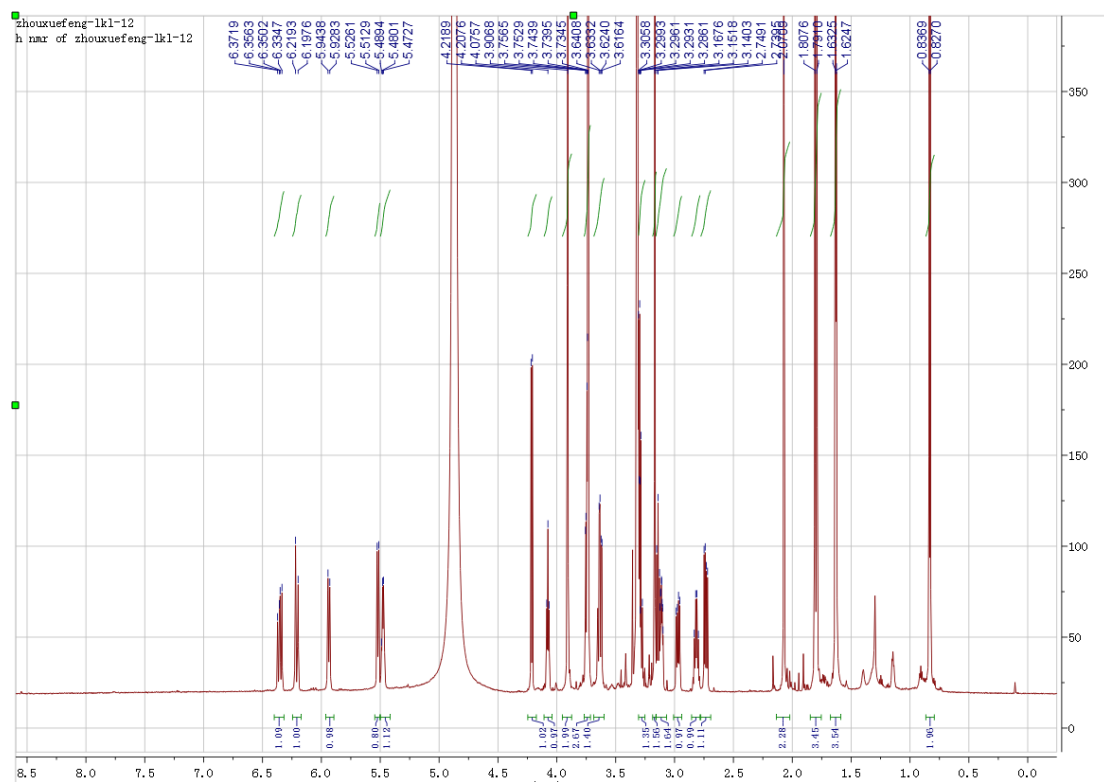

Figure SS-18-3.  $^1\text{H}$  NMR spectrum of **23** (in  $\text{CD}_3\text{OD}$ , 700 MHz).

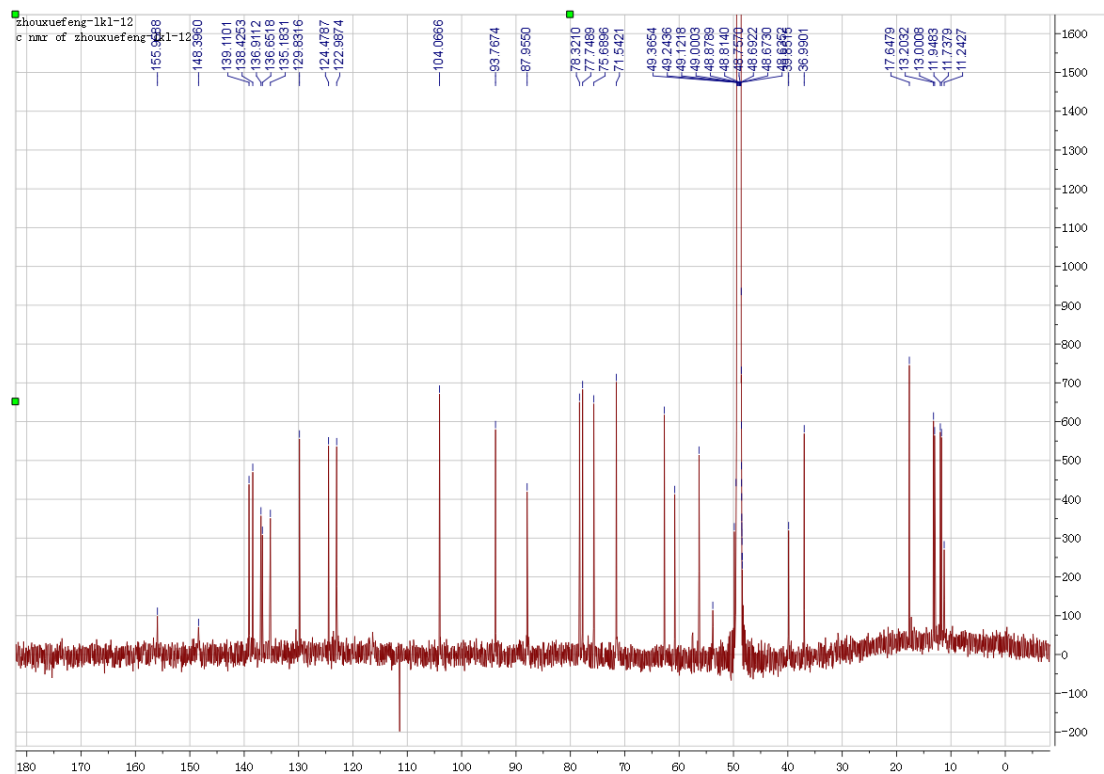

Figure SS-18-4.  $^{13}\text{C}$  NMR spectrum of **23** (in  $\text{CD}_3\text{OD}$ , 175 MHz).

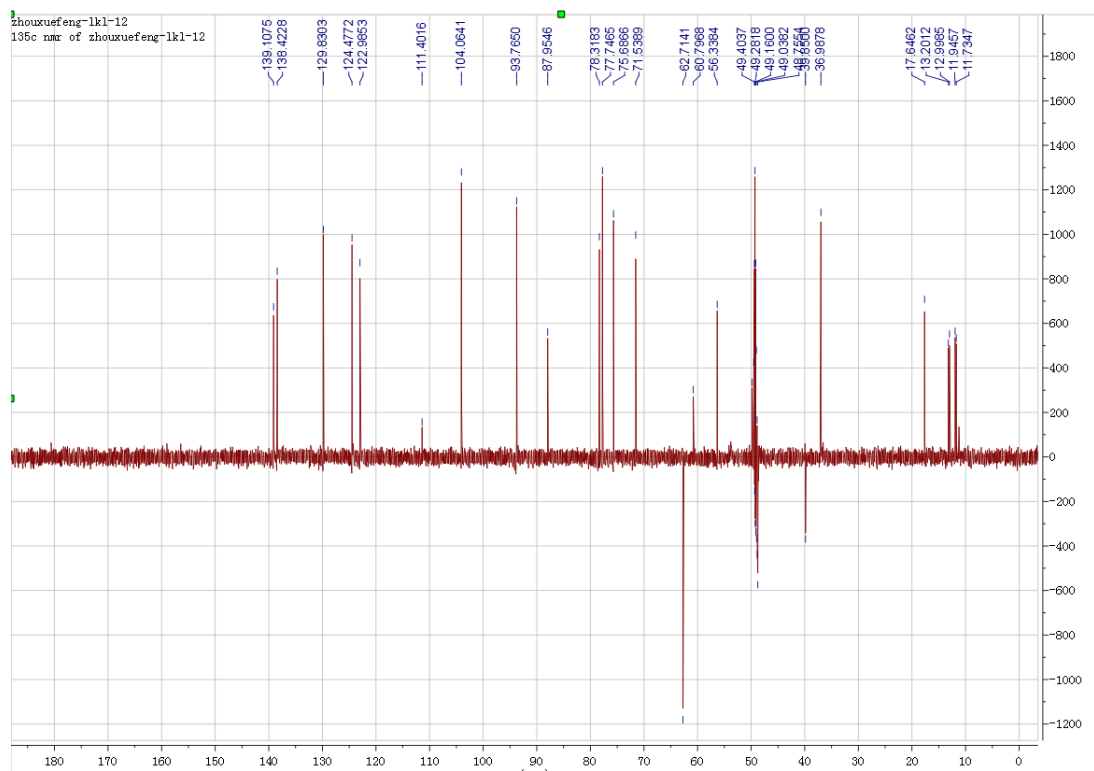

Figure SS-18-5. DEPT spectrum of **23** (in CD<sub>3</sub>OD, 175 MHz).

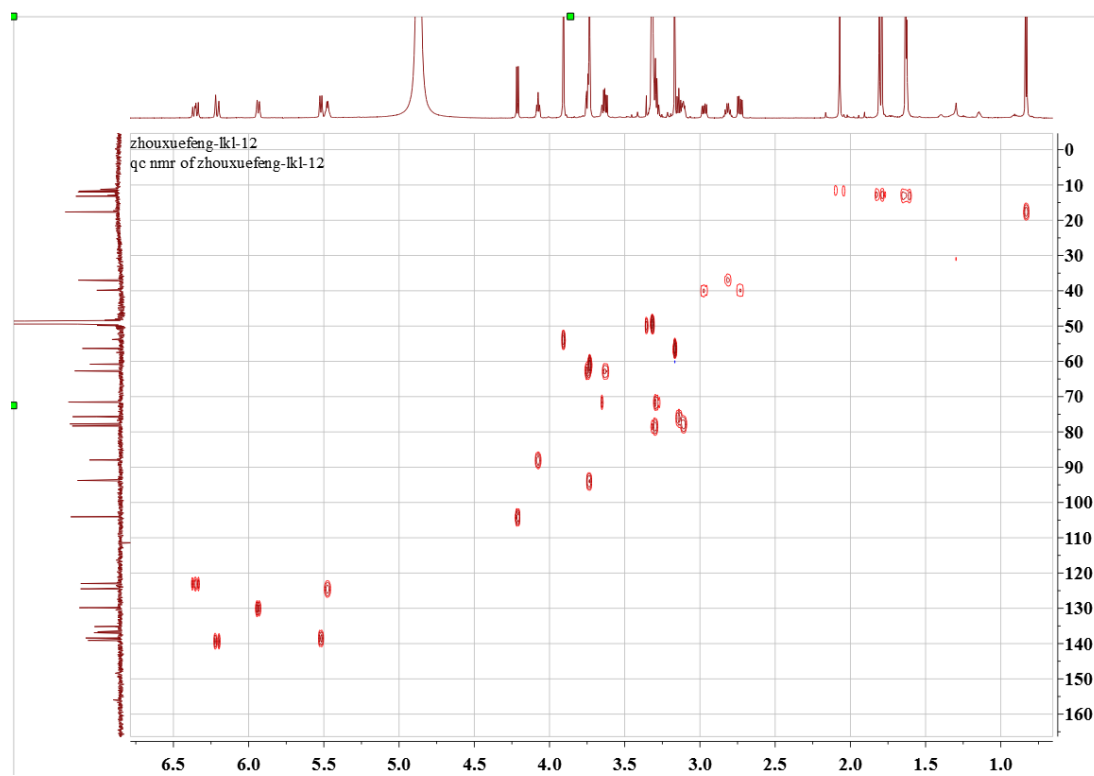

Figure SS-18-6. HSQC spectrum of **23** (in CD<sub>3</sub>OD).



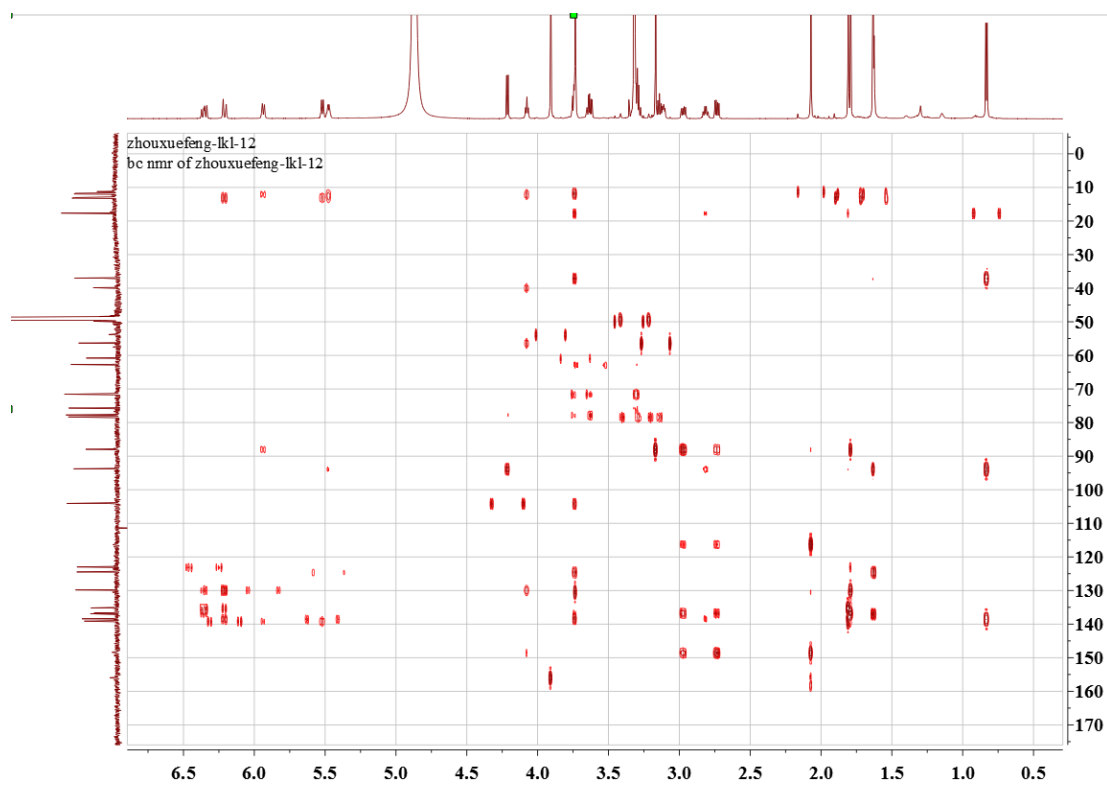

Figure SS-18-7. HMBC spectrum of **23** (in CD<sub>3</sub>OD).

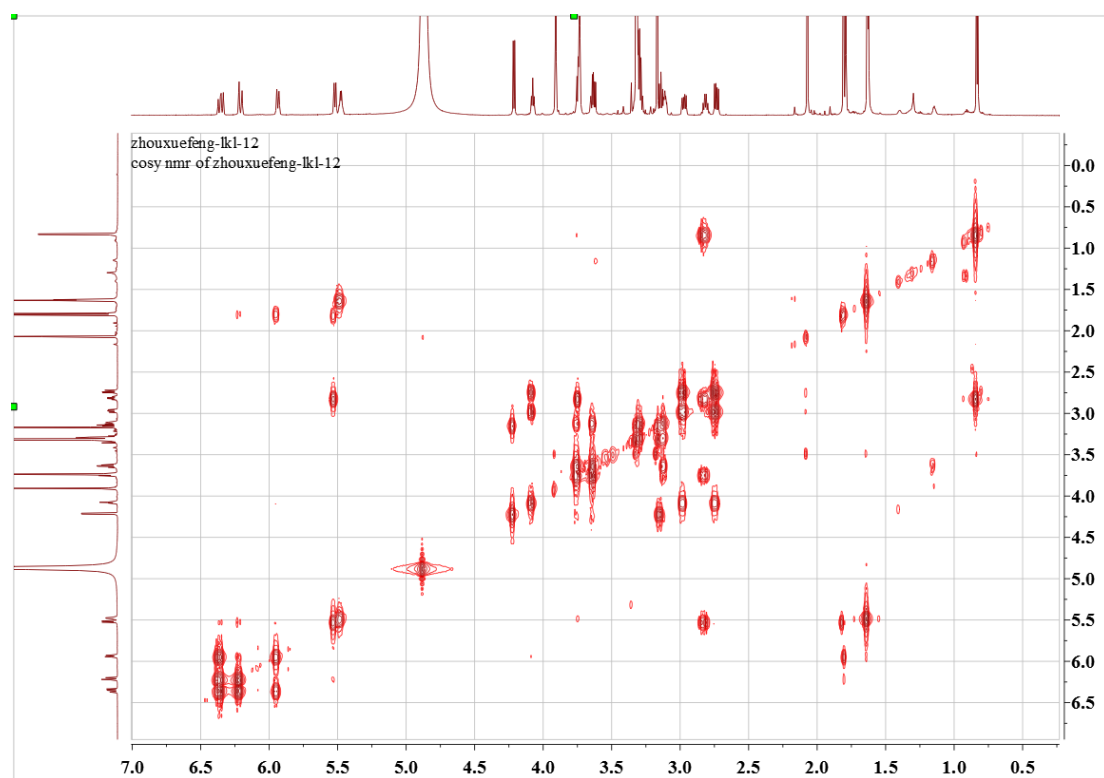

Figure SS-18-8. <sup>1</sup>H-<sup>1</sup>H COSY spectrum of **23** (in CD<sub>3</sub>OD).

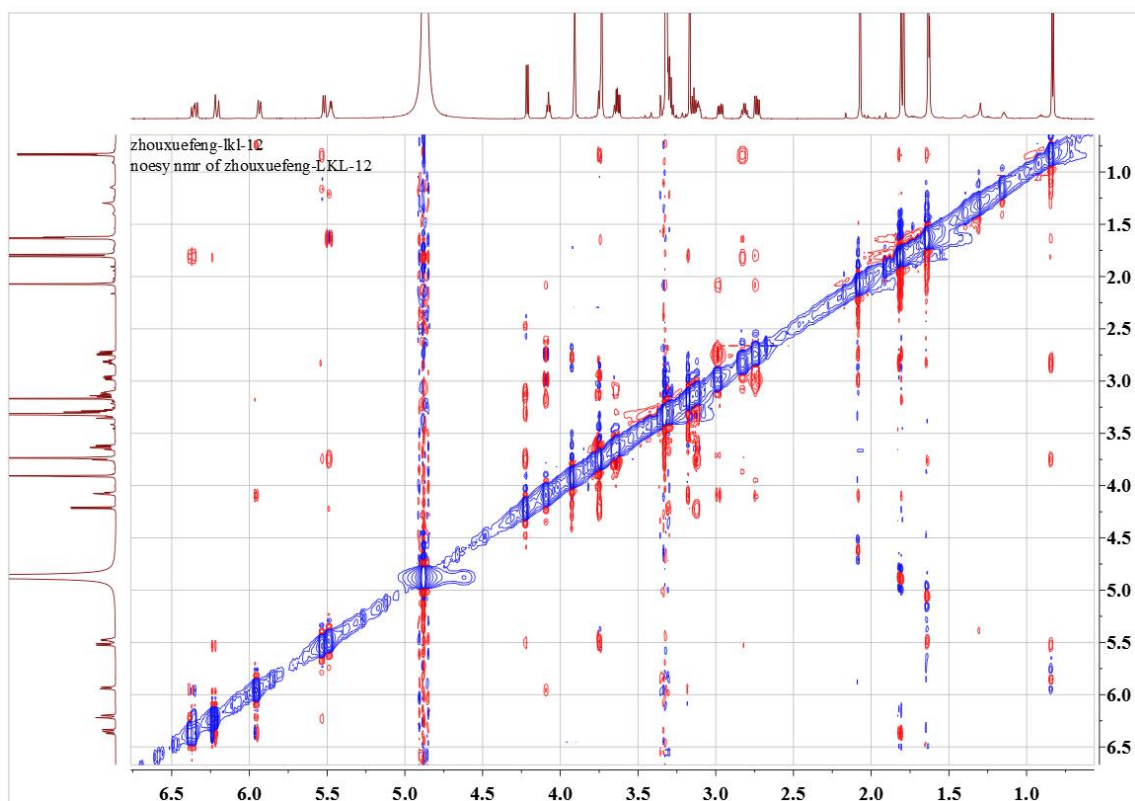

Figure SS-18-9. NOESY spectrum of **23** (in CD<sub>3</sub>OD).

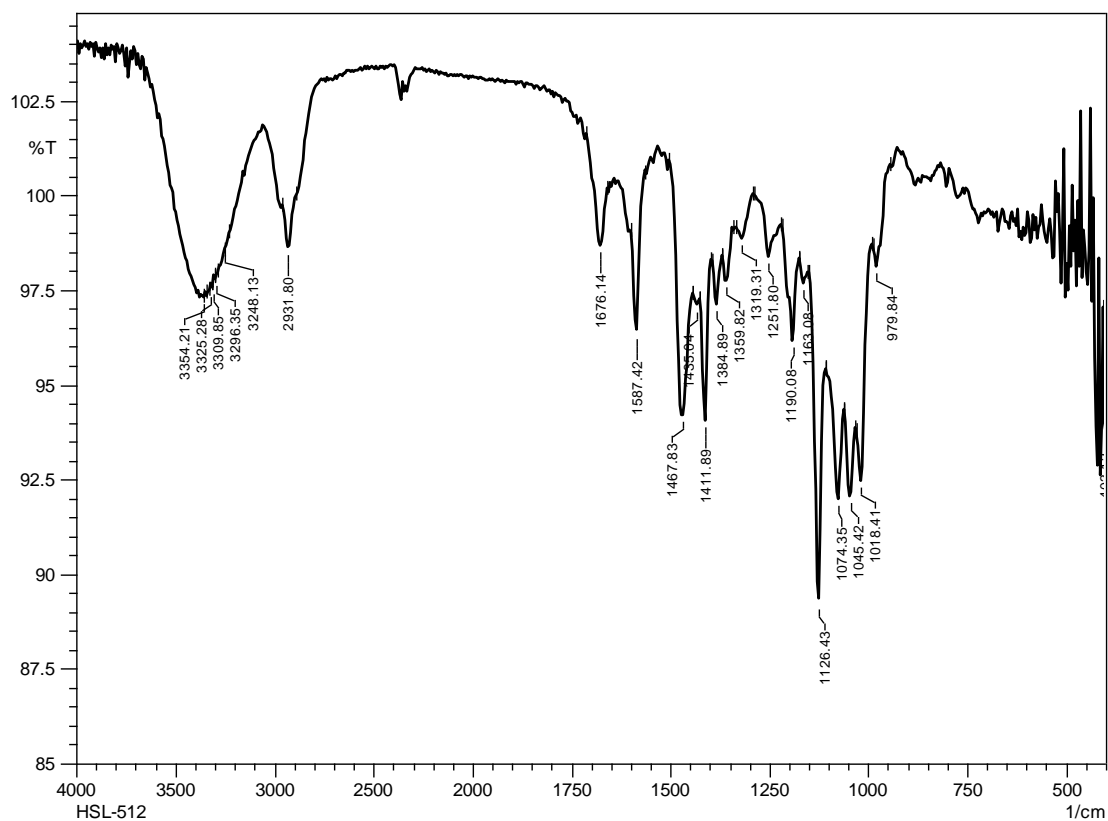

Figure SS-19-1. IR spectrum of **24**.



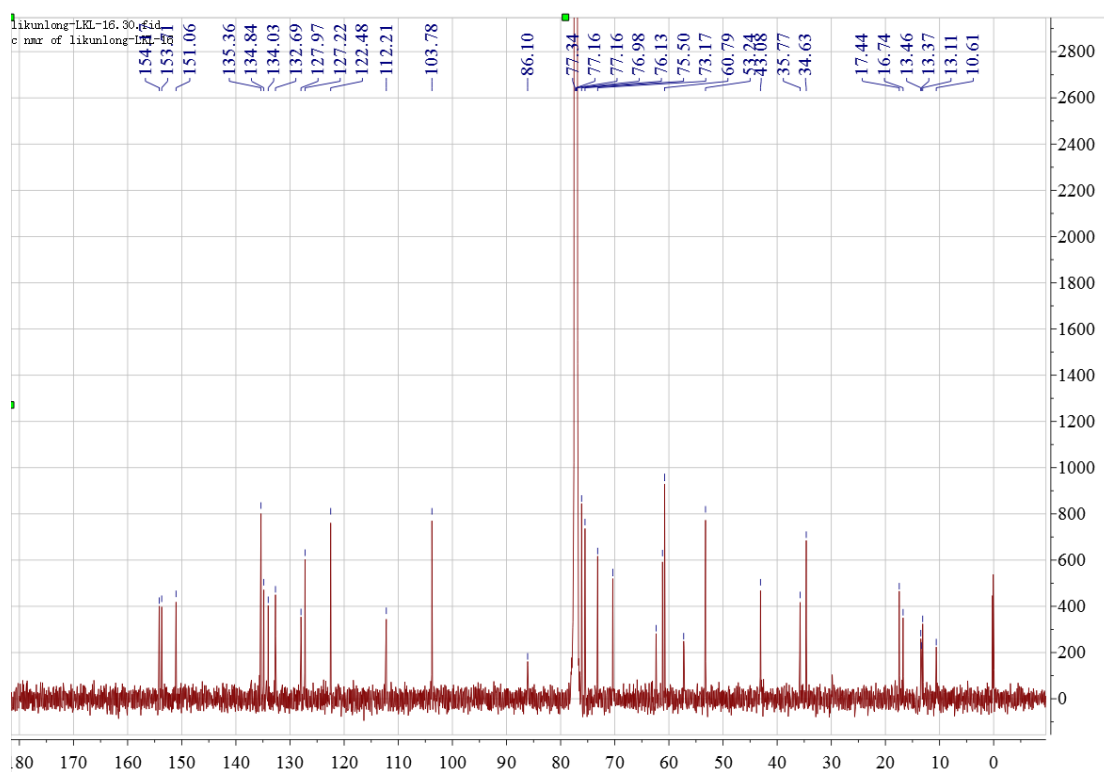

**Figure SS-19-4.**  $^{13}\text{C}$  NMR spectrum of **24** (in  $\text{CDCl}_3$ , 175 MHz).

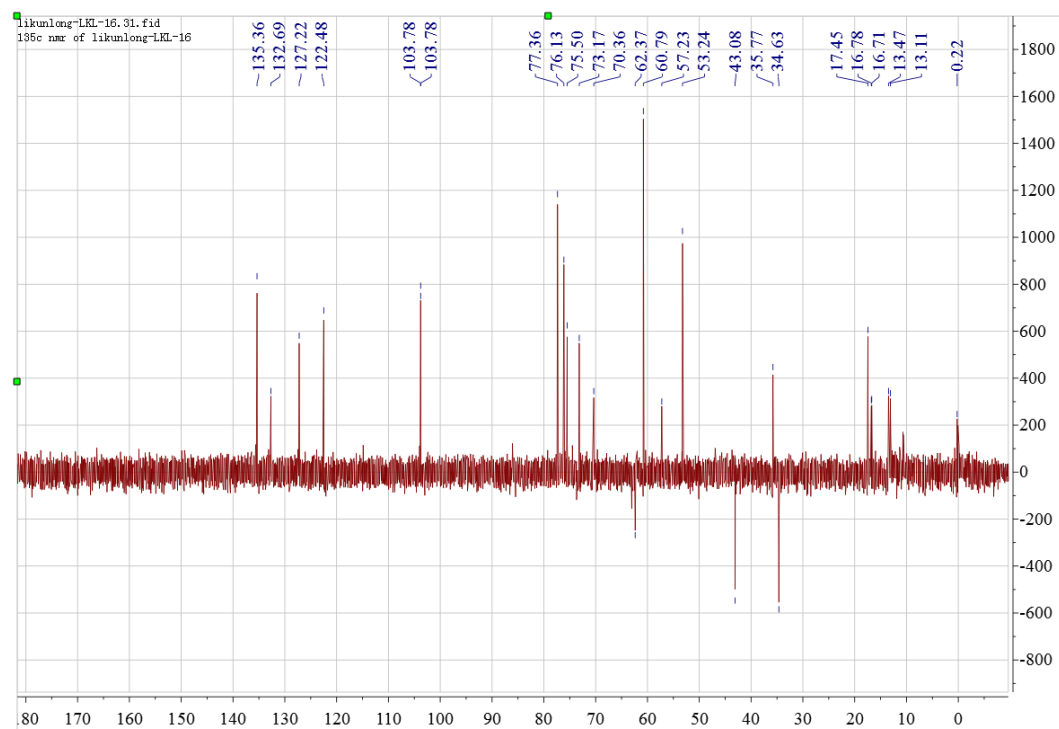

**Figure SS-19-5.** DEPT spectrum of **24** (in  $\text{CDCl}_3$ , 175 MHz).

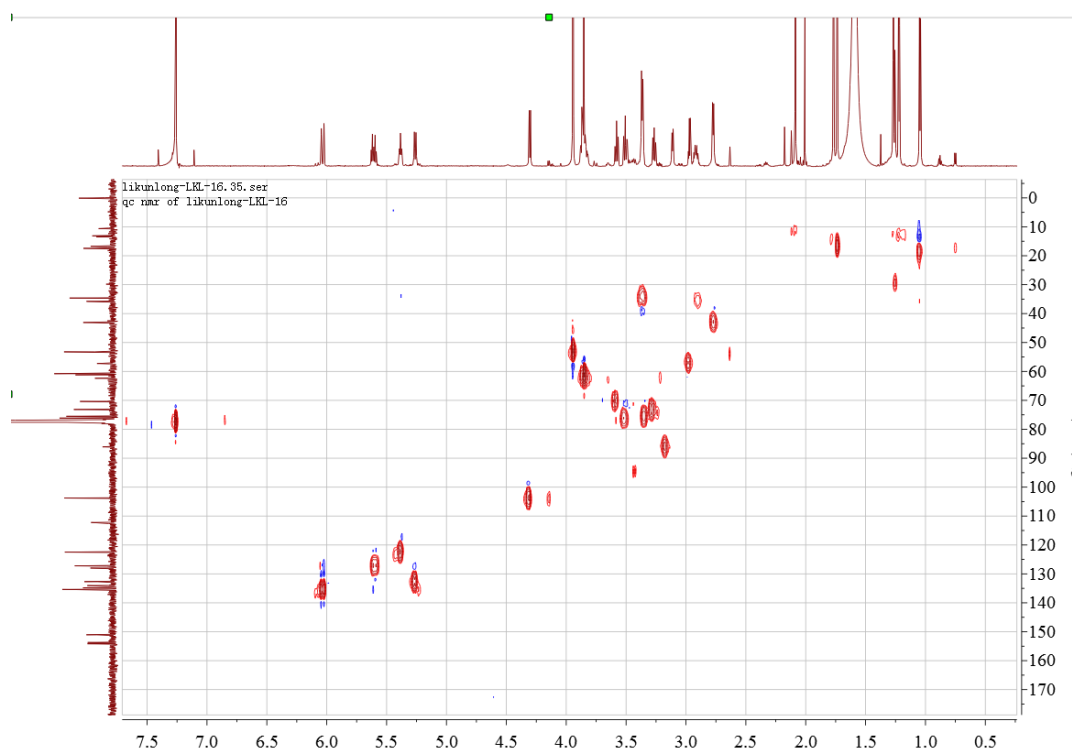

**Figure SS-19-6.** HSQC spectrum of **24** (in  $\text{CDCl}_3$ ).

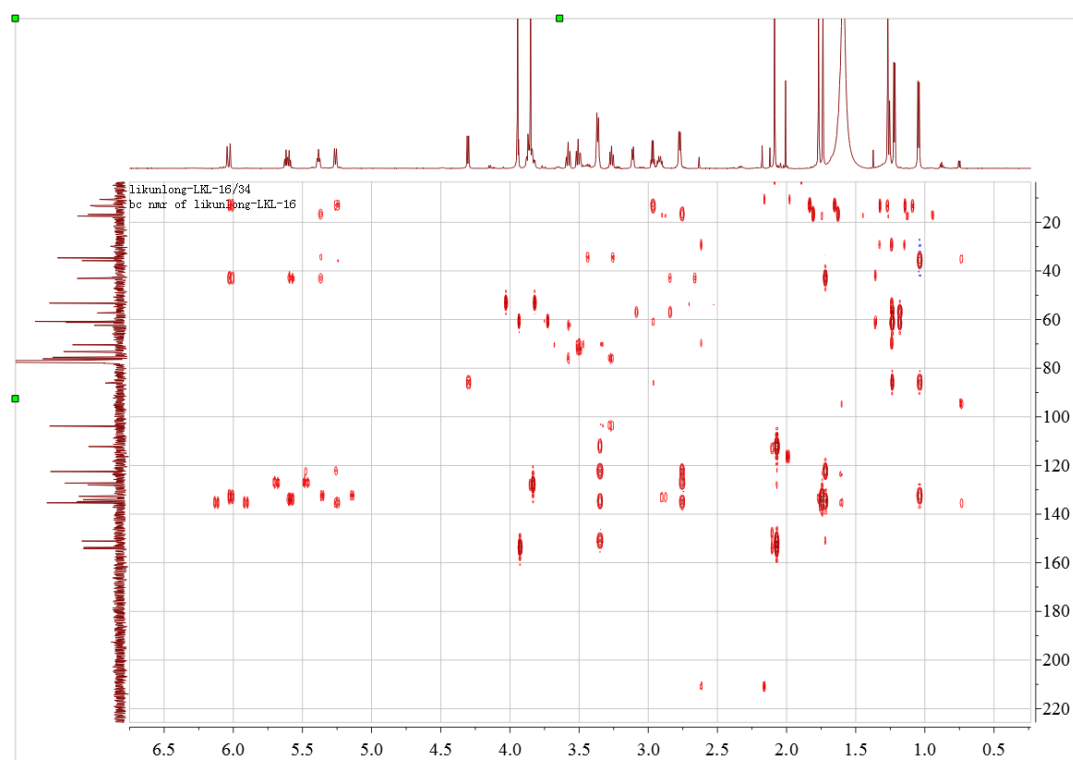

**Figure SS-19-7.** HMBC spectrum of **24** (in  $\text{CDCl}_3$ ).

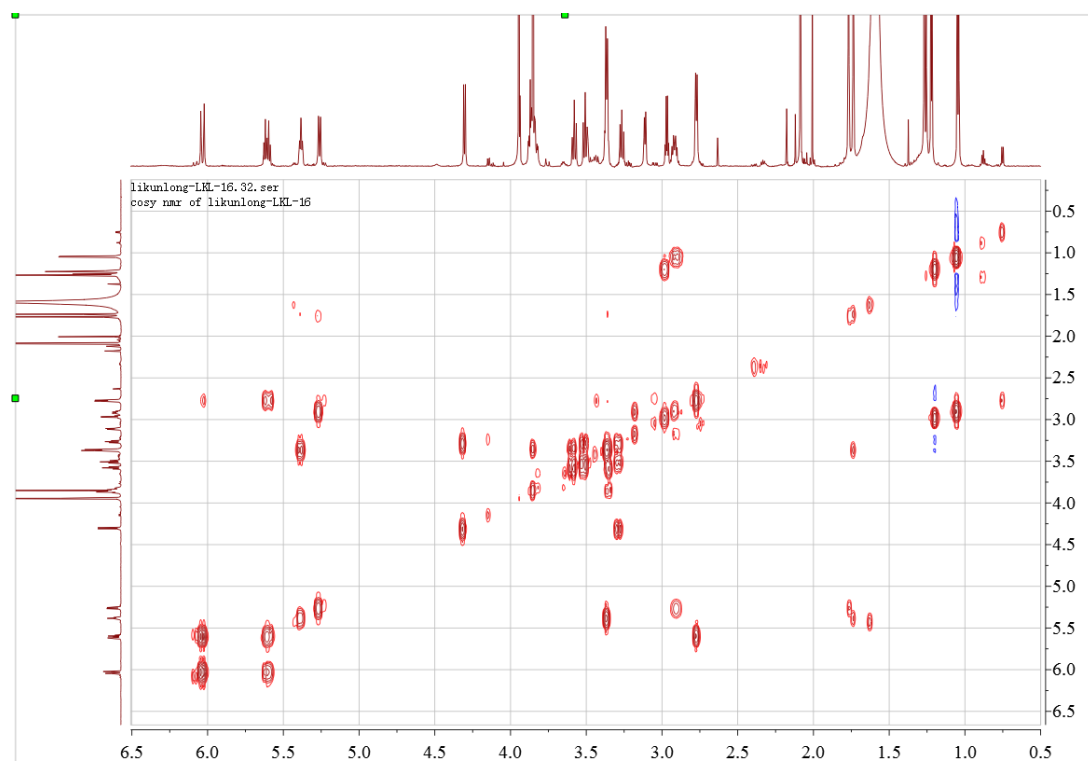

**Figure SS-19-8.**  $^1\text{H}$ - $^1\text{H}$  COSY spectrum of **24** (in  $\text{CDCl}_3$ ).

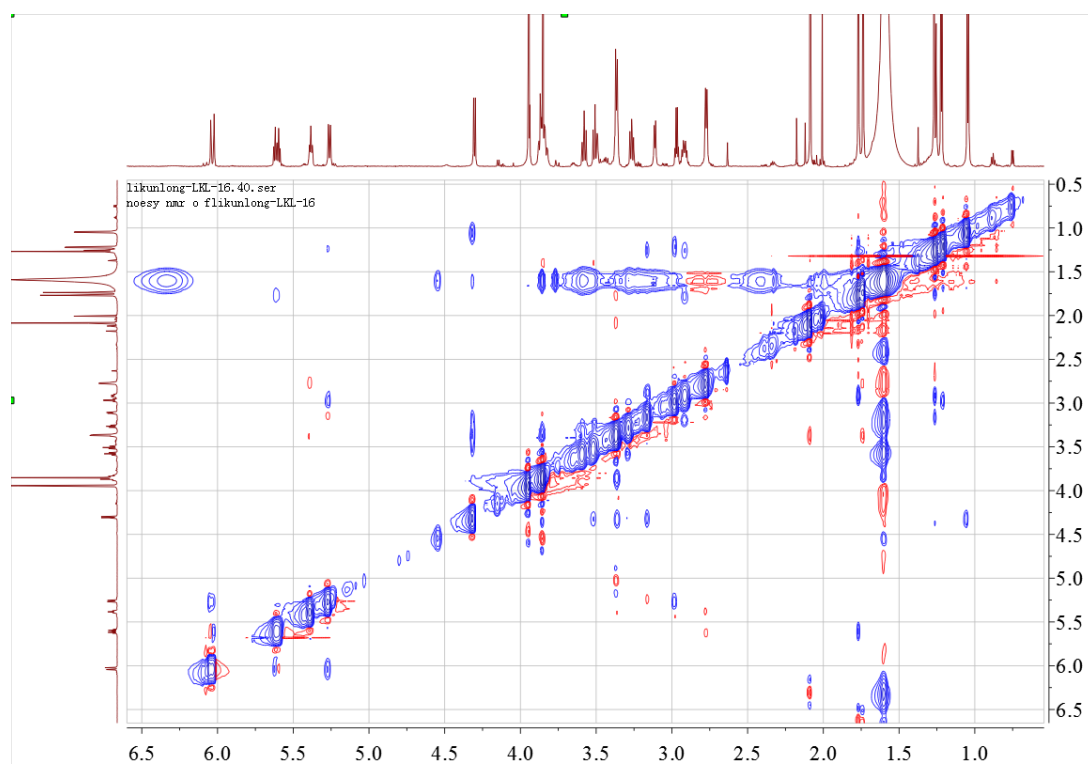

**Figure SS-19-9.** NOESY spectrum of **24** (in  $\text{CDCl}_3$ ).

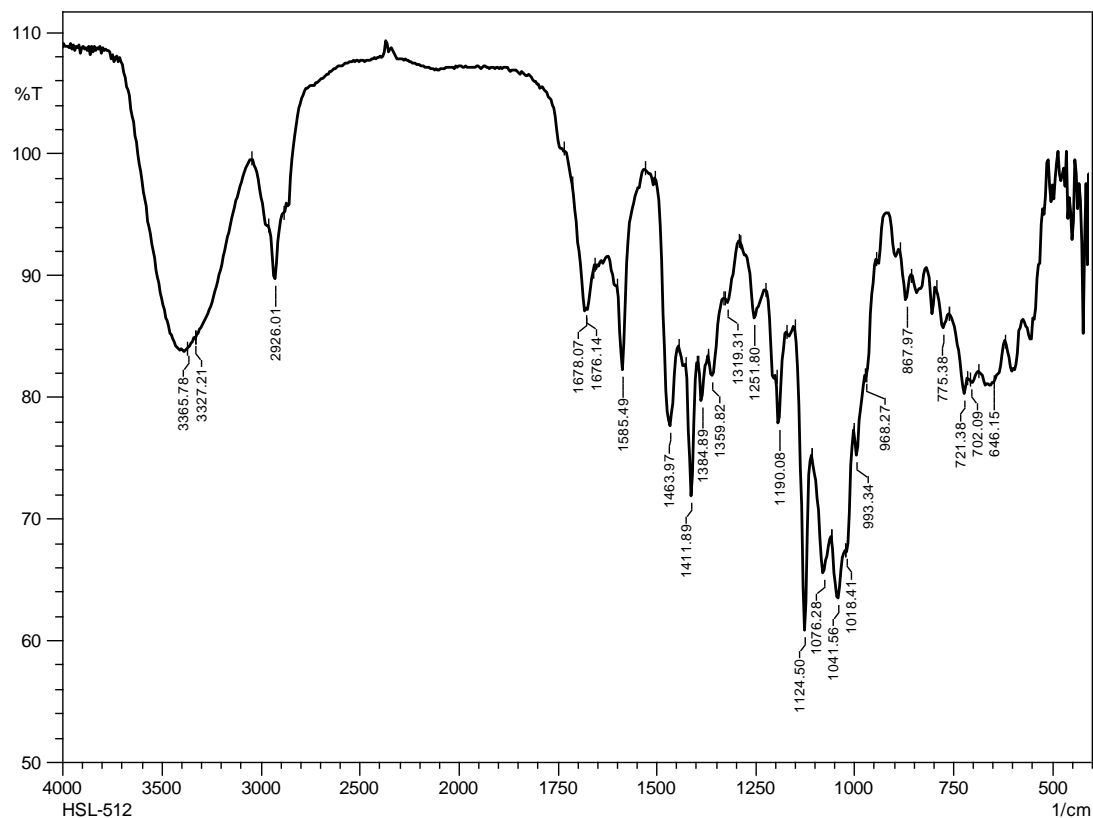

Figure SS-20-1. IR spectrum of 25.

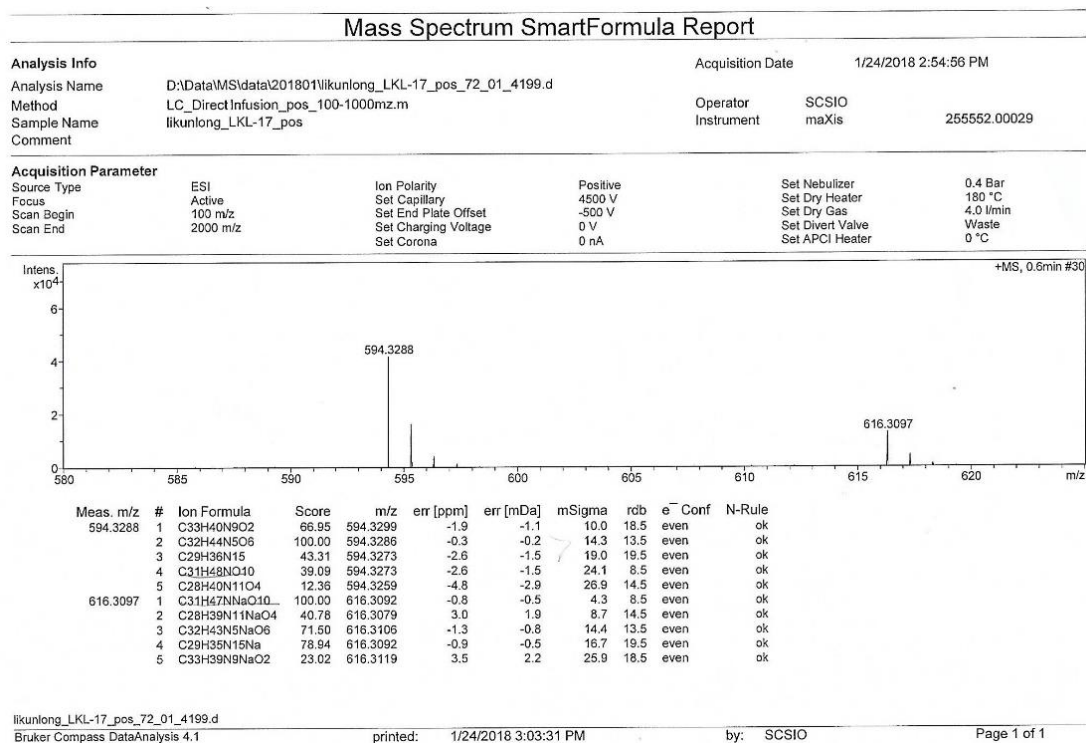

Figure SS-20-2. HRESIMS (+) spectrum of 25.

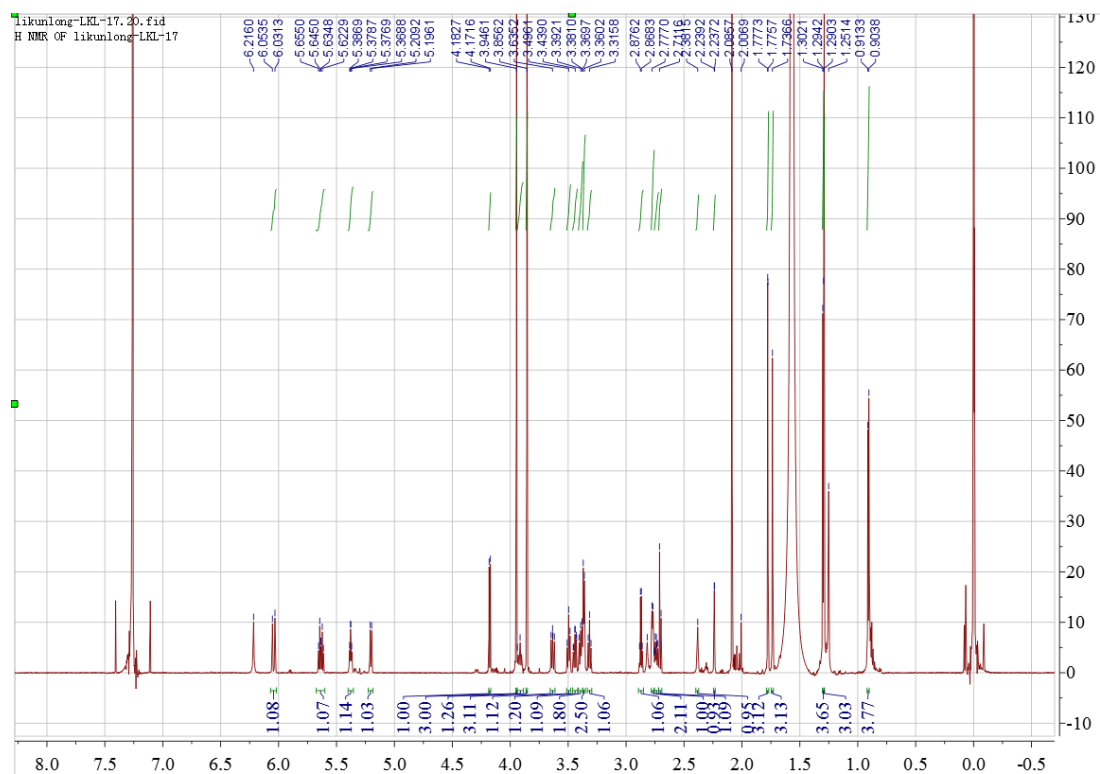

**Figure SS-20-3.**  $^1\text{H}$  NMR spectrum of **25** (in  $\text{CDCl}_3$ , 700 MHz).

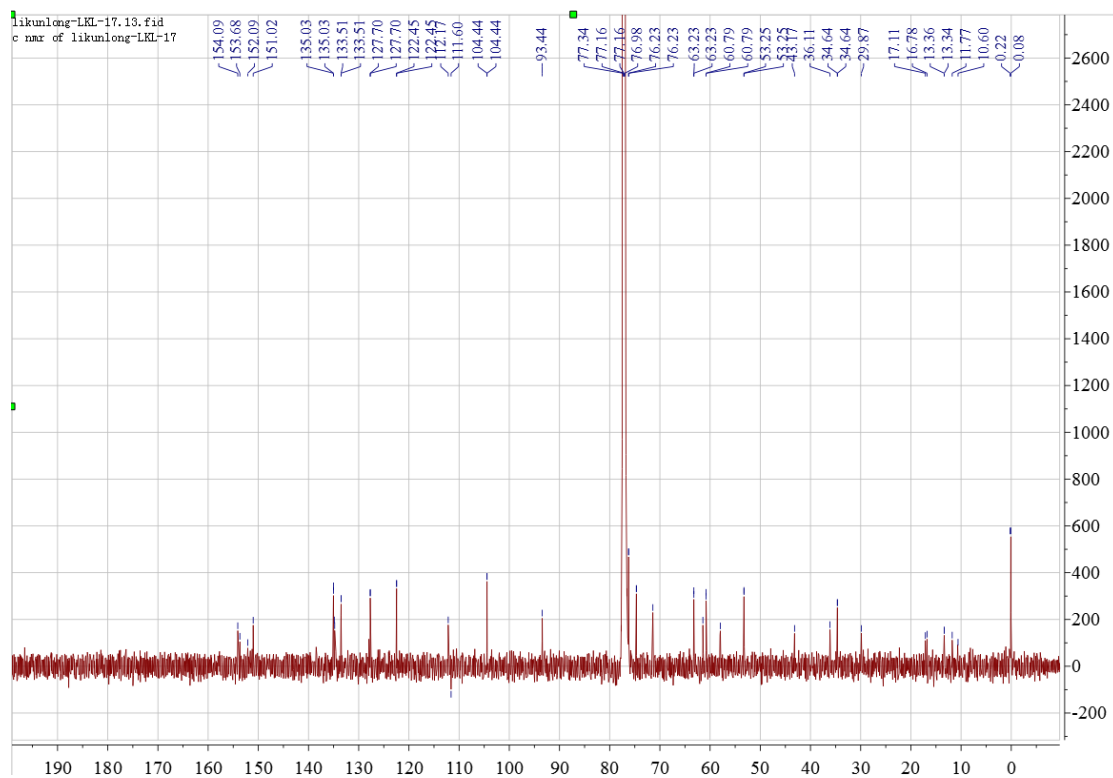

**Figure SS-20-4.**  $^{13}\text{C}$  NMR spectrum of **25** (in  $\text{CDCl}_3$ , 175 MHz).



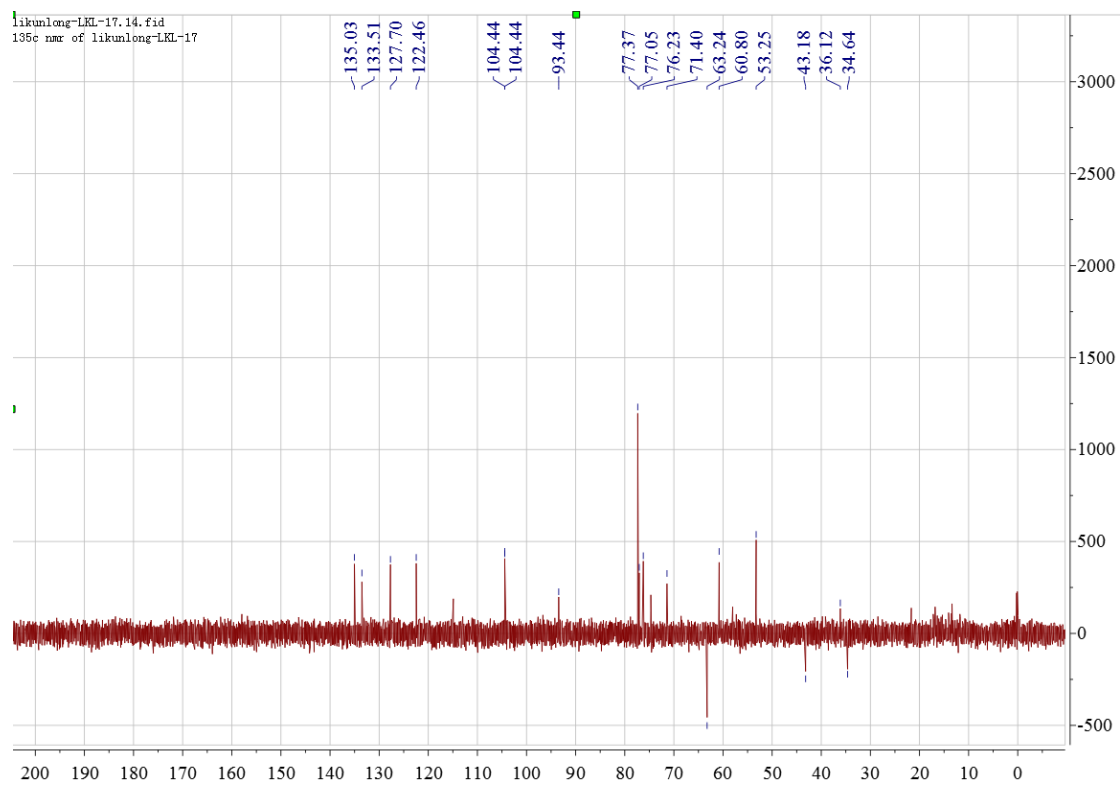

**Figure SS-20-5.** DEPT spectrum of **25** (in  $\text{CDCl}_3$ , 175 MHz).

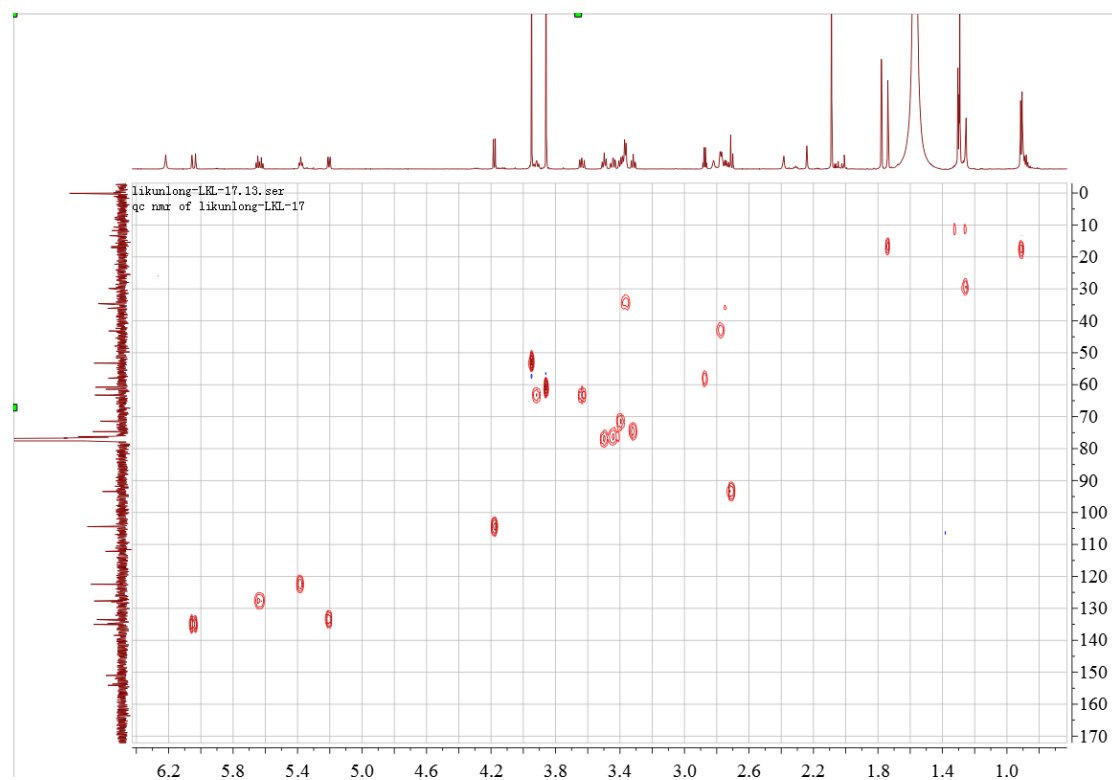

**Figure SS-20-6.** HSQC spectrum of **25** (in  $\text{CDCl}_3$ ).

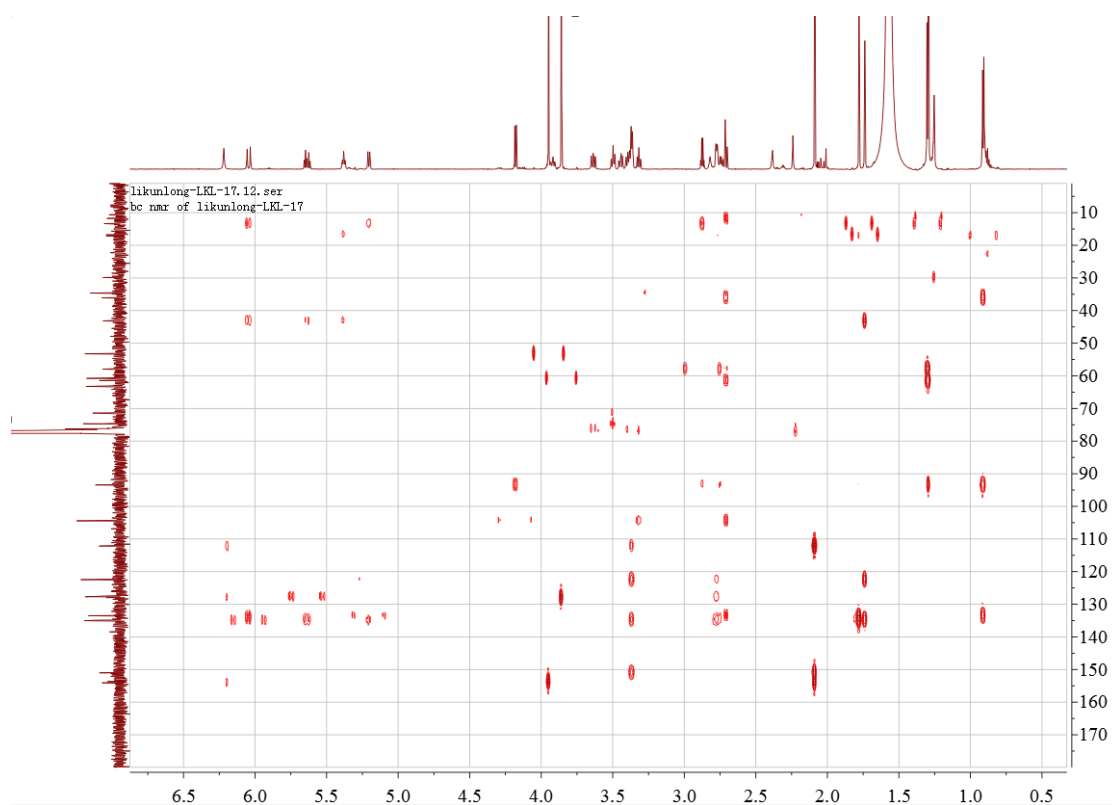

**Figure SS-20-7.** HMBC spectrum of **25** (in  $\text{CDCl}_3$ ).

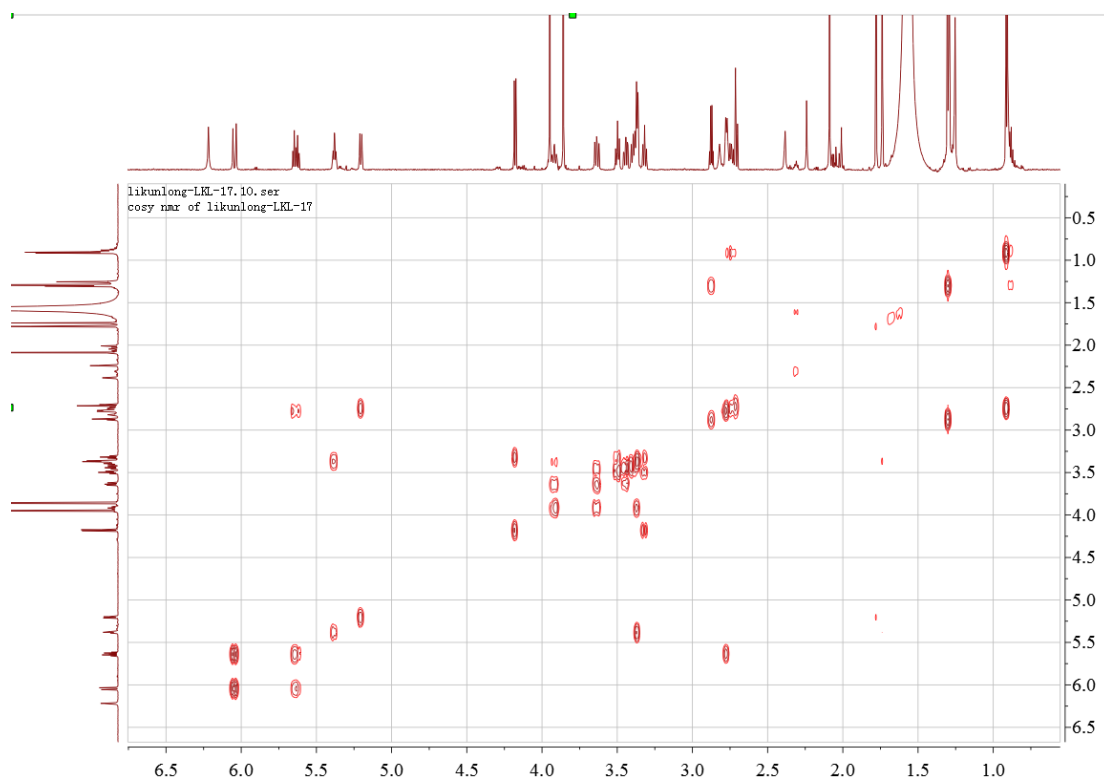

**Figure SS-20-8.**  $^1\text{H}$ - $^1\text{H}$  COSY spectrum of **25** (in  $\text{CDCl}_3$ ).

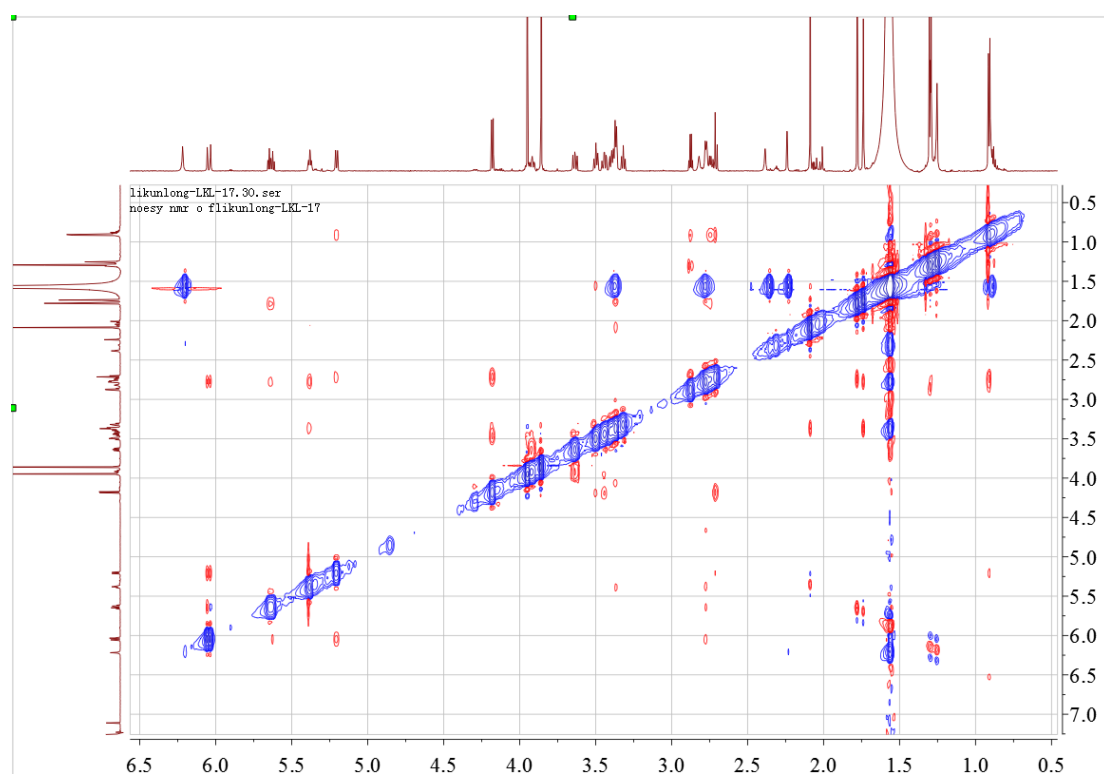

**Figure SS-20-9.** NOESY spectrum of **25** (in  $\text{CDCl}_3$ ).

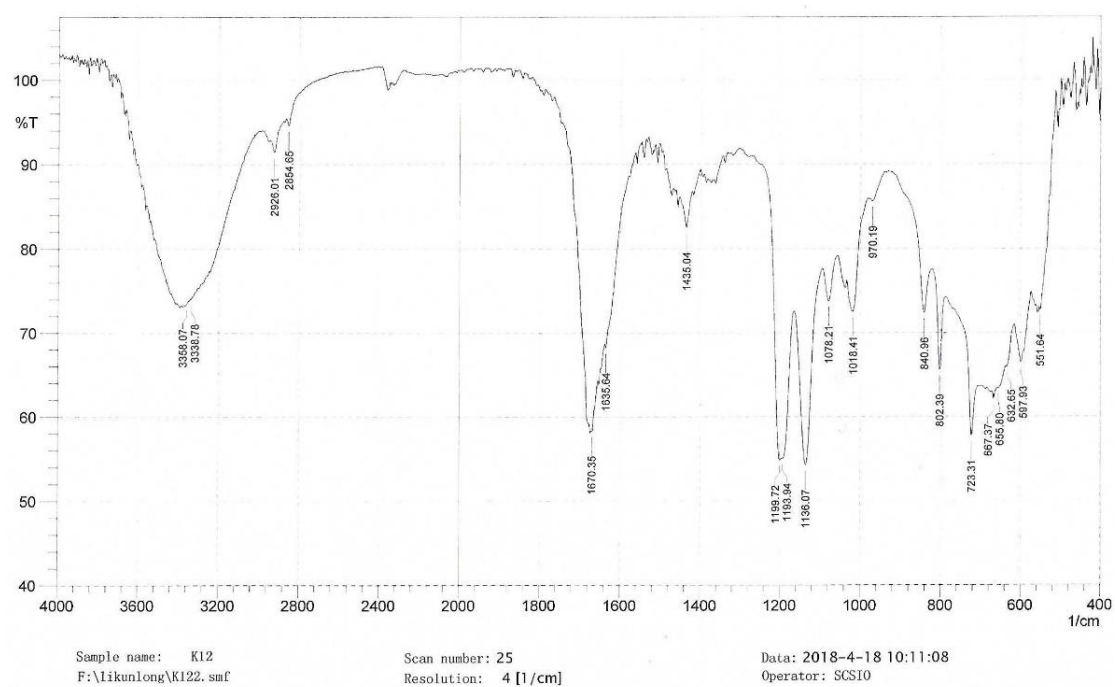

**Figure SS-21-1.** IR spectrum of **26**.

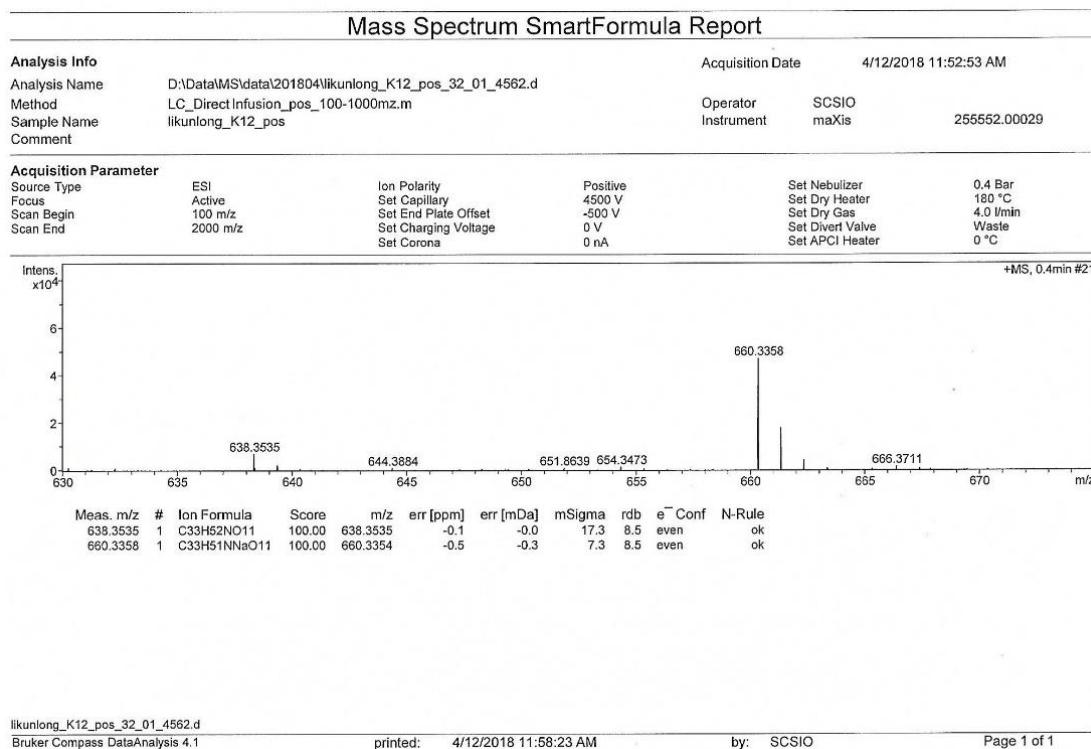

**Figure SS-21-2.** HRESIMS spectrum of **26**.

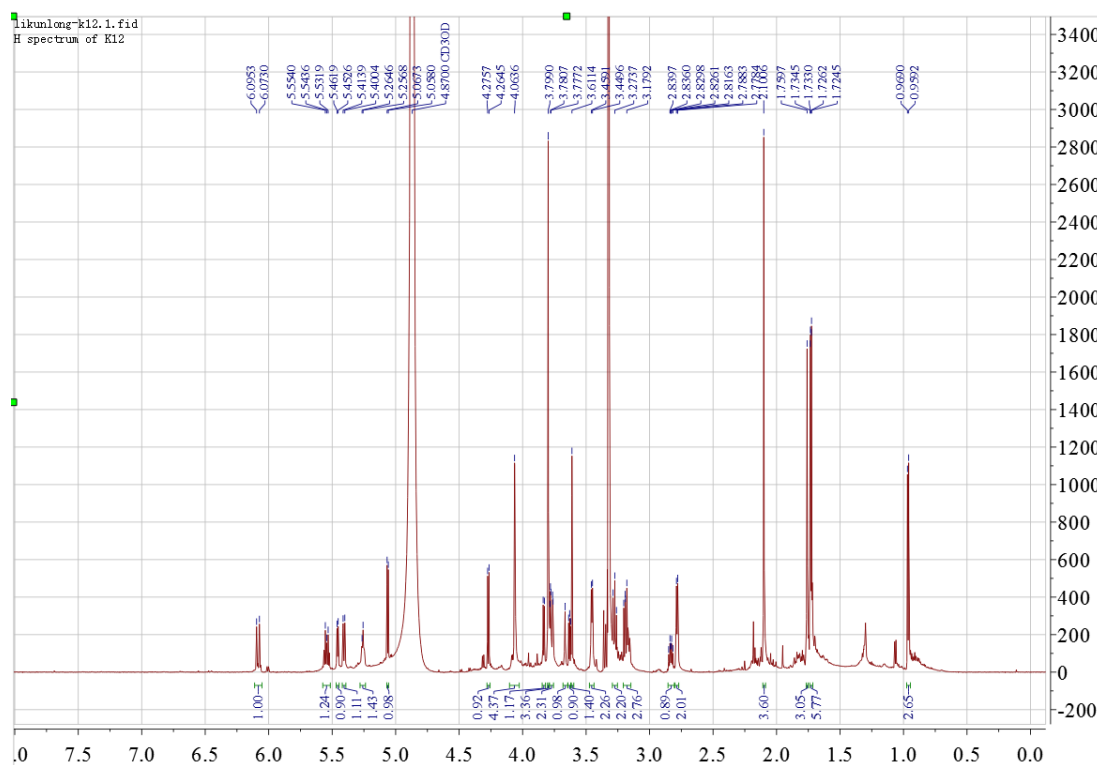

**Figure SS-21-3.** <sup>1</sup>H-NMR spectrum of **26** (in MeOD, 700 MHz).

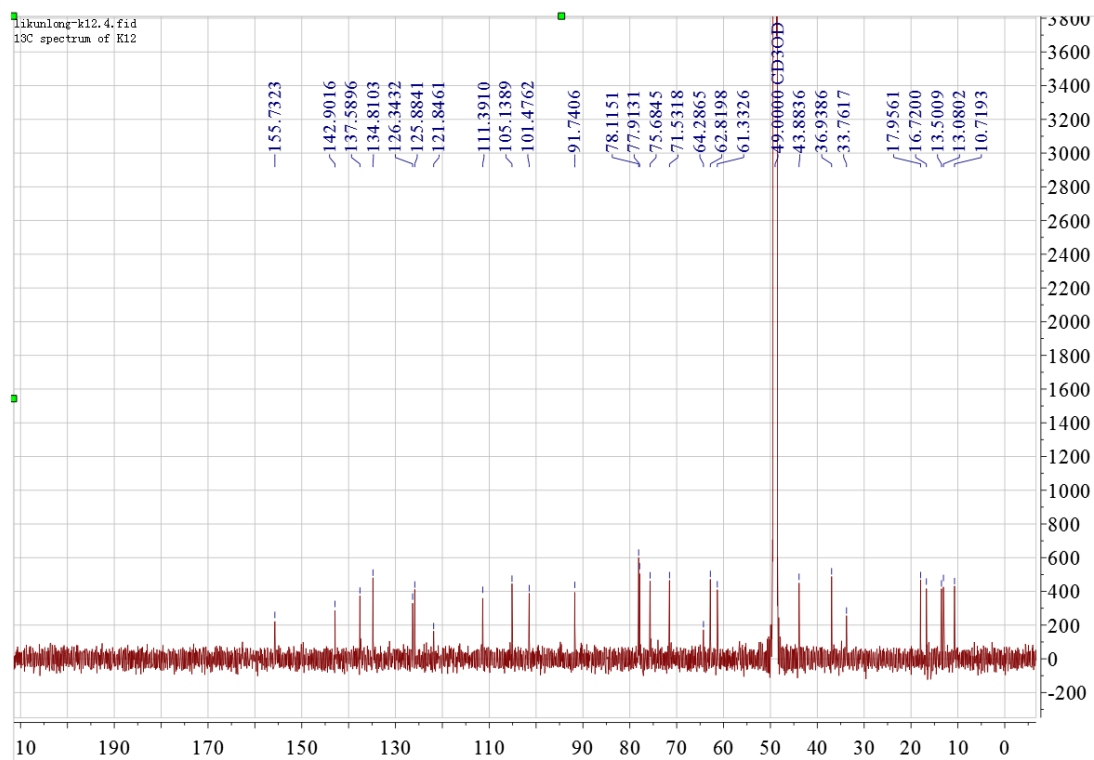

**Figure SS-21-4.**  $^{13}\text{C}$ -NMR spectrum of **26** (in MeOD, 175 MHz).

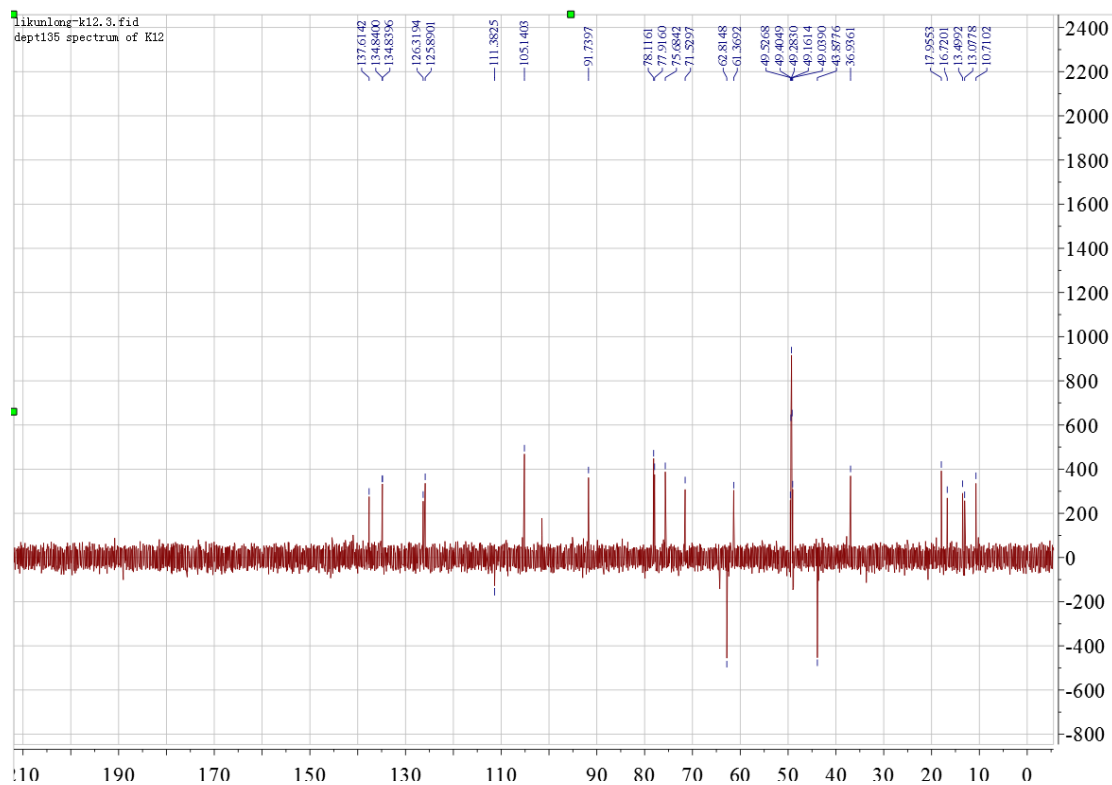

**Figure SS-21-5.** DEPT spectrum of **26** (in MeOD, 175 MHz).

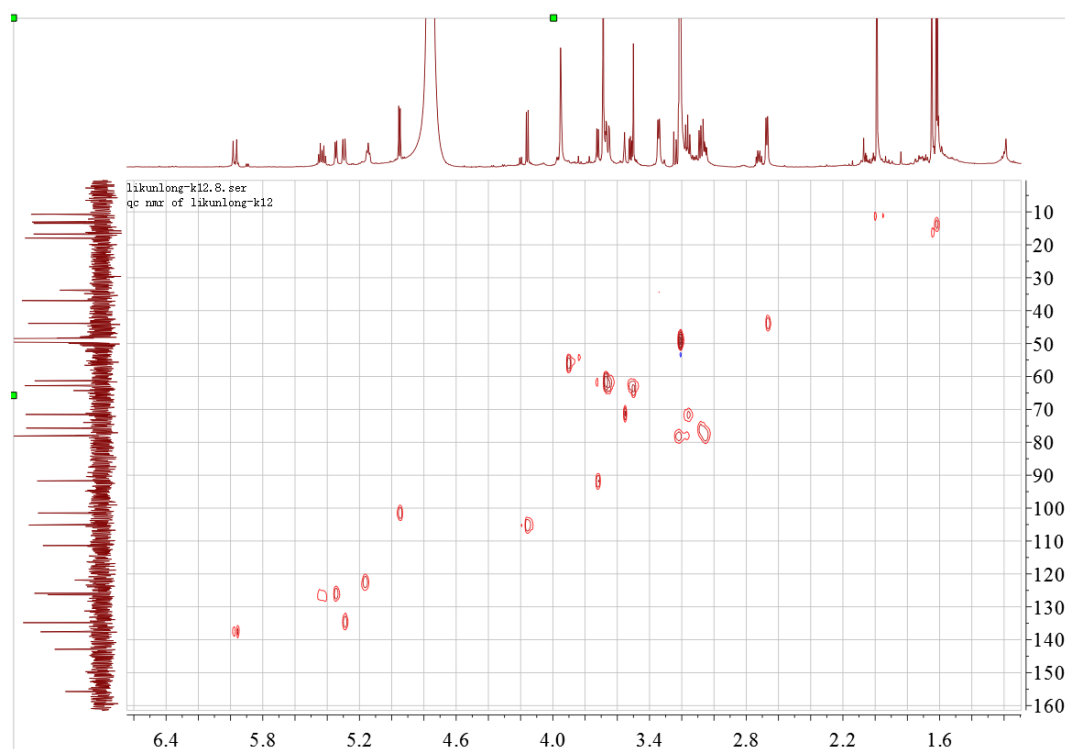

**Figure SS-21-6.** HSQC spectrum of **26** (in MeOD).

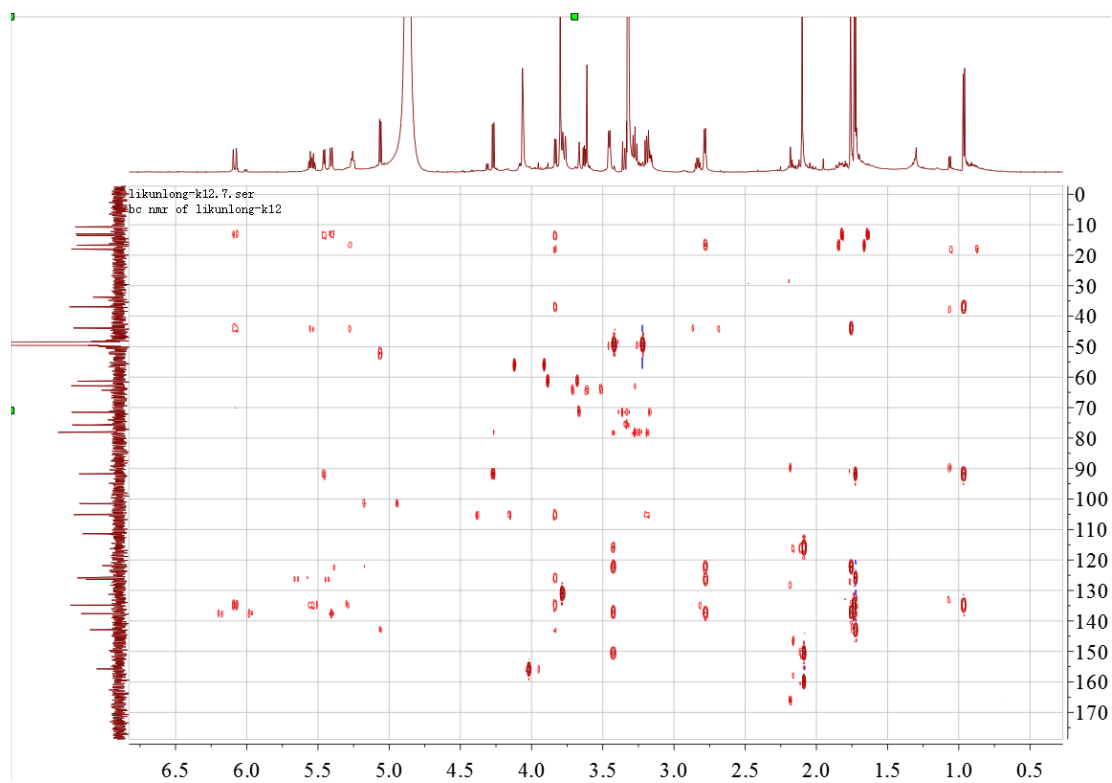

**Figure SS-21-7.** HMBC spectrum of **26** (in MeOD).

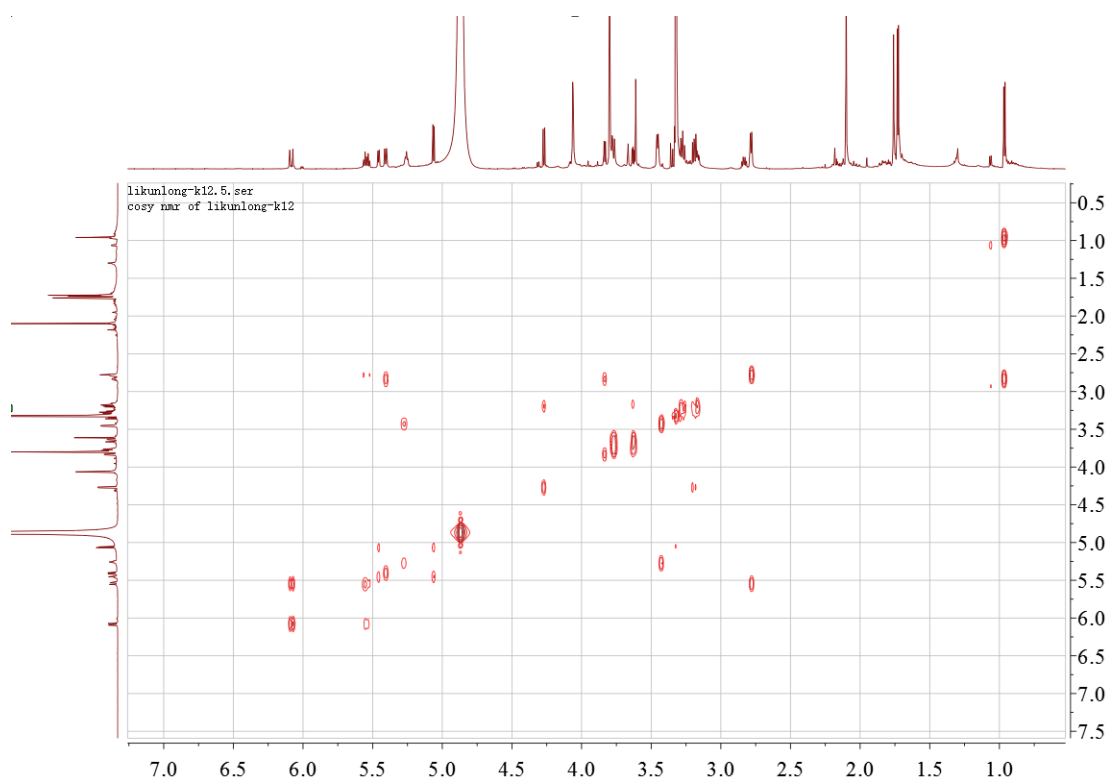

**Figure SS-21-8.** COSY spectrum of **26** (in MeOD).
